# Supplementary material for: Sperm Methylome Profiling Can Discern Fertility Levels in the Porcine Biomedical Model
Source: Int J Mol Sci. 2021 Mar 6;22(5):2679. doi: 10.3390/ijms22052679 (PMC7961483; doi:10.3390/ijms22052679)
Supplement: Supplementary file 1 [file ijms-22-02679-s001.zip › supp for conversion final/Spreadsheet_20210305.xlsx]

## Sheet: Spreadsheet S1
Coordinates				Site Summary in the analysed population N=7									A1 Allelo frequence per treatment				GWAS																Phenotypic Effect							Annotation
Location	Chr	Pos	Marker	Ref	Alt	Major.Allele	Minor.Allele	Major.Allele.Frequency	Minor.Allele.Frequency	Proportion.Missing	Number.Heterozygous	Proportion.Heterozygous	A1	F_A_inHy	F_A inLow	A2	df	F	p	add_effect	add_F	add_p	dom_effect	dom_F	dom_p	errordf	MarkerR2	Genetic.Var	Residual.Var	X.2LnLikelihood	FDR	BONF	Allele	Eff1	Eff2	Eff3	Obs1	Obs2	Obs3	annotation	geneChr	geneStart	geneEnd	geneLength	geneStrand	transcriptId	distanceToTSS	geneId	original_id
chr1:252108	chr1	252108	S1_252108	C	T	C	T	0.64286	0.35714	0	1	0.14286	T	0.3333	0.375	C	2	15927.3	1.5764e-08	-0.115912	0.0515703	0.831487	0.734094	2.06832	0.223772	5	0.999874	1.13408	1.13408e-05	12.4572	9.61171e-08	0.00142946	C/T/Y	-0.850005	-0.618182	0	4	2	1	Distal Intergenic	1	230200	239393	9194	1	ENSSSCT00000091536.1	21908	ENSSSCG00000041881	ENSSSCG00000041881
chr1:252110	chr1	252110	S1_252110	T	C	T	C	0.57143	0.42857	0	2	0.28571	C	0.1667	0.625	T	2	0.572772	0.604307	0.575831	1.10233	0.353001	-0.324156	0.102743	0.764609	5	0.222628	1.44383e-05	1.44383	12.8207	0.828853	1	C/T/Y	0.899986	-0.251675	0	2	3	2	Distal Intergenic	1	230200	239393	9194	1	ENSSSCT00000091536.1	21910	ENSSSCG00000041881	ENSSSCG00000041881
chr1:276821	chr1	276821	S1_276821	G	A	A	G	0.5	0.5	0	3	0.42857	A	0.3333	0.625	G	2	0.541228	0.619402	0.507497	0.704773	0.44843	-0.567491	0.37768	0.572084	5	0.212979	1.46175e-05	1.46175	12.8701	0.842568	1	A/G/R	1.07499	0.0599936	0	2	2	3	Distal Intergenic	1	290192	303670	13479	1	ENSSSCT00000078035.1	-13371	ENSSSCG00000043002	ENSSSCG00000043002
chr1:276851	chr1	276851	S1_276851	A	C	A	C	0.57143	0.42857	0	2	0.28571	C	0.1667	0.625	A	2	0.572772	0.604307	-0.575831	1.10233	0.353001	-0.324156	0.102743	0.764609	5	0.222628	1.44383e-05	1.44383	12.8207	0.828853	1	A/C/M	-0.251675	0.899986	0	3	2	2	Distal Intergenic	1	290192	303670	13479	1	ENSSSCT00000078035.1	-13341	ENSSSCG00000043002	ENSSSCG00000043002
chr1:285038	chr1	285038	S1_285038	T	C	C	T	0.5	0.5	0	3	0.42857	C	0.3333	0.625	T	2	0.541228	0.619402	0.507497	0.704773	0.44843	-0.567491	0.37768	0.572084	5	0.212979	1.46175e-05	1.46175	12.8701	0.842568	1	C/T/Y	1.07499	0.0599936	0	2	2	3	Distal Intergenic	1	290192	303670	13479	1	ENSSSCT00000078035.1	-5154	ENSSSCG00000043002	ENSSSCG00000043002
chr1:295999	chr1	295999	S1_295999	A	G	A	G	0.58333	0.41667	0.14286	3	0.5	G	0.3333	0.5	A	2	1.03706	0.454613	-0.935	1.59493	0.295857	-0.994996	0.956214	0.400258	4	0.408764	1.46165e-05	1.46165	10.8688	0.769888	1	A/G/R	0.0599956	1.93	0	2	1	3	Exon (ENSSSCT00000078035.1/ENSSSCG00000043002.1, exon 5 of 5)	1	290192	303670	13479	1	ENSSSCT00000078035.1	5807	ENSSSCG00000043002	ENSSSCG00000043002
chr1:296084	chr1	296084	S1_296084	T	C	C	T	0.5	0.5	0	3	0.42857	C	0.3333	0.625	T	2	0.541228	0.619402	0.507497	0.704773	0.44843	-0.567491	0.37768	0.572084	5	0.212979	1.46175e-05	1.46175	12.8701	0.842568	1	C/T/Y	1.07499	0.0599936	0	2	2	3	Exon (ENSSSCT00000078035.1/ENSSSCG00000043002.1, exon 5 of 5)	1	290192	303670	13479	1	ENSSSCT00000078035.1	5892	ENSSSCG00000043002	ENSSSCG00000043002
chr1:296114	chr1	296114	S1_296114	A	C	A	C	0.5	0.5	0	3	0.42857	C	0.3333	0.625	A	2	0.541228	0.619402	-0.507497	0.704773	0.44843	-0.567491	0.37768	0.572084	5	0.212979	1.46175e-05	1.46175	12.8701	0.842568	1	A/C/M	0.0599936	1.07499	0	2	2	3	Exon (ENSSSCT00000078035.1/ENSSSCG00000043002.1, exon 5 of 5)	1	290192	303670	13479	1	ENSSSCT00000078035.1	5922	ENSSSCG00000043002	ENSSSCG00000043002
chr1:296168	chr1	296168	S1_296168	G	C	C	G	0.5	0.5	0	3	0.42857	C	0.3333	0.625	G	2	0.541228	0.619402	0.507497	0.704773	0.44843	-0.567491	0.37768	0.572084	5	0.212979	1.46175e-05	1.46175	12.8701	0.842568	1	C/G/S	1.07499	0.0599936	0	2	2	3	Exon (ENSSSCT00000078035.1/ENSSSCG00000043002.1, exon 5 of 5)	1	290192	303670	13479	1	ENSSSCT00000078035.1	5976	ENSSSCG00000043002	ENSSSCG00000043002
chr1:300935	chr1	300935	S1_300935	C	T	C	T	0.5	0.5	0	3	0.42857	T	0.3333	0.625	C	2	0.541228	0.619402	-0.507497	0.704773	0.44843	-0.567491	0.37768	0.572084	5	0.212979	1.46175e-05	1.46175	12.8701	0.842568	1	C/T/Y	0.0599936	1.07499	0	2	2	3	Exon (ENSSSCT00000078035.1/ENSSSCG00000043002.1, exon 5 of 5)	1	290192	303670	13479	1	ENSSSCT00000078035.1	10743	ENSSSCG00000043002	ENSSSCG00000043002
chr1:305363	chr1	305363	S1_305363	C	T	C	T	0.57143	0.42857	0	4	0.57143	T	0.3333	0.5	C	2	0.839852	0.495985	-0.95125	1.47858	0.290848	-0.801199	0.653026	0.46435	5	0.295738	0.820639	0.368955	11.291	0.781202	1	C/T/Y	-0.150051	1.75245	0	2	1	4	Distal Intergenic	1	290192	303670	13479	1	ENSSSCT00000078035.1	15171	ENSSSCG00000043002	ENSSSCG00000043002
chr1:308364	chr1	308364	S1_308364	C	T	C	T	0.78571	0.21429	0	1	0.14286	T	0.5	0	C	2	2.31323	0.215008	0.905855	3.20729	0.147797	-0.552511	0.269918	0.630811	5	0.536311	0.414278	0.353276	10.0829	0.526111	1	C/T/Y	1.45837	-0.353344	0	5	1	1	Distal Intergenic	1	290192	303670	13479	1	ENSSSCT00000078035.1	18172	ENSSSCG00000043002	ENSSSCG00000043002
chr1:308774	chr1	308774	S1_308774	C	T	C	T	0.71429	0.28571	0	2	0.28571	T	0.1667	0.375	C	2	14926.2	1.79492e-08	-0.641446	0.810305	0.418925	0.208545	0.0856475	0.784338	5	0.999866	1.21013	1.21013e-05	12.1145	1.02812e-07	0.00162761	C/T/Y	-0.849991	0.432901	0	4	1	2	Distal Intergenic	1	290192	303670	13479	1	ENSSSCT00000078035.1	18582	ENSSSCG00000043002	ENSSSCG00000043002
chr1:308811	chr1	308811	S1_308811	A	G	A	G	0.78571	0.21429	0	1	0.14286	G	0.5	0	A	2	2.31323	0.215008	0.905855	3.20729	0.147797	-0.552511	0.269918	0.630811	5	0.536311	0.414278	0.353276	10.0829	0.526111	1	A/G/R	1.45837	-0.353344	0	5	1	1	Distal Intergenic	1	290192	303670	13479	1	ENSSSCT00000078035.1	18619	ENSSSCG00000043002	ENSSSCG00000043002
chr1:315864	chr1	315864	S1_315864	G	A	G	A	0.78571	0.21429	0	1	0.14286	A	0.3333	0.125	G	2	18358.8	1.18652e-08	-0.890547	2.27994	0.20557	0.040556	0.00472826	0.948479	5	0.999891	0.983893	9.83893e-06	11.9279	8.89569e-08	0.00107593	A/G/R	-0.931103	0.849991	0	1	5	1	Distal Intergenic	1	290192	303670	13479	1	ENSSSCT00000078035.1	25672	ENSSSCG00000043002	ENSSSCG00000043002
chr1:343086	chr1	343086	S1_343086	G	A	G	A	0.57143	0.42857	0	4	0.57143	A	0.5	0.375	G	2	0.587499	0.597447	-0.336124	0.181093	0.692333	1.02976	1.1338	0.346973	5	0.227053	0.982422	0.350058	11.8373	0.823633	1	A/G/R	-1.36588	-0.693632	0	1	2	4	Distal Intergenic	1	375494	381792	6299	1	ENSSSCT00000074442.1	-32408	ENSSSCG00000050193	ENSSSCG00000050193
chr1:349412	chr1	349412	S1_349412	G	C	G	C	0.64286	0.35714	0	3	0.42857	C	0.5	0.25	G	2	18281.1	1.19664e-08	-0.361941	0.37358	0.574088	1.21194	4.18849	0.110117	5	0.999891	0.988077	9.88077e-06	11.3533	8.89569e-08	0.0010851	C/G/S	-1.57388	-0.849996	0	1	3	3	Distal Intergenic	1	375494	381792	6299	1	ENSSSCT00000074442.1	-26082	ENSSSCG00000050193	ENSSSCG00000050193
chr1:349421	chr1	349421	S1_349421	G	A	G	A	0.64286	0.35714	0	3	0.42857	A	0.5	0.25	G	2	18281.1	1.19664e-08	-0.361941	0.37358	0.574088	1.21194	4.18849	0.110117	5	0.999891	0.988077	9.88077e-06	11.3533	8.89569e-08	0.0010851	A/G/R	-1.57388	-0.849996	0	1	3	3	Distal Intergenic	1	375494	381792	6299	1	ENSSSCT00000074442.1	-26073	ENSSSCG00000050193	ENSSSCG00000050193
chr1:354866	chr1	354866	S1_354866	G	T	G	T	0.57143	0.42857	0	2	0.28571	T	0	0.75	G	2	14.6173	0.0144856	-1.14083	27.9463	0.00614334	0.220834	0.307987	0.608488	5	0.879644	2.2354e-06	0.22354	5.35888	0.0639536	1	G/T/K	-1.36167	0.919999	0	3	2	2	Distal Intergenic	1	375494	381792	6299	1	ENSSSCT00000074442.1	-20628	ENSSSCG00000050193	ENSSSCG00000050193
chr1:370275	chr1	370275	S1_370275	T	C	T	C	0.66667	0.33333	0.14286	2	0.33333	C	0.3333	0.3333	T	2	1.51798	0.350398	-0.540002	0.808043	0.434947	1.61499	2.89098	0.187636	4	0.502979	1.08261e-05	1.08261	9.96818	0.696766	1	C/T/Y	-2.15499	-1.07499	0	1	3	2	Distal Intergenic	1	375494	381792	6299	1	ENSSSCT00000074442.1	-5219	ENSSSCG00000050193	ENSSSCG00000050193
chr1:370301	chr1	370301	S1_370301	T	G	T	G	0.66667	0.33333	0.14286	2	0.33333	G	0.3333	0.3333	T	2	1.51798	0.350398	-0.540002	0.808043	0.434947	1.61499	2.89098	0.187636	4	0.502979	1.08261e-05	1.08261	9.96818	0.696766	1	G/T/K	-2.15499	-1.07499	0	1	3	2	Distal Intergenic	1	375494	381792	6299	1	ENSSSCT00000074442.1	-5193	ENSSSCG00000050193	ENSSSCG00000050193
chr1:372342	chr1	372342	S1_372342	T	C	T	C	0.71429	0.28571	0	2	0.28571	C	0.1667	0.375	T	2	14926.2	1.79492e-08	0.641446	0.810305	0.418925	0.208545	0.0856475	0.784338	5	0.999866	1.21013	1.21013e-05	12.1145	1.02812e-07	0.00162761	C/T/Y	0.432901	-0.849991	0	1	4	2	Distal Intergenic	1	375494	381792	6299	1	ENSSSCT00000074442.1	-3152	ENSSSCG00000050193	ENSSSCG00000050193
chr1:382677	chr1	382677	S1_382677	C	T	T	C	0.57143	0.42857	0	2	0.28571	C	0.3333	0.5	T	2	0.210068	0.818934	-0.0917389	0.0189271	0.897223	0.741872	0.416133	0.554009	5	0.0950505	1.28332	0.339101	12.4088	0.940348	1	C/T/Y	-0.833611	-0.650133	0	2	3	2	Distal Intergenic	1	375494	381792	6299	1	ENSSSCT00000074442.1	7183	ENSSSCG00000050193	ENSSSCG00000050193
chr1:388184	chr1	388184	S1_388184	C	T	C	T	0.71429	0.28571	0	2	0.28571	T	0.1667	0.375	C	2	14926.2	1.79492e-08	-0.641446	0.810305	0.418925	0.208545	0.0856475	0.784338	5	0.999866	1.21013	1.21013e-05	12.1145	1.02812e-07	0.00162761	C/T/Y	-0.849991	0.432901	0	4	1	2	Distal Intergenic	1	394443	399458	5016	1	ENSSSCT00000086221.1	-6259	ENSSSCG00000046031	ENSSSCG00000046031
chr1:406514	chr1	406514	S1_406514	G	A	A	G	0.5	0.5	0	3	0.42857	A	0.5	0.5	G	2	16721.9	1.43016e-08	-0.012461	0.000604966	0.981555	0.837541	2.73288	0.173645	5	0.99988	1.0802	1.0802e-05	11.8233	9.56413e-08	0.00129685	A/G/R	-0.850002	-0.82508	0	2	2	3	Distal Intergenic	1	418505	422224	3720	1	ENSSSCT00000069482.1	-11991	ENSSSCG00000042397	ENSSSCG00000042397
chr1:406533	chr1	406533	S1_406533	A	C	A	C	0.5	0.5	0	3	0.42857	C	0.5	0.5	A	2	16721.9	1.43016e-08	0.012461	0.000604966	0.981555	0.837541	2.73288	0.173645	5	0.99988	1.0802	1.0802e-05	11.8233	9.56413e-08	0.00129685	A/C/M	-0.82508	-0.850002	0	2	2	3	Distal Intergenic	1	418505	422224	3720	1	ENSSSCT00000069482.1	-11972	ENSSSCG00000042397	ENSSSCG00000042397
chr1:408020	chr1	408020	S1_408020	C	T	C	T	0.57143	0.42857	0	4	0.57143	T	0.5	0.375	C	2	0.587499	0.597447	0.336124	0.181093	0.692333	1.02976	1.1338	0.346973	5	0.227053	0.982422	0.350058	11.8373	0.823633	1	C/T/Y	-0.693632	-1.36588	0	2	1	4	Distal Intergenic	1	418505	422224	3720	1	ENSSSCT00000069482.1	-10485	ENSSSCG00000042397	ENSSSCG00000042397
chr1:408039	chr1	408039	S1_408039	G	T	G	T	0.57143	0.42857	0	4	0.57143	T	0.5	0.375	G	2	0.587499	0.597447	0.336124	0.181093	0.692333	1.02976	1.1338	0.346973	5	0.227053	0.982422	0.350058	11.8373	0.823633	1	G/T/K	-0.693632	-1.36588	0	2	1	4	Distal Intergenic	1	418505	422224	3720	1	ENSSSCT00000069482.1	-10466	ENSSSCG00000042397	ENSSSCG00000042397
chr1:409215	chr1	409215	S1_409215	T	G	T	G	0.58333	0.41667	0.14286	3	0.5	G	0.25	0.5	T	2	13738.8	1.14062e-06	0.0448484	0.00621062	0.942148	0.894843	2.47244	0.213907	4	0.999891	1.31471	1.31471e-05	11.0209	5.43542e-06	0.103431	G/T/K	-0.849995	-0.939692	0	1	2	3	Distal Intergenic	1	418505	422224	3720	1	ENSSSCT00000069482.1	-9290	ENSSSCG00000042397	ENSSSCG00000042397
chr1:409487	chr1	409487	S1_409487	T	C	T	C	0.6	0.4	0.28571	2	0.4	C	0.5	0.25	T	2	0.227628	0.814579	-0.320701	0.113249	0.768505	0.90775	0.401774	0.590999	3	0.180327	1.81231	1.81231e-05	7.4753	0.940348	1	C/T/Y	-1.22845	-0.587049	0	1	2	2	Distal Intergenic	1	418505	422224	3720	1	ENSSSCT00000069482.1	-9018	ENSSSCG00000042397	ENSSSCG00000042397
chr1:429681	chr1	429681	S1_429681	G	A	G	A	0.64286	0.35714	0	3	0.42857	A	0.5	0.25	G	2	18281.1	1.19664e-08	-0.361941	0.37358	0.574088	1.21194	4.18849	0.110117	5	0.999891	0.988077	9.88077e-06	11.3533	8.89569e-08	0.0010851	A/G/R	-1.57388	-0.849996	0	1	3	3	Distal Intergenic	1	418505	422224	3720	1	ENSSSCT00000069482.1	11176	ENSSSCG00000042397	ENSSSCG00000042397
chr1:462334	chr1	462334	S1_462334	C	T	T	C	0.58333	0.41667	0.14286	1	0.16667	C	0.5	0.3333	T	2	0.457831	0.670616	-0.475416	0.561336	0.508119	-0.70984	0.223481	0.668665	4	0.00024303	1.57797	1.57797e-05	11.5507	0.867529	1	C/T/Y	0.234424	1.18526	0	2	3	1	Distal Intergenic	1	470506	475345	4840	1	ENSSSCT00000052221.1	-8172	ENSSSCG00000035944	ENSSSCG00000035944
chr1:462335	chr1	462335	S1_462335	G	A	G	A	0.75	0.25	0.14286	1	0.16667	A	0.1667	0.3333	G	2	0.258753	0.787644	0.399375	0.222969	0.669011	-1.10725	0.45038	0.550205	4	0.145575	1.29955	0.48615	11.7468	0.926341	1	A/G/R	1.50663	0.707878	0	1	4	1	Distal Intergenic	1	470506	475345	4840	1	ENSSSCT00000052221.1	-8171	ENSSSCG00000035944	ENSSSCG00000035944
chr1:462372	chr1	462372	S1_462372	C	T	T	C	0.58333	0.41667	0.14286	1	0.16667	C	0.5	0.3333	T	2	0.457831	0.670616	-0.475416	0.561336	0.508119	-0.70984	0.223481	0.668665	4	0.00024303	1.57797	1.57797e-05	11.5507	0.867529	1	C/T/Y	0.234424	1.18526	0	2	3	1	Distal Intergenic	1	470506	475345	4840	1	ENSSSCT00000052221.1	-8134	ENSSSCG00000035944	ENSSSCG00000035944
chr1:465970	chr1	465970	S1_465970	G	A	A	G	0.5	0.5	0	1	0.14286	A	0.3333	0.625	G	2	17277.8	1.33962e-08	0.280381	0.395061	0.563756	1.13038	6.42073	0.0643959	5	0.999884	1.04544	1.04544e-05	12.202	9.54843e-08	0.00121476	A/G/R	-0.85	-1.41076	0	3	3	1	Distal Intergenic	1	470506	475345	4840	1	ENSSSCT00000052221.1	-4536	ENSSSCG00000035944	ENSSSCG00000035944
chr1:465994	chr1	465994	S1_465994	A	G	A	G	0.5	0.5	0	1	0.14286	G	0.3333	0.625	A	2	17277.8	1.33962e-08	-0.280381	0.395061	0.563756	1.13038	6.42073	0.0643959	5	0.999884	1.04544	1.04544e-05	12.202	9.54843e-08	0.00121476	A/G/R	-1.41076	-0.85	0	3	3	1	Distal Intergenic	1	470506	475345	4840	1	ENSSSCT00000052221.1	-4512	ENSSSCG00000035944	ENSSSCG00000035944
chr1:466504	chr1	466504	S1_466504	G	A	A	G	0.57143	0.42857	0	2	0.28571	G	0.5	0.375	A	2	12443.9	2.5823e-08	0.059988	0.0104338	0.923557	0.909973	2.40076	0.196204	5	0.999839	1.45149	1.45149e-05	13.0051	1.31662e-07	0.00234161	A/G/R	-0.849985	-0.969961	0	3	2	2	Distal Intergenic	1	470506	475345	4840	1	ENSSSCT00000052221.1	-4002	ENSSSCG00000035944	ENSSSCG00000035944
chr1:476175	chr1	476175	S1_476175	T	C	C	T	0.57143	0.42857	0	2	0.28571	T	0.5	0.375	C	2	12443.9	2.5823e-08	0.059988	0.0104338	0.923557	0.909973	2.40076	0.196204	5	0.999839	1.45149	1.45149e-05	13.0051	1.31662e-07	0.00234161	C/T/Y	-0.849985	-0.969961	0	3	2	2	Distal Intergenic	1	470506	475345	4840	1	ENSSSCT00000083733.1	5669	ENSSSCG00000035944	ENSSSCG00000035944
chr1:476617	chr1	476617	S1_476617	T	A	A	T	0.57143	0.42857	0	2	0.28571	T	0.5	0.375	A	2	12443.9	2.5823e-08	0.059988	0.0104338	0.923557	0.909973	2.40076	0.196204	5	0.999839	1.45149	1.45149e-05	13.0051	1.31662e-07	0.00234161	A/T/W	-0.849985	-0.969961	0	3	2	2	Distal Intergenic	1	482720	485656	2937	1	ENSSSCT00000077472.1	-6103	ENSSSCG00000047845	ENSSSCG00000047845
chr1:476633	chr1	476633	S1_476633	G	C	C	G	0.57143	0.42857	0	2	0.28571	G	0.5	0.375	C	2	12443.9	2.5823e-08	0.059988	0.0104338	0.923557	0.909973	2.40076	0.196204	5	0.999839	1.45149	1.45149e-05	13.0051	1.31662e-07	0.00234161	C/G/S	-0.849985	-0.969961	0	3	2	2	Distal Intergenic	1	482720	485656	2937	1	ENSSSCT00000077472.1	-6087	ENSSSCG00000047845	ENSSSCG00000047845
chr1:499830	chr1	499830	S1_499830	C	T	T	C	0.57143	0.42857	0	2	0.28571	C	0.5	0.375	T	2	12443.9	2.5823e-08	-0.059988	0.0104338	0.923557	0.909973	2.40076	0.196204	5	0.999839	1.45149	1.45149e-05	13.0051	1.31662e-07	0.00234161	C/T/Y	-0.969961	-0.849985	0	2	3	2	Distal Intergenic	1	482720	485656	2937	1	ENSSSCT00000077472.1	17110	ENSSSCG00000047845	ENSSSCG00000047845
chr1:505488	chr1	505488	S1_505488	C	G	C	G	0.58333	0.41667	0.14286	1	0.16667	G	0.5	0.3333	C	2	0.457831	0.670616	0.475416	0.561336	0.508119	-0.70984	0.223481	0.668665	4	0.00024303	1.57797	1.57797e-05	11.5507	0.867529	1	C/G/S	1.18526	0.234424	0	3	2	1	Distal Intergenic	1	482720	485656	2937	1	ENSSSCT00000077472.1	22768	ENSSSCG00000047845	ENSSSCG00000047845
chr1:518692	chr1	518692	S1_518692	C	T	T	C	0.58333	0.41667	0.14286	1	0.16667	C	0.5	0.3333	T	2	0.457831	0.670616	-0.475416	0.561336	0.508119	-0.70984	0.223481	0.668665	4	0.00024303	1.57797	1.57797e-05	11.5507	0.867529	1	C/T/Y	0.234424	1.18526	0	2	3	1	Intron (ENSSSCT00000004434.4/ENSSSCG00000004010.4, intron 10 of 15)	1	512676	538014	25339	2	ENSSSCT00000004434.4	19322	ENSSSCG00000004010	ENSSSCG00000004010
chr1:526232	chr1	526232	S1_526232	T	C	C	T	0.57143	0.42857	0	2	0.28571	T	0.5	0.375	C	2	12443.9	2.5823e-08	0.059988	0.0104338	0.923557	0.909973	2.40076	0.196204	5	0.999839	1.45149	1.45149e-05	13.0051	1.31662e-07	0.00234161	C/T/Y	-0.849985	-0.969961	0	3	2	2	Intron (ENSSSCT00000004434.4/ENSSSCG00000004010.4, intron 9 of 15)	1	512676	538014	25339	2	ENSSSCT00000004434.4	11782	ENSSSCG00000004010	ENSSSCG00000004010
chr1:541796	chr1	541796	S1_541796	A	G	A	G	0.64286	0.35714	0	1	0.14286	G	0.3333	0.375	A	2	16064.5	1.54958e-08	0.151997	0.0864727	0.783338	1.002	3.75766	0.124597	5	0.999876	1.12439	1.12439e-05	12.3892	9.61171e-08	0.00140515	A/G/R	-0.850003	-1.154	0	4	2	1	Promoter (<=1kb)	1	541028	551963	10936	1	ENSSSCT00000004433.4	768	ENSSSCG00000004009	ENSSSCG00000004009
chr1:589212	chr1	589212	S1_589212	A	G	A	G	0.5	0.5	0	3	0.42857	G	0.3333	0.625	A	2	0.541228	0.619402	-0.507497	0.704773	0.44843	-0.567491	0.37768	0.572084	5	0.212979	1.46175e-05	1.46175	12.8701	0.842568	1	A/G/R	0.0599936	1.07499	0	2	2	3	Intron (ENSSSCT00000086163.1/ENSSSCG00000004008.4, intron 2 of 24)	1	578508	720106	141599	1	ENSSSCT00000004431.4	10704	ENSSSCG00000004008	ENSSSCG00000004008
chr1:593686	chr1	593686	S1_593686	A	C	C	A	0.57143	0.42857	0	2	0.28571	A	0.5	0.375	C	2	12443.9	2.5823e-08	-0.059988	0.0104338	0.923557	0.909973	2.40076	0.196204	5	0.999839	1.45149	1.45149e-05	13.0051	1.31662e-07	0.00234161	A/C/M	-0.969961	-0.849985	0	2	3	2	Intron (ENSSSCT00000086163.1/ENSSSCG00000004008.4, intron 3 of 24)	1	578508	720106	141599	1	ENSSSCT00000004431.4	15178	ENSSSCG00000004008	ENSSSCG00000004008
chr1:593711	chr1	593711	S1_593711	A	C	C	A	0.57143	0.42857	0	2	0.28571	A	0.5	0.375	C	2	12443.9	2.5823e-08	-0.059988	0.0104338	0.923557	0.909973	2.40076	0.196204	5	0.999839	1.45149	1.45149e-05	13.0051	1.31662e-07	0.00234161	A/C/M	-0.969961	-0.849985	0	2	3	2	Intron (ENSSSCT00000086163.1/ENSSSCG00000004008.4, intron 3 of 24)	1	578508	720106	141599	1	ENSSSCT00000004431.4	15203	ENSSSCG00000004008	ENSSSCG00000004008
chr1:594917	chr1	594917	S1_594917	T	C	C	T	0.57143	0.42857	0	2	0.28571	T	0.5	0.375	C	2	12443.9	2.5823e-08	0.059988	0.0104338	0.923557	0.909973	2.40076	0.196204	5	0.999839	1.45149	1.45149e-05	13.0051	1.31662e-07	0.00234161	C/T/Y	-0.849985	-0.969961	0	3	2	2	Intron (ENSSSCT00000086163.1/ENSSSCG00000004008.4, intron 3 of 24)	1	578508	720106	141599	1	ENSSSCT00000004431.4	16409	ENSSSCG00000004008	ENSSSCG00000004008
chr1:597496	chr1	597496	S1_597496	C	T	T	C	0.58333	0.41667	0.14286	3	0.5	C	0.5	0.375	T	2	0.868634	0.503953	0.062503	0.00962261	0.928044	-1.13749	1.68726	0.284785	4	0.366724	1.08261e-05	1.08261	9.96818	0.781202	1	C/T/Y	1.19999	1.07499	0	1	2	3	Intron (ENSSSCT00000086163.1/ENSSSCG00000004008.4, intron 3 of 24)	1	578508	720106	141599	1	ENSSSCT00000004431.4	18988	ENSSSCG00000004008	ENSSSCG00000004008
chr1:610314	chr1	610314	S1_610314	A	G	A	G	0.5	0.5	0	1	0.14286	G	0.3333	0.625	A	2	17277.8	1.33962e-08	-0.280381	0.395061	0.563756	1.13038	6.42073	0.0643959	5	0.999884	1.04544	1.04544e-05	12.202	9.54843e-08	0.00121476	A/G/R	-1.41076	-0.85	0	3	3	1	Intron (ENSSSCT00000086163.1/ENSSSCG00000004008.4, intron 11 of 24)	1	578508	720106	141599	1	ENSSSCT00000004431.4	31806	ENSSSCG00000004008	ENSSSCG00000004008
chr1:692440	chr1	692440	S1_692440	G	A	G	A	0.64286	0.35714	0	1	0.14286	A	0.5	0.25	G	2	0.286513	0.76509	-0.338407	0.308847	0.608006	-0.618559	0.180455	0.692837	5	0.125306	1.19169	0.351312	12.295	0.911583	1	A/G/R	0.280152	0.956966	0	2	4	1	Intron (ENSSSCT00000080489.1/ENSSSCG00000004008.4, intron 23 of 23)	1	578508	720106	141599	1	ENSSSCT00000004431.4	113932	ENSSSCG00000004008	ENSSSCG00000004008
chr1:699526	chr1	699526	S1_699526	A	G	G	A	0.57143	0.42857	0	2	0.28571	A	0.5	0.375	G	2	12443.9	2.5823e-08	-0.059988	0.0104338	0.923557	0.909973	2.40076	0.196204	5	0.999839	1.45149	1.45149e-05	13.0051	1.31662e-07	0.00234161	A/G/R	-0.969961	-0.849985	0	2	3	2	3' UTR	1	578508	720106	141599	1	ENSSSCT00000004431.4	121018	ENSSSCG00000004008	ENSSSCG00000004008
chr1:699546	chr1	699546	S1_699546	G	A	A	G	0.57143	0.42857	0	2	0.28571	G	0.5	0.375	A	2	12443.9	2.5823e-08	0.059988	0.0104338	0.923557	0.909973	2.40076	0.196204	5	0.999839	1.45149	1.45149e-05	13.0051	1.31662e-07	0.00234161	A/G/R	-0.849985	-0.969961	0	3	2	2	3' UTR	1	578508	720106	141599	1	ENSSSCT00000004431.4	121038	ENSSSCG00000004008	ENSSSCG00000004008
chr1:699630	chr1	699630	S1_699630	G	A	A	G	0.57143	0.42857	0	2	0.28571	G	0.5	0.375	A	2	12443.9	2.5823e-08	0.059988	0.0104338	0.923557	0.909973	2.40076	0.196204	5	0.999839	1.45149	1.45149e-05	13.0051	1.31662e-07	0.00234161	A/G/R	-0.849985	-0.969961	0	3	2	2	Intron (ENSSSCT00000080489.1/ENSSSCG00000004008.4, intron 23 of 23)	1	578508	720106	141599	1	ENSSSCT00000004431.4	121122	ENSSSCG00000004008	ENSSSCG00000004008
chr1:699652	chr1	699652	S1_699652	T	G	G	T	0.57143	0.42857	0	2	0.28571	T	0.5	0.375	G	2	12443.9	2.5823e-08	0.059988	0.0104338	0.923557	0.909973	2.40076	0.196204	5	0.999839	1.45149	1.45149e-05	13.0051	1.31662e-07	0.00234161	G/T/K	-0.849985	-0.969961	0	3	2	2	Intron (ENSSSCT00000080489.1/ENSSSCG00000004008.4, intron 23 of 23)	1	578508	720106	141599	1	ENSSSCT00000004431.4	121144	ENSSSCG00000004008	ENSSSCG00000004008
chr1:699769	chr1	699769	S1_699769	A	G	A	G	0.5	0.5	0.14286	2	0.33333	G	0.5	0.5	A	2	0.16595	0.854366	-0.232078	0.080753	0.794765	0.572619	0.250216	0.651313	4	0.000103525	1.85443	1.85443e-05	12.0842	0.963464	1	A/G/R	-0.804697	-0.340542	0	2	2	2	Intron (ENSSSCT00000080489.1/ENSSSCG00000004008.4, intron 23 of 23)	1	578508	720106	141599	1	ENSSSCT00000004431.4	121261	ENSSSCG00000004008	ENSSSCG00000004008
chr1:704234	chr1	704234	S1_704234	A	G	G	A	0.57143	0.42857	0	2	0.28571	A	0.5	0.375	G	2	12443.9	2.5823e-08	-0.059988	0.0104338	0.923557	0.909973	2.40076	0.196204	5	0.999839	1.45149	1.45149e-05	13.0051	1.31662e-07	0.00234161	A/G/R	-0.969961	-0.849985	0	2	3	2	Intron (ENSSSCT00000080489.1/ENSSSCG00000004008.4, intron 23 of 23)	1	824090	830568	6479	1	ENSSSCT00000067697.1	-119856	ENSSSCG00000045488	ENSSSCG00000045488
chr1:720724	chr1	720724	S1_720724	C	G	C	G	0.64286	0.35714	0	1	0.14286	G	0.5	0.25	C	2	0.286513	0.76509	0.338407	0.308847	0.608006	-0.618559	0.180455	0.692837	5	0.125306	1.19169	0.351312	12.295	0.911583	1	C/G/S	0.956966	0.280152	0	4	2	1	Distal Intergenic	1	824090	830568	6479	1	ENSSSCT00000067697.1	-103366	ENSSSCG00000045488	ENSSSCG00000045488
chr1:720808	chr1	720808	S1_720808	C	T	C	T	0.58333	0.41667	0.14286	1	0.16667	T	0.5	0.3333	C	2	0.457831	0.670616	0.475416	0.561336	0.508119	-0.70984	0.223481	0.668665	4	0.00024303	1.57797	1.57797e-05	11.5507	0.867529	1	C/T/Y	1.18526	0.234424	0	3	2	1	Distal Intergenic	1	824090	830568	6479	1	ENSSSCT00000067697.1	-103282	ENSSSCG00000045488	ENSSSCG00000045488
chr1:733076	chr1	733076	S1_733076	A	G	G	A	0.57143	0.42857	0	2	0.28571	A	0.5	0.375	G	2	12443.9	2.5823e-08	-0.059988	0.0104338	0.923557	0.909973	2.40076	0.196204	5	0.999839	1.45149	1.45149e-05	13.0051	1.31662e-07	0.00234161	A/G/R	-0.969961	-0.849985	0	2	3	2	Distal Intergenic	1	824090	830568	6479	1	ENSSSCT00000067697.1	-91014	ENSSSCG00000045488	ENSSSCG00000045488
chr1:763812	chr1	763812	S1_763812	T	C	C	T	0.57143	0.42857	0	2	0.28571	T	0.5	0.375	C	2	12443.9	2.5823e-08	0.059988	0.0104338	0.923557	0.909973	2.40076	0.196204	5	0.999839	1.45149	1.45149e-05	13.0051	1.31662e-07	0.00234161	C/T/Y	-0.849985	-0.969961	0	3	2	2	Distal Intergenic	1	824090	830568	6479	1	ENSSSCT00000067697.1	-60278	ENSSSCG00000045488	ENSSSCG00000045488
chr1:808113	chr1	808113	S1_808113	A	G	A	G	0.6	0.4	0.28571	2	0.4	G	0.5	0.25	A	2	0.535896	0.651086	0.754923	0.603954	0.518401	0.999321	0.667266	0.499832	3	0.313403	1.85853	1.85853e-05	7.15196	0.867529	1	A/G/R	-0.244397	-1.75424	0	2	1	2	Distal Intergenic	1	824090	830568	6479	1	ENSSSCT00000067697.1	-15977	ENSSSCG00000045488	ENSSSCG00000045488
chr1:856484	chr1	856484	S1_856484	C	G	C	G	0.5	0.5	0.28571	1	0.2	G	0.25	0.6667	C	2	1.24986	0.444473	-0.685277	1.60369	0.332906	-1.00706	0.644421	0.506349	3	0.526059	1.07569	1.07569e-05	6.22865	0.769122	1	C/G/S	0.321787	1.69234	0	2	2	1	Promoter (<=1kb)	1	857288	882179	24892	1	ENSSSCT00000084254.1	-804	ENSSSCG00000004012	ENSSSCG00000004012
chr1:864355	chr1	864355	S1_864355	C	T	C	T	0.64286	0.35714	0	1	0.14286	T	0.5	0.25	C	2	0.286513	0.76509	0.338407	0.308847	0.608006	-0.618559	0.180455	0.692837	5	0.125306	1.19169	0.351312	12.295	0.911583	1	C/T/Y	0.956966	0.280152	0	4	2	1	Intron (ENSSSCT00000044270.2/ENSSSCG00000004012.4, intron 5 of 20)	1	857563	882183	24621	1	ENSSSCT00000082164.1	6792	ENSSSCG00000004012	ENSSSCG00000004012
chr1:892472	chr1	892472	S1_892472	G	A	G	A	0.78571	0.21429	0	1	0.14286	A	0.1667	0.25	G	2	0.296473	0.758468	0.447312	0.325841	0.598657	-1.04616	0.468006	0.531483	5	0.129099	1.17082	0.357967	12.2356	0.907916	1	A/G/R	1.49347	0.598844	0	1	5	1	Distal Intergenic	1	919554	924549	4996	2	ENSSSCT00000051384.1	32077	ENSSSCG00000035661	ENSSSCG00000035661
chr1:896199	chr1	896199	S1_896199	G	A	A	G	0.5	0.5	0	3	0.42857	A	0.3333	0.625	G	2	0.541228	0.619402	0.507497	0.704773	0.44843	-0.567491	0.37768	0.572084	5	0.212979	1.46175e-05	1.46175	12.8701	0.842568	1	A/G/R	1.07499	0.0599936	0	2	2	3	Distal Intergenic	1	919554	924549	4996	2	ENSSSCT00000051384.1	28350	ENSSSCG00000035661	ENSSSCG00000035661
chr1:910823	chr1	910823	S1_910823	T	A	A	T	0.57143	0.42857	0	2	0.28571	T	0.5	0.375	A	2	12443.9	2.5823e-08	0.059988	0.0104338	0.923557	0.909973	2.40076	0.196204	5	0.999839	1.45149	1.45149e-05	13.0051	1.31662e-07	0.00234161	A/T/W	-0.849985	-0.969961	0	3	2	2	Distal Intergenic	1	919554	924549	4996	2	ENSSSCT00000051384.1	13726	ENSSSCG00000035661	ENSSSCG00000035661
chr1:910825	chr1	910825	S1_910825	A	T	T	A	0.57143	0.42857	0	2	0.28571	A	0.5	0.375	T	2	12443.9	2.5823e-08	-0.059988	0.0104338	0.923557	0.909973	2.40076	0.196204	5	0.999839	1.45149	1.45149e-05	13.0051	1.31662e-07	0.00234161	A/T/W	-0.969961	-0.849985	0	2	3	2	Distal Intergenic	1	919554	924549	4996	2	ENSSSCT00000051384.1	13724	ENSSSCG00000035661	ENSSSCG00000035661
chr1:910899	chr1	910899	S1_910899	T	C	C	T	0.57143	0.42857	0	2	0.28571	T	0.5	0.375	C	2	12443.9	2.5823e-08	0.059988	0.0104338	0.923557	0.909973	2.40076	0.196204	5	0.999839	1.45149	1.45149e-05	13.0051	1.31662e-07	0.00234161	C/T/Y	-0.849985	-0.969961	0	3	2	2	Distal Intergenic	1	919554	924549	4996	2	ENSSSCT00000051384.1	13650	ENSSSCG00000035661	ENSSSCG00000035661
chr1:910912	chr1	910912	S1_910912	A	G	G	A	0.57143	0.42857	0	2	0.28571	A	0.5	0.375	G	2	12443.9	2.5823e-08	-0.059988	0.0104338	0.923557	0.909973	2.40076	0.196204	5	0.999839	1.45149	1.45149e-05	13.0051	1.31662e-07	0.00234161	A/G/R	-0.969961	-0.849985	0	2	3	2	Distal Intergenic	1	919554	924549	4996	2	ENSSSCT00000051384.1	13637	ENSSSCG00000035661	ENSSSCG00000035661
chr1:910987	chr1	910987	S1_910987	C	T	T	C	0.64286	0.35714	0	1	0.14286	C	0.3333	0.375	T	2	16064.5	1.54958e-08	-0.151997	0.0864727	0.783338	1.002	3.75766	0.124597	5	0.999876	1.12439	1.12439e-05	12.3892	9.61171e-08	0.00140515	C/T/Y	-1.154	-0.850003	0	2	4	1	Distal Intergenic	1	919554	924549	4996	2	ENSSSCT00000051384.1	13562	ENSSSCG00000035661	ENSSSCG00000035661
chr1:911000	chr1	911000	S1_911000	A	G	G	A	0.64286	0.35714	0	1	0.14286	A	0.3333	0.375	G	2	16064.5	1.54958e-08	-0.151997	0.0864727	0.783338	1.002	3.75766	0.124597	5	0.999876	1.12439	1.12439e-05	12.3892	9.61171e-08	0.00140515	A/G/R	-1.154	-0.850003	0	2	4	1	Distal Intergenic	1	919554	924549	4996	2	ENSSSCT00000051384.1	13549	ENSSSCG00000035661	ENSSSCG00000035661
chr1:911020	chr1	911020	S1_911020	T	C	C	T	0.57143	0.42857	0	2	0.28571	T	0.5	0.375	C	2	12443.9	2.5823e-08	0.059988	0.0104338	0.923557	0.909973	2.40076	0.196204	5	0.999839	1.45149	1.45149e-05	13.0051	1.31662e-07	0.00234161	C/T/Y	-0.849985	-0.969961	0	3	2	2	Distal Intergenic	1	919554	924549	4996	2	ENSSSCT00000051384.1	13529	ENSSSCG00000035661	ENSSSCG00000035661
chr1:911021	chr1	911021	S1_911021	C	T	T	C	0.57143	0.42857	0	2	0.28571	C	0.5	0.375	T	2	12443.9	2.5823e-08	-0.059988	0.0104338	0.923557	0.909973	2.40076	0.196204	5	0.999839	1.45149	1.45149e-05	13.0051	1.31662e-07	0.00234161	C/T/Y	-0.969961	-0.849985	0	2	3	2	Distal Intergenic	1	919554	924549	4996	2	ENSSSCT00000051384.1	13528	ENSSSCG00000035661	ENSSSCG00000035661
chr1:911034	chr1	911034	S1_911034	G	A	A	G	0.57143	0.42857	0	2	0.28571	G	0.5	0.375	A	2	12443.9	2.5823e-08	0.059988	0.0104338	0.923557	0.909973	2.40076	0.196204	5	0.999839	1.45149	1.45149e-05	13.0051	1.31662e-07	0.00234161	A/G/R	-0.849985	-0.969961	0	3	2	2	Distal Intergenic	1	919554	924549	4996	2	ENSSSCT00000051384.1	13515	ENSSSCG00000035661	ENSSSCG00000035661
chr1:931869	chr1	931869	S1_931869	C	T	C	T	0.5	0.5	0	3	0.42857	T	0.3333	0.625	C	2	0.541228	0.619402	-0.507497	0.704773	0.44843	-0.567491	0.37768	0.572084	5	0.212979	1.46175e-05	1.46175	12.8701	0.842568	1	C/T/Y	0.0599936	1.07499	0	2	2	3	Distal Intergenic	1	919553	924558	5006	2	ENSSSCT00000078633.1	-7311	ENSSSCG00000035661	ENSSSCG00000035661
chr1:933776	chr1	933776	S1_933776	A	G	A	G	0.5	0.5	0.14286	2	0.33333	G	0.5	0.5	A	2	0.16595	0.854366	-0.232078	0.080753	0.794765	0.572619	0.250216	0.651313	4	0.000103525	1.85443	1.85443e-05	12.0842	0.963464	1	A/G/R	-0.804697	-0.340542	0	2	2	2	Distal Intergenic	1	919553	924558	5006	2	ENSSSCT00000078633.1	-9218	ENSSSCG00000035661	ENSSSCG00000035661
chr1:933778	chr1	933778	S1_933778	C	T	C	T	0.5	0.5	0.14286	2	0.33333	C	0.5	0.5	T	2	0.16595	0.854366	0.232078	0.080753	0.794765	0.572619	0.250216	0.651313	4	0.000103525	1.85443	1.85443e-05	12.0842	0.963464	1	C/T/Y	-0.340542	-0.804697	0	2	2	2	Distal Intergenic	1	919553	924558	5006	2	ENSSSCT00000078633.1	-9220	ENSSSCG00000035661	ENSSSCG00000035661
chr1:971670	chr1	971670	S1_971670	T	C	T	C	0.64286	0.35714	0	1	0.14286	C	0.3333	0.375	T	2	15927.3	1.5764e-08	0.115912	0.0515703	0.831487	0.734094	2.06832	0.223772	5	0.999874	1.13408	1.13408e-05	12.4572	9.61171e-08	0.00142946	C/T/Y	-0.618182	-0.850005	0	2	4	1	Distal Intergenic	1	1013707	1013802	96	2	ENSSSCT00000037702.1	42132	ENSSSCG00000032192	ENSSSCG00000032192
chr1:971690	chr1	971690	S1_971690	A	G	A	G	0.64286	0.35714	0	1	0.14286	G	0.3333	0.375	A	2	15927.3	1.5764e-08	-0.115912	0.0515703	0.831487	0.734094	2.06832	0.223772	5	0.999874	1.13408	1.13408e-05	12.4572	9.61171e-08	0.00142946	A/G/R	-0.850005	-0.618182	0	4	2	1	Distal Intergenic	1	1013707	1013802	96	2	ENSSSCT00000037702.1	42112	ENSSSCG00000032192	ENSSSCG00000032192
chr1:971705	chr1	971705	S1_971705	G	C	G	C	0.64286	0.35714	0	1	0.14286	C	0.3333	0.375	G	2	15927.3	1.5764e-08	0.115912	0.0515703	0.831487	0.734094	2.06832	0.223772	5	0.999874	1.13408	1.13408e-05	12.4572	9.61171e-08	0.00142946	C/G/S	-0.618182	-0.850005	0	2	4	1	Distal Intergenic	1	1013707	1013802	96	2	ENSSSCT00000037702.1	42097	ENSSSCG00000032192	ENSSSCG00000032192
chr1:971706	chr1	971706	S1_971706	G	A	G	A	0.64286	0.35714	0	1	0.14286	A	0.3333	0.375	G	2	15927.3	1.5764e-08	0.115912	0.0515703	0.831487	0.734094	2.06832	0.223772	5	0.999874	1.13408	1.13408e-05	12.4572	9.61171e-08	0.00142946	A/G/R	-0.618182	-0.850005	0	2	4	1	Distal Intergenic	1	1013707	1013802	96	2	ENSSSCT00000037702.1	42096	ENSSSCG00000032192	ENSSSCG00000032192
chr1:971714	chr1	971714	S1_971714	G	A	G	A	0.64286	0.35714	0	1	0.14286	A	0.3333	0.375	G	2	15927.3	1.5764e-08	0.115912	0.0515703	0.831487	0.734094	2.06832	0.223772	5	0.999874	1.13408	1.13408e-05	12.4572	9.61171e-08	0.00142946	A/G/R	-0.618182	-0.850005	0	2	4	1	Distal Intergenic	1	1013707	1013802	96	2	ENSSSCT00000037702.1	42088	ENSSSCG00000032192	ENSSSCG00000032192
chr1:974477	chr1	974477	S1_974477	G	T	G	T	0.5	0.5	0.14286	2	0.33333	T	0.5	0.5	G	2	0.16595	0.854366	-0.232078	0.080753	0.794765	0.572619	0.250216	0.651313	4	0.000103525	1.85443	1.85443e-05	12.0842	0.963464	1	G/T/K	-0.804697	-0.340542	0	2	2	2	Distal Intergenic	1	1013707	1013802	96	2	ENSSSCT00000037702.1	39325	ENSSSCG00000032192	ENSSSCG00000032192
chr1:974574	chr1	974574	S1_974574	A	T	A	T	0.71429	0.28571	0	2	0.28571	T	0.1667	0.375	A	2	14926.2	1.79492e-08	-0.641446	0.810305	0.418925	0.208545	0.0856475	0.784338	5	0.999866	1.21013	1.21013e-05	12.1145	1.02812e-07	0.00162761	A/T/W	-0.849991	0.432901	0	4	1	2	Distal Intergenic	1	1013707	1013802	96	2	ENSSSCT00000037702.1	39228	ENSSSCG00000032192	ENSSSCG00000032192
chr1:974589	chr1	974589	S1_974589	G	A	G	A	0.71429	0.28571	0	2	0.28571	A	0.1667	0.375	G	2	14926.2	1.79492e-08	0.641446	0.810305	0.418925	0.208545	0.0856475	0.784338	5	0.999866	1.21013	1.21013e-05	12.1145	1.02812e-07	0.00162761	A/G/R	0.432901	-0.849991	0	1	4	2	Distal Intergenic	1	1013707	1013802	96	2	ENSSSCT00000037702.1	39213	ENSSSCG00000032192	ENSSSCG00000032192
chr1:1033341	chr1	1033341	S1_1033341	C	T	C	T	0.57143	0.42857	0	2	0.28571	T	0.3333	0.5	C	2	0.310544	0.749258	-0.288669	0.199669	0.678115	0.656616	0.344645	0.588697	5	0.134403	1.19212	0.341196	12.238	0.904001	1	C/T/Y	-0.945285	-0.367947	0	3	2	2	Distal Intergenic	1	1013707	1013802	96	2	ENSSSCT00000037702.1	-19539	ENSSSCG00000032192	ENSSSCG00000032192
chr1:1041545	chr1	1041545	S1_1041545	C	G	G	C	0.57143	0.42857	0	2	0.28571	C	0.5	0.375	G	2	12443.9	2.5823e-08	-0.059988	0.0104338	0.923557	0.909973	2.40076	0.196204	5	0.999839	1.45149	1.45149e-05	13.0051	1.31662e-07	0.00234161	C/G/S	-0.969961	-0.849985	0	2	3	2	Distal Intergenic	1	1013707	1013802	96	2	ENSSSCT00000037702.1	-27743	ENSSSCG00000032192	ENSSSCG00000032192
chr1:1053482	chr1	1053482	S1_1053482	C	T	C	T	0.5	0.5	0	3	0.42857	T	0.5	0.5	C	2	0.071929	0.931773	-0.236344	0.0949142	0.773397	0.240365	0.0484636	0.836538	5	0.034716	1.38997	0.352318	12.6217	1	1	C/T/Y	-0.476709	-0.00402194	0	2	2	3	Distal Intergenic	1	1013707	1013802	96	2	ENSSSCT00000037702.1	-39680	ENSSSCG00000032192	ENSSSCG00000032192
chr1:1053557	chr1	1053557	S1_1053557	G	C	C	G	0.57143	0.42857	0	2	0.28571	G	0.5	0.375	C	2	12443.9	2.5823e-08	0.059988	0.0104338	0.923557	0.909973	2.40076	0.196204	5	0.999839	1.45149	1.45149e-05	13.0051	1.31662e-07	0.00234161	C/G/S	-0.849985	-0.969961	0	3	2	2	Distal Intergenic	1	1013707	1013802	96	2	ENSSSCT00000037702.1	-39755	ENSSSCG00000032192	ENSSSCG00000032192
chr1:1053586	chr1	1053586	S1_1053586	T	C	C	T	0.57143	0.42857	0	2	0.28571	T	0.5	0.375	C	2	12443.9	2.5823e-08	0.059988	0.0104338	0.923557	0.909973	2.40076	0.196204	5	0.999839	1.45149	1.45149e-05	13.0051	1.31662e-07	0.00234161	C/T/Y	-0.849985	-0.969961	0	3	2	2	Distal Intergenic	1	1013707	1013802	96	2	ENSSSCT00000037702.1	-39784	ENSSSCG00000032192	ENSSSCG00000032192
chr1:1053698	chr1	1053698	S1_1053698	T	C	C	T	0.5	0.5	0	3	0.42857	C	0.5	0.5	T	2	0.071929	0.931773	0.236344	0.0949142	0.773397	0.240365	0.0484636	0.836538	5	0.034716	1.38997	0.352318	12.6217	1	1	C/T/Y	-0.00402194	-0.476709	0	2	2	3	Distal Intergenic	1	1013707	1013802	96	2	ENSSSCT00000037702.1	-39896	ENSSSCG00000032192	ENSSSCG00000032192
chr1:1058699	chr1	1058699	S1_1058699	C	T	C	T	0.7	0.3	0.28571	1	0.2	T	0.5	0.1667	C	2	14658.1	6.82171e-05	0.347733	0.261913	0.659717	1.19773	3.10719	0.220003	3	0.999932	1.23228	1.23228e-05	6.28522	0.000321916	1	C/T/Y	-0.849999	-1.54546	0	3	1	1	Distal Intergenic	1	1013707	1013802	96	2	ENSSSCT00000037702.1	-44897	ENSSSCG00000032192	ENSSSCG00000032192
chr1:1058736	chr1	1058736	S1_1058736	G	A	G	A	0.7	0.3	0.28571	1	0.2	A	0.5	0.1667	G	2	14658.1	6.82171e-05	-0.347733	0.261913	0.659717	1.19773	3.10719	0.220003	3	0.999932	1.23228	1.23228e-05	6.28522	0.000321916	1	A/G/R	-1.54546	-0.849999	0	1	3	1	Distal Intergenic	1	1013707	1013802	96	2	ENSSSCT00000037702.1	-44934	ENSSSCG00000032192	ENSSSCG00000032192
chr1:1058848	chr1	1058848	S1_1058848	C	T	C	T	0.75	0.25	0.14286	1	0.16667	T	0.25	0.25	C	2	0.337027	0.737842	-0.251106	0.110232	0.761724	-1.18315	0.668813	0.473376	4	0.18344	1.00872	0.358206	9.78999	0.898034	1	C/T/Y	0.932044	1.43426	0	4	1	1	Distal Intergenic	1	1013707	1013802	96	2	ENSSSCT00000037702.1	-45046	ENSSSCG00000032192	ENSSSCG00000032192
chr1:1058877	chr1	1058877	S1_1058877	G	T	G	T	0.75	0.25	0.14286	1	0.16667	T	0.25	0.25	G	2	0.337027	0.737842	-0.251106	0.110232	0.761724	-1.18315	0.668813	0.473376	4	0.18344	1.00872	0.358206	9.78999	0.898034	1	G/T/K	0.932044	1.43426	0	4	1	1	Distal Intergenic	1	1013707	1013802	96	2	ENSSSCT00000037702.1	-45075	ENSSSCG00000032192	ENSSSCG00000032192
chr1:1058909	chr1	1058909	S1_1058909	C	T	C	T	0.75	0.25	0.14286	1	0.16667	T	0.25	0.25	C	2	0.337027	0.737842	-0.251106	0.110232	0.761724	-1.18315	0.668813	0.473376	4	0.18344	1.00872	0.358206	9.78999	0.898034	1	C/T/Y	0.932044	1.43426	0	4	1	1	Distal Intergenic	1	1013707	1013802	96	2	ENSSSCT00000037702.1	-45107	ENSSSCG00000032192	ENSSSCG00000032192
chr1:1083925	chr1	1083925	S1_1083925	T	C	C	T	0.625	0.375	0.42857	1	0.25	T	0.5	0	C	2	0.338522	0.772196	0.642305	0.674388	0.562297	0.141303	0.00927198	0.938888	2	0.40195	1.30901	1.30901e-05	Inf	0.918032	1	C/T/Y	0.501002	-0.783607	0	2	1	1	Distal Intergenic	1	1140491	1143641	3151	2	ENSSSCT00000086285.1	59716	ENSSSCG00000044353	ENSSSCG00000044353
chr1:1146119	chr1	1146119	S1_1146119	T	C	C	T	0.57143	0.42857	0	2	0.28571	T	0.5	0.375	C	2	12443.9	2.5823e-08	0.059988	0.0104338	0.923557	0.909973	2.40076	0.196204	5	0.999839	1.45149	1.45149e-05	13.0051	1.31662e-07	0.00234161	C/T/Y	-0.849985	-0.969961	0	3	2	2	Promoter (2-3kb)	1	1140491	1143641	3151	2	ENSSSCT00000086285.1	-2478	ENSSSCG00000044353	ENSSSCG00000044353
chr1:1171770	chr1	1171770	S1_1171770	C	T	T	C	0.57143	0.42857	0	2	0.28571	C	0.5	0.375	T	2	12443.9	2.5823e-08	-0.059988	0.0104338	0.923557	0.909973	2.40076	0.196204	5	0.999839	1.45149	1.45149e-05	13.0051	1.31662e-07	0.00234161	C/T/Y	-0.969961	-0.849985	0	2	3	2	Distal Intergenic	1	1165670	1167799	2130	2	ENSSSCT00000076287.1	-3971	ENSSSCG00000042085	ENSSSCG00000042085
chr1:1171814	chr1	1171814	S1_1171814	T	A	A	T	0.57143	0.42857	0	2	0.28571	T	0.5	0.375	A	2	12443.9	2.5823e-08	0.059988	0.0104338	0.923557	0.909973	2.40076	0.196204	5	0.999839	1.45149	1.45149e-05	13.0051	1.31662e-07	0.00234161	A/T/W	-0.849985	-0.969961	0	3	2	2	Distal Intergenic	1	1165670	1167799	2130	2	ENSSSCT00000076287.1	-4015	ENSSSCG00000042085	ENSSSCG00000042085
chr1:1176138	chr1	1176138	S1_1176138	C	T	T	C	0.57143	0.42857	0	2	0.28571	C	0.5	0.375	T	2	12443.9	2.5823e-08	-0.059988	0.0104338	0.923557	0.909973	2.40076	0.196204	5	0.999839	1.45149	1.45149e-05	13.0051	1.31662e-07	0.00234161	C/T/Y	-0.969961	-0.849985	0	2	3	2	Distal Intergenic	1	1165670	1167799	2130	2	ENSSSCT00000076287.1	-8339	ENSSSCG00000042085	ENSSSCG00000042085
chr1:1180834	chr1	1180834	S1_1180834	A	G	A	G	0.66667	0.33333	0.14286	2	0.33333	G	0.25	0.375	A	2	13351.9	1.19055e-06	-0.528637	0.473946	0.540637	0.321347	0.175126	0.703749	4	0.999888	1.35278	1.35278e-05	10.5396	5.6668e-06	0.107958	A/G/R	-0.849984	0.20729	0	3	1	2	Distal Intergenic	1	1186604	1188093	1490	1	ENSSSCT00000089528.1	-5770	ENSSSCG00000045916	ENSSSCG00000045916
chr1:1180847	chr1	1180847	S1_1180847	A	G	G	A	0.66667	0.33333	0.14286	2	0.33333	A	0.25	0.375	G	2	13351.9	1.19055e-06	0.528637	0.473946	0.540637	0.321347	0.175126	0.703749	4	0.999888	1.35278	1.35278e-05	10.5396	5.6668e-06	0.107958	A/G/R	0.20729	-0.849984	0	1	3	2	Distal Intergenic	1	1186604	1188093	1490	1	ENSSSCT00000089528.1	-5757	ENSSSCG00000045916	ENSSSCG00000045916
chr1:1190783	chr1	1190783	S1_1190783	G	C	C	G	0.5	0.5	0	3	0.42857	C	0.5	0.5	G	2	0.071929	0.931773	0.236344	0.0949142	0.773397	0.240365	0.0484636	0.836538	5	0.034716	1.38997	0.352318	12.6217	1	1	C/G/S	-0.00402194	-0.476709	0	2	2	3	Downstream (2-3kb)	1	1186604	1188093	1490	1	ENSSSCT00000089528.1	4179	ENSSSCG00000045916	ENSSSCG00000045916
chr1:1191402	chr1	1191402	S1_1191402	A	G	G	A	0.57143	0.42857	0	2	0.28571	A	0.5	0.375	G	2	12443.9	2.5823e-08	-0.059988	0.0104338	0.923557	0.909973	2.40076	0.196204	5	0.999839	1.45149	1.45149e-05	13.0051	1.31662e-07	0.00234161	A/G/R	-0.969961	-0.849985	0	2	3	2	Downstream (1-2kb)	1	1186604	1188093	1490	1	ENSSSCT00000089528.1	4798	ENSSSCG00000045916	ENSSSCG00000045916
chr1:1192343	chr1	1192343	S1_1192343	A	G	G	A	0.64286	0.35714	0	1	0.14286	A	0.5	0.25	G	2	0.286513	0.76509	-0.338407	0.308847	0.608006	-0.618559	0.180455	0.692837	5	0.125306	1.19169	0.351312	12.295	0.911583	1	A/G/R	0.280152	0.956966	0	2	4	1	Downstream (<1kb)	1	1186604	1188093	1490	1	ENSSSCT00000089528.1	5739	ENSSSCG00000045916	ENSSSCG00000045916
chr1:1192417	chr1	1192417	S1_1192417	C	T	T	C	0.57143	0.42857	0	2	0.28571	C	0.5	0.375	T	2	12443.9	2.5823e-08	-0.059988	0.0104338	0.923557	0.909973	2.40076	0.196204	5	0.999839	1.45149	1.45149e-05	13.0051	1.31662e-07	0.00234161	C/T/Y	-0.969961	-0.849985	0	2	3	2	Downstream (<1kb)	1	1186604	1188093	1490	1	ENSSSCT00000089528.1	5813	ENSSSCG00000045916	ENSSSCG00000045916
chr1:1199779	chr1	1199779	S1_1199779	C	A	A	C	0.5	0.5	0.14286	2	0.33333	A	0.5	0.5	C	2	0.16595	0.854366	0.232078	0.080753	0.794765	0.572619	0.250216	0.651313	4	0.000103525	1.85443	1.85443e-05	12.0842	0.963464	1	A/C/M	-0.340542	-0.804697	0	2	2	2	Intron (ENSSSCT00000088316.1/ENSSSCG00000004013.4, intron 10 of 13)	1	1186604	1188093	1490	1	ENSSSCT00000089528.1	13175	ENSSSCG00000045916	ENSSSCG00000045916
chr1:1200704	chr1	1200704	S1_1200704	C	G	C	G	0.66667	0.33333	0.14286	2	0.33333	G	0.5	0.1667	C	2	13352.3	1.19049e-06	0.535966	0.578209	0.502317	1.38595	3.86627	0.143967	4	0.999888	1.35278	1.35278e-05	10.5396	5.6668e-06	0.107953	C/G/S	-0.849984	-1.92192	0	3	1	2	Intron (ENSSSCT00000088316.1/ENSSSCG00000004013.4, intron 10 of 13)	1	1186604	1188093	1490	1	ENSSSCT00000089528.1	14100	ENSSSCG00000045916	ENSSSCG00000045916
chr1:1220458	chr1	1220458	S1_1220458	G	A	G	A	0.58333	0.41667	0.14286	3	0.5	A	0.3333	0.5	G	2	1.03706	0.454613	0.935	1.59493	0.295857	-0.994996	0.956214	0.400258	4	0.408764	1.46165e-05	1.46165	10.8688	0.769888	1	A/G/R	1.93	0.0599956	0	1	2	3	Intron (ENSSSCT00000088316.1/ENSSSCG00000004013.4, intron 8 of 13)	1	1186604	1188093	1490	1	ENSSSCT00000089528.1	33854	ENSSSCG00000045916	ENSSSCG00000045916
chr1:1220512	chr1	1220512	S1_1220512	G	A	G	A	0.58333	0.41667	0.14286	3	0.5	A	0.3333	0.5	G	2	1.03706	0.454613	0.935	1.59493	0.295857	-0.994996	0.956214	0.400258	4	0.408764	1.46165e-05	1.46165	10.8688	0.769888	1	A/G/R	1.93	0.0599956	0	1	2	3	Intron (ENSSSCT00000088316.1/ENSSSCG00000004013.4, intron 8 of 13)	1	1186604	1188093	1490	1	ENSSSCT00000089528.1	33908	ENSSSCG00000045916	ENSSSCG00000045916
chr1:1222867	chr1	1222867	S1_1222867	G	T	G	T	0.5	0.5	0.28571	1	0.2	T	0.5	0.5	G	2	0.0744918	0.930673	0.143322	0.0275235	0.883488	-0.680411	0.125926	0.756621	3	0.0691683	1.19059	1.55153	7.79884	1	1	G/T/K	0.823733	0.537089	0	2	2	1	Intron (ENSSSCT00000088316.1/ENSSSCG00000004013.4, intron 8 of 13)	1	1186604	1188093	1490	1	ENSSSCT00000089528.1	36263	ENSSSCG00000045916	ENSSSCG00000045916
chr1:1225018	chr1	1225018	S1_1225018	C	G	G	C	0.58333	0.41667	0.14286	1	0.16667	C	0.5	0.3333	G	2	0.163234	0.85646	-0.230794	0.151127	0.723409	-0.497117	0.125214	0.746855	4	0.0497088	1.38128	1.38128e-05	11.1513	0.964732	1	C/G/S	0.266322	0.727911	0	2	3	1	Intron (ENSSSCT00000088316.1/ENSSSCG00000004013.4, intron 8 of 13)	1	1186604	1188093	1490	1	ENSSSCT00000089528.1	38414	ENSSSCG00000045916	ENSSSCG00000045916
chr1:1225227	chr1	1225227	S1_1225227	C	T	C	T	0.5	0.5	0.14286	2	0.33333	T	0.5	0.5	C	2	0.16595	0.854366	-0.232078	0.080753	0.794765	0.572619	0.250216	0.651313	4	0.000103525	1.85443	1.85443e-05	12.0842	0.963464	1	C/T/Y	-0.804697	-0.340542	0	2	2	2	Intron (ENSSSCT00000088316.1/ENSSSCG00000004013.4, intron 8 of 13)	1	1186604	1188093	1490	1	ENSSSCT00000089528.1	38623	ENSSSCG00000045916	ENSSSCG00000045916
chr1:1239730	chr1	1239730	S1_1239730	C	T	C	T	0.5	0.5	0.14286	2	0.33333	C	0.5	0.5	T	2	0.16595	0.854366	0.232078	0.080753	0.794765	0.572619	0.250216	0.651313	4	0.000103525	1.85443	1.85443e-05	12.0842	0.963464	1	C/T/Y	-0.340542	-0.804697	0	2	2	2	Intron (ENSSSCT00000088316.1/ENSSSCG00000004013.4, intron 6 of 13)	1	1193163	1289333	96171	2	ENSSSCT00000088316.1	49603	ENSSSCG00000004013	ENSSSCG00000004013
chr1:1239740	chr1	1239740	S1_1239740	A	G	A	G	0.5	0.5	0.14286	2	0.33333	A	0.5	0.5	G	2	0.16595	0.854366	0.232078	0.080753	0.794765	0.572619	0.250216	0.651313	4	0.000103525	1.85443	1.85443e-05	12.0842	0.963464	1	A/G/R	-0.340542	-0.804697	0	2	2	2	Intron (ENSSSCT00000088316.1/ENSSSCG00000004013.4, intron 6 of 13)	1	1193163	1289333	96171	2	ENSSSCT00000088316.1	49593	ENSSSCG00000004013	ENSSSCG00000004013
chr1:1239915	chr1	1239915	S1_1239915	A	C	A	C	0.5	0.5	0.14286	2	0.33333	C	0.5	0.5	A	2	0.16595	0.854366	-0.232078	0.080753	0.794765	0.572619	0.250216	0.651313	4	0.000103525	1.85443	1.85443e-05	12.0842	0.963464	1	A/C/M	-0.804697	-0.340542	0	2	2	2	Intron (ENSSSCT00000088316.1/ENSSSCG00000004013.4, intron 6 of 13)	1	1193163	1289333	96171	2	ENSSSCT00000088316.1	49418	ENSSSCG00000004013	ENSSSCG00000004013
chr1:1251238	chr1	1251238	S1_1251238	G	C	C	G	0.57143	0.42857	0	2	0.28571	G	0.5	0.375	C	2	12443.9	2.5823e-08	0.059988	0.0104338	0.923557	0.909973	2.40076	0.196204	5	0.999839	1.45149	1.45149e-05	13.0051	1.31662e-07	0.00234161	C/G/S	-0.849985	-0.969961	0	3	2	2	Intron (ENSSSCT00000088316.1/ENSSSCG00000004013.4, intron 6 of 13)	1	1193163	1289333	96171	2	ENSSSCT00000088316.1	38095	ENSSSCG00000004013	ENSSSCG00000004013
chr1:1251578	chr1	1251578	S1_1251578	C	T	C	T	0.57143	0.42857	0	2	0.28571	T	0.5	0.375	C	2	12443.9	2.5823e-08	0.059988	0.0104338	0.923557	0.909973	2.40076	0.196204	5	0.999839	1.45149	1.45149e-05	13.0051	1.31662e-07	0.00234161	C/T/Y	-0.849985	-0.969961	0	3	2	2	Intron (ENSSSCT00000088316.1/ENSSSCG00000004013.4, intron 6 of 13)	1	1193163	1289333	96171	2	ENSSSCT00000088316.1	37755	ENSSSCG00000004013	ENSSSCG00000004013
chr1:1251609	chr1	1251609	S1_1251609	A	G	A	G	0.57143	0.42857	0	2	0.28571	G	0.5	0.375	A	2	12443.9	2.5823e-08	0.059988	0.0104338	0.923557	0.909973	2.40076	0.196204	5	0.999839	1.45149	1.45149e-05	13.0051	1.31662e-07	0.00234161	A/G/R	-0.849985	-0.969961	0	3	2	2	Intron (ENSSSCT00000088316.1/ENSSSCG00000004013.4, intron 6 of 13)	1	1193163	1289333	96171	2	ENSSSCT00000088316.1	37724	ENSSSCG00000004013	ENSSSCG00000004013
chr1:1251630	chr1	1251630	S1_1251630	A	G	G	A	0.57143	0.42857	0	2	0.28571	A	0.5	0.375	G	2	12443.9	2.5823e-08	-0.059988	0.0104338	0.923557	0.909973	2.40076	0.196204	5	0.999839	1.45149	1.45149e-05	13.0051	1.31662e-07	0.00234161	A/G/R	-0.969961	-0.849985	0	2	3	2	Intron (ENSSSCT00000088316.1/ENSSSCG00000004013.4, intron 6 of 13)	1	1193163	1289333	96171	2	ENSSSCT00000088316.1	37703	ENSSSCG00000004013	ENSSSCG00000004013
chr1:1251739	chr1	1251739	S1_1251739	C	T	C	T	0.5	0.5	0.14286	2	0.33333	T	0.5	0.5	C	2	0.16595	0.854366	-0.232078	0.080753	0.794765	0.572619	0.250216	0.651313	4	0.000103525	1.85443	1.85443e-05	12.0842	0.963464	1	C/T/Y	-0.804697	-0.340542	0	2	2	2	Intron (ENSSSCT00000088316.1/ENSSSCG00000004013.4, intron 6 of 13)	1	1193163	1289333	96171	2	ENSSSCT00000088316.1	37594	ENSSSCG00000004013	ENSSSCG00000004013
chr1:1252028	chr1	1252028	S1_1252028	A	G	G	A	0.57143	0.42857	0	2	0.28571	A	0.5	0.375	G	2	12443.9	2.5823e-08	-0.059988	0.0104338	0.923557	0.909973	2.40076	0.196204	5	0.999839	1.45149	1.45149e-05	13.0051	1.31662e-07	0.00234161	A/G/R	-0.969961	-0.849985	0	2	3	2	Intron (ENSSSCT00000088316.1/ENSSSCG00000004013.4, intron 6 of 13)	1	1193163	1289333	96171	2	ENSSSCT00000088316.1	37305	ENSSSCG00000004013	ENSSSCG00000004013
chr1:1289320	chr1	1289320	S1_1289320	G	A	A	G	0.5	0.5	0	1	0.14286	A	0.5	0.5	G	2	12394.1	2.60307e-08	-0.424991	24788	9.76226e-09	-0.736163	0.26659	0.63286	5	0.999839	1.45731	1.45731e-05	12.9252	1.3226e-07	0.00236044	A/G/R	0.311172	1.16115	0	3	3	1	Promoter (<=1kb)	1	1193163	1289333	96171	2	ENSSSCT00000088316.1	13	ENSSSCG00000004013	ENSSSCG00000004013
chr1:1294815	chr1	1294815	S1_1294815	A	G	A	G	0.75	0.25	0.14286	1	0.16667	G	0.25	0.25	A	2	0.337027	0.737842	-0.251106	0.110232	0.761724	-1.18315	0.668813	0.473376	4	0.18344	1.00872	0.358206	9.78999	0.898034	1	A/G/R	0.932044	1.43426	0	4	1	1	Promoter (1-2kb)	1	1193170	1296482	103313	2	ENSSSCT00000069935.1	1667	ENSSSCG00000004013	ENSSSCG00000004013
chr1:1297233	chr1	1297233	S1_1297233	G	A	G	A	0.64286	0.35714	0	3	0.42857	A	0.3333	0.375	G	2	0.31833	0.744234	0.423233	0.328294	0.597336	-0.742473	0.558238	0.496498	5	0.13731	0.448809	1.01976	12.9402	0.900455	1	A/G/R	1.16571	0.319241	0	1	3	3	Promoter (<=1kb)	1	1193170	1296482	103313	2	ENSSSCT00000069935.1	-751	ENSSSCG00000004013	ENSSSCG00000004013
chr1:1297403	chr1	1297403	S1_1297403	G	A	A	G	0.57143	0.42857	0	2	0.28571	G	0.5	0.375	A	2	12443.9	2.5823e-08	0.059988	0.0104338	0.923557	0.909973	2.40076	0.196204	5	0.999839	1.45149	1.45149e-05	13.0051	1.31662e-07	0.00234161	A/G/R	-0.849985	-0.969961	0	3	2	2	Promoter (<=1kb)	1	1193170	1296482	103313	2	ENSSSCT00000069935.1	-921	ENSSSCG00000004013	ENSSSCG00000004013
chr1:1297416	chr1	1297416	S1_1297416	A	G	A	G	0.64286	0.35714	0	3	0.42857	G	0.3333	0.375	A	2	0.31833	0.744234	-0.423233	0.328294	0.597336	-0.742473	0.558238	0.496498	5	0.13731	0.448809	1.01976	12.9402	0.900455	1	A/G/R	0.319241	1.16571	0	3	1	3	Promoter (<=1kb)	1	1193170	1296482	103313	2	ENSSSCT00000069935.1	-934	ENSSSCG00000004013	ENSSSCG00000004013
chr1:1297485	chr1	1297485	S1_1297485	C	T	T	C	0.57143	0.42857	0	2	0.28571	C	0.5	0.375	T	2	12443.9	2.5823e-08	-0.059988	0.0104338	0.923557	0.909973	2.40076	0.196204	5	0.999839	1.45149	1.45149e-05	13.0051	1.31662e-07	0.00234161	C/T/Y	-0.969961	-0.849985	0	2	3	2	Promoter (1-2kb)	1	1193170	1296482	103313	2	ENSSSCT00000069935.1	-1003	ENSSSCG00000004013	ENSSSCG00000004013
chr1:1334147	chr1	1334147	S1_1334147	A	G	A	G	0.5	0.5	0	3	0.42857	G	0.5	0.5	A	2	0.071929	0.931773	-0.236344	0.0949142	0.773397	0.240365	0.0484636	0.836538	5	0.034716	1.38997	0.352318	12.6217	1	1	A/G/R	-0.476709	-0.00402194	0	2	2	3	Promoter (1-2kb)	1	1193163	1333092	139930	2	ENSSSCT00000004437.4	-1055	ENSSSCG00000004013	ENSSSCG00000004013
chr1:1334152	chr1	1334152	S1_1334152	C	A	A	C	0.5	0.5	0	3	0.42857	A	0.5	0.5	C	2	0.071929	0.931773	0.236344	0.0949142	0.773397	0.240365	0.0484636	0.836538	5	0.034716	1.38997	0.352318	12.6217	1	1	A/C/M	-0.00402194	-0.476709	0	2	2	3	Promoter (1-2kb)	1	1193163	1333092	139930	2	ENSSSCT00000004437.4	-1060	ENSSSCG00000004013	ENSSSCG00000004013
chr1:1334216	chr1	1334216	S1_1334216	A	C	C	A	0.57143	0.42857	0	2	0.28571	A	0.5	0.375	C	2	12443.9	2.5823e-08	-0.059988	0.0104338	0.923557	0.909973	2.40076	0.196204	5	0.999839	1.45149	1.45149e-05	13.0051	1.31662e-07	0.00234161	A/C/M	-0.969961	-0.849985	0	2	3	2	Promoter (1-2kb)	1	1193163	1333092	139930	2	ENSSSCT00000004437.4	-1124	ENSSSCG00000004013	ENSSSCG00000004013
chr1:1334262	chr1	1334262	S1_1334262	T	C	C	T	0.5	0.5	0	3	0.42857	C	0.5	0.5	T	2	0.071929	0.931773	0.236344	0.0949142	0.773397	0.240365	0.0484636	0.836538	5	0.034716	1.38997	0.352318	12.6217	1	1	C/T/Y	-0.00402194	-0.476709	0	2	2	3	Promoter (1-2kb)	1	1193163	1333092	139930	2	ENSSSCT00000004437.4	-1170	ENSSSCG00000004013	ENSSSCG00000004013
chr1:1334348	chr1	1334348	S1_1334348	C	T	T	C	0.57143	0.42857	0	2	0.28571	C	0.5	0.375	T	2	12443.9	2.5823e-08	-0.059988	0.0104338	0.923557	0.909973	2.40076	0.196204	5	0.999839	1.45149	1.45149e-05	13.0051	1.31662e-07	0.00234161	C/T/Y	-0.969961	-0.849985	0	2	3	2	Promoter (1-2kb)	1	1193163	1333092	139930	2	ENSSSCT00000004437.4	-1256	ENSSSCG00000004013	ENSSSCG00000004013
chr1:1366273	chr1	1366273	S1_1366273	A	G	A	G	0.5	0.5	0	1	0.14286	A	0.5	0.5	G	2	17695.9	1.27707e-08	-0.424993	35390.1	4.78966e-09	-1.53368	1.6295	0.270848	5	0.999887	1.02074	1.02074e-05	11.4872	9.23104e-08	0.00115803	A/G/R	1.10869	1.95868	0	3	3	1	Distal Intergenic	1	1370736	1376033	5298	2	ENSSSCT00000076050.1	9760	ENSSSCG00000043714	ENSSSCG00000043714
chr1:1379264	chr1	1379264	S1_1379264	A	G	A	G	0.57143	0.42857	0	2	0.28571	G	0.5	0.375	A	2	12443.9	2.5823e-08	0.059988	0.0104338	0.923557	0.909973	2.40076	0.196204	5	0.999839	1.45149	1.45149e-05	13.0051	1.31662e-07	0.00234161	A/G/R	-0.849985	-0.969961	0	3	2	2	Distal Intergenic	1	1370736	1376033	5298	2	ENSSSCT00000076050.1	-3231	ENSSSCG00000043714	ENSSSCG00000043714
chr1:1379269	chr1	1379269	S1_1379269	C	T	T	C	0.57143	0.42857	0	2	0.28571	C	0.5	0.375	T	2	12443.9	2.5823e-08	-0.059988	0.0104338	0.923557	0.909973	2.40076	0.196204	5	0.999839	1.45149	1.45149e-05	13.0051	1.31662e-07	0.00234161	C/T/Y	-0.969961	-0.849985	0	2	3	2	Distal Intergenic	1	1370736	1376033	5298	2	ENSSSCT00000076050.1	-3236	ENSSSCG00000043714	ENSSSCG00000043714
chr1:1379302	chr1	1379302	S1_1379302	A	G	G	A	0.57143	0.42857	0	2	0.28571	A	0.5	0.375	G	2	12443.9	2.5823e-08	-0.059988	0.0104338	0.923557	0.909973	2.40076	0.196204	5	0.999839	1.45149	1.45149e-05	13.0051	1.31662e-07	0.00234161	A/G/R	-0.969961	-0.849985	0	2	3	2	Distal Intergenic	1	1370736	1376033	5298	2	ENSSSCT00000076050.1	-3269	ENSSSCG00000043714	ENSSSCG00000043714
chr1:1417475	chr1	1417475	S1_1417475	C	T	C	T	0.57143	0.42857	0	4	0.57143	T	0.3333	0.5	C	2	0.839852	0.495985	-0.95125	1.47858	0.290848	-0.801199	0.653026	0.46435	5	0.295738	0.820639	0.368955	11.291	0.781202	1	C/T/Y	-0.150051	1.75245	0	2	1	4	Intron (ENSSSCT00000050017.2/ENSSSCG00000031703.2, intron 1 of 3)	1	1413856	1424023	10168	1	ENSSSCT00000050017.2	3619	ENSSSCG00000031703	ENSSSCG00000031703
chr1:1417564	chr1	1417564	S1_1417564	A	G	A	G	0.5	0.5	0	1	0.14286	G	0.5	0.5	A	2	12394.1	2.60307e-08	0.424991	24788	9.76226e-09	-0.736163	0.26659	0.63286	5	0.999839	1.45731	1.45731e-05	12.9252	1.3226e-07	0.00236044	A/G/R	1.16115	0.311172	0	3	3	1	Intron (ENSSSCT00000050017.2/ENSSSCG00000031703.2, intron 1 of 3)	1	1413856	1424023	10168	1	ENSSSCT00000050017.2	3708	ENSSSCG00000031703	ENSSSCG00000031703
chr1:1421827	chr1	1421827	S1_1421827	A	G	A	G	0.5	0.5	0.14286	2	0.33333	A	0.75	0.375	G	2	0.0732553	0.930975	0.0546341	0.0074709	0.936567	0.285348	0.102844	0.769484	4	0.0465579	1.00803	0.51637	11.1634	1	1	A/G/R	-0.230714	-0.339982	0	2	2	2	Exon (ENSSSCT00000050017.2/ENSSSCG00000031703.2, exon 4 of 4)	1	1413856	1424023	10168	1	ENSSSCT00000050017.2	7971	ENSSSCG00000031703	ENSSSCG00000031703
chr1:1423570	chr1	1423570	S1_1423570	G	C	C	G	0.5	0.5	0	3	0.42857	C	0.5	0.5	G	2	0.099674	0.907311	0.331935	0.198952	0.678648	0.0219613	0.000382415	0.985335	5	0.0474712	1.35305	0.355902	12.5324	0.989835	1	C/G/S	0.309973	-0.353896	0	2	2	3	3' UTR	1	1432043	1432183	141	1	ENSSSCT00000081622.1	-8473	ENSSSCG00000044594	ENSSSCG00000044594
chr1:1423666	chr1	1423666	S1_1423666	C	T	C	T	0.57143	0.42857	0	4	0.57143	T	0.3333	0.5	C	2	0.839852	0.495985	-0.95125	1.47858	0.290848	-0.801199	0.653026	0.46435	5	0.295738	0.820639	0.368955	11.291	0.781202	1	C/T/Y	-0.150051	1.75245	0	2	1	4	3' UTR	1	1432043	1432183	141	1	ENSSSCT00000081622.1	-8377	ENSSSCG00000044594	ENSSSCG00000044594
chr1:1428983	chr1	1428983	S1_1428983	T	C	C	T	0.5	0.5	0	3	0.42857	C	0.5	0.5	T	2	0.071929	0.931773	0.236344	0.0949142	0.773397	0.240365	0.0484636	0.836538	5	0.034716	1.38997	0.352318	12.6217	1	1	C/T/Y	-0.00402194	-0.476709	0	2	2	3	Distal Intergenic	1	1432043	1432183	141	1	ENSSSCT00000081622.1	-3060	ENSSSCG00000044594	ENSSSCG00000044594
chr1:1429000	chr1	1429000	S1_1429000	C	T	C	T	0.5	0.5	0	3	0.42857	T	0.5	0.5	C	2	0.071929	0.931773	-0.236344	0.0949142	0.773397	0.240365	0.0484636	0.836538	5	0.034716	1.38997	0.352318	12.6217	1	1	C/T/Y	-0.476709	-0.00402194	0	2	2	3	Distal Intergenic	1	1432043	1432183	141	1	ENSSSCT00000081622.1	-3043	ENSSSCG00000044594	ENSSSCG00000044594
chr1:1429010	chr1	1429010	S1_1429010	T	C	C	T	0.5	0.5	0	3	0.42857	C	0.5	0.5	T	2	0.071929	0.931773	0.236344	0.0949142	0.773397	0.240365	0.0484636	0.836538	5	0.034716	1.38997	0.352318	12.6217	1	1	C/T/Y	-0.00402194	-0.476709	0	2	2	3	Distal Intergenic	1	1432043	1432183	141	1	ENSSSCT00000081622.1	-3033	ENSSSCG00000044594	ENSSSCG00000044594
chr1:1429017	chr1	1429017	S1_1429017	C	T	C	T	0.5	0.5	0	3	0.42857	T	0.5	0.5	C	2	0.071929	0.931773	-0.236344	0.0949142	0.773397	0.240365	0.0484636	0.836538	5	0.034716	1.38997	0.352318	12.6217	1	1	C/T/Y	-0.476709	-0.00402194	0	2	2	3	Distal Intergenic	1	1432043	1432183	141	1	ENSSSCT00000081622.1	-3026	ENSSSCG00000044594	ENSSSCG00000044594
chr1:1430296	chr1	1430296	S1_1430296	G	A	G	A	0.64286	0.35714	0	3	0.42857	A	0.3333	0.375	G	2	0.31833	0.744234	0.423233	0.328294	0.597336	-0.742473	0.558238	0.496498	5	0.13731	0.448809	1.01976	12.9402	0.900455	1	A/G/R	1.16571	0.319241	0	1	3	3	Promoter (1-2kb)	1	1432043	1432183	141	1	ENSSSCT00000081622.1	-1747	ENSSSCG00000044594	ENSSSCG00000044594
chr1:1444968	chr1	1444968	S1_1444968	T	C	C	T	0.5	0.5	0	3	0.42857	C	0.5	0.5	T	2	0.071929	0.931773	0.236344	0.0949142	0.773397	0.240365	0.0484636	0.836538	5	0.034716	1.38997	0.352318	12.6217	1	1	C/T/Y	-0.00402194	-0.476709	0	2	2	3	Distal Intergenic	1	1432043	1432183	141	1	ENSSSCT00000081622.1	12925	ENSSSCG00000044594	ENSSSCG00000044594
chr1:1444970	chr1	1444970	S1_1444970	C	A	C	A	0.57143	0.42857	0	4	0.57143	A	0.3333	0.5	C	2	0.254983	0.786636	0.375161	0.180885	0.692497	-0.753307	0.447425	0.540185	5	0.113075	1.19846	0.361344	12.202	0.926341	1	A/C/M	1.12847	0.378145	0	1	2	4	Distal Intergenic	1	1432043	1432183	141	1	ENSSSCT00000081622.1	12927	ENSSSCG00000044594	ENSSSCG00000044594
chr1:1444972	chr1	1444972	S1_1444972	A	G	A	G	0.57143	0.42857	0	4	0.57143	G	0.3333	0.5	A	2	0.254983	0.786636	-0.375161	0.180885	0.692497	-0.753307	0.447425	0.540185	5	0.113075	1.19846	0.361344	12.202	0.926341	1	A/G/R	0.378145	1.12847	0	2	1	4	Distal Intergenic	1	1432043	1432183	141	1	ENSSSCT00000081622.1	12929	ENSSSCG00000044594	ENSSSCG00000044594
chr1:1444980	chr1	1444980	S1_1444980	A	G	A	G	0.57143	0.42857	0	4	0.57143	G	0.3333	0.5	A	2	0.254983	0.786636	-0.375161	0.180885	0.692497	-0.753307	0.447425	0.540185	5	0.113075	1.19846	0.361344	12.202	0.926341	1	A/G/R	0.378145	1.12847	0	2	1	4	Distal Intergenic	1	1432043	1432183	141	1	ENSSSCT00000081622.1	12937	ENSSSCG00000044594	ENSSSCG00000044594
chr1:1449111	chr1	1449111	S1_1449111	T	C	C	T	0.5	0.5	0	3	0.42857	C	0.5	0.5	T	2	0.071929	0.931773	0.236344	0.0949142	0.773397	0.240365	0.0484636	0.836538	5	0.034716	1.38997	0.352318	12.6217	1	1	C/T/Y	-0.00402194	-0.476709	0	2	2	3	Distal Intergenic	1	1432043	1432183	141	1	ENSSSCT00000081622.1	17068	ENSSSCG00000044594	ENSSSCG00000044594
chr1:1449113	chr1	1449113	S1_1449113	G	C	C	G	0.5	0.5	0	3	0.42857	C	0.5	0.5	G	2	0.071929	0.931773	0.236344	0.0949142	0.773397	0.240365	0.0484636	0.836538	5	0.034716	1.38997	0.352318	12.6217	1	1	C/G/S	-0.00402194	-0.476709	0	2	2	3	Distal Intergenic	1	1432043	1432183	141	1	ENSSSCT00000081622.1	17070	ENSSSCG00000044594	ENSSSCG00000044594
chr1:1455402	chr1	1455402	S1_1455402	A	G	G	A	0.57143	0.42857	0	2	0.28571	A	0.5	0.375	G	2	12443.9	2.5823e-08	-0.059988	0.0104338	0.923557	0.909973	2.40076	0.196204	5	0.999839	1.45149	1.45149e-05	13.0051	1.31662e-07	0.00234161	A/G/R	-0.969961	-0.849985	0	2	3	2	Distal Intergenic	1	1432043	1432183	141	1	ENSSSCT00000081622.1	23359	ENSSSCG00000044594	ENSSSCG00000044594
chr1:1455434	chr1	1455434	S1_1455434	T	C	C	T	0.57143	0.42857	0	2	0.28571	T	0.5	0.375	C	2	12443.9	2.5823e-08	0.059988	0.0104338	0.923557	0.909973	2.40076	0.196204	5	0.999839	1.45149	1.45149e-05	13.0051	1.31662e-07	0.00234161	C/T/Y	-0.849985	-0.969961	0	3	2	2	Distal Intergenic	1	1432043	1432183	141	1	ENSSSCT00000081622.1	23391	ENSSSCG00000044594	ENSSSCG00000044594
chr1:1480928	chr1	1480928	S1_1480928	C	G	G	C	0.57143	0.42857	0	2	0.28571	C	0.5	0.375	G	2	12443.9	2.5823e-08	-0.059988	0.0104338	0.923557	0.909973	2.40076	0.196204	5	0.999839	1.45149	1.45149e-05	13.0051	1.31662e-07	0.00234161	C/G/S	-0.969961	-0.849985	0	2	3	2	Distal Intergenic	1	1503059	1507485	4427	2	ENSSSCT00000066656.1	26557	ENSSSCG00000048580	ENSSSCG00000048580
chr1:1481006	chr1	1481006	S1_1481006	C	T	C	T	0.71429	0.28571	0	2	0.28571	T	0.1667	0.375	C	2	14926.2	1.79492e-08	-0.641446	0.810305	0.418925	0.208545	0.0856475	0.784338	5	0.999866	1.21013	1.21013e-05	12.1145	1.02812e-07	0.00162761	C/T/Y	-0.849991	0.432901	0	4	1	2	Distal Intergenic	1	1503059	1507485	4427	2	ENSSSCT00000066656.1	26479	ENSSSCG00000048580	ENSSSCG00000048580
chr1:1503425	chr1	1503425	S1_1503425	C	T	T	C	0.57143	0.42857	0	2	0.28571	C	0.5	0.375	T	2	12443.9	2.5823e-08	-0.059988	0.0104338	0.923557	0.909973	2.40076	0.196204	5	0.999839	1.45149	1.45149e-05	13.0051	1.31662e-07	0.00234161	C/T/Y	-0.969961	-0.849985	0	2	3	2	Exon (ENSSSCT00000066656.1/ENSSSCG00000048580.1, exon 3 of 3)	1	1503059	1507485	4427	2	ENSSSCT00000066656.1	4060	ENSSSCG00000048580	ENSSSCG00000048580
chr1:1503469	chr1	1503469	S1_1503469	T	G	G	T	0.5	0.5	0	3	0.42857	G	0.5	0.5	T	2	0.071929	0.931773	0.236344	0.0949142	0.773397	0.240365	0.0484636	0.836538	5	0.034716	1.38997	0.352318	12.6217	1	1	G/T/K	-0.00402194	-0.476709	0	2	2	3	Exon (ENSSSCT00000066656.1/ENSSSCG00000048580.1, exon 3 of 3)	1	1503059	1507485	4427	2	ENSSSCT00000066656.1	4016	ENSSSCG00000048580	ENSSSCG00000048580
chr1:1503470	chr1	1503470	S1_1503470	T	G	G	T	0.57143	0.42857	0	2	0.28571	T	0.5	0.375	G	2	12443.9	2.5823e-08	0.059988	0.0104338	0.923557	0.909973	2.40076	0.196204	5	0.999839	1.45149	1.45149e-05	13.0051	1.31662e-07	0.00234161	G/T/K	-0.849985	-0.969961	0	3	2	2	Exon (ENSSSCT00000066656.1/ENSSSCG00000048580.1, exon 3 of 3)	1	1503059	1507485	4427	2	ENSSSCT00000066656.1	4015	ENSSSCG00000048580	ENSSSCG00000048580
chr1:1503488	chr1	1503488	S1_1503488	A	G	G	A	0.57143	0.42857	0	2	0.28571	A	0.5	0.375	G	2	12443.9	2.5823e-08	-0.059988	0.0104338	0.923557	0.909973	2.40076	0.196204	5	0.999839	1.45149	1.45149e-05	13.0051	1.31662e-07	0.00234161	A/G/R	-0.969961	-0.849985	0	2	3	2	Exon (ENSSSCT00000066656.1/ENSSSCG00000048580.1, exon 3 of 3)	1	1503059	1507485	4427	2	ENSSSCT00000066656.1	3997	ENSSSCG00000048580	ENSSSCG00000048580
chr1:1514972	chr1	1514972	S1_1514972	C	T	T	C	0.57143	0.42857	0	2	0.28571	C	0.5	0.375	T	2	12443.9	2.5823e-08	-0.059988	0.0104338	0.923557	0.909973	2.40076	0.196204	5	0.999839	1.45149	1.45149e-05	13.0051	1.31662e-07	0.00234161	C/T/Y	-0.969961	-0.849985	0	2	3	2	Intron (ENSSSCT00000027970.3/ENSSSCG00000004017.4, intron 4 of 11)	1	1509504	1521669	12166	1	ENSSSCT00000027970.3	5468	ENSSSCG00000004017	ENSSSCG00000004017
chr1:1517004	chr1	1517004	S1_1517004	A	G	A	G	0.7	0.3	0.28571	1	0.2	G	0	0.5	A	2	0.42595	0.701287	-0.462509	0.327159	0.625056	0.554605	0.202328	0.696899	3	0.28492	1.37998	1.37998e-05	6.89483	0.872885	1	A/G/R	-1.01711	-0.0920958	0	3	1	1	Exon (ENSSSCT00000027970.3/ENSSSCG00000004017.4, exon 9 of 12)	1	1523547	1525668	2122	1	ENSSSCT00000080142.1	-6543	ENSSSCG00000049642	ENSSSCG00000049642
chr1:1517877	chr1	1517877	S1_1517877	G	A	G	A	0.57143	0.42857	0	2	0.28571	A	0.5	0.375	G	2	12982.2	2.37261e-08	0.247332	0.1839	0.690128	0.602658	1.0918	0.355058	5	0.999846	1.39131	1.39131e-05	12.8295	1.27035e-07	0.00215146	A/G/R	-0.355326	-0.84999	0	2	3	2	Exon (ENSSSCT00000027970.3/ENSSSCG00000004017.4, exon 10 of 12)	1	1523547	1525668	2122	1	ENSSSCT00000080142.1	-5670	ENSSSCG00000049642	ENSSSCG00000049642
chr1:1517880	chr1	1517880	S1_1517880	A	T	A	T	0.57143	0.42857	0	2	0.28571	T	0.5	0.375	A	2	12982.2	2.37261e-08	-0.247332	0.1839	0.690128	0.602658	1.0918	0.355058	5	0.999846	1.39131	1.39131e-05	12.8295	1.27035e-07	0.00215146	A/T/W	-0.84999	-0.355326	0	3	2	2	Exon (ENSSSCT00000027970.3/ENSSSCG00000004017.4, exon 10 of 12)	1	1523547	1525668	2122	1	ENSSSCT00000080142.1	-5667	ENSSSCG00000049642	ENSSSCG00000049642
chr1:1518082	chr1	1518082	S1_1518082	G	A	A	G	0.57143	0.42857	0	2	0.28571	G	0.5	0.375	A	2	12443.9	2.5823e-08	0.059988	0.0104338	0.923557	0.909973	2.40076	0.196204	5	0.999839	1.45149	1.45149e-05	13.0051	1.31662e-07	0.00234161	A/G/R	-0.849985	-0.969961	0	3	2	2	Intron (ENSSSCT00000027970.3/ENSSSCG00000004017.4, intron 10 of 11)	1	1523547	1525668	2122	1	ENSSSCT00000080142.1	-5465	ENSSSCG00000049642	ENSSSCG00000049642
chr1:1528471	chr1	1528471	S1_1528471	G	A	A	G	0.5	0.5	0	3	0.42857	A	0.5	0.5	G	2	0.071929	0.931773	0.236344	0.0949142	0.773397	0.240365	0.0484636	0.836538	5	0.034716	1.38997	0.352318	12.6217	1	1	A/G/R	-0.00402194	-0.476709	0	2	2	3	Exon (ENSSSCT00000004441.4/ENSSSCG00000004016.4, exon 6 of 7)	1	1523547	1525668	2122	1	ENSSSCT00000080142.1	4924	ENSSSCG00000049642	ENSSSCG00000049642
chr1:1528482	chr1	1528482	S1_1528482	G	A	A	G	0.5	0.5	0	3	0.42857	A	0.5	0.5	G	2	0.071929	0.931773	0.236344	0.0949142	0.773397	0.240365	0.0484636	0.836538	5	0.034716	1.38997	0.352318	12.6217	1	1	A/G/R	-0.00402194	-0.476709	0	2	2	3	Exon (ENSSSCT00000004441.4/ENSSSCG00000004016.4, exon 6 of 7)	1	1523547	1525668	2122	1	ENSSSCT00000080142.1	4935	ENSSSCG00000049642	ENSSSCG00000049642
chr1:1528491	chr1	1528491	S1_1528491	A	C	A	C	0.5	0.5	0	3	0.42857	C	0.5	0.5	A	2	0.071929	0.931773	-0.236344	0.0949142	0.773397	0.240365	0.0484636	0.836538	5	0.034716	1.38997	0.352318	12.6217	1	1	A/C/M	-0.476709	-0.00402194	0	2	2	3	Exon (ENSSSCT00000004441.4/ENSSSCG00000004016.4, exon 6 of 7)	1	1523547	1525668	2122	1	ENSSSCT00000080142.1	4944	ENSSSCG00000049642	ENSSSCG00000049642
chr1:1528497	chr1	1528497	S1_1528497	G	A	A	G	0.5	0.5	0	3	0.42857	A	0.5	0.5	G	2	0.071929	0.931773	0.236344	0.0949142	0.773397	0.240365	0.0484636	0.836538	5	0.034716	1.38997	0.352318	12.6217	1	1	A/G/R	-0.00402194	-0.476709	0	2	2	3	Exon (ENSSSCT00000004441.4/ENSSSCG00000004016.4, exon 6 of 7)	1	1523547	1525668	2122	1	ENSSSCT00000080142.1	4950	ENSSSCG00000049642	ENSSSCG00000049642
chr1:1528544	chr1	1528544	S1_1528544	C	T	C	T	0.57143	0.42857	0	2	0.28571	T	0.5	0.375	C	2	12443.9	2.5823e-08	0.059988	0.0104338	0.923557	0.909973	2.40076	0.196204	5	0.999839	1.45149	1.45149e-05	13.0051	1.31662e-07	0.00234161	C/T/Y	-0.849985	-0.969961	0	3	2	2	Exon (ENSSSCT00000004441.4/ENSSSCG00000004016.4, exon 6 of 7)	1	1523547	1525668	2122	1	ENSSSCT00000080142.1	4997	ENSSSCG00000049642	ENSSSCG00000049642
chr1:1528557	chr1	1528557	S1_1528557	A	G	G	A	0.57143	0.42857	0	2	0.28571	A	0.5	0.375	G	2	12443.9	2.5823e-08	-0.059988	0.0104338	0.923557	0.909973	2.40076	0.196204	5	0.999839	1.45149	1.45149e-05	13.0051	1.31662e-07	0.00234161	A/G/R	-0.969961	-0.849985	0	2	3	2	Intron (ENSSSCT00000004441.4/ENSSSCG00000004016.4, intron 5 of 6)	1	1523547	1525668	2122	1	ENSSSCT00000080142.1	5010	ENSSSCG00000049642	ENSSSCG00000049642
chr1:1528558	chr1	1528558	S1_1528558	G	T	G	T	0.57143	0.42857	0	2	0.28571	T	0.5	0.375	G	2	12443.9	2.5823e-08	0.059988	0.0104338	0.923557	0.909973	2.40076	0.196204	5	0.999839	1.45149	1.45149e-05	13.0051	1.31662e-07	0.00234161	G/T/K	-0.849985	-0.969961	0	3	2	2	Intron (ENSSSCT00000004441.4/ENSSSCG00000004016.4, intron 5 of 6)	1	1523547	1525668	2122	1	ENSSSCT00000080142.1	5011	ENSSSCG00000049642	ENSSSCG00000049642
chr1:1528561	chr1	1528561	S1_1528561	A	G	G	A	0.57143	0.42857	0	2	0.28571	A	0.5	0.375	G	2	12443.9	2.5823e-08	-0.059988	0.0104338	0.923557	0.909973	2.40076	0.196204	5	0.999839	1.45149	1.45149e-05	13.0051	1.31662e-07	0.00234161	A/G/R	-0.969961	-0.849985	0	2	3	2	Intron (ENSSSCT00000004441.4/ENSSSCG00000004016.4, intron 5 of 6)	1	1523547	1525668	2122	1	ENSSSCT00000080142.1	5014	ENSSSCG00000049642	ENSSSCG00000049642
chr1:1538420	chr1	1538420	S1_1538420	A	C	A	C	0.5	0.5	0.28571	1	0.2	C	0.75	0.3333	A	2	0.599987	0.625005	0.356617	0.380096	0.600378	-1.10959	0.68996	0.493547	3	0.35768	1.22988	1.22988e-05	6.50999	0.845735	1	A/C/M	1.46621	0.752976	0	2	2	1	Promoter (<=1kb)	1	1527530	1537814	10285	2	ENSSSCT00000004441.4	-606	ENSSSCG00000004016	ENSSSCG00000004016
chr1:1538421	chr1	1538421	S1_1538421	A	T	A	T	0.5	0.5	0.28571	1	0.2	T	0.75	0.3333	A	2	0.599987	0.625005	0.356617	0.380096	0.600378	-1.10959	0.68996	0.493547	3	0.35768	1.22988	1.22988e-05	6.50999	0.845735	1	A/T/W	1.46621	0.752976	0	2	2	1	Promoter (<=1kb)	1	1527530	1537814	10285	2	ENSSSCT00000004441.4	-607	ENSSSCG00000004016	ENSSSCG00000004016
chr1:1560252	chr1	1560252	S1_1560252	G	A	G	A	0.75	0.25	0.14286	1	0.16667	A	0.3333	0.1667	G	2	19441.8	6.77613e-07	-0.62286	1.13699	0.364487	1.47286	6.35742	0.0860714	4	0.999923	0.9291	9.291e-06	9.81801	3.29694e-06	0.0614453	A/G/R	-2.09572	-0.850002	0	1	4	1	Distal Intergenic	1	1527530	1537814	10285	2	ENSSSCT00000004441.4	-22438	ENSSSCG00000004016	ENSSSCG00000004016
chr1:1560271	chr1	1560271	S1_1560271	C	T	C	T	0.75	0.25	0.14286	1	0.16667	T	0.3333	0.1667	C	2	19441.8	6.77613e-07	0.62286	1.13699	0.364487	1.47286	6.35742	0.0860714	4	0.999923	0.9291	9.291e-06	9.81801	3.29694e-06	0.0614453	C/T/Y	-0.850002	-2.09572	0	4	1	1	Distal Intergenic	1	1527530	1537814	10285	2	ENSSSCT00000004441.4	-22457	ENSSSCG00000004016	ENSSSCG00000004016
chr1:1560272	chr1	1560272	S1_1560272	A	G	A	G	0.75	0.25	0.14286	1	0.16667	G	0.3333	0.1667	A	2	19441.8	6.77613e-07	0.62286	1.13699	0.364487	1.47286	6.35742	0.0860714	4	0.999923	0.9291	9.291e-06	9.81801	3.29694e-06	0.0614453	A/G/R	-0.850002	-2.09572	0	4	1	1	Distal Intergenic	1	1527530	1537814	10285	2	ENSSSCT00000004441.4	-22458	ENSSSCG00000004016	ENSSSCG00000004016
chr1:1566790	chr1	1566790	S1_1566790	C	A	C	A	0.78571	0.21429	0	1	0.14286	A	0.3333	0.125	C	2	22494.2	7.90387e-09	-0.69917	1.72184	0.259689	1.54917	8.45293	0.0437924	5	0.999911	0.803027	8.03027e-06	11.1154	7.34443e-08	0.000716715	A/C/M	-2.24834	-0.85	0	1	5	1	Downstream (2-3kb)	1	1527530	1537814	10285	2	ENSSSCT00000004441.4	-28976	ENSSSCG00000004016	ENSSSCG00000004016
chr1:1566798	chr1	1566798	S1_1566798	T	C	C	T	0.57143	0.42857	0	2	0.28571	T	0.5	0.375	C	2	12443.9	2.5823e-08	0.059988	0.0104338	0.923557	0.909973	2.40076	0.196204	5	0.999839	1.45149	1.45149e-05	13.0051	1.31662e-07	0.00234161	C/T/Y	-0.849985	-0.969961	0	3	2	2	Downstream (2-3kb)	1	1527530	1537814	10285	2	ENSSSCT00000004441.4	-28984	ENSSSCG00000004016	ENSSSCG00000004016
chr1:1631917	chr1	1631917	S1_1631917	A	G	A	G	0.5	0.5	0.28571	1	0.2	G	0.75	0.3333	A	2	0.599987	0.625005	0.356617	0.380096	0.600378	-1.10959	0.68996	0.493547	3	0.35768	1.22988	1.22988e-05	6.50999	0.845735	1	A/G/R	1.46621	0.752976	0	2	2	1	Intron (ENSSSCT00000039396.2/ENSSSCG00000004018.4, intron 8 of 34)	1	1584012	1664764	80753	2	ENSSSCT00000051253.2	32847	ENSSSCG00000004018	ENSSSCG00000004018
chr1:1631937	chr1	1631937	S1_1631937	C	A	A	C	0.5	0.5	0.28571	1	0.2	A	0.75	0.3333	C	2	0.599987	0.625005	-0.356617	0.380096	0.600378	-1.10959	0.68996	0.493547	3	0.35768	1.22988	1.22988e-05	6.50999	0.845735	1	A/C/M	0.752976	1.46621	0	2	2	1	Intron (ENSSSCT00000039396.2/ENSSSCG00000004018.4, intron 8 of 34)	1	1584012	1664764	80753	2	ENSSSCT00000051253.2	32827	ENSSSCG00000004018	ENSSSCG00000004018
chr1:1632062	chr1	1632062	S1_1632062	C	T	C	T	0.6	0.4	0.28571	2	0.4	T	0.25	0.5	C	2	0.0587874	0.944477	-0.341867	0.116867	0.765037	-0.0974696	0.00538159	0.948197	3	0.0529596	1.85853	1.85853e-05	7.15196	1	1	C/T/Y	-0.244397	0.439336	0	2	1	2	Intron (ENSSSCT00000039396.2/ENSSSCG00000004018.4, intron 8 of 34)	1	1584012	1664764	80753	2	ENSSSCT00000051253.2	32702	ENSSSCG00000004018	ENSSSCG00000004018
chr1:1635290	chr1	1635290	S1_1635290	G	A	G	A	0.78571	0.21429	0	1	0.14286	A	0.1667	0.25	G	2	0.296473	0.758468	0.447312	0.325841	0.598657	-1.04616	0.468006	0.531483	5	0.129099	1.17082	0.357967	12.2356	0.907916	1	A/G/R	1.49347	0.598844	0	1	5	1	Intron (ENSSSCT00000039396.2/ENSSSCG00000004018.4, intron 6 of 34)	1	1584012	1664764	80753	2	ENSSSCT00000051253.2	29474	ENSSSCG00000004018	ENSSSCG00000004018
chr1:1637845	chr1	1637845	S1_1637845	C	T	C	T	0.57143	0.42857	0	2	0.28571	T	0.5	0.375	C	2	12443.9	2.5823e-08	0.059988	0.0104338	0.923557	0.909973	2.40076	0.196204	5	0.999839	1.45149	1.45149e-05	13.0051	1.31662e-07	0.00234161	C/T/Y	-0.849985	-0.969961	0	3	2	2	Intron (ENSSSCT00000039396.2/ENSSSCG00000004018.4, intron 6 of 34)	1	1584012	1664764	80753	2	ENSSSCT00000051253.2	26919	ENSSSCG00000004018	ENSSSCG00000004018
chr1:1666075	chr1	1666075	S1_1666075	T	C	C	T	0.57143	0.42857	0	2	0.28571	T	0.5	0.375	C	2	12443.9	2.5823e-08	0.059988	0.0104338	0.923557	0.909973	2.40076	0.196204	5	0.999839	1.45149	1.45149e-05	13.0051	1.31662e-07	0.00234161	C/T/Y	-0.849985	-0.969961	0	3	2	2	Promoter (<=1kb)	1	1665568	1665643	76	2	ENSSSCT00000036831.1	-432	ENSSSCG00000038097	ENSSSCG00000038097
chr1:1745955	chr1	1745955	S1_1745955	C	T	C	T	0.57143	0.42857	0	2	0.28571	T	0.5	0.375	C	2	12443.9	2.5823e-08	0.059988	0.0104338	0.923557	0.909973	2.40076	0.196204	5	0.999839	1.45149	1.45149e-05	13.0051	1.31662e-07	0.00234161	C/T/Y	-0.849985	-0.969961	0	3	2	2	Distal Intergenic	1	1753351	1756928	3578	1	ENSSSCT00000078584.1	-7396	ENSSSCG00000051018	ENSSSCG00000051018
chr1:1745956	chr1	1745956	S1_1745956	A	G	A	G	0.57143	0.42857	0	2	0.28571	G	0.5	0.375	A	2	12443.9	2.5823e-08	0.059988	0.0104338	0.923557	0.909973	2.40076	0.196204	5	0.999839	1.45149	1.45149e-05	13.0051	1.31662e-07	0.00234161	A/G/R	-0.849985	-0.969961	0	3	2	2	Distal Intergenic	1	1753351	1756928	3578	1	ENSSSCT00000078584.1	-7395	ENSSSCG00000051018	ENSSSCG00000051018
chr1:1745976	chr1	1745976	S1_1745976	A	T	T	A	0.57143	0.42857	0	2	0.28571	A	0.5	0.375	T	2	12443.9	2.5823e-08	-0.059988	0.0104338	0.923557	0.909973	2.40076	0.196204	5	0.999839	1.45149	1.45149e-05	13.0051	1.31662e-07	0.00234161	A/T/W	-0.969961	-0.849985	0	2	3	2	Distal Intergenic	1	1753351	1756928	3578	1	ENSSSCT00000078584.1	-7375	ENSSSCG00000051018	ENSSSCG00000051018
chr1:1745980	chr1	1745980	S1_1745980	G	A	A	G	0.5	0.5	0	3	0.42857	A	0.5	0.5	G	2	0.071929	0.931773	0.236344	0.0949142	0.773397	0.240365	0.0484636	0.836538	5	0.034716	1.38997	0.352318	12.6217	1	1	A/G/R	-0.00402194	-0.476709	0	2	2	3	Distal Intergenic	1	1753351	1756928	3578	1	ENSSSCT00000078584.1	-7371	ENSSSCG00000051018	ENSSSCG00000051018
chr1:1746041	chr1	1746041	S1_1746041	C	T	C	T	0.57143	0.42857	0	2	0.28571	T	0.5	0.375	C	2	12443.9	2.5823e-08	0.059988	0.0104338	0.923557	0.909973	2.40076	0.196204	5	0.999839	1.45149	1.45149e-05	13.0051	1.31662e-07	0.00234161	C/T/Y	-0.849985	-0.969961	0	3	2	2	Distal Intergenic	1	1753351	1756928	3578	1	ENSSSCT00000078584.1	-7310	ENSSSCG00000051018	ENSSSCG00000051018
chr1:1746294	chr1	1746294	S1_1746294	T	G	G	T	0.57143	0.42857	0	2	0.28571	T	0.5	0.375	G	2	12443.9	2.5823e-08	0.059988	0.0104338	0.923557	0.909973	2.40076	0.196204	5	0.999839	1.45149	1.45149e-05	13.0051	1.31662e-07	0.00234161	G/T/K	-0.849985	-0.969961	0	3	2	2	Distal Intergenic	1	1753351	1756928	3578	1	ENSSSCT00000078584.1	-7057	ENSSSCG00000051018	ENSSSCG00000051018
chr1:1746387	chr1	1746387	S1_1746387	C	T	C	T	0.57143	0.42857	0	2	0.28571	T	0.5	0.375	C	2	12443.9	2.5823e-08	0.059988	0.0104338	0.923557	0.909973	2.40076	0.196204	5	0.999839	1.45149	1.45149e-05	13.0051	1.31662e-07	0.00234161	C/T/Y	-0.849985	-0.969961	0	3	2	2	Distal Intergenic	1	1753351	1756928	3578	1	ENSSSCT00000078584.1	-6964	ENSSSCG00000051018	ENSSSCG00000051018
chr1:1746416	chr1	1746416	S1_1746416	A	G	G	A	0.57143	0.42857	0	2	0.28571	A	0.5	0.375	G	2	12443.9	2.5823e-08	-0.059988	0.0104338	0.923557	0.909973	2.40076	0.196204	5	0.999839	1.45149	1.45149e-05	13.0051	1.31662e-07	0.00234161	A/G/R	-0.969961	-0.849985	0	2	3	2	Distal Intergenic	1	1753351	1756928	3578	1	ENSSSCT00000078584.1	-6935	ENSSSCG00000051018	ENSSSCG00000051018
chr1:1749213	chr1	1749213	S1_1749213	C	T	C	T	0.57143	0.42857	0	2	0.28571	T	0.5	0.375	C	2	12443.9	2.5823e-08	0.059988	0.0104338	0.923557	0.909973	2.40076	0.196204	5	0.999839	1.45149	1.45149e-05	13.0051	1.31662e-07	0.00234161	C/T/Y	-0.849985	-0.969961	0	3	2	2	Distal Intergenic	1	1753351	1756928	3578	1	ENSSSCT00000078584.1	-4138	ENSSSCG00000051018	ENSSSCG00000051018
chr1:1749329	chr1	1749329	S1_1749329	T	C	C	T	0.58333	0.41667	0.14286	1	0.16667	T	0.5	0.3333	C	2	0.457831	0.670616	0.475416	0.561336	0.508119	-0.70984	0.223481	0.668665	4	0.00024303	1.57797	1.57797e-05	11.5507	0.867529	1	C/T/Y	1.18526	0.234424	0	3	2	1	Distal Intergenic	1	1753351	1756928	3578	1	ENSSSCT00000078584.1	-4022	ENSSSCG00000051018	ENSSSCG00000051018
chr1:1758152	chr1	1758152	S1_1758152	G	A	G	A	0.57143	0.42857	0	2	0.28571	A	0.5	0.375	G	2	12443.9	2.5823e-08	-0.059988	0.0104338	0.923557	0.909973	2.40076	0.196204	5	0.999839	1.45149	1.45149e-05	13.0051	1.31662e-07	0.00234161	A/G/R	-0.969961	-0.849985	0	2	3	2	Promoter (<=1kb)	1	1758060	1771028	12969	1	ENSSSCT00000091176.1	92	ENSSSCG00000049134	ENSSSCG00000049134
chr1:1758186	chr1	1758186	S1_1758186	A	G	A	G	0.57143	0.42857	0	2	0.28571	G	0.5	0.375	A	2	12443.9	2.5823e-08	0.059988	0.0104338	0.923557	0.909973	2.40076	0.196204	5	0.999839	1.45149	1.45149e-05	13.0051	1.31662e-07	0.00234161	A/G/R	-0.849985	-0.969961	0	3	2	2	Promoter (<=1kb)	1	1758060	1771028	12969	1	ENSSSCT00000091176.1	126	ENSSSCG00000049134	ENSSSCG00000049134
chr1:1762957	chr1	1762957	S1_1762957	G	A	G	A	0.64286	0.35714	0	1	0.14286	A	0.5	0.25	G	2	0.286513	0.76509	-0.338407	0.308847	0.608006	-0.618559	0.180455	0.692837	5	0.125306	1.19169	0.351312	12.295	0.911583	1	A/G/R	0.280152	0.956966	0	2	4	1	Exon (ENSSSCT00000086080.1/ENSSSCG00000045280.1, exon 2 of 2)	1	1758060	1771028	12969	1	ENSSSCT00000091176.1	4897	ENSSSCG00000049134	ENSSSCG00000049134
chr1:1775592	chr1	1775592	S1_1775592	C	T	C	T	0.57143	0.42857	0	2	0.28571	T	0.5	0.375	C	2	12443.9	2.5823e-08	0.059988	0.0104338	0.923557	0.909973	2.40076	0.196204	5	0.999839	1.45149	1.45149e-05	13.0051	1.31662e-07	0.00234161	C/T/Y	-0.849985	-0.969961	0	3	2	2	Distal Intergenic	1	1762364	1767873	5510	2	ENSSSCT00000086080.1	-7719	ENSSSCG00000045280	ENSSSCG00000045280
chr1:1775596	chr1	1775596	S1_1775596	A	G	G	A	0.57143	0.42857	0	2	0.28571	A	0.5	0.375	G	2	12443.9	2.5823e-08	-0.059988	0.0104338	0.923557	0.909973	2.40076	0.196204	5	0.999839	1.45149	1.45149e-05	13.0051	1.31662e-07	0.00234161	A/G/R	-0.969961	-0.849985	0	2	3	2	Distal Intergenic	1	1762364	1767873	5510	2	ENSSSCT00000086080.1	-7723	ENSSSCG00000045280	ENSSSCG00000045280
chr1:1775617	chr1	1775617	S1_1775617	A	G	G	A	0.57143	0.42857	0	2	0.28571	A	0.5	0.375	G	2	12443.9	2.5823e-08	-0.059988	0.0104338	0.923557	0.909973	2.40076	0.196204	5	0.999839	1.45149	1.45149e-05	13.0051	1.31662e-07	0.00234161	A/G/R	-0.969961	-0.849985	0	2	3	2	Distal Intergenic	1	1762364	1767873	5510	2	ENSSSCT00000086080.1	-7744	ENSSSCG00000045280	ENSSSCG00000045280
chr1:1781498	chr1	1781498	S1_1781498	T	C	C	T	0.57143	0.42857	0	2	0.28571	T	0.5	0.375	C	2	12443.9	2.5823e-08	0.059988	0.0104338	0.923557	0.909973	2.40076	0.196204	5	0.999839	1.45149	1.45149e-05	13.0051	1.31662e-07	0.00234161	C/T/Y	-0.849985	-0.969961	0	3	2	2	Distal Intergenic	1	1762364	1767873	5510	2	ENSSSCT00000086080.1	-13625	ENSSSCG00000045280	ENSSSCG00000045280
chr1:1781679	chr1	1781679	S1_1781679	G	T	T	G	0.57143	0.42857	0	2	0.28571	G	0.5	0.375	T	2	12443.9	2.5823e-08	-0.059988	0.0104338	0.923557	0.909973	2.40076	0.196204	5	0.999839	1.45149	1.45149e-05	13.0051	1.31662e-07	0.00234161	G/T/K	-0.969961	-0.849985	0	2	3	2	Distal Intergenic	1	1762364	1767873	5510	2	ENSSSCT00000086080.1	-13806	ENSSSCG00000045280	ENSSSCG00000045280
chr1:1788286	chr1	1788286	S1_1788286	A	G	G	A	0.57143	0.42857	0	2	0.28571	A	0.5	0.375	G	2	12443.9	2.5823e-08	-0.059988	0.0104338	0.923557	0.909973	2.40076	0.196204	5	0.999839	1.45149	1.45149e-05	13.0051	1.31662e-07	0.00234161	A/G/R	-0.969961	-0.849985	0	2	3	2	Distal Intergenic	1	1762364	1767873	5510	2	ENSSSCT00000086080.1	-20413	ENSSSCG00000045280	ENSSSCG00000045280
chr1:1788379	chr1	1788379	S1_1788379	T	C	C	T	0.5	0.5	0	3	0.42857	C	0.3333	0.625	T	2	0.541228	0.619402	0.507497	0.704773	0.44843	-0.567491	0.37768	0.572084	5	0.212979	1.46175e-05	1.46175	12.8701	0.842568	1	C/T/Y	1.07499	0.0599936	0	2	2	3	Distal Intergenic	1	1762364	1767873	5510	2	ENSSSCT00000086080.1	-20506	ENSSSCG00000045280	ENSSSCG00000045280
chr1:1809974	chr1	1809974	S1_1809974	C	T	C	T	0.64286	0.35714	0	3	0.42857	T	0.1667	0.5	C	2	0.969803	0.453529	-1.0022	1.93955	0.236136	-0.585642	0.347485	0.587226	5	0.326555	0.772355	0.361994	11.1567	0.769888	1	C/T/Y	-0.416555	1.58784	0	3	1	3	Distal Intergenic	1	1816642	1835077	18436	1	ENSSSCT00000067997.1	-6668	ENSSSCG00000043317	ENSSSCG00000043317
chr1:1809978	chr1	1809978	S1_1809978	G	A	G	A	0.64286	0.35714	0	3	0.42857	A	0.1667	0.5	G	2	0.969803	0.453529	1.0022	1.93955	0.236136	-0.585642	0.347485	0.587226	5	0.326555	0.772355	0.361994	11.1567	0.769888	1	A/G/R	1.58784	-0.416555	0	1	3	3	Distal Intergenic	1	1816642	1835077	18436	1	ENSSSCT00000067997.1	-6664	ENSSSCG00000043317	ENSSSCG00000043317
chr1:1832510	chr1	1832510	S1_1832510	G	A	G	A	0.78571	0.21429	0	1	0.14286	A	0.1667	0.25	G	2	0.296473	0.758468	0.447312	0.325841	0.598657	-1.04616	0.468006	0.531483	5	0.129099	1.17082	0.357967	12.2356	0.907916	1	A/G/R	1.49347	0.598844	0	1	5	1	Promoter (1-2kb)	1	1830869	1835060	4192	1	ENSSSCT00000074506.1	1641	ENSSSCG00000043317	ENSSSCG00000043317
chr1:1832512	chr1	1832512	S1_1832512	C	T	C	T	0.78571	0.21429	0	1	0.14286	T	0.1667	0.25	C	2	0.296473	0.758468	-0.447312	0.325841	0.598657	-1.04616	0.468006	0.531483	5	0.129099	1.17082	0.357967	12.2356	0.907916	1	C/T/Y	0.598844	1.49347	0	5	1	1	Promoter (1-2kb)	1	1830869	1835060	4192	1	ENSSSCT00000074506.1	1643	ENSSSCG00000043317	ENSSSCG00000043317
chr1:1837636	chr1	1837636	S1_1837636	A	G	A	G	0.5	0.5	0	3	0.42857	G	0.3333	0.625	A	2	0.541228	0.619402	-0.507497	0.704773	0.44843	-0.567491	0.37768	0.572084	5	0.212979	1.46175e-05	1.46175	12.8701	0.842568	1	A/G/R	0.0599936	1.07499	0	2	2	3	Distal Intergenic	1	1830869	1835060	4192	1	ENSSSCT00000074506.1	6767	ENSSSCG00000043317	ENSSSCG00000043317
chr1:1841056	chr1	1841056	S1_1841056	A	C	A	C	0.78571	0.21429	0	1	0.14286	C	0.5	0	A	2	2.31323	0.215008	0.905855	3.20729	0.147797	-0.552511	0.269918	0.630811	5	0.536311	0.414278	0.353276	10.0829	0.526111	1	A/C/M	1.45837	-0.353344	0	5	1	1	Distal Intergenic	1	1830869	1835060	4192	1	ENSSSCT00000074506.1	10187	ENSSSCG00000043317	ENSSSCG00000043317
chr1:1841107	chr1	1841107	S1_1841107	T	C	C	T	0.5	0.5	0	3	0.42857	C	0.3333	0.625	T	2	0.541228	0.619402	0.507497	0.704773	0.44843	-0.567491	0.37768	0.572084	5	0.212979	1.46175e-05	1.46175	12.8701	0.842568	1	C/T/Y	1.07499	0.0599936	0	2	2	3	Distal Intergenic	1	1830869	1835060	4192	1	ENSSSCT00000074506.1	10238	ENSSSCG00000043317	ENSSSCG00000043317
chr1:1841112	chr1	1841112	S1_1841112	A	G	G	A	0.57143	0.42857	0	2	0.28571	A	0.5	0.375	G	2	12443.9	2.5823e-08	-0.059988	0.0104338	0.923557	0.909973	2.40076	0.196204	5	0.999839	1.45149	1.45149e-05	13.0051	1.31662e-07	0.00234161	A/G/R	-0.969961	-0.849985	0	2	3	2	Distal Intergenic	1	1830869	1835060	4192	1	ENSSSCT00000074506.1	10243	ENSSSCG00000043317	ENSSSCG00000043317
chr1:1846771	chr1	1846771	S1_1846771	G	T	G	T	0.57143	0.42857	0	4	0.57143	T	0.3333	0.5	G	2	0.839852	0.495985	-0.95125	1.47858	0.290848	-0.801199	0.653026	0.46435	5	0.295738	0.820639	0.368955	11.291	0.781202	1	G/T/K	-0.150051	1.75245	0	2	1	4	Distal Intergenic	1	1830869	1835060	4192	1	ENSSSCT00000074506.1	15902	ENSSSCG00000043317	ENSSSCG00000043317
chr1:1846773	chr1	1846773	S1_1846773	T	A	T	A	0.57143	0.42857	0	4	0.57143	A	0.3333	0.5	T	2	0.839852	0.495985	0.95125	1.47858	0.290848	-0.801199	0.653026	0.46435	5	0.295738	0.820639	0.368955	11.291	0.781202	1	A/T/W	1.75245	-0.150051	0	1	2	4	Distal Intergenic	1	1830869	1835060	4192	1	ENSSSCT00000074506.1	15904	ENSSSCG00000043317	ENSSSCG00000043317
chr1:1846782	chr1	1846782	S1_1846782	A	G	A	G	0.57143	0.42857	0	4	0.57143	G	0.3333	0.5	A	2	0.839852	0.495985	-0.95125	1.47858	0.290848	-0.801199	0.653026	0.46435	5	0.295738	0.820639	0.368955	11.291	0.781202	1	A/G/R	-0.150051	1.75245	0	2	1	4	Distal Intergenic	1	1830869	1835060	4192	1	ENSSSCT00000074506.1	15913	ENSSSCG00000043317	ENSSSCG00000043317
chr1:1879439	chr1	1879439	S1_1879439	A	G	A	G	0.6	0.4	0.28571	2	0.4	G	0.3333	0.5	A	2	1.14744	0.46567	-0.387761	0.357685	0.6105	-1.46804	1.76404	0.315415	3	0.479947	1.32926	1.32926e-05	6.79672	0.781202	1	A/G/R	1.08028	1.8558	0	2	1	2	Exon (ENSSSCT00000069510.1/ENSSSCG00000051690.1, exon 3 of 3)	1	1875148	1880182	5035	1	ENSSSCT00000069510.1	4291	ENSSSCG00000051690	ENSSSCG00000051690
chr1:1889710	chr1	1889710	S1_1889710	C	T	T	C	0.57143	0.42857	0	2	0.28571	C	0.5	0.375	T	2	12443.9	2.5823e-08	-0.059988	0.0104338	0.923557	0.909973	2.40076	0.196204	5	0.999839	1.45149	1.45149e-05	13.0051	1.31662e-07	0.00234161	C/T/Y	-0.969961	-0.849985	0	2	3	2	Distal Intergenic	1	1875148	1880182	5035	1	ENSSSCT00000069510.1	14562	ENSSSCG00000051690	ENSSSCG00000051690
chr1:1901585	chr1	1901585	S1_1901585	C	G	C	G	0.5	0.5	0.14286	2	0.33333	G	0.5	0.5	C	2	0.16595	0.854366	-0.232078	0.080753	0.794765	0.572619	0.250216	0.651313	4	0.000103525	1.85443	1.85443e-05	12.0842	0.963464	1	C/G/S	-0.804697	-0.340542	0	2	2	2	Distal Intergenic	1	1875148	1880182	5035	1	ENSSSCT00000069510.1	26437	ENSSSCG00000051690	ENSSSCG00000051690
chr1:1919276	chr1	1919276	S1_1919276	G	T	T	G	0.57143	0.42857	0	2	0.28571	G	0.5	0.375	T	2	12443.9	2.5823e-08	-0.059988	0.0104338	0.923557	0.909973	2.40076	0.196204	5	0.999839	1.45149	1.45149e-05	13.0051	1.31662e-07	0.00234161	G/T/K	-0.969961	-0.849985	0	2	3	2	Distal Intergenic	1	1930020	1958139	28120	1	ENSSSCT00000004444.4	-10744	ENSSSCG00000027404	ENSSSCG00000027404
chr1:1922184	chr1	1922184	S1_1922184	T	C	C	T	0.5	0.5	0	3	0.42857	C	0.3333	0.625	T	2	0.541228	0.619402	0.507497	0.704773	0.44843	-0.567491	0.37768	0.572084	5	0.212979	1.46175e-05	1.46175	12.8701	0.842568	1	C/T/Y	1.07499	0.0599936	0	2	2	3	Distal Intergenic	1	1930020	1958139	28120	1	ENSSSCT00000004444.4	-7836	ENSSSCG00000027404	ENSSSCG00000027404
chr1:1942970	chr1	1942970	S1_1942970	A	G	A	G	0.64286	0.35714	0	1	0.14286	G	0.5	0.25	A	2	0.286513	0.76509	0.338407	0.308847	0.608006	-0.618559	0.180455	0.692837	5	0.125306	1.19169	0.351312	12.295	0.911583	1	A/G/R	0.956966	0.280152	0	4	2	1	Promoter (1-2kb)	1	1941655	1958145	16491	1	ENSSSCT00000059154.2	1315	ENSSSCG00000027404	ENSSSCG00000027404
chr1:1943014	chr1	1943014	S1_1943014	A	G	G	A	0.64286	0.35714	0	1	0.14286	A	0.5	0.25	G	2	0.286513	0.76509	-0.338407	0.308847	0.608006	-0.618559	0.180455	0.692837	5	0.125306	1.19169	0.351312	12.295	0.911583	1	A/G/R	0.280152	0.956966	0	2	4	1	Promoter (1-2kb)	1	1941655	1958145	16491	1	ENSSSCT00000059154.2	1359	ENSSSCG00000027404	ENSSSCG00000027404
chr1:1943053	chr1	1943053	S1_1943053	A	C	A	C	0.57143	0.42857	0	4	0.57143	C	0.3333	0.5	A	2	16064.5	1.54958e-08	-0.576998	1.2461	0.326828	-0.273005	0.278957	0.62533	5	0.999876	1.12439	1.12439e-05	12.3892	9.61171e-08	0.00140515	A/C/M	-0.303994	0.850003	0	2	1	4	Promoter (1-2kb)	1	1941655	1958145	16491	1	ENSSSCT00000059154.2	1398	ENSSSCG00000027404	ENSSSCG00000027404
chr1:1972457	chr1	1972457	S1_1972457	C	T	C	T	0.64286	0.35714	0	1	0.14286	T	0.5	0.25	C	2	0.286513	0.76509	0.338407	0.308847	0.608006	-0.618559	0.180455	0.692837	5	0.125306	1.19169	0.351312	12.295	0.911583	1	C/T/Y	0.956966	0.280152	0	4	2	1	Promoter (2-3kb)	1	1974565	1976119	1555	1	ENSSSCT00000028127.3	-2108	ENSSSCG00000022580	ENSSSCG00000022580
chr1:1975722	chr1	1975722	S1_1975722	C	G	C	G	0.57143	0.42857	0	4	0.57143	G	0.3333	0.5	C	2	16064.5	1.54958e-08	-0.576998	1.2461	0.326828	-0.273005	0.278957	0.62533	5	0.999876	1.12439	1.12439e-05	12.3892	9.61171e-08	0.00140515	C/G/S	-0.303994	0.850003	0	2	1	4	Promoter (1-2kb)	1	1974565	1976119	1555	1	ENSSSCT00000028127.3	1157	ENSSSCG00000022580	ENSSSCG00000022580
chr1:1994947	chr1	1994947	S1_1994947	T	G	T	G	0.71429	0.28571	0	2	0.28571	G	0.3333	0.25	T	2	0.879899	0.482287	-0.465001	0.536431	0.50452	1.32999	1.68784	0.26371	5	0.305531	1.28985e-05	1.28985	12.3697	0.781202	1	G/T/K	-1.79499	-0.864991	0	1	4	2	Promoter (2-3kb)	1	1980555	1997233	16679	2	ENSSSCT00000086836.1	2286	ENSSSCG00000032403	ENSSSCG00000032403
chr1:2004189	chr1	2004189	S1_2004189	C	G	C	G	0.64286	0.35714	0	3	0.42857	G	0.3333	0.375	C	2	0.31833	0.744234	-0.423233	0.328294	0.597336	-0.742473	0.558238	0.496498	5	0.13731	0.448809	1.01976	12.9402	0.900455	1	C/G/S	0.319241	1.16571	0	3	1	3	Promoter (<=1kb)	1	2004228	2006926	2699	1	ENSSSCT00000054151.2	-39	ENSSSCG00000037137	ENSSSCG00000037137
chr1:2017217	chr1	2017217	S1_2017217	A	G	A	G	0.66667	0.33333	0.14286	2	0.33333	G	0.3333	0.3333	A	2	1.16031	0.423388	-0.354356	0.40245	0.570897	-1.39597	1.93819	0.258117	4	0.000453286	1.16129	1.16129e-05	11.0564	0.754361	1	A/G/R	1.04161	1.75032	0	3	1	2	Promoter (2-3kb)	1	2018608	2019821	1214	2	ENSSSCT00000026678.2	2604	ENSSSCG00000024562	ENSSSCG00000024562
chr1:2030823	chr1	2030823	S1_2030823	C	G	C	G	0.57143	0.42857	0	4	0.57143	G	0.3333	0.5	C	2	12738.4	2.46428e-08	0.0778834	0.0180035	0.899743	0.772105	1.76934	0.254237	5	0.999843	1.41793	1.41793e-05	13.317	1.30388e-07	0.00223459	C/G/S	-0.694222	-0.849989	0	2	1	4	Distal Intergenic	1	2018608	2019821	1214	2	ENSSSCT00000026678.2	-11002	ENSSSCG00000024562	ENSSSCG00000024562
chr1:2062488	chr1	2062488	S1_2062488	G	A	G	A	0.6	0.4	0.28571	2	0.4	A	0.25	0.5	G	2	0.0587874	0.944477	0.341867	0.116867	0.765037	-0.0974696	0.00538159	0.948197	3	0.0529596	1.85853	1.85853e-05	7.15196	1	1	A/G/R	0.439336	-0.244397	0	1	2	2	Distal Intergenic	1	2074662	2074974	313	1	ENSSSCT00000038732.2	-12174	ENSSSCG00000034196	ENSSSCG00000034196
chr1:2062489	chr1	2062489	S1_2062489	A	C	A	C	0.6	0.4	0.28571	2	0.4	C	0.25	0.5	A	2	0.0587874	0.944477	-0.341867	0.116867	0.765037	-0.0974696	0.00538159	0.948197	3	0.0529596	1.85853	1.85853e-05	7.15196	1	1	A/C/M	-0.244397	0.439336	0	2	1	2	Distal Intergenic	1	2074662	2074974	313	1	ENSSSCT00000038732.2	-12173	ENSSSCG00000034196	ENSSSCG00000034196
chr1:2062490	chr1	2062490	S1_2062490	G	A	G	A	0.6	0.4	0.28571	2	0.4	A	0.25	0.5	G	2	0.0587874	0.944477	0.341867	0.116867	0.765037	-0.0974696	0.00538159	0.948197	3	0.0529596	1.85853	1.85853e-05	7.15196	1	1	A/G/R	0.439336	-0.244397	0	1	2	2	Distal Intergenic	1	2074662	2074974	313	1	ENSSSCT00000038732.2	-12172	ENSSSCG00000034196	ENSSSCG00000034196
chr1:2062491	chr1	2062491	S1_2062491	G	T	G	T	0.6	0.4	0.28571	2	0.4	T	0.25	0.5	G	2	0.0587874	0.944477	-0.341867	0.116867	0.765037	-0.0974696	0.00538159	0.948197	3	0.0529596	1.85853	1.85853e-05	7.15196	1	1	G/T/K	-0.244397	0.439336	0	2	1	2	Distal Intergenic	1	2074662	2074974	313	1	ENSSSCT00000038732.2	-12171	ENSSSCG00000034196	ENSSSCG00000034196
chr1:2062731	chr1	2062731	S1_2062731	A	G	A	G	0.75	0.25	0.14286	1	0.16667	G	0.3333	0.1667	A	2	2.24717	0.253268	0.70903	1.67019	0.286776	2.31523	3.96054	0.140669	4	0.599679	0.166533	0.76712	9.58525	0.578769	1	A/G/R	-1.6062	-3.02426	0	4	1	1	Distal Intergenic	1	2074662	2074974	313	1	ENSSSCT00000038732.2	-11931	ENSSSCG00000034196	ENSSSCG00000034196
chr1:2085825	chr1	2085825	S1_2085825	C	T	T	C	0.64286	0.35714	0	1	0.14286	C	0.3333	0.375	T	2	16064.5	1.54958e-08	-0.151997	0.0864727	0.783338	1.002	3.75766	0.124597	5	0.999876	1.12439	1.12439e-05	12.3892	9.61171e-08	0.00140515	C/T/Y	-1.154	-0.850003	0	2	4	1	Downstream (1-2kb)	1	2074662	2074974	313	1	ENSSSCT00000038732.2	11163	ENSSSCG00000034196	ENSSSCG00000034196
chr1:2090995	chr1	2090995	S1_2090995	G	A	A	G	0.57143	0.42857	0	2	0.28571	G	0.5	0.375	A	2	12443.9	2.5823e-08	0.059988	0.0104338	0.923557	0.909973	2.40076	0.196204	5	0.999839	1.45149	1.45149e-05	13.0051	1.31662e-07	0.00234161	A/G/R	-0.849985	-0.969961	0	3	2	2	3' UTR	1	2074662	2074974	313	1	ENSSSCT00000038732.2	16333	ENSSSCG00000034196	ENSSSCG00000034196
chr1:2096512	chr1	2096512	S1_2096512	A	G	A	G	0.58333	0.41667	0.14286	1	0.16667	G	0.5	0.3333	A	2	0.457831	0.670616	0.475416	0.561336	0.508119	-0.70984	0.223481	0.668665	4	0.00024303	1.57797	1.57797e-05	11.5507	0.867529	1	A/G/R	1.18526	0.234424	0	3	2	1	Intron (ENSSSCT00000054266.2/ENSSSCG00000004023.4, intron 11 of 14)	1	2074662	2074974	313	1	ENSSSCT00000038732.2	21850	ENSSSCG00000034196	ENSSSCG00000034196
chr1:2132228	chr1	2132228	S1_2132228	A	C	A	C	0.5	0.5	0	1	0.14286	C	0.5	0.5	A	2	12394.1	2.60307e-08	0.424991	24788	9.76226e-09	-0.736163	0.26659	0.63286	5	0.999839	1.45731	1.45731e-05	12.9252	1.3226e-07	0.00236044	A/C/M	1.16115	0.311172	0	3	3	1	Distal Intergenic	1	2120989	2128580	7592	1	ENSSSCT00000074816.1	11239	ENSSSCG00000043814	ENSSSCG00000043814
chr1:2132229	chr1	2132229	S1_2132229	G	A	A	G	0.5	0.5	0	1	0.14286	A	0.5	0.5	G	2	12394.1	2.60307e-08	-0.424991	24788	9.76226e-09	-0.736163	0.26659	0.63286	5	0.999839	1.45731	1.45731e-05	12.9252	1.3226e-07	0.00236044	A/G/R	0.311172	1.16115	0	3	3	1	Distal Intergenic	1	2120989	2128580	7592	1	ENSSSCT00000074816.1	11240	ENSSSCG00000043814	ENSSSCG00000043814
chr1:2132383	chr1	2132383	S1_2132383	A	C	C	A	0.57143	0.42857	0	2	0.28571	A	0.5	0.375	C	2	12443.9	2.5823e-08	-0.059988	0.0104338	0.923557	0.909973	2.40076	0.196204	5	0.999839	1.45149	1.45149e-05	13.0051	1.31662e-07	0.00234161	A/C/M	-0.969961	-0.849985	0	2	3	2	Distal Intergenic	1	2120989	2128580	7592	1	ENSSSCT00000074816.1	11394	ENSSSCG00000043814	ENSSSCG00000043814
chr1:2132458	chr1	2132458	S1_2132458	A	G	A	G	0.64286	0.35714	0	1	0.14286	G	0.3333	0.375	A	2	16064.5	1.54958e-08	0.151997	0.0864727	0.783338	1.002	3.75766	0.124597	5	0.999876	1.12439	1.12439e-05	12.3892	9.61171e-08	0.00140515	A/G/R	-0.850003	-1.154	0	4	2	1	Distal Intergenic	1	2120989	2128580	7592	1	ENSSSCT00000074816.1	11469	ENSSSCG00000043814	ENSSSCG00000043814
chr1:2166078	chr1	2166078	S1_2166078	G	T	G	T	0.58333	0.41667	0.14286	1	0.16667	T	0.1667	0.6667	G	2	2.70009	0.213427	-0.743877	3.58048	0.154816	-1.25769	1.50898	0.306875	4	0.000668113	0.735556	7.35556e-06	9.43767	0.526111	1	G/T/K	0.513816	2.00157	0	3	2	1	Downstream (<1kb)	1	2166292	2176443	10152	2	ENSSSCT00000071606.1	10365	ENSSSCG00000048164	ENSSSCG00000048164
chr1:2171914	chr1	2171914	S1_2171914	C	T	C	T	0.57143	0.42857	0	2	0.28571	T	0.5	0.375	C	2	12443.9	2.5823e-08	0.059988	0.0104338	0.923557	0.909973	2.40076	0.196204	5	0.999839	1.45149	1.45149e-05	13.0051	1.31662e-07	0.00234161	C/T/Y	-0.849985	-0.969961	0	3	2	2	Intron (ENSSSCT00000071606.1/ENSSSCG00000048164.1, intron 1 of 1)	1	2166292	2176443	10152	2	ENSSSCT00000071606.1	4529	ENSSSCG00000048164	ENSSSCG00000048164
chr1:2172097	chr1	2172097	S1_2172097	G	A	A	G	0.57143	0.42857	0	2	0.28571	G	0.5	0.375	A	2	12443.9	2.5823e-08	0.059988	0.0104338	0.923557	0.909973	2.40076	0.196204	5	0.999839	1.45149	1.45149e-05	13.0051	1.31662e-07	0.00234161	A/G/R	-0.849985	-0.969961	0	3	2	2	Intron (ENSSSCT00000071606.1/ENSSSCG00000048164.1, intron 1 of 1)	1	2166292	2176443	10152	2	ENSSSCT00000071606.1	4346	ENSSSCG00000048164	ENSSSCG00000048164
chr1:2178229	chr1	2178229	S1_2178229	A	C	A	C	0.66667	0.33333	0.14286	2	0.33333	C	0.5	0.1667	A	2	13352.3	1.19049e-06	0.535966	0.578209	0.502317	1.38595	3.86627	0.143967	4	0.999888	1.35278	1.35278e-05	10.5396	5.6668e-06	0.107953	A/C/M	-0.849984	-1.92192	0	3	1	2	Promoter (1-2kb)	1	2166292	2176443	10152	2	ENSSSCT00000071606.1	-1786	ENSSSCG00000048164	ENSSSCG00000048164
chr1:2178327	chr1	2178327	S1_2178327	G	C	C	G	0.5	0.5	0	3	0.42857	C	0.5	0.5	G	2	0.071929	0.931773	0.236344	0.0949142	0.773397	0.240365	0.0484636	0.836538	5	0.034716	1.38997	0.352318	12.6217	1	1	C/G/S	-0.00402194	-0.476709	0	2	2	3	Promoter (1-2kb)	1	2166292	2176443	10152	2	ENSSSCT00000071606.1	-1884	ENSSSCG00000048164	ENSSSCG00000048164
chr1:2198883	chr1	2198883	S1_2198883	C	T	T	C	0.57143	0.42857	0	2	0.28571	C	0.5	0.375	T	2	12443.9	2.5823e-08	-0.059988	0.0104338	0.923557	0.909973	2.40076	0.196204	5	0.999839	1.45149	1.45149e-05	13.0051	1.31662e-07	0.00234161	C/T/Y	-0.969961	-0.849985	0	2	3	2	Distal Intergenic	1	2203605	2522601	318997	1	ENSSSCT00000004447.4	-4722	ENSSSCG00000004022	ENSSSCG00000004022
chr1:2199633	chr1	2199633	S1_2199633	C	T	C	T	0.5	0.5	0	1	0.14286	T	0.5	0.5	C	2	15230.4	1.72395e-08	-0.424997	30460.4	6.46525e-09	-0.728218	0.320552	0.60153	5	0.999869	1.18597	1.18597e-05	12.101	1.01169e-07	0.00156326	C/T/Y	0.303221	1.15322	0	3	3	1	Distal Intergenic	1	2203605	2522601	318997	1	ENSSSCT00000004447.4	-3972	ENSSSCG00000004022	ENSSSCG00000004022
chr1:2199658	chr1	2199658	S1_2199658	G	A	A	G	0.5	0.5	0	1	0.14286	A	0.5	0.5	G	2	15230.4	1.72395e-08	0.424997	30460.4	6.46525e-09	-0.728218	0.320552	0.60153	5	0.999869	1.18597	1.18597e-05	12.101	1.01169e-07	0.00156326	A/G/R	1.15322	0.303221	0	3	3	1	Distal Intergenic	1	2203605	2522601	318997	1	ENSSSCT00000004447.4	-3947	ENSSSCG00000004022	ENSSSCG00000004022
chr1:2202745	chr1	2202745	S1_2202745	T	C	C	T	0.5	0.5	0	1	0.14286	C	0.5	0.5	T	2	12394.1	2.60307e-08	-0.424991	24788	9.76226e-09	-0.736163	0.26659	0.63286	5	0.999839	1.45731	1.45731e-05	12.9252	1.3226e-07	0.00236044	C/T/Y	0.311172	1.16115	0	3	3	1	Promoter (<=1kb)	1	2203605	2522601	318997	1	ENSSSCT00000004447.4	-860	ENSSSCG00000004022	ENSSSCG00000004022
chr1:2202774	chr1	2202774	S1_2202774	A	G	A	G	0.5	0.5	0	1	0.14286	G	0.5	0.5	A	2	12394.1	2.60307e-08	0.424991	24788	9.76226e-09	-0.736163	0.26659	0.63286	5	0.999839	1.45731	1.45731e-05	12.9252	1.3226e-07	0.00236044	A/G/R	1.16115	0.311172	0	3	3	1	Promoter (<=1kb)	1	2203605	2522601	318997	1	ENSSSCT00000004447.4	-831	ENSSSCG00000004022	ENSSSCG00000004022
chr1:2204395	chr1	2204395	S1_2204395	C	G	C	G	0.7	0.3	0.28571	1	0.2	G	0.5	0	C	2	0.809349	0.552685	0.941665	1.41981	0.355661	-0.211665	0.017934	0.905728	3	0.447315	1.87361e-05	1.87361	6.93151	0.807257	1	C/G/S	1.15333	-0.73	0	3	1	1	Promoter (<=1kb)	1	2203633	2522592	318960	1	ENSSSCT00000044784.2	762	ENSSSCG00000004022	ENSSSCG00000004022
chr1:2204396	chr1	2204396	S1_2204396	C	T	C	T	0.7	0.3	0.28571	1	0.2	T	0.5	0	C	2	0.809349	0.552685	0.941665	1.41981	0.355661	-0.211665	0.017934	0.905728	3	0.447315	1.87361e-05	1.87361	6.93151	0.807257	1	C/T/Y	1.15333	-0.73	0	3	1	1	Promoter (<=1kb)	1	2203633	2522592	318960	1	ENSSSCT00000044784.2	763	ENSSSCG00000004022	ENSSSCG00000004022
chr1:2257585	chr1	2257585	S1_2257585	G	A	A	G	0.5	0.5	0	3	0.42857	A	0.5	0.5	G	2	0.071929	0.931773	0.236344	0.0949142	0.773397	0.240365	0.0484636	0.836538	5	0.034716	1.38997	0.352318	12.6217	1	1	A/G/R	-0.00402194	-0.476709	0	2	2	3	Intron (ENSSSCT00000004447.4/ENSSSCG00000004022.4, intron 2 of 21)	1	2261916	2522601	260686	1	ENSSSCT00000041914.2	-4331	ENSSSCG00000004022	ENSSSCG00000004022
chr1:2266095	chr1	2266095	S1_2266095	G	T	G	T	0.71429	0.28571	0	2	0.28571	T	0.3333	0.25	G	2	6.79877	0.0516674	-0.697138	3.66941	0.127922	-2.13162	13.2481	0.0219687	5	0.772695	0.0084703	0.41071	7.87107	0.203628	1	G/T/K	1.43449	2.82876	0	4	1	2	Intron (ENSSSCT00000004447.4/ENSSSCG00000004022.4, intron 3 of 21)	1	2261916	2522601	260686	1	ENSSSCT00000041914.2	4179	ENSSSCG00000004022	ENSSSCG00000004022
chr1:2266099	chr1	2266099	S1_2266099	T	C	T	C	0.71429	0.28571	0	2	0.28571	C	0.3333	0.25	T	2	6.79877	0.0516674	0.697138	3.66941	0.127922	-2.13162	13.2481	0.0219687	5	0.772695	0.0084703	0.41071	7.87107	0.203628	1	C/T/Y	2.82876	1.43449	0	1	4	2	Intron (ENSSSCT00000004447.4/ENSSSCG00000004022.4, intron 3 of 21)	1	2261916	2522601	260686	1	ENSSSCT00000041914.2	4183	ENSSSCG00000004022	ENSSSCG00000004022
chr1:2266121	chr1	2266121	S1_2266121	G	A	G	A	0.71429	0.28571	0	2	0.28571	A	0.3333	0.25	G	2	6.79877	0.0516674	0.697138	3.66941	0.127922	-2.13162	13.2481	0.0219687	5	0.772695	0.0084703	0.41071	7.87107	0.203628	1	A/G/R	2.82876	1.43449	0	1	4	2	Intron (ENSSSCT00000004447.4/ENSSSCG00000004022.4, intron 3 of 21)	1	2261916	2522601	260686	1	ENSSSCT00000041914.2	4205	ENSSSCG00000004022	ENSSSCG00000004022
chr1:2266122	chr1	2266122	S1_2266122	C	T	C	T	0.71429	0.28571	0	2	0.28571	T	0.3333	0.25	C	2	6.79877	0.0516674	-0.697138	3.66941	0.127922	-2.13162	13.2481	0.0219687	5	0.772695	0.0084703	0.41071	7.87107	0.203628	1	C/T/Y	1.43449	2.82876	0	4	1	2	Intron (ENSSSCT00000004447.4/ENSSSCG00000004022.4, intron 3 of 21)	1	2261916	2522601	260686	1	ENSSSCT00000041914.2	4206	ENSSSCG00000004022	ENSSSCG00000004022
chr1:2266126	chr1	2266126	S1_2266126	G	A	G	A	0.71429	0.28571	0	2	0.28571	A	0.3333	0.25	G	2	6.79877	0.0516674	0.697138	3.66941	0.127922	-2.13162	13.2481	0.0219687	5	0.772695	0.0084703	0.41071	7.87107	0.203628	1	A/G/R	2.82876	1.43449	0	1	4	2	Intron (ENSSSCT00000004447.4/ENSSSCG00000004022.4, intron 3 of 21)	1	2261916	2522601	260686	1	ENSSSCT00000041914.2	4210	ENSSSCG00000004022	ENSSSCG00000004022
chr1:2275283	chr1	2275283	S1_2275283	A	T	A	T	0.64286	0.35714	0	3	0.42857	T	0.3333	0.375	A	2	32704.5	3.7393e-09	-0.704053	1.93096	0.237	-1.55406	9.40777	0.0373946	5	0.999939	0.552338	5.52338e-06	8.75717	4.7483e-08	0.000339076	A/T/W	0.850008	2.25811	0	3	1	3	Intron (ENSSSCT00000004447.4/ENSSSCG00000004022.4, intron 3 of 21)	1	2261916	2522601	260686	1	ENSSSCT00000041914.2	13367	ENSSSCG00000004022	ENSSSCG00000004022
chr1:2275394	chr1	2275394	S1_2275394	G	A	G	A	0.78571	0.21429	0	1	0.14286	A	0.1667	0.25	G	2	1.39524	0.346993	0.821013	1.69198	0.263216	-1.77121	2.10294	0.220623	5	0.410939	0.590641	0.387225	10.7715	0.696766	1	A/G/R	2.59222	0.950195	0	1	5	1	Intron (ENSSSCT00000004447.4/ENSSSCG00000004022.4, intron 3 of 21)	1	2261916	2522601	260686	1	ENSSSCT00000041914.2	13478	ENSSSCG00000004022	ENSSSCG00000004022
chr1:2288392	chr1	2288392	S1_2288392	A	G	A	G	0.78571	0.21429	0	1	0.14286	G	0.1667	0.25	A	2	1.39524	0.346993	-0.821013	1.69198	0.263216	-1.77121	2.10294	0.220623	5	0.410939	0.590641	0.387225	10.7715	0.696766	1	A/G/R	0.950195	2.59222	0	5	1	1	Intron (ENSSSCT00000004447.4/ENSSSCG00000004022.4, intron 3 of 21)	1	2261916	2522601	260686	1	ENSSSCT00000041914.2	26476	ENSSSCG00000004022	ENSSSCG00000004022
chr1:2291558	chr1	2291558	S1_2291558	T	C	T	C	0.64286	0.35714	0	1	0.14286	C	0.1667	0.5	T	2	1.43327	0.339346	0.387496	0.740152	0.438122	-1.7675	2.43148	0.19393	5	0.417466	1.08195e-05	1.08195	11.6666	0.694022	1	C/T/Y	2.15499	1.38	0	2	4	1	Intron (ENSSSCT00000004447.4/ENSSSCG00000004022.4, intron 3 of 21)	1	2320984	2522601	201618	1	ENSSSCT00000052370.2	-29426	ENSSSCG00000004022	ENSSSCG00000004022
chr1:2291627	chr1	2291627	S1_2291627	C	T	C	T	0.78571	0.21429	0	1	0.14286	T	0.1667	0.25	C	2	1.39524	0.346993	-0.821013	1.69198	0.263216	-1.77121	2.10294	0.220623	5	0.410939	0.590641	0.387225	10.7715	0.696766	1	C/T/Y	0.950195	2.59222	0	5	1	1	Intron (ENSSSCT00000004447.4/ENSSSCG00000004022.4, intron 3 of 21)	1	2320984	2522601	201618	1	ENSSSCT00000052370.2	-29357	ENSSSCG00000004022	ENSSSCG00000004022
chr1:2304227	chr1	2304227	S1_2304227	G	A	A	G	0.5	0.5	0	3	0.42857	G	0.5	0.5	A	2	0.00399253	0.996019	0.0644008	0.00751527	0.935084	0.0233809	0.000407879	0.984854	5	0.00199229	1.45343	0.357276	12.7816	1	1	A/G/R	0.0410198	-0.0877817	0	2	2	3	Intron (ENSSSCT00000004447.4/ENSSSCG00000004022.4, intron 3 of 21)	1	2320984	2522601	201618	1	ENSSSCT00000052370.2	-16757	ENSSSCG00000004022	ENSSSCG00000004022
chr1:2304261	chr1	2304261	S1_2304261	C	T	C	T	0.5	0.5	0	3	0.42857	C	0.5	0.5	T	2	0.00399253	0.996019	-0.0644008	0.00751527	0.935084	0.0233809	0.000407879	0.984854	5	0.00199229	1.45343	0.357276	12.7816	1	1	C/T/Y	-0.0877817	0.0410198	0	2	2	3	Intron (ENSSSCT00000004447.4/ENSSSCG00000004022.4, intron 3 of 21)	1	2320984	2522601	201618	1	ENSSSCT00000052370.2	-16723	ENSSSCG00000004022	ENSSSCG00000004022
chr1:2342221	chr1	2342221	S1_2342221	A	G	A	G	0.78571	0.21429	0	1	0.14286	G	0.1667	0.25	A	2	1.39524	0.346993	-0.821013	1.69198	0.263216	-1.77121	2.10294	0.220623	5	0.410939	0.590641	0.387225	10.7715	0.696766	1	A/G/R	0.950195	2.59222	0	5	1	1	Intron (ENSSSCT00000004447.4/ENSSSCG00000004022.4, intron 3 of 21)	1	2323165	2522601	199437	1	ENSSSCT00000061934.2	19056	ENSSSCG00000004022	ENSSSCG00000004022
chr1:2383908	chr1	2383908	S1_2383908	C	T	C	T	0.75	0.25	0.14286	1	0.16667	T	0.5	0	C	2	0.890887	0.496934	0.590201	0.745917	0.451297	-1.01122	0.507458	0.527646	4	0.000387251	1.29215	1.29215e-05	10.9911	0.781202	1	C/T/Y	1.60143	0.421024	0	4	1	1	Intron (ENSSSCT00000004447.4/ENSSSCG00000004022.4, intron 3 of 21)	1	2375137	2522604	147468	1	ENSSSCT00000081849.1	8771	ENSSSCG00000004022	ENSSSCG00000004022
chr1:2417593	chr1	2417593	S1_2417593	G	A	G	A	0.71429	0.28571	0	2	0.28571	A	0.5	0.125	G	2	0.305122	0.752787	-0.292644	0.161774	0.708094	0.725051	0.597658	0.482618	5	0.132367	1.17162	0.353887	13.2524	0.906269	1	A/G/R	-1.0177	-0.432407	0	1	4	2	Intron (ENSSSCT00000004447.4/ENSSSCG00000004022.4, intron 3 of 21)	1	2436062	2516924	80863	1	ENSSSCT00000056494.2	-18469	ENSSSCG00000004022	ENSSSCG00000004022
chr1:2417764	chr1	2417764	S1_2417764	G	A	G	A	0.78571	0.21429	0	1	0.14286	A	0.1667	0.25	G	2	1.39524	0.346993	0.821013	1.69198	0.263216	-1.77121	2.10294	0.220623	5	0.410939	0.590641	0.387225	10.7715	0.696766	1	A/G/R	2.59222	0.950195	0	1	5	1	Intron (ENSSSCT00000004447.4/ENSSSCG00000004022.4, intron 3 of 21)	1	2436062	2516924	80863	1	ENSSSCT00000056494.2	-18298	ENSSSCG00000004022	ENSSSCG00000004022
chr1:2417806	chr1	2417806	S1_2417806	G	A	G	A	0.78571	0.21429	0	1	0.14286	A	0.1667	0.25	G	2	1.39524	0.346993	0.821013	1.69198	0.263216	-1.77121	2.10294	0.220623	5	0.410939	0.590641	0.387225	10.7715	0.696766	1	A/G/R	2.59222	0.950195	0	1	5	1	Intron (ENSSSCT00000004447.4/ENSSSCG00000004022.4, intron 3 of 21)	1	2436062	2516924	80863	1	ENSSSCT00000056494.2	-18256	ENSSSCG00000004022	ENSSSCG00000004022
chr1:2417872	chr1	2417872	S1_2417872	T	C	T	C	0.57143	0.42857	0	4	0.57143	C	0.3333	0.5	T	2	1.04427	0.431612	0.752207	1.05642	0.362121	-1.24928	1.67864	0.264815	5	0.343028	0.70634	0.39048	11.0816	0.757801	1	C/T/Y	2.00148	0.497071	0	1	2	4	Intron (ENSSSCT00000004447.4/ENSSSCG00000004022.4, intron 3 of 21)	1	2436062	2516924	80863	1	ENSSSCT00000056494.2	-18190	ENSSSCG00000004022	ENSSSCG00000004022
chr1:2417882	chr1	2417882	S1_2417882	A	G	A	G	0.57143	0.42857	0	4	0.57143	G	0.3333	0.5	A	2	1.04427	0.431612	-0.752207	1.05642	0.362121	-1.24928	1.67864	0.264815	5	0.343028	0.70634	0.39048	11.0816	0.757801	1	A/G/R	0.497071	2.00148	0	2	1	4	Intron (ENSSSCT00000004447.4/ENSSSCG00000004022.4, intron 3 of 21)	1	2436062	2516924	80863	1	ENSSSCT00000056494.2	-18180	ENSSSCG00000004022	ENSSSCG00000004022
chr1:2430230	chr1	2430230	S1_2430230	G	A	G	A	0.78571	0.21429	0	1	0.14286	A	0.1667	0.25	G	2	1.39524	0.346993	0.821013	1.69198	0.263216	-1.77121	2.10294	0.220623	5	0.410939	0.590641	0.387225	10.7715	0.696766	1	A/G/R	2.59222	0.950195	0	1	5	1	Intron (ENSSSCT00000004447.4/ENSSSCG00000004022.4, intron 3 of 21)	1	2436062	2516924	80863	1	ENSSSCT00000056494.2	-5832	ENSSSCG00000004022	ENSSSCG00000004022
chr1:2430611	chr1	2430611	S1_2430611	C	T	C	T	0.78571	0.21429	0	1	0.14286	T	0	0.375	C	2	27335.6	5.35229e-09	-0.952368	2.95322	0.160833	-0.10236	0.0341142	0.862451	5	0.999927	0.660815	6.60815e-06	10.0622	6.02383e-08	0.00048534	C/T/Y	-0.850007	1.05473	0	5	1	1	Intron (ENSSSCT00000004447.4/ENSSSCG00000004022.4, intron 3 of 21)	1	2436062	2516924	80863	1	ENSSSCT00000056494.2	-5451	ENSSSCG00000004022	ENSSSCG00000004022
chr1:2430617	chr1	2430617	S1_2430617	T	C	T	C	0.64286	0.35714	0	1	0.14286	C	0.3333	0.375	T	2	15728.4	1.61651e-08	0.0158141	0.000984971	0.976467	0.83419	2.74054	0.173174	5	0.999873	1.14842	1.14842e-05	12.5458	9.61171e-08	0.00146583	C/T/Y	-0.818376	-0.850004	0	2	4	1	Intron (ENSSSCT00000004447.4/ENSSSCG00000004022.4, intron 3 of 21)	1	2436062	2516924	80863	1	ENSSSCT00000056494.2	-5445	ENSSSCG00000004022	ENSSSCG00000004022
chr1:2438961	chr1	2438961	S1_2438961	G	A	G	A	0.71429	0.28571	0	2	0.28571	A	0.3333	0.25	G	2	2.45579	0.20147	0.247627	0.214808	0.667121	-1.79579	4.67407	0.0966766	5	0.551146	0.406121	0.336876	9.8695	0.526111	1	A/G/R	2.04342	1.54816	0	1	4	2	Promoter (2-3kb)	1	2436062	2516924	80863	1	ENSSSCT00000056494.2	2899	ENSSSCG00000004022	ENSSSCG00000004022
chr1:2438996	chr1	2438996	S1_2438996	C	T	T	C	0.57143	0.42857	0	2	0.28571	C	0.5	0.375	T	2	1.4714	0.331933	-0.106839	0.0306548	0.869518	0.829875	1.41062	0.300658	5	0.423864	1.46254	0.100762	13.3128	0.686119	1	C/T/Y	-0.936714	-0.723036	0	2	3	2	Promoter (2-3kb)	1	2436062	2516924	80863	1	ENSSSCT00000056494.2	2934	ENSSSCG00000004022	ENSSSCG00000004022
chr1:2438997	chr1	2438997	S1_2438997	C	A	A	C	0.57143	0.42857	0	2	0.28571	C	0.5	0.375	A	2	1.4714	0.331933	0.106839	0.0306548	0.869518	0.829875	1.41062	0.300658	5	0.423864	1.46254	0.100762	13.3128	0.686119	1	A/C/M	-0.723036	-0.936714	0	3	2	2	Promoter (2-3kb)	1	2436062	2516924	80863	1	ENSSSCT00000056494.2	2935	ENSSSCG00000004022	ENSSSCG00000004022
chr1:2441831	chr1	2441831	S1_2441831	A	G	A	G	0.57143	0.42857	0	2	0.28571	G	0.5	0.375	A	2	1.4714	0.331933	0.106839	0.0306548	0.869518	0.829875	1.41062	0.300658	5	0.423864	1.46254	0.100762	13.3128	0.686119	1	A/G/R	-0.723036	-0.936714	0	3	2	2	Intron (ENSSSCT00000004447.4/ENSSSCG00000004022.4, intron 4 of 21)	1	2436062	2516924	80863	1	ENSSSCT00000056494.2	5769	ENSSSCG00000004022	ENSSSCG00000004022
chr1:2441892	chr1	2441892	S1_2441892	C	T	C	T	0.78571	0.21429	0	1	0.14286	T	0.1667	0.25	C	2	0.563726	0.608579	-0.431548	0.35198	0.584914	-1.5242	1.08345	0.356703	5	0.219885	0.998511	0.349074	11.8132	0.830517	1	C/T/Y	1.09265	1.95575	0	5	1	1	Intron (ENSSSCT00000004447.4/ENSSSCG00000004022.4, intron 4 of 21)	1	2436062	2516924	80863	1	ENSSSCT00000056494.2	5830	ENSSSCG00000004022	ENSSSCG00000004022
chr1:2445404	chr1	2445404	S1_2445404	G	A	A	G	0.5	0.5	0	1	0.14286	A	0.5	0.5	G	2	4.07016	0.108557	-0.39224	7.39901	0.0529807	-1.22827	0.788864	0.424627	5	0.670519	1.31089	0.0435505	12.6297	0.367817	1	A/G/R	0.836033	1.62051	0	3	3	1	Intron (ENSSSCT00000004447.4/ENSSSCG00000004022.4, intron 5 of 21)	1	2436062	2516924	80863	1	ENSSSCT00000056494.2	9342	ENSSSCG00000004022	ENSSSCG00000004022
chr1:2445441	chr1	2445441	S1_2445441	G	A	A	G	0.5	0.5	0	1	0.14286	A	0.5	0.5	G	2	4.07016	0.108557	-0.39224	7.39901	0.0529807	-1.22827	0.788864	0.424627	5	0.670519	1.31089	0.0435505	12.6297	0.367817	1	A/G/R	0.836033	1.62051	0	3	3	1	Intron (ENSSSCT00000004447.4/ENSSSCG00000004022.4, intron 5 of 21)	1	2436062	2516924	80863	1	ENSSSCT00000056494.2	9379	ENSSSCG00000004022	ENSSSCG00000004022
chr1:2455256	chr1	2455256	S1_2455256	A	C	A	C	0.57143	0.42857	0	2	0.28571	C	0.5	0.375	A	2	1.4714	0.331933	0.106839	0.0306548	0.869518	0.829875	1.41062	0.300658	5	0.423864	1.46254	0.100762	13.3128	0.686119	1	A/C/M	-0.723036	-0.936714	0	3	2	2	Intron (ENSSSCT00000004447.4/ENSSSCG00000004022.4, intron 5 of 21)	1	2436062	2516924	80863	1	ENSSSCT00000056494.2	19194	ENSSSCG00000004022	ENSSSCG00000004022
chr1:2455311	chr1	2455311	S1_2455311	C	T	C	T	0.57143	0.42857	0	2	0.28571	T	0.5	0.375	C	2	1.4714	0.331933	0.106839	0.0306548	0.869518	0.829875	1.41062	0.300658	5	0.423864	1.46254	0.100762	13.3128	0.686119	1	C/T/Y	-0.723036	-0.936714	0	3	2	2	Intron (ENSSSCT00000004447.4/ENSSSCG00000004022.4, intron 5 of 21)	1	2436062	2516924	80863	1	ENSSSCT00000056494.2	19249	ENSSSCG00000004022	ENSSSCG00000004022
chr1:2468422	chr1	2468422	S1_2468422	A	T	A	T	0.5	0.5	0.28571	1	0.2	T	0.5	0.5	A	2	0.335397	0.748841	-0.293524	0.138345	0.745644	0.938907	0.520284	0.545645	3	0.237836	1.81231	1.81231e-05	7.4753	0.904001	1	A/T/W	-1.23243	-0.645383	0	2	2	1	Intron (ENSSSCT00000004447.4/ENSSSCG00000004022.4, intron 10 of 21)	1	2436062	2516924	80863	1	ENSSSCT00000056494.2	32360	ENSSSCG00000004022	ENSSSCG00000004022
chr1:2468430	chr1	2468430	S1_2468430	C	G	C	G	0.5	0.5	0.28571	1	0.2	G	0.5	0.5	C	2	0.335397	0.748841	-0.293524	0.138345	0.745644	0.938907	0.520284	0.545645	3	0.237836	1.81231	1.81231e-05	7.4753	0.904001	1	C/G/S	-1.23243	-0.645383	0	2	2	1	Intron (ENSSSCT00000004447.4/ENSSSCG00000004022.4, intron 10 of 21)	1	2436062	2516924	80863	1	ENSSSCT00000056494.2	32368	ENSSSCG00000004022	ENSSSCG00000004022
chr1:2469662	chr1	2469662	S1_2469662	C	T	T	C	0.6	0.4	0.28571	2	0.4	C	0.25	0.5	T	2	0.0690706	0.935392	0.234373	0.0597485	0.829684	-0.467413	0.113113	0.768636	3	0.0643024	1.41486	0.497919	7.12555	1	1	C/T/Y	0.701785	0.23304	0	1	2	2	Intron (ENSSSCT00000004447.4/ENSSSCG00000004022.4, intron 10 of 21)	1	2436062	2516924	80863	1	ENSSSCT00000056494.2	33600	ENSSSCG00000004022	ENSSSCG00000004022
chr1:2469856	chr1	2469856	S1_2469856	C	T	C	T	0.64286	0.35714	0	1	0.14286	T	0.3333	0.375	C	2	16064.5	1.54958e-08	0.151997	0.0864727	0.783338	1.002	3.75766	0.124597	5	0.999876	1.12439	1.12439e-05	12.3892	9.61171e-08	0.00140515	C/T/Y	-0.850003	-1.154	0	4	2	1	Intron (ENSSSCT00000004447.4/ENSSSCG00000004022.4, intron 10 of 21)	1	2436062	2516924	80863	1	ENSSSCT00000056494.2	33794	ENSSSCG00000004022	ENSSSCG00000004022
chr1:2472730	chr1	2472730	S1_2472730	A	C	A	C	0.64286	0.35714	0	1	0.14286	C	0.3333	0.375	A	2	16064.5	1.54958e-08	0.151997	0.0864727	0.783338	1.002	3.75766	0.124597	5	0.999876	1.12439	1.12439e-05	12.3892	9.61171e-08	0.00140515	A/C/M	-0.850003	-1.154	0	4	2	1	Intron (ENSSSCT00000004447.4/ENSSSCG00000004022.4, intron 12 of 21)	1	2436062	2516924	80863	1	ENSSSCT00000056494.2	36668	ENSSSCG00000004022	ENSSSCG00000004022
chr1:2486199	chr1	2486199	S1_2486199	A	G	G	A	0.64286	0.35714	0	1	0.14286	A	0.3333	0.375	G	2	16064.5	1.54958e-08	-0.151997	0.0864727	0.783338	1.002	3.75766	0.124597	5	0.999876	1.12439	1.12439e-05	12.3892	9.61171e-08	0.00140515	A/G/R	-1.154	-0.850003	0	2	4	1	Intron (ENSSSCT00000004447.4/ENSSSCG00000004022.4, intron 12 of 21)	1	2528734	2533425	4692	2	ENSSSCT00000086638.1	47226	ENSSSCG00000048885	ENSSSCG00000048885
chr1:2486206	chr1	2486206	S1_2486206	C	T	T	C	0.64286	0.35714	0	1	0.14286	C	0.3333	0.375	T	2	16064.5	1.54958e-08	-0.151997	0.0864727	0.783338	1.002	3.75766	0.124597	5	0.999876	1.12439	1.12439e-05	12.3892	9.61171e-08	0.00140515	C/T/Y	-1.154	-0.850003	0	2	4	1	Intron (ENSSSCT00000004447.4/ENSSSCG00000004022.4, intron 12 of 21)	1	2528734	2533425	4692	2	ENSSSCT00000086638.1	47219	ENSSSCG00000048885	ENSSSCG00000048885
chr1:2486207	chr1	2486207	S1_2486207	A	G	G	A	0.64286	0.35714	0	1	0.14286	A	0.3333	0.375	G	2	16064.5	1.54958e-08	-0.151997	0.0864727	0.783338	1.002	3.75766	0.124597	5	0.999876	1.12439	1.12439e-05	12.3892	9.61171e-08	0.00140515	A/G/R	-1.154	-0.850003	0	2	4	1	Intron (ENSSSCT00000004447.4/ENSSSCG00000004022.4, intron 12 of 21)	1	2528734	2533425	4692	2	ENSSSCT00000086638.1	47218	ENSSSCG00000048885	ENSSSCG00000048885
chr1:2486301	chr1	2486301	S1_2486301	C	T	T	C	0.57143	0.42857	0	2	0.28571	C	0.5	0.375	T	2	1.4714	0.331933	-0.106839	0.0306548	0.869518	0.829875	1.41062	0.300658	5	0.423864	1.46254	0.100762	13.3128	0.686119	1	C/T/Y	-0.936714	-0.723036	0	2	3	2	Intron (ENSSSCT00000004447.4/ENSSSCG00000004022.4, intron 12 of 21)	1	2528734	2533425	4692	2	ENSSSCT00000086638.1	47124	ENSSSCG00000048885	ENSSSCG00000048885
chr1:2565785	chr1	2565785	S1_2565785	A	G	A	G	0.78571	0.21429	0	1	0.14286	G	0.1667	0.25	A	2	18358.8	1.18652e-08	0.424996	36715.8	4.45006e-09	-1.3561	1.3217	0.31435	5	0.999891	0.983893	9.83893e-06	11.9279	8.89569e-08	0.00107593	A/G/R	1.78109	0.931103	0	5	1	1	Distal Intergenic	1	2576729	2593511	16783	1	ENSSSCT00000004445.4	-10944	ENSSSCG00000004020	ENSSSCG00000004020
chr1:2576230	chr1	2576230	S1_2576230	A	G	A	G	0.57143	0.42857	0	4	0.57143	G	0.3333	0.5	A	2	0.425446	0.67995	-0.273739	0.109362	0.757469	-1.013	0.84526	0.409922	5	0.175409	1.06209	0.365009	11.9119	0.867529	1	A/G/R	0.739261	1.28674	0	2	1	4	Promoter (<=1kb)	1	2576729	2593511	16783	1	ENSSSCT00000004445.4	-499	ENSSSCG00000004020	ENSSSCG00000004020
chr1:2576248	chr1	2576248	S1_2576248	C	T	C	T	0.71429	0.28571	0	2	0.28571	T	0.1667	0.375	C	2	12506.1	2.5567e-08	-0.650849	0.69899	0.450158	0.199132	0.0654304	0.810726	5	0.99984	1.44428	1.44428e-05	12.822	1.31662e-07	0.00231839	C/T/Y	-0.84998	0.451717	0	4	1	2	Promoter (<=1kb)	1	2576729	2593511	16783	1	ENSSSCT00000004445.4	-481	ENSSSCG00000004020	ENSSSCG00000004020
chr1:2576297	chr1	2576297	S1_2576297	G	A	G	A	0.71429	0.28571	0	2	0.28571	A	0.1667	0.375	G	2	12506.1	2.5567e-08	0.650849	0.69899	0.450158	0.199132	0.0654304	0.810726	5	0.99984	1.44428	1.44428e-05	12.822	1.31662e-07	0.00231839	A/G/R	0.451717	-0.84998	0	1	4	2	Promoter (<=1kb)	1	2576729	2593511	16783	1	ENSSSCT00000004445.4	-432	ENSSSCG00000004020	ENSSSCG00000004020
chr1:2576314	chr1	2576314	S1_2576314	G	A	G	A	0.57143	0.42857	0	2	0.28571	A	0.5	0.375	G	2	12698.4	2.47986e-08	0.382421	0.432631	0.546628	0.467567	0.646698	0.46637	5	0.999843	1.42241	1.42241e-05	12.924	1.30512e-07	0.00224872	A/G/R	-0.0851463	-0.849987	0	2	3	2	Promoter (<=1kb)	1	2576729	2593511	16783	1	ENSSSCT00000004445.4	-415	ENSSSCG00000004020	ENSSSCG00000004020
chr1:2584666	chr1	2584666	S1_2584666	C	T	C	T	0.71429	0.28571	0	2	0.28571	T	0.1667	0.375	C	2	12506.1	2.5567e-08	-0.650849	0.69899	0.450158	0.199132	0.0654304	0.810726	5	0.99984	1.44428	1.44428e-05	12.822	1.31662e-07	0.00231839	C/T/Y	-0.84998	0.451717	0	4	1	2	Intron (ENSSSCT00000004445.4/ENSSSCG00000004020.4, intron 1 of 7)	1	2576729	2593511	16783	1	ENSSSCT00000004445.4	7937	ENSSSCG00000004020	ENSSSCG00000004020
chr1:2607685	chr1	2607685	S1_2607685	C	T	T	C	0.57143	0.42857	0	2	0.28571	C	0.5	0.375	T	2	12698.4	2.47986e-08	0.382421	0.432631	0.546628	0.467567	0.646698	0.46637	5	0.999843	1.42241	1.42241e-05	12.924	1.30512e-07	0.00224872	C/T/Y	-0.0851463	-0.849987	0	2	3	2	Distal Intergenic	1	2601130	2602771	1642	2	ENSSSCT00000081383.1	-4914	ENSSSCG00000051382	ENSSSCG00000051382
chr1:2607730	chr1	2607730	S1_2607730	A	G	G	A	0.57143	0.42857	0	2	0.28571	A	0.5	0.375	G	2	12698.4	2.47986e-08	0.382421	0.432631	0.546628	0.467567	0.646698	0.46637	5	0.999843	1.42241	1.42241e-05	12.924	1.30512e-07	0.00224872	A/G/R	-0.0851463	-0.849987	0	2	3	2	Distal Intergenic	1	2601130	2602771	1642	2	ENSSSCT00000081383.1	-4959	ENSSSCG00000051382	ENSSSCG00000051382
chr1:2614318	chr1	2614318	S1_2614318	C	T	C	T	0.64286	0.35714	0	1	0.14286	T	0.3333	0.375	C	2	12738.4	2.46428e-08	0.347111	0.35761	0.582048	-0.502878	0.750532	0.435181	5	0.999843	1.41793	1.41793e-05	13.317	1.30388e-07	0.00223459	C/T/Y	0.849989	0.155767	0	4	2	1	Distal Intergenic	1	2601130	2602771	1642	2	ENSSSCT00000081383.1	-11547	ENSSSCG00000051382	ENSSSCG00000051382
chr1:2629100	chr1	2629100	S1_2629100	C	T	C	T	0.5	0.5	0	1	0.14286	T	0.5	0.5	C	2	18281.1	1.19664e-08	-0.424998	36561.1	4.48779e-09	-1.14888	0.941021	0.386947	5	0.999891	0.988077	9.88077e-06	11.3533	8.89569e-08	0.0010851	C/T/Y	0.723883	1.57388	0	3	3	1	Promoter (2-3kb)	1	2627904	2632041	4138	2	ENSSSCT00000087178.1	2941	ENSSSCG00000049363	ENSSSCG00000049363
chr1:2629112	chr1	2629112	S1_2629112	A	T	A	T	0.5	0.5	0	1	0.14286	T	0.5	0.5	A	2	18281.1	1.19664e-08	-0.424998	36561.1	4.48779e-09	-1.14888	0.941021	0.386947	5	0.999891	0.988077	9.88077e-06	11.3533	8.89569e-08	0.0010851	A/T/W	0.723883	1.57388	0	3	3	1	Promoter (2-3kb)	1	2627904	2632041	4138	2	ENSSSCT00000087178.1	2929	ENSSSCG00000049363	ENSSSCG00000049363
chr1:2629148	chr1	2629148	S1_2629148	T	C	T	C	0.57143	0.42857	0	2	0.28571	C	0.5	0.375	T	2	12698.4	2.47986e-08	0.382421	0.432631	0.546628	0.467567	0.646698	0.46637	5	0.999843	1.42241	1.42241e-05	12.924	1.30512e-07	0.00224872	C/T/Y	-0.0851463	-0.849987	0	2	3	2	Promoter (2-3kb)	1	2627904	2632041	4138	2	ENSSSCT00000087178.1	2893	ENSSSCG00000049363	ENSSSCG00000049363
chr1:2629191	chr1	2629191	S1_2629191	A	G	A	G	0.57143	0.42857	0	2	0.28571	G	0.5	0.375	A	2	12698.4	2.47986e-08	-0.382421	0.432631	0.546628	0.467567	0.646698	0.46637	5	0.999843	1.42241	1.42241e-05	12.924	1.30512e-07	0.00224872	A/G/R	-0.849987	-0.0851463	0	3	2	2	Promoter (2-3kb)	1	2627904	2632041	4138	2	ENSSSCT00000087178.1	2850	ENSSSCG00000049363	ENSSSCG00000049363
chr1:2632722	chr1	2632722	S1_2632722	C	T	T	C	0.57143	0.42857	0	2	0.28571	C	0.3333	0.5	T	2	0.210068	0.818934	-0.0917389	0.0189271	0.897223	0.741872	0.416133	0.554009	5	0.0950505	1.28332	0.339101	12.4088	0.940348	1	C/T/Y	-0.833611	-0.650133	0	2	3	2	Promoter (<=1kb)	1	2627904	2632041	4138	2	ENSSSCT00000087178.1	-681	ENSSSCG00000049363	ENSSSCG00000049363
chr1:2632727	chr1	2632727	S1_2632727	A	C	A	C	0.57143	0.42857	0	2	0.28571	C	0.5	0.375	A	2	12698.4	2.47986e-08	-0.382421	0.432631	0.546628	0.467567	0.646698	0.46637	5	0.999843	1.42241	1.42241e-05	12.924	1.30512e-07	0.00224872	A/C/M	-0.849987	-0.0851463	0	3	2	2	Promoter (<=1kb)	1	2627904	2632041	4138	2	ENSSSCT00000087178.1	-686	ENSSSCG00000049363	ENSSSCG00000049363
chr1:2722983	chr1	2722983	S1_2722983	A	G	G	A	0.57143	0.42857	0	2	0.28571	A	0.5	0.375	G	2	12698.4	2.47986e-08	0.382421	0.432631	0.546628	0.467567	0.646698	0.46637	5	0.999843	1.42241	1.42241e-05	12.924	1.30512e-07	0.00224872	A/G/R	-0.0851463	-0.849987	0	2	3	2	Intron (ENSSSCT00000037176.2/ENSSSCG00000036609.2, intron 5 of 6)	1	2717165	2724976	7812	1	ENSSSCT00000037270.1	5818	ENSSSCG00000036609	ENSSSCG00000036609
chr1:2733685	chr1	2733685	S1_2733685	G	A	G	A	0.57143	0.42857	0	2	0.28571	A	0.5	0.375	G	2	12698.4	2.47986e-08	0.382421	0.432631	0.546628	0.467567	0.646698	0.46637	5	0.999843	1.42241	1.42241e-05	12.924	1.30512e-07	0.00224872	A/G/R	-0.0851463	-0.849987	0	2	3	2	Distal Intergenic	1	2717165	2724976	7812	1	ENSSSCT00000037270.1	16520	ENSSSCG00000036609	ENSSSCG00000036609
chr1:2744419	chr1	2744419	S1_2744419	C	T	C	T	0.66667	0.33333	0.14286	2	0.33333	T	0.1667	0.5	C	2	0.164278	0.855654	-0.502153	0.31648	0.61303	-0.397914	0.0911588	0.78243	4	0.0984122	1.11385	0.809932	11.9598	0.963921	1	C/T/Y	-0.104239	0.900067	0	3	1	2	Distal Intergenic	1	2717165	2724976	7812	1	ENSSSCT00000037270.1	27254	ENSSSCG00000036609	ENSSSCG00000036609
chr1:2744544	chr1	2744544	S1_2744544	G	C	G	C	0.57143	0.42857	0	2	0.28571	C	0.5	0.375	G	2	12698.4	2.47986e-08	0.382421	0.432631	0.546628	0.467567	0.646698	0.46637	5	0.999843	1.42241	1.42241e-05	12.924	1.30512e-07	0.00224872	C/G/S	-0.0851463	-0.849987	0	2	3	2	Distal Intergenic	1	2717165	2724976	7812	1	ENSSSCT00000037270.1	27379	ENSSSCG00000036609	ENSSSCG00000036609
chr1:2744568	chr1	2744568	S1_2744568	G	A	G	A	0.57143	0.42857	0	2	0.28571	A	0.5	0.375	G	2	12698.4	2.47986e-08	0.382421	0.432631	0.546628	0.467567	0.646698	0.46637	5	0.999843	1.42241	1.42241e-05	12.924	1.30512e-07	0.00224872	A/G/R	-0.0851463	-0.849987	0	2	3	2	Distal Intergenic	1	2717165	2724976	7812	1	ENSSSCT00000037270.1	27403	ENSSSCG00000036609	ENSSSCG00000036609
chr1:2756019	chr1	2756019	S1_2756019	G	A	G	A	0.57143	0.42857	0	2	0.28571	A	0.3333	0.5	G	2	0.210068	0.818934	-0.0917389	0.0189271	0.897223	0.741872	0.416133	0.554009	5	0.0950505	1.28332	0.339101	12.4088	0.940348	1	A/G/R	-0.833611	-0.650133	0	2	3	2	Distal Intergenic	1	2774647	2782990	8344	2	ENSSSCT00000047024.1	26971	ENSSSCG00000036448	ENSSSCG00000036448
chr1:2803300	chr1	2803300	S1_2803300	A	G	A	G	0.5	0.5	0	3	0.42857	G	0.5	0.5	A	2	0.099674	0.907311	-0.331935	0.198952	0.678648	0.0219613	0.000382415	0.985335	5	0.0474712	1.35305	0.355902	12.5324	0.989835	1	A/G/R	-0.353896	0.309973	0	2	2	3	Distal Intergenic	1	2775508	2792411	16904	2	ENSSSCT00000076848.1	-10889	ENSSSCG00000036448	ENSSSCG00000036448
chr1:2832082	chr1	2832082	S1_2832082	G	C	C	G	0.5	0.5	0	1	0.14286	C	0.6667	0.375	G	2	15750.4	1.612e-08	-0.0381688	0.00657309	0.939277	0.888172	3.55889	0.132284	5	0.999873	1.14681	1.14681e-05	12.5569	9.61171e-08	0.00146175	C/G/S	-0.926341	-0.850004	0	3	3	1	Intron (ENSSSCT00000089807.1/ENSSSCG00000049704.1, intron 1 of 1)	1	2827909	2870216	42308	1	ENSSSCT00000089807.1	4173	ENSSSCG00000049704	ENSSSCG00000049704
chr1:2832153	chr1	2832153	S1_2832153	A	G	A	G	0.5	0.5	0	1	0.14286	G	0.6667	0.375	A	2	15750.4	1.612e-08	0.0381688	0.00657309	0.939277	0.888172	3.55889	0.132284	5	0.999873	1.14681	1.14681e-05	12.5569	9.61171e-08	0.00146175	A/G/R	-0.850004	-0.926341	0	3	3	1	Intron (ENSSSCT00000089807.1/ENSSSCG00000049704.1, intron 1 of 1)	1	2827909	2870216	42308	1	ENSSSCT00000089807.1	4244	ENSSSCG00000049704	ENSSSCG00000049704
chr1:2891290	chr1	2891290	S1_2891290	A	G	A	G	0.58333	0.41667	0.14286	3	0.5	G	0.6667	0.1667	A	2	4.0269	0.141388	1.20847	6.55962	0.0831289	-0.14755	0.046888	0.842459	4	0.000757215	0.558974	5.58974e-06	8.64974	0.452701	1	A/G/R	1.35602	-1.06092	0	2	1	3	Promoter (2-3kb)	1	2893742	2893818	77	1	ENSSSCT00000051543.1	-2452	ENSSSCG00000034772	ENSSSCG00000034772
chr1:2894514	chr1	2894514	S1_2894514	T	C	T	C	0.57143	0.42857	0	4	0.57143	C	0.3333	0.5	T	2	12738.4	2.46428e-08	-0.0778834	0.0180035	0.899743	0.772105	1.76934	0.254237	5	0.999843	1.41793	1.41793e-05	13.317	1.30388e-07	0.00223459	C/T/Y	-0.849989	-0.694222	0	1	2	4	Promoter (<=1kb)	1	2893742	2893818	77	1	ENSSSCT00000051543.1	772	ENSSSCG00000034772	ENSSSCG00000034772
chr1:2946897	chr1	2946897	S1_2946897	T	C	C	T	0.57143	0.42857	0	2	0.28571	T	0.3333	0.5	C	2	0.210068	0.818934	0.0917389	0.0189271	0.897223	0.741872	0.416133	0.554009	5	0.0950505	1.28332	0.339101	12.4088	0.940348	1	C/T/Y	-0.650133	-0.833611	0	3	2	2	Distal Intergenic	1	2935358	2938451	3094	2	ENSSSCT00000077173.1	-8446	ENSSSCG00000048269	ENSSSCG00000048269
chr1:2986885	chr1	2986885	S1_2986885	A	G	A	G	0.71429	0.28571	0	2	0.28571	G	0.1667	0.375	A	2	17004.2	1.38308e-08	-0.354531	0.281992	0.623516	-1.20453	3.25499	0.145533	5	0.999882	1.06227	1.06227e-05	11.5932	9.56413e-08	0.00125416	A/G/R	0.849998	1.55906	0	4	1	2	Promoter (2-3kb)	1	2970435	2984769	14335	2	ENSSSCT00000072627.1	-2116	ENSSSCG00000048262	ENSSSCG00000048262
chr1:2987161	chr1	2987161	S1_2987161	G	T	T	G	0.58333	0.41667	0.14286	1	0.16667	G	0.3333	0.5	T	2	0.595619	0.605576	-0.0887148	0.0183415	0.900848	1.2144	1.19119	0.354902	4	0.000295383	1.47422	1.47422e-05	11.7364	0.829903	1	G/T/K	-1.30311	-1.12568	0	2	3	1	Promoter (2-3kb)	1	2970435	2984769	14335	2	ENSSSCT00000072627.1	-2392	ENSSSCG00000048262	ENSSSCG00000048262
chr1:2987190	chr1	2987190	S1_2987190	T	C	C	T	0.5	0.5	0	3	0.42857	C	0.5	0.5	T	2	0.099674	0.907311	0.331935	0.198952	0.678648	0.0219613	0.000382415	0.985335	5	0.0474712	1.35305	0.355902	12.5324	0.989835	1	C/T/Y	0.309973	-0.353896	0	2	2	3	Promoter (2-3kb)	1	2970435	2984769	14335	2	ENSSSCT00000072627.1	-2421	ENSSSCG00000048262	ENSSSCG00000048262
chr1:2987192	chr1	2987192	S1_2987192	T	A	A	T	0.5	0.5	0	3	0.42857	A	0.5	0.5	T	2	0.099674	0.907311	0.331935	0.198952	0.678648	0.0219613	0.000382415	0.985335	5	0.0474712	1.35305	0.355902	12.5324	0.989835	1	A/T/W	0.309973	-0.353896	0	2	2	3	Promoter (2-3kb)	1	2970435	2984769	14335	2	ENSSSCT00000072627.1	-2423	ENSSSCG00000048262	ENSSSCG00000048262
chr1:2987288	chr1	2987288	S1_2987288	T	C	C	T	0.64286	0.35714	0	1	0.14286	T	0.3333	0.375	C	2	12738.4	2.46428e-08	0.347111	0.35761	0.582048	-0.502878	0.750532	0.435181	5	0.999843	1.41793	1.41793e-05	13.317	1.30388e-07	0.00223459	C/T/Y	0.849989	0.155767	0	4	2	1	Promoter (2-3kb)	1	2970435	2984769	14335	2	ENSSSCT00000072627.1	-2519	ENSSSCG00000048262	ENSSSCG00000048262
chr1:2987315	chr1	2987315	S1_2987315	A	G	G	A	0.64286	0.35714	0	1	0.14286	A	0.3333	0.375	G	2	12738.4	2.46428e-08	-0.347111	0.35761	0.582048	-0.502878	0.750532	0.435181	5	0.999843	1.41793	1.41793e-05	13.317	1.30388e-07	0.00223459	A/G/R	0.155767	0.849989	0	2	4	1	Promoter (2-3kb)	1	2970435	2984769	14335	2	ENSSSCT00000072627.1	-2546	ENSSSCG00000048262	ENSSSCG00000048262
chr1:2987349	chr1	2987349	S1_2987349	A	G	G	A	0.64286	0.35714	0	1	0.14286	A	0.3333	0.375	G	2	12738.4	2.46428e-08	-0.347111	0.35761	0.582048	-0.502878	0.750532	0.435181	5	0.999843	1.41793	1.41793e-05	13.317	1.30388e-07	0.00223459	A/G/R	0.155767	0.849989	0	2	4	1	Promoter (2-3kb)	1	2970435	2984769	14335	2	ENSSSCT00000072627.1	-2580	ENSSSCG00000048262	ENSSSCG00000048262
chr1:3098793	chr1	3098793	S1_3098793	C	T	C	T	0.5	0.5	0	3	0.42857	T	0.5	0.5	C	2	0.099674	0.907311	-0.331935	0.198952	0.678648	0.0219613	0.000382415	0.985335	5	0.0474712	1.35305	0.355902	12.5324	0.989835	1	C/T/Y	-0.353896	0.309973	0	2	2	3	Distal Intergenic	1	3120223	3392651	272429	1	ENSSSCT00000041923.2	-21430	ENSSSCG00000004027	ENSSSCG00000004027
chr1:3311026	chr1	3311026	S1_3311026	G	A	A	G	0.5	0.5	0	1	0.14286	A	0.6667	0.375	G	2	15750.4	1.612e-08	-0.0381688	0.00657309	0.939277	0.888172	3.55889	0.132284	5	0.999873	1.14681	1.14681e-05	12.5569	9.61171e-08	0.00146175	A/G/R	-0.926341	-0.850004	0	3	3	1	Intron (ENSSSCT00000041923.2/ENSSSCG00000004027.4, intron 5 of 23)	1	3192598	3392651	200054	1	ENSSSCT00000071222.1	118428	ENSSSCG00000004027	ENSSSCG00000004027
chr1:3311065	chr1	3311065	S1_3311065	T	C	C	T	0.5	0.5	0	1	0.14286	C	0.6667	0.375	T	2	15750.4	1.612e-08	-0.0381688	0.00657309	0.939277	0.888172	3.55889	0.132284	5	0.999873	1.14681	1.14681e-05	12.5569	9.61171e-08	0.00146175	C/T/Y	-0.926341	-0.850004	0	3	3	1	Intron (ENSSSCT00000041923.2/ENSSSCG00000004027.4, intron 5 of 23)	1	3192598	3392651	200054	1	ENSSSCT00000071222.1	118467	ENSSSCG00000004027	ENSSSCG00000004027
chr1:3320467	chr1	3320467	S1_3320467	T	G	T	G	0.57143	0.42857	0	2	0.28571	G	0.5	0.375	T	2	12698.4	2.47986e-08	0.382421	0.432631	0.546628	0.467567	0.646698	0.46637	5	0.999843	1.42241	1.42241e-05	12.924	1.30512e-07	0.00224872	G/T/K	-0.0851463	-0.849987	0	2	3	2	Intron (ENSSSCT00000041923.2/ENSSSCG00000004027.4, intron 7 of 23)	1	3192598	3392651	200054	1	ENSSSCT00000071222.1	127869	ENSSSCG00000004027	ENSSSCG00000004027
chr1:3320508	chr1	3320508	S1_3320508	C	T	C	T	0.57143	0.42857	0	2	0.28571	T	0.5	0.375	C	2	12698.4	2.47986e-08	-0.382421	0.432631	0.546628	0.467567	0.646698	0.46637	5	0.999843	1.42241	1.42241e-05	12.924	1.30512e-07	0.00224872	C/T/Y	-0.849987	-0.0851463	0	3	2	2	Intron (ENSSSCT00000041923.2/ENSSSCG00000004027.4, intron 7 of 23)	1	3192598	3392651	200054	1	ENSSSCT00000071222.1	127910	ENSSSCG00000004027	ENSSSCG00000004027
chr1:3358622	chr1	3358622	S1_3358622	T	C	C	T	0.5	0.5	0	1	0.14286	C	0.6667	0.375	T	2	15750.4	1.612e-08	-0.0381688	0.00657309	0.939277	0.888172	3.55889	0.132284	5	0.999873	1.14681	1.14681e-05	12.5569	9.61171e-08	0.00146175	C/T/Y	-0.926341	-0.850004	0	3	3	1	Intron (ENSSSCT00000041923.2/ENSSSCG00000004027.4, intron 16 of 23)	1	3192598	3392651	200054	1	ENSSSCT00000071222.1	166024	ENSSSCG00000004027	ENSSSCG00000004027
chr1:3408973	chr1	3408973	S1_3408973	C	T	T	C	0.57143	0.42857	0	2	0.28571	C	0.3333	0.5	T	2	0.210068	0.818934	-0.0917389	0.0189271	0.897223	0.741872	0.416133	0.554009	5	0.0950505	1.28332	0.339101	12.4088	0.940348	1	C/T/Y	-0.833611	-0.650133	0	2	3	2	Distal Intergenic	1	3622845	3642194	19350	1	ENSSSCT00000069638.1	-213872	ENSSSCG00000044274	ENSSSCG00000044274
chr1:3408979	chr1	3408979	S1_3408979	C	G	G	C	0.57143	0.42857	0	2	0.28571	C	0.3333	0.5	G	2	0.210068	0.818934	-0.0917389	0.0189271	0.897223	0.741872	0.416133	0.554009	5	0.0950505	1.28332	0.339101	12.4088	0.940348	1	C/G/S	-0.833611	-0.650133	0	2	3	2	Distal Intergenic	1	3622845	3642194	19350	1	ENSSSCT00000069638.1	-213866	ENSSSCG00000044274	ENSSSCG00000044274
chr1:3471986	chr1	3471986	S1_3471986	C	T	T	C	0.58333	0.41667	0.14286	1	0.16667	C	0.3333	0.5	T	2	0.595619	0.605576	-0.0887148	0.0183415	0.900848	1.2144	1.19119	0.354902	4	0.000295383	1.47422	1.47422e-05	11.7364	0.829903	1	C/T/Y	-1.30311	-1.12568	0	2	3	1	Distal Intergenic	1	3622845	3642194	19350	1	ENSSSCT00000069638.1	-150859	ENSSSCG00000044274	ENSSSCG00000044274
chr1:3480315	chr1	3480315	S1_3480315	A	C	C	A	0.57143	0.42857	0	2	0.28571	A	0.3333	0.5	C	2	0.210068	0.818934	-0.0917389	0.0189271	0.897223	0.741872	0.416133	0.554009	5	0.0950505	1.28332	0.339101	12.4088	0.940348	1	A/C/M	-0.833611	-0.650133	0	2	3	2	Distal Intergenic	1	3622845	3642194	19350	1	ENSSSCT00000069638.1	-142530	ENSSSCG00000044274	ENSSSCG00000044274
chr1:3480422	chr1	3480422	S1_3480422	A	G	G	A	0.58333	0.41667	0.14286	1	0.16667	A	0.3333	0.5	G	2	0.595619	0.605576	-0.0887148	0.0183415	0.900848	1.2144	1.19119	0.354902	4	0.000295383	1.47422	1.47422e-05	11.7364	0.829903	1	A/G/R	-1.30311	-1.12568	0	2	3	1	Distal Intergenic	1	3622845	3642194	19350	1	ENSSSCT00000069638.1	-142423	ENSSSCG00000044274	ENSSSCG00000044274
chr1:3526619	chr1	3526619	S1_3526619	C	T	T	C	0.7	0.3	0.28571	1	0.2	C	0	0.5	T	2	0.42595	0.701287	0.462509	0.327159	0.625056	0.554605	0.202328	0.696899	3	0.28492	1.37998	1.37998e-05	6.89483	0.872885	1	C/T/Y	-0.0920958	-1.01711	0	1	3	1	Distal Intergenic	1	3622845	3642194	19350	1	ENSSSCT00000069638.1	-96226	ENSSSCG00000044274	ENSSSCG00000044274
chr1:3602289	chr1	3602289	S1_3602289	A	T	A	T	0.78571	0.21429	0	1	0.14286	T	0.3333	0.125	A	2	22494.2	7.90387e-09	0.69917	1.72184	0.259689	1.54917	8.45293	0.0437924	5	0.999911	0.803027	8.03027e-06	11.1154	7.34443e-08	0.000716715	A/T/W	-0.85	-2.24834	0	5	1	1	Distal Intergenic	1	3622845	3642194	19350	1	ENSSSCT00000069638.1	-20556	ENSSSCG00000044274	ENSSSCG00000044274
chr1:3646364	chr1	3646364	S1_3646364	A	G	A	G	0.7	0.3	0.28571	1	0.2	G	0.1667	0.5	A	2	2.24981	0.30771	-0.575066	1.8268	0.30908	-1.68675	2.75298	0.238941	3	0.580509	0.724287	7.24287e-06	5.55434	0.647602	1	A/G/R	1.11169	2.26182	0	3	1	1	Distal Intergenic	1	3622845	3642194	19350	1	ENSSSCT00000069638.1	23519	ENSSSCG00000044274	ENSSSCG00000044274
chr1:3653870	chr1	3653870	S1_3653870	C	G	C	G	0.57143	0.42857	0	2	0.28571	G	0.5	0.375	C	2	12698.4	2.47986e-08	-0.382421	0.432631	0.546628	0.467567	0.646698	0.46637	5	0.999843	1.42241	1.42241e-05	12.924	1.30512e-07	0.00224872	C/G/S	-0.849987	-0.0851463	0	3	2	2	Distal Intergenic	1	3622845	3642194	19350	1	ENSSSCT00000069638.1	31025	ENSSSCG00000044274	ENSSSCG00000044274
chr1:3653916	chr1	3653916	S1_3653916	G	A	G	A	0.57143	0.42857	0	2	0.28571	A	0.5	0.375	G	2	12698.4	2.47986e-08	0.382421	0.432631	0.546628	0.467567	0.646698	0.46637	5	0.999843	1.42241	1.42241e-05	12.924	1.30512e-07	0.00224872	A/G/R	-0.0851463	-0.849987	0	2	3	2	Distal Intergenic	1	3622845	3642194	19350	1	ENSSSCT00000069638.1	31071	ENSSSCG00000044274	ENSSSCG00000044274
chr1:3653942	chr1	3653942	S1_3653942	C	T	C	T	0.64286	0.35714	0	1	0.14286	T	0.1667	0.5	C	2	0.862715	0.488094	0.0640447	0.0247599	0.88259	-1.58308	1.65485	0.267708	5	0.301363	0.601691	0.555169	12.12	0.781202	1	C/T/Y	1.64712	1.51903	0	4	2	1	Distal Intergenic	1	3622845	3642194	19350	1	ENSSSCT00000069638.1	31097	ENSSSCG00000044274	ENSSSCG00000044274
chr1:3653946	chr1	3653946	S1_3653946	C	T	C	T	0.5	0.5	0	1	0.14286	T	0.6667	0.375	C	2	15750.4	1.612e-08	0.0381688	0.00657309	0.939277	0.888172	3.55889	0.132284	5	0.999873	1.14681	1.14681e-05	12.5569	9.61171e-08	0.00146175	C/T/Y	-0.850004	-0.926341	0	3	3	1	Distal Intergenic	1	3622845	3642194	19350	1	ENSSSCT00000069638.1	31101	ENSSSCG00000044274	ENSSSCG00000044274
chr1:3653981	chr1	3653981	S1_3653981	T	C	C	T	0.5	0.5	0	1	0.14286	C	0.6667	0.375	T	2	15750.4	1.612e-08	-0.0381688	0.00657309	0.939277	0.888172	3.55889	0.132284	5	0.999873	1.14681	1.14681e-05	12.5569	9.61171e-08	0.00146175	C/T/Y	-0.926341	-0.850004	0	3	3	1	Distal Intergenic	1	3622845	3642194	19350	1	ENSSSCT00000069638.1	31136	ENSSSCG00000044274	ENSSSCG00000044274
chr1:3666135	chr1	3666135	S1_3666135	C	T	T	C	0.64286	0.35714	0	1	0.14286	C	0.3333	0.375	T	2	12738.4	2.46428e-08	-0.347111	0.35761	0.582048	-0.502878	0.750532	0.435181	5	0.999843	1.41793	1.41793e-05	13.317	1.30388e-07	0.00223459	C/T/Y	0.155767	0.849989	0	2	4	1	Distal Intergenic	1	3622845	3642194	19350	1	ENSSSCT00000069638.1	43290	ENSSSCG00000044274	ENSSSCG00000044274
chr1:3838607	chr1	3838607	S1_3838607	G	A	G	A	0.57143	0.42857	0	2	0.28571	A	0.5	0.375	G	2	12698.4	2.47986e-08	0.382421	0.432631	0.546628	0.467567	0.646698	0.46637	5	0.999843	1.42241	1.42241e-05	12.924	1.30512e-07	0.00224872	A/G/R	-0.0851463	-0.849987	0	2	3	2	Distal Intergenic	1	3756447	3762499	6053	1	ENSSSCT00000083583.1	82160	ENSSSCG00000049643	ENSSSCG00000049643
chr1:3838655	chr1	3838655	S1_3838655	C	T	C	T	0.57143	0.42857	0	2	0.28571	T	0.5	0.375	C	2	12698.4	2.47986e-08	-0.382421	0.432631	0.546628	0.467567	0.646698	0.46637	5	0.999843	1.42241	1.42241e-05	12.924	1.30512e-07	0.00224872	C/T/Y	-0.849987	-0.0851463	0	3	2	2	Distal Intergenic	1	3756447	3762499	6053	1	ENSSSCT00000083583.1	82208	ENSSSCG00000049643	ENSSSCG00000049643
chr1:3842047	chr1	3842047	S1_3842047	G	A	A	G	0.5	0.5	0	3	0.42857	A	0.5	0.5	G	2	0.099674	0.907311	0.331935	0.198952	0.678648	0.0219613	0.000382415	0.985335	5	0.0474712	1.35305	0.355902	12.5324	0.989835	1	A/G/R	0.309973	-0.353896	0	2	2	3	Distal Intergenic	1	3756447	3762499	6053	1	ENSSSCT00000083583.1	85600	ENSSSCG00000049643	ENSSSCG00000049643
chr1:4045522	chr1	4045522	S1_4045522	A	C	C	A	0.57143	0.42857	0	2	0.28571	A	0.1667	0.625	C	2	0.092752	0.913323	0.188892	0.100309	0.7673	-0.327648	0.0942014	0.774217	5	0.0443206	0.289969	1.39035	13.5255	0.992746	1	A/C/M	0.51654	0.138756	0	2	3	2	Distal Intergenic	1	4253143	4262861	9719	1	ENSSSCT00000090551.1	-207621	ENSSSCG00000050396	ENSSSCG00000050396
chr1:4045583	chr1	4045583	S1_4045583	A	G	G	A	0.57143	0.42857	0	2	0.28571	A	0.1667	0.625	G	2	0.092752	0.913323	0.188892	0.100309	0.7673	-0.327648	0.0942014	0.774217	5	0.0443206	0.289969	1.39035	13.5255	0.992746	1	A/G/R	0.51654	0.138756	0	2	3	2	Distal Intergenic	1	4253143	4262861	9719	1	ENSSSCT00000090551.1	-207560	ENSSSCG00000050396	ENSSSCG00000050396
chr1:4127103	chr1	4127103	S1_4127103	A	G	A	G	0.75	0.25	0.14286	1	0.16667	G	0	0.5	A	2	1.12529	0.431887	-0.633132	0.781236	0.441856	0.736148	0.434909	0.556695	4	0.000445469	1.17678	1.17678e-05	11.0617	0.757801	1	A/G/R	-1.36928	-0.103016	0	4	1	1	Distal Intergenic	1	4253143	4262861	9719	1	ENSSSCT00000090551.1	-126040	ENSSSCG00000050396	ENSSSCG00000050396
chr1:4134651	chr1	4134651	S1_4134651	C	T	T	C	0.57143	0.42857	0	4	0.57143	C	0.3333	0.5	T	2	0.425446	0.67995	0.273739	0.109362	0.757469	-1.013	0.84526	0.409922	5	0.175409	1.06209	0.365009	11.9119	0.867529	1	C/T/Y	1.28674	0.739261	0	1	2	4	Distal Intergenic	1	4253143	4262861	9719	1	ENSSSCT00000090551.1	-118492	ENSSSCG00000050396	ENSSSCG00000050396
chr1:4154852	chr1	4154852	S1_4154852	C	G	C	G	0.58333	0.41667	0.14286	3	0.5	G	0.3333	0.5	C	2	0.366597	0.720379	0.285002	0.123744	0.748267	-0.748326	0.451651	0.549679	4	0.196399	1.7504e-05	1.7504	11.4096	0.883912	1	C/G/S	1.03333	0.463324	0	2	1	3	Distal Intergenic	1	4253143	4262861	9719	1	ENSSSCT00000090551.1	-98291	ENSSSCG00000050396	ENSSSCG00000050396
chr1:4222028	chr1	4222028	S1_4222028	C	T	C	T	0.5	0.5	0	3	0.42857	T	0.6667	0.375	C	2	0.592475	0.595156	-0.0400014	0.00446687	0.949921	-0.993325	1.18048	0.33835	5	0.228536	1.43285e-05	1.43285	12.7902	0.823633	1	C/T/Y	0.953324	1.03333	0	2	2	3	Distal Intergenic	1	4253143	4262861	9719	1	ENSSSCT00000090551.1	-31115	ENSSSCG00000050396	ENSSSCG00000050396
chr1:4222058	chr1	4222058	S1_4222058	G	A	A	G	0.5	0.5	0	3	0.42857	A	0.6667	0.375	G	2	0.592475	0.595156	0.0400014	0.00446687	0.949921	-0.993325	1.18048	0.33835	5	0.228536	1.43285e-05	1.43285	12.7902	0.823633	1	A/G/R	1.03333	0.953324	0	2	2	3	Distal Intergenic	1	4253143	4262861	9719	1	ENSSSCT00000090551.1	-31085	ENSSSCG00000050396	ENSSSCG00000050396
chr1:4231679	chr1	4231679	S1_4231679	C	T	C	T	0.78571	0.21429	0	1	0.14286	T	0.1667	0.25	C	2	18358.8	1.18652e-08	0.424996	36715.8	4.45006e-09	-1.3561	1.3217	0.31435	5	0.999891	0.983893	9.83893e-06	11.9279	8.89569e-08	0.00107593	C/T/Y	1.78109	0.931103	0	5	1	1	Distal Intergenic	1	4253143	4262861	9719	1	ENSSSCT00000090551.1	-21464	ENSSSCG00000050396	ENSSSCG00000050396
chr1:4231691	chr1	4231691	S1_4231691	C	T	C	T	0.78571	0.21429	0	1	0.14286	T	0.1667	0.25	C	2	18358.8	1.18652e-08	0.424996	36715.8	4.45006e-09	-1.3561	1.3217	0.31435	5	0.999891	0.983893	9.83893e-06	11.9279	8.89569e-08	0.00107593	C/T/Y	1.78109	0.931103	0	5	1	1	Distal Intergenic	1	4253143	4262861	9719	1	ENSSSCT00000090551.1	-21452	ENSSSCG00000050396	ENSSSCG00000050396
chr1:4485936	chr1	4485936	S1_4485936	C	T	C	T	0.75	0.25	0.14286	1	0.16667	T	0	0.5	C	2	15349.5	9.65898e-07	-0.25964	0.266265	0.64147	1.10964	4.86312	0.114609	4	0.999902	1.17678	1.17678e-05	11.0617	4.64355e-06	0.0875866	C/T/Y	-1.36928	-0.85	0	4	1	1	Distal Intergenic	1	4377441	4388222	10782	1	ENSSSCT00000086040.1	108495	ENSSSCG00000042992	ENSSSCG00000042992
chr1:4485941	chr1	4485941	S1_4485941	A	G	A	G	0.75	0.25	0.14286	1	0.16667	G	0	0.5	A	2	15349.5	9.65898e-07	-0.25964	0.266265	0.64147	1.10964	4.86312	0.114609	4	0.999902	1.17678	1.17678e-05	11.0617	4.64355e-06	0.0875866	A/G/R	-1.36928	-0.85	0	4	1	1	Distal Intergenic	1	4377441	4388222	10782	1	ENSSSCT00000086040.1	108500	ENSSSCG00000042992	ENSSSCG00000042992
chr1:4485964	chr1	4485964	S1_4485964	A	G	A	G	0.75	0.25	0.14286	1	0.16667	G	0	0.5	A	2	15349.5	9.65898e-07	-0.25964	0.266265	0.64147	1.10964	4.86312	0.114609	4	0.999902	1.17678	1.17678e-05	11.0617	4.64355e-06	0.0875866	A/G/R	-1.36928	-0.85	0	4	1	1	Distal Intergenic	1	4377441	4388222	10782	1	ENSSSCT00000086040.1	108523	ENSSSCG00000042992	ENSSSCG00000042992
chr1:4486184	chr1	4486184	S1_4486184	A	G	A	G	0.75	0.25	0.14286	1	0.16667	G	0.1667	0.3333	A	2	0.956687	0.477103	-0.266494	0.129566	0.742731	-1.95307	1.90092	0.261794	4	0.000404716	1.25755	1.25755e-05	10.7261	0.781202	1	A/G/R	1.68657	2.21956	0	4	1	1	Distal Intergenic	1	4377441	4388222	10782	1	ENSSSCT00000086040.1	108743	ENSSSCG00000042992	ENSSSCG00000042992
chr1:4598684	chr1	4598684	S1_4598684	A	G	A	G	0.71429	0.28571	0	2	0.28571	G	0.1667	0.375	A	2	17004.2	1.38308e-08	-0.354531	0.281992	0.623516	-1.20453	3.25499	0.145533	5	0.999882	1.06227	1.06227e-05	11.5932	9.56413e-08	0.00125416	A/G/R	0.849998	1.55906	0	4	1	2	Distal Intergenic	1	4377441	4388222	10782	1	ENSSSCT00000086040.1	221243	ENSSSCG00000042992	ENSSSCG00000042992
chr1:4650005	chr1	4650005	S1_4650005	T	C	T	C	0.7	0.3	0.28571	1	0.2	C	0	0.5	T	2	0.42595	0.701287	0.462509	0.327159	0.625056	0.554605	0.202328	0.696899	3	0.28492	1.37998	1.37998e-05	6.89483	0.872885	1	C/T/Y	-0.0920958	-1.01711	0	1	3	1	Distal Intergenic	1	4739100	4883338	144239	2	ENSSSCT00000042383.2	233333	ENSSSCG00000004029	ENSSSCG00000004029
chr1:4658925	chr1	4658925	S1_4658925	A	G	A	G	0.6	0.4	0.28571	2	0.4	G	0.25	0.5	A	2	0.0690706	0.935392	-0.234373	0.0597485	0.829684	-0.467413	0.113113	0.768636	3	0.0643024	1.41486	0.497919	7.12555	1	1	A/G/R	0.23304	0.701785	0	2	1	2	Distal Intergenic	1	4739100	4883338	144239	2	ENSSSCT00000042383.2	224413	ENSSSCG00000004029	ENSSSCG00000004029
chr1:4689977	chr1	4689977	S1_4689977	A	G	A	G	0.57143	0.42857	0	2	0.28571	G	0.5	0.375	A	2	12698.4	2.47986e-08	-0.382421	0.432631	0.546628	0.467567	0.646698	0.46637	5	0.999843	1.42241	1.42241e-05	12.924	1.30512e-07	0.00224872	A/G/R	-0.849987	-0.0851463	0	3	2	2	Distal Intergenic	1	4739100	4883338	144239	2	ENSSSCT00000042383.2	193361	ENSSSCG00000004029	ENSSSCG00000004029
chr1:4689991	chr1	4689991	S1_4689991	C	T	C	T	0.57143	0.42857	0	2	0.28571	T	0.5	0.375	C	2	12698.4	2.47986e-08	-0.382421	0.432631	0.546628	0.467567	0.646698	0.46637	5	0.999843	1.42241	1.42241e-05	12.924	1.30512e-07	0.00224872	C/T/Y	-0.849987	-0.0851463	0	3	2	2	Distal Intergenic	1	4739100	4883338	144239	2	ENSSSCT00000042383.2	193347	ENSSSCG00000004029	ENSSSCG00000004029
chr1:4690046	chr1	4690046	S1_4690046	C	T	C	T	0.57143	0.42857	0	2	0.28571	T	0.5	0.375	C	2	12698.4	2.47986e-08	-0.382421	0.432631	0.546628	0.467567	0.646698	0.46637	5	0.999843	1.42241	1.42241e-05	12.924	1.30512e-07	0.00224872	C/T/Y	-0.849987	-0.0851463	0	3	2	2	Distal Intergenic	1	4739100	4883338	144239	2	ENSSSCT00000042383.2	193292	ENSSSCG00000004029	ENSSSCG00000004029
chr1:4706644	chr1	4706644	S1_4706644	C	T	C	T	0.57143	0.42857	0	4	0.57143	T	0.3333	0.5	C	2	0.128307	0.883062	0.309249	0.167149	0.7036	-0.239248	0.0640846	0.812631	5	0.0602861	0.465364	1.13963	13.453	0.971372	1	C/T/Y	0.548497	-0.0700016	0	2	1	4	Distal Intergenic	1	4739100	4883338	144239	2	ENSSSCT00000042383.2	176694	ENSSSCG00000004029	ENSSSCG00000004029
chr1:4706802	chr1	4706802	S1_4706802	C	T	T	C	0.6	0.4	0.28571	2	0.4	C	0.25	0.5	T	2	0.0690706	0.935392	0.234373	0.0597485	0.829684	-0.467413	0.113113	0.768636	3	0.0643024	1.41486	0.497919	7.12555	1	1	C/T/Y	0.701785	0.23304	0	1	2	2	Distal Intergenic	1	4739100	4883338	144239	2	ENSSSCT00000042383.2	176536	ENSSSCG00000004029	ENSSSCG00000004029
chr1:4920456	chr1	4920456	S1_4920456	G	A	G	A	0.57143	0.42857	0	4	0.57143	A	0.3333	0.5	G	2	0.425446	0.67995	0.273739	0.109362	0.757469	-1.013	0.84526	0.409922	5	0.175409	1.06209	0.365009	11.9119	0.867529	1	A/G/R	1.28674	0.739261	0	1	2	4	Intron (ENSSSCT00000083407.1/ENSSSCG00000050646.1, intron 1 of 1)	1	4904571	4917254	12684	2	ENSSSCT00000069989.1	-3202	ENSSSCG00000050646	ENSSSCG00000050646
chr1:4934765	chr1	4934765	S1_4934765	C	T	C	T	0.57143	0.42857	0	4	0.57143	T	0.3333	0.5	C	2	0.425446	0.67995	-0.273739	0.109362	0.757469	-1.013	0.84526	0.409922	5	0.175409	1.06209	0.365009	11.9119	0.867529	1	C/T/Y	0.739261	1.28674	0	2	1	4	Distal Intergenic	1	4939720	4947658	7939	1	ENSSSCT00000072453.1	-4955	ENSSSCG00000048046	ENSSSCG00000048046
chr1:4934769	chr1	4934769	S1_4934769	A	G	A	G	0.57143	0.42857	0	4	0.57143	G	0.3333	0.5	A	2	0.425446	0.67995	-0.273739	0.109362	0.757469	-1.013	0.84526	0.409922	5	0.175409	1.06209	0.365009	11.9119	0.867529	1	A/G/R	0.739261	1.28674	0	2	1	4	Distal Intergenic	1	4939720	4947658	7939	1	ENSSSCT00000072453.1	-4951	ENSSSCG00000048046	ENSSSCG00000048046
chr1:4934771	chr1	4934771	S1_4934771	G	A	G	A	0.57143	0.42857	0	4	0.57143	A	0.3333	0.5	G	2	0.425446	0.67995	0.273739	0.109362	0.757469	-1.013	0.84526	0.409922	5	0.175409	1.06209	0.365009	11.9119	0.867529	1	A/G/R	1.28674	0.739261	0	1	2	4	Distal Intergenic	1	4939720	4947658	7939	1	ENSSSCT00000072453.1	-4949	ENSSSCG00000048046	ENSSSCG00000048046
chr1:4935431	chr1	4935431	S1_4935431	T	C	T	C	0.57143	0.42857	0	4	0.57143	C	0.3333	0.5	T	2	0.425446	0.67995	0.273739	0.109362	0.757469	-1.013	0.84526	0.409922	5	0.175409	1.06209	0.365009	11.9119	0.867529	1	C/T/Y	1.28674	0.739261	0	1	2	4	Distal Intergenic	1	4939720	4947658	7939	1	ENSSSCT00000072453.1	-4289	ENSSSCG00000048046	ENSSSCG00000048046
chr1:4935595	chr1	4935595	S1_4935595	C	T	C	T	0.58333	0.41667	0.14286	3	0.5	T	0.3333	0.5	C	2	0.618535	0.595777	-0.205001	0.0640231	0.816594	-1.23833	1.23677	0.347194	4	0.291964	1.7504e-05	1.7504	11.4096	0.823633	1	C/T/Y	1.03333	1.44333	0	2	1	3	Distal Intergenic	1	4939720	4947658	7939	1	ENSSSCT00000072453.1	-4125	ENSSSCG00000048046	ENSSSCG00000048046
chr1:4935619	chr1	4935619	S1_4935619	C	A	C	A	0.58333	0.41667	0.14286	3	0.5	A	0.3333	0.5	C	2	0.618535	0.595777	0.205001	0.0640231	0.816594	-1.23833	1.23677	0.347194	4	0.291964	1.7504e-05	1.7504	11.4096	0.823633	1	A/C/M	1.44333	1.03333	0	1	2	3	Distal Intergenic	1	4939720	4947658	7939	1	ENSSSCT00000072453.1	-4101	ENSSSCG00000048046	ENSSSCG00000048046
chr1:4935624	chr1	4935624	S1_4935624	A	G	A	G	0.58333	0.41667	0.14286	3	0.5	G	0.3333	0.5	A	2	0.618535	0.595777	-0.205001	0.0640231	0.816594	-1.23833	1.23677	0.347194	4	0.291964	1.7504e-05	1.7504	11.4096	0.823633	1	A/G/R	1.03333	1.44333	0	2	1	3	Distal Intergenic	1	4939720	4947658	7939	1	ENSSSCT00000072453.1	-4096	ENSSSCG00000048046	ENSSSCG00000048046
chr1:4960712	chr1	4960712	S1_4960712	T	C	T	C	0.78571	0.21429	0	1	0.14286	C	0.1667	0.25	T	2	18358.8	1.18652e-08	-0.424996	36715.8	4.45006e-09	-1.3561	1.3217	0.31435	5	0.999891	0.983893	9.83893e-06	11.9279	8.89569e-08	0.00107593	C/T/Y	0.931103	1.78109	0	1	5	1	Distal Intergenic	1	4939720	4947658	7939	1	ENSSSCT00000072453.1	20992	ENSSSCG00000048046	ENSSSCG00000048046
chr1:5155797	chr1	5155797	S1_5155797	C	T	C	T	0.71429	0.28571	0	2	0.28571	T	0.5	0.125	C	2	1.16962	0.398149	0.914998	2.286	0.205084	0.340007	0.121406	0.745081	5	0.36901	1.17195e-05	1.17195	11.9862	0.727707	1	C/T/Y	0.574991	-1.255	0	4	1	2	Intron (ENSSSCT00000057322.2/ENSSSCG00000038153.2, intron 4 of 4)	1	5348804	5354009	5206	1	ENSSSCT00000067430.1	-193007	ENSSSCG00000047165	ENSSSCG00000047165
chr1:6386294	chr1	6386294	S1_6386294	G	A	A	G	0.5	0.5	0	1	0.14286	G	0.5	0.5	A	2	13294.2	2.26258e-08	0.424993	26588.1	8.4853e-09	-0.715408	0.27005	0.630731	5	0.99985	1.35866	1.35866e-05	12.6448	1.22518e-07	0.00205169	A/G/R	1.1404	0.290415	0	3	3	1	Intron (ENSSSCT00000069514.1/ENSSSCG00000004032.4, intron 4 of 8)	1	6345831	6350036	4206	2	ENSSSCT00000066800.1	-36258	ENSSSCG00000045965	ENSSSCG00000045965
chr1:6386320	chr1	6386320	S1_6386320	A	C	A	C	0.5	0.5	0	1	0.14286	A	0.5	0.5	C	2	13294.2	2.26258e-08	-0.424993	26588.1	8.4853e-09	-0.715408	0.27005	0.630731	5	0.99985	1.35866	1.35866e-05	12.6448	1.22518e-07	0.00205169	A/C/M	0.290415	1.1404	0	3	3	1	Intron (ENSSSCT00000069514.1/ENSSSCG00000004032.4, intron 4 of 8)	1	6345831	6350036	4206	2	ENSSSCT00000066800.1	-36284	ENSSSCG00000045965	ENSSSCG00000045965
chr1:6386328	chr1	6386328	S1_6386328	G	A	G	A	0.64286	0.35714	0	3	0.42857	A	0.3333	0.375	G	2	16252.3	1.51399e-08	0.425001	32504.2	5.67784e-09	-0.753334	0.70661	0.447884	5	0.999877	1.1114	1.1114e-05	12.4989	9.61171e-08	0.00137287	A/G/R	1.17834	0.328333	0	1	3	3	Intron (ENSSSCT00000069514.1/ENSSSCG00000004032.4, intron 4 of 8)	1	6345831	6350036	4206	2	ENSSSCT00000066800.1	-36292	ENSSSCG00000045965	ENSSSCG00000045965
chr1:6386494	chr1	6386494	S1_6386494	C	A	A	C	0.57143	0.42857	0	2	0.28571	C	0.5	0.375	A	2	13507.8	2.19161e-08	0.245101	0.203204	0.675502	-0.604892	1.23759	0.328285	5	0.999852	1.33719	1.33719e-05	12.7491	1.19784e-07	0.00198733	A/C/M	0.849993	0.359791	0	3	2	2	Intron (ENSSSCT00000069514.1/ENSSSCG00000004032.4, intron 4 of 8)	1	6345831	6350036	4206	2	ENSSSCT00000066800.1	-36458	ENSSSCG00000045965	ENSSSCG00000045965
chr1:6386506	chr1	6386506	S1_6386506	A	G	A	G	0.57143	0.42857	0	2	0.28571	G	0.5	0.375	A	2	13507.8	2.19161e-08	0.245101	0.203204	0.675502	-0.604892	1.23759	0.328285	5	0.999852	1.33719	1.33719e-05	12.7491	1.19784e-07	0.00198733	A/G/R	0.849993	0.359791	0	3	2	2	Intron (ENSSSCT00000069514.1/ENSSSCG00000004032.4, intron 4 of 8)	1	6345831	6350036	4206	2	ENSSSCT00000066800.1	-36470	ENSSSCG00000045965	ENSSSCG00000045965
chr1:6386516	chr1	6386516	S1_6386516	A	G	A	G	0.57143	0.42857	0	4	0.57143	G	0.3333	0.5	A	2	0.206258	0.821765	-0.463395	0.281631	0.62373	-0.593336	0.259053	0.637562	5	0.0934876	1.24968	0.356721	12.3215	0.940348	1	A/G/R	0.12994	1.05673	0	2	1	4	Intron (ENSSSCT00000069514.1/ENSSSCG00000004032.4, intron 4 of 8)	1	6345831	6350036	4206	2	ENSSSCT00000066800.1	-36480	ENSSSCG00000045965	ENSSSCG00000045965
chr1:6386577	chr1	6386577	S1_6386577	G	A	G	A	0.57143	0.42857	0	2	0.28571	A	0.5	0.375	G	2	13507.8	2.19161e-08	-0.245101	0.203204	0.675502	-0.604892	1.23759	0.328285	5	0.999852	1.33719	1.33719e-05	12.7491	1.19784e-07	0.00198733	A/G/R	0.359791	0.849993	0	2	3	2	Intron (ENSSSCT00000069514.1/ENSSSCG00000004032.4, intron 4 of 8)	1	6345831	6350036	4206	2	ENSSSCT00000066800.1	-36541	ENSSSCG00000045965	ENSSSCG00000045965
chr1:6388763	chr1	6388763	S1_6388763	A	G	G	A	0.57143	0.42857	0	2	0.28571	A	0.5	0.375	G	2	13507.8	2.19161e-08	-0.245101	0.203204	0.675502	-0.604892	1.23759	0.328285	5	0.999852	1.33719	1.33719e-05	12.7491	1.19784e-07	0.00198733	A/G/R	0.359791	0.849993	0	2	3	2	Intron (ENSSSCT00000069514.1/ENSSSCG00000004032.4, intron 4 of 8)	1	6345831	6350036	4206	2	ENSSSCT00000066800.1	-38727	ENSSSCG00000045965	ENSSSCG00000045965
chr1:6388765	chr1	6388765	S1_6388765	A	G	G	A	0.57143	0.42857	0	2	0.28571	A	0.5	0.375	G	2	13507.8	2.19161e-08	-0.245101	0.203204	0.675502	-0.604892	1.23759	0.328285	5	0.999852	1.33719	1.33719e-05	12.7491	1.19784e-07	0.00198733	A/G/R	0.359791	0.849993	0	2	3	2	Intron (ENSSSCT00000069514.1/ENSSSCG00000004032.4, intron 4 of 8)	1	6345831	6350036	4206	2	ENSSSCT00000066800.1	-38729	ENSSSCG00000045965	ENSSSCG00000045965
chr1:6388857	chr1	6388857	S1_6388857	G	A	G	A	0.57143	0.42857	0	2	0.28571	A	0.5	0.375	G	2	13507.8	2.19161e-08	-0.245101	0.203204	0.675502	-0.604892	1.23759	0.328285	5	0.999852	1.33719	1.33719e-05	12.7491	1.19784e-07	0.00198733	A/G/R	0.359791	0.849993	0	2	3	2	Intron (ENSSSCT00000069514.1/ENSSSCG00000004032.4, intron 4 of 8)	1	6345831	6350036	4206	2	ENSSSCT00000066800.1	-38821	ENSSSCG00000045965	ENSSSCG00000045965
chr1:6403588	chr1	6403588	S1_6403588	T	C	T	C	0.58333	0.41667	0.14286	3	0.5	C	0.5	0.375	T	2	2.24856	0.253128	-0.672503	1.76298	0.276242	-0.892495	1.64386	0.289895	4	0.599847	6.84078e-06	0.684078	8.59101	0.578769	1	C/T/Y	0.219992	1.565	0	1	2	3	Intron (ENSSSCT00000069514.1/ENSSSCG00000004032.4, intron 4 of 8)	1	6345831	6350036	4206	2	ENSSSCT00000066800.1	-53552	ENSSSCG00000045965	ENSSSCG00000045965
chr1:6403622	chr1	6403622	S1_6403622	C	T	C	T	0.58333	0.41667	0.14286	3	0.5	T	0.5	0.375	C	2	2.24856	0.253128	0.672503	1.76298	0.276242	-0.892495	1.64386	0.289895	4	0.599847	6.84078e-06	0.684078	8.59101	0.578769	1	C/T/Y	1.565	0.219992	0	2	1	3	Intron (ENSSSCT00000069514.1/ENSSSCG00000004032.4, intron 4 of 8)	1	6345831	6350036	4206	2	ENSSSCT00000066800.1	-53586	ENSSSCG00000045965	ENSSSCG00000045965
chr1:6403634	chr1	6403634	S1_6403634	T	C	T	C	0.58333	0.41667	0.14286	3	0.5	C	0.5	0.375	T	2	2.24856	0.253128	-0.672503	1.76298	0.276242	-0.892495	1.64386	0.289895	4	0.599847	6.84078e-06	0.684078	8.59101	0.578769	1	C/T/Y	0.219992	1.565	0	1	2	3	Intron (ENSSSCT00000069514.1/ENSSSCG00000004032.4, intron 4 of 8)	1	6345831	6350036	4206	2	ENSSSCT00000066800.1	-53598	ENSSSCG00000045965	ENSSSCG00000045965
chr1:6429287	chr1	6429287	S1_6429287	C	T	C	T	0.64286	0.35714	0	3	0.42857	T	0.1667	0.5	C	2	17827.4	1.25831e-08	-0.73803	1.28117	0.320939	0.111969	0.0294878	0.871995	5	0.999888	1.01322	1.01322e-05	11.2863	9.15159e-08	0.00114102	C/T/Y	-0.849999	0.626062	0	3	1	3	Intron (ENSSSCT00000069514.1/ENSSSCG00000004032.4, intron 4 of 8)	1	6345831	6350036	4206	2	ENSSSCT00000066800.1	-79251	ENSSSCG00000045965	ENSSSCG00000045965
chr1:6454893	chr1	6454893	S1_6454893	G	A	G	A	0.78571	0.21429	0	1	0.14286	A	0.1667	0.25	G	2	16599.7	1.4513e-08	0.425001	33199	5.44271e-09	-1.00625	0.667065	0.459926	5	0.99988	1.08815	1.08815e-05	12.3445	9.56413e-08	0.00131602	A/G/R	1.43125	0.581245	0	1	5	1	Intron (ENSSSCT00000069514.1/ENSSSCG00000004032.4, intron 4 of 8)	1	6345831	6350036	4206	2	ENSSSCT00000066800.1	-104857	ENSSSCG00000045965	ENSSSCG00000045965
chr1:6666799	chr1	6666799	S1_6666799	G	A	G	A	0.64286	0.35714	0	1	0.14286	A	0.3333	0.375	G	2	0.839852	0.495985	-0.0750256	0.020336	0.893497	1.82747	1.67942	0.264722	5	0.295738	0.820639	0.368955	11.291	0.781202	1	A/G/R	-1.9025	-1.75245	0	2	4	1	Intron (ENSSSCT00000069514.1/ENSSSCG00000004032.4, intron 6 of 8)	1	6738100	6745159	7060	2	ENSSSCT00000083258.1	78360	ENSSSCG00000048582	ENSSSCG00000048582
chr1:6666837	chr1	6666837	S1_6666837	T	C	T	C	0.64286	0.35714	0	1	0.14286	C	0.3333	0.375	T	2	0.839852	0.495985	-0.0750256	0.020336	0.893497	1.82747	1.67942	0.264722	5	0.295738	0.820639	0.368955	11.291	0.781202	1	C/T/Y	-1.9025	-1.75245	0	2	4	1	Intron (ENSSSCT00000069514.1/ENSSSCG00000004032.4, intron 6 of 8)	1	6738100	6745159	7060	2	ENSSSCT00000083258.1	78322	ENSSSCG00000048582	ENSSSCG00000048582
chr1:6677997	chr1	6677997	S1_6677997	G	A	G	A	0.66667	0.33333	0.14286	2	0.33333	A	0.3333	0.3333	G	2	3.06349	0.188448	0.171554	0.153972	0.720985	-1.80891	5.94567	0.0926345	4	0.000697669	0.676981	6.76981e-06	9.45087	0.518848	1	A/G/R	1.98046	1.63735	0	1	3	2	Intron (ENSSSCT00000069514.1/ENSSSCG00000004032.4, intron 6 of 8)	1	6738100	6745159	7060	2	ENSSSCT00000083258.1	67162	ENSSSCG00000048582	ENSSSCG00000048582
chr1:6678209	chr1	6678209	S1_6678209	G	T	G	T	0.64286	0.35714	0	1	0.14286	T	0.5	0.25	G	2	0.753115	0.52773	0.377495	0.563282	0.494678	-1.0925	0.744926	0.436765	5	0.27355	1.34925e-05	1.34925	12.5497	0.794534	1	G/T/K	1.47	0.715006	0	4	2	1	Intron (ENSSSCT00000069514.1/ENSSSCG00000004032.4, intron 6 of 8)	1	6738100	6745159	7060	2	ENSSSCT00000083258.1	66950	ENSSSCG00000048582	ENSSSCG00000048582
chr1:6824810	chr1	6824810	S1_6824810	A	G	A	G	0.58333	0.41667	0.14286	3	0.5	G	0.5	0.3333	A	2	0.35643	0.726305	0.429354	0.386942	0.577984	0.820141	0.577991	0.502391	4	0.0972461	1.23753	1.23753e-05	10.9513	0.888735	1	A/G/R	-0.390787	-1.24949	0	2	1	3	Intron (ENSSSCT00000004461.4/ENSSSCG00000004033.4, intron 2 of 7)	1	6798928	6883555	84628	1	ENSSSCT00000070003.1	25882	ENSSSCG00000004033	ENSSSCG00000004033
chr1:6859077	chr1	6859077	S1_6859077	G	C	G	C	0.78571	0.21429	0	1	0.14286	C	0.1667	0.25	G	2	0.972611	0.452672	0.858167	1.57081	0.27835	-1.34939	1.06226	0.360938	5	0.327191	0.735771	0.389701	11.2456	0.769888	1	C/G/S	2.20756	0.491223	0	1	5	1	Intron (ENSSSCT00000004461.4/ENSSSCG00000004033.4, intron 2 of 7)	1	6798928	6883555	84628	1	ENSSSCT00000070003.1	60149	ENSSSCG00000004033	ENSSSCG00000004033
chr1:6859085	chr1	6859085	S1_6859085	C	T	C	T	0.78571	0.21429	0	1	0.14286	T	0.1667	0.25	C	2	0.972611	0.452672	-0.858167	1.57081	0.27835	-1.34939	1.06226	0.360938	5	0.327191	0.735771	0.389701	11.2456	0.769888	1	C/T/Y	0.491223	2.20756	0	5	1	1	Intron (ENSSSCT00000004461.4/ENSSSCG00000004033.4, intron 2 of 7)	1	6798928	6883555	84628	1	ENSSSCT00000070003.1	60157	ENSSSCG00000004033	ENSSSCG00000004033
chr1:6859183	chr1	6859183	S1_6859183	A	G	A	G	0.5	0.5	0.14286	4	0.66667	A	0.3333	0.6667	G	2	1.50887	0.351991	1.325	2.84895	0.190018	-0.394998	0.168792	0.708771	4	0.501474	1.23245e-05	1.23245	10.3571	0.696766	1	A/G/R	1.72	-0.930001	0	1	1	4	Intron (ENSSSCT00000004461.4/ENSSSCG00000004033.4, intron 2 of 7)	1	6798928	6883555	84628	1	ENSSSCT00000070003.1	60255	ENSSSCG00000004033	ENSSSCG00000004033
chr1:6860930	chr1	6860930	S1_6860930	G	C	G	C	0.71429	0.28571	0	2	0.28571	C	0.1667	0.375	G	2	20483.6	9.53156e-09	1.03249	2.60105	0.182089	-0.182499	0.0812612	0.789746	5	0.999902	0.881845	8.81845e-06	10.7464	8.28921e-08	0.000864313	C/G/S	1.21499	-0.849993	0	1	4	2	Intron (ENSSSCT00000004461.4/ENSSSCG00000004033.4, intron 2 of 7)	1	6798928	6883555	84628	1	ENSSSCT00000070003.1	62002	ENSSSCG00000004033	ENSSSCG00000004033
chr1:6860961	chr1	6860961	S1_6860961	G	A	G	A	0.71429	0.28571	0	2	0.28571	A	0.1667	0.375	G	2	20483.6	9.53156e-09	1.03249	2.60105	0.182089	-0.182499	0.0812612	0.789746	5	0.999902	0.881845	8.81845e-06	10.7464	8.28921e-08	0.000864313	A/G/R	1.21499	-0.849993	0	1	4	2	Intron (ENSSSCT00000004461.4/ENSSSCG00000004033.4, intron 2 of 7)	1	6798928	6883555	84628	1	ENSSSCT00000070003.1	62033	ENSSSCG00000004033	ENSSSCG00000004033
chr1:6860962	chr1	6860962	S1_6860962	G	A	G	A	0.71429	0.28571	0	2	0.28571	A	0.1667	0.375	G	2	20483.6	9.53156e-09	1.03249	2.60105	0.182089	-0.182499	0.0812612	0.789746	5	0.999902	0.881845	8.81845e-06	10.7464	8.28921e-08	0.000864313	A/G/R	1.21499	-0.849993	0	1	4	2	Intron (ENSSSCT00000004461.4/ENSSSCG00000004033.4, intron 2 of 7)	1	6798928	6883555	84628	1	ENSSSCT00000070003.1	62034	ENSSSCG00000004033	ENSSSCG00000004033
chr1:6860972	chr1	6860972	S1_6860972	A	G	A	G	0.71429	0.28571	0	2	0.28571	G	0.1667	0.375	A	2	20483.6	9.53156e-09	-1.03249	2.60105	0.182089	-0.182499	0.0812612	0.789746	5	0.999902	0.881845	8.81845e-06	10.7464	8.28921e-08	0.000864313	A/G/R	-0.849993	1.21499	0	4	1	2	Intron (ENSSSCT00000004461.4/ENSSSCG00000004033.4, intron 2 of 7)	1	6798928	6883555	84628	1	ENSSSCT00000070003.1	62044	ENSSSCG00000004033	ENSSSCG00000004033
chr1:6860973	chr1	6860973	S1_6860973	A	G	A	G	0.71429	0.28571	0	2	0.28571	G	0.1667	0.375	A	2	20483.6	9.53156e-09	-1.03249	2.60105	0.182089	-0.182499	0.0812612	0.789746	5	0.999902	0.881845	8.81845e-06	10.7464	8.28921e-08	0.000864313	A/G/R	-0.849993	1.21499	0	4	1	2	Intron (ENSSSCT00000004461.4/ENSSSCG00000004033.4, intron 2 of 7)	1	6798928	6883555	84628	1	ENSSSCT00000070003.1	62045	ENSSSCG00000004033	ENSSSCG00000004033
chr1:6861001	chr1	6861001	S1_6861001	T	G	T	G	0.71429	0.28571	0	2	0.28571	G	0.1667	0.375	T	2	20483.6	9.53156e-09	1.03249	2.60105	0.182089	-0.182499	0.0812612	0.789746	5	0.999902	0.881845	8.81845e-06	10.7464	8.28921e-08	0.000864313	G/T/K	1.21499	-0.849993	0	1	4	2	Intron (ENSSSCT00000004461.4/ENSSSCG00000004033.4, intron 2 of 7)	1	6798928	6883555	84628	1	ENSSSCT00000070003.1	62073	ENSSSCG00000004033	ENSSSCG00000004033
chr1:7119998	chr1	7119998	S1_7119998	C	T	C	T	0.75	0.25	0.14286	1	0.16667	T	0.3333	0.1667	C	2	0.956683	0.477104	0.843286	1.5398	0.302841	1.37627	0.83606	0.427949	4	0.000404714	1.25755	1.25755e-05	10.7261	0.781202	1	C/T/Y	-0.532984	-2.21956	0	4	1	1	Intron (ENSSSCT00000004467.4/ENSSSCG00000004039.4, intron 9 of 10)	1	7066240	7110555	44316	1	ENSSSCT00000088617.1	53758	ENSSSCG00000004038	ENSSSCG00000004038
chr1:7330502	chr1	7330502	S1_7330502	T	C	T	C	0.78571	0.21429	0	1	0.14286	C	0.1667	0.25	T	2	0.331601	0.735786	-0.268275	0.374606	0.573585	-0.569062	0.162233	0.707708	5	0.14222	0.991962	0.454952	13.3319	0.896851	1	C/T/Y	0.300788	0.837337	0	1	5	1	Distal Intergenic	1	7340442	7365505	25064	2	ENSSSCT00000086622.1	35003	ENSSSCG00000004041	ENSSSCG00000004041
chr1:7356999	chr1	7356999	S1_7356999	C	T	C	T	0.58333	0.41667	0.14286	1	0.16667	T	0.1667	0.6667	C	2	2.43134	0.235682	-0.807423	4.1512	0.134376	-0.88858	0.720283	0.458404	4	0.000642743	0.78584	7.8584e-06	9.70365	0.56156	1	C/T/Y	0.0811565	1.696	0	3	2	1	Intron (ENSSSCT00000004469.4/ENSSSCG00000004041.4, intron 4 of 11)	1	7340442	7365505	25064	2	ENSSSCT00000086622.1	8506	ENSSSCG00000004041	ENSSSCG00000004041
chr1:7399813	chr1	7399813	S1_7399813	C	T	C	T	0.78571	0.21429	0	1	0.14286	T	0.1667	0.25	C	2	0.331601	0.735786	0.268275	0.374606	0.573585	-0.569062	0.162233	0.707708	5	0.14222	0.991962	0.454952	13.3319	0.896851	1	C/T/Y	0.837337	0.300788	0	5	1	1	Intron (ENSSSCT00000067407.1/ENSSSCG00000004044.5, intron 29 of 47)	1	7340442	7365520	25079	2	ENSSSCT00000024677.3	-34293	ENSSSCG00000004041	ENSSSCG00000004041
chr1:7400387	chr1	7400387	S1_7400387	C	T	C	T	0.71429	0.28571	0	2	0.28571	T	0.3333	0.25	C	2	3.19811	0.148037	0.203482	0.155949	0.713067	1.23294	3.91699	0.118919	5	0.615245	0.659419	0.105894	10.49	0.468725	1	C/T/Y	-1.02946	-1.43642	0	4	1	2	Intron (ENSSSCT00000067407.1/ENSSSCG00000004044.5, intron 28 of 47)	1	7340442	7365520	25079	2	ENSSSCT00000024677.3	-34867	ENSSSCG00000004041	ENSSSCG00000004041
chr1:7410230	chr1	7410230	S1_7410230	G	A	G	A	0.78571	0.21429	0	1	0.14286	A	0.1667	0.25	G	2	0.331601	0.735786	-0.268275	0.374606	0.573585	-0.569062	0.162233	0.707708	5	0.14222	0.991962	0.454952	13.3319	0.896851	1	A/G/R	0.300788	0.837337	0	1	5	1	Intron (ENSSSCT00000067407.1/ENSSSCG00000004044.5, intron 19 of 47)	1	7340442	7365520	25079	2	ENSSSCT00000024677.3	-44710	ENSSSCG00000004041	ENSSSCG00000004041
chr1:7410233	chr1	7410233	S1_7410233	G	A	G	A	0.78571	0.21429	0	1	0.14286	A	0.1667	0.25	G	2	0.331601	0.735786	-0.268275	0.374606	0.573585	-0.569062	0.162233	0.707708	5	0.14222	0.991962	0.454952	13.3319	0.896851	1	A/G/R	0.300788	0.837337	0	1	5	1	Intron (ENSSSCT00000067407.1/ENSSSCG00000004044.5, intron 19 of 47)	1	7340442	7365520	25079	2	ENSSSCT00000024677.3	-44713	ENSSSCG00000004041	ENSSSCG00000004041
chr1:7410243	chr1	7410243	S1_7410243	C	T	C	T	0.78571	0.21429	0	1	0.14286	T	0.1667	0.25	C	2	0.331601	0.735786	0.268275	0.374606	0.573585	-0.569062	0.162233	0.707708	5	0.14222	0.991962	0.454952	13.3319	0.896851	1	C/T/Y	0.837337	0.300788	0	5	1	1	Intron (ENSSSCT00000067407.1/ENSSSCG00000004044.5, intron 19 of 47)	1	7340442	7365520	25079	2	ENSSSCT00000024677.3	-44723	ENSSSCG00000004041	ENSSSCG00000004041
chr1:7414007	chr1	7414007	S1_7414007	T	G	G	T	0.5	0.5	0	5	0.71429	T	0.5	0.5	G	2	16237.4	1.51677e-08	0.425	32474.2	5.68833e-09	-0.771662	0.646348	0.466482	5	0.999877	1.11242	1.11242e-05	12.9541	9.61171e-08	0.00137539	G/T/K	1.19666	0.346662	0	1	1	5	Intron (ENSSSCT00000067407.1/ENSSSCG00000004044.5, intron 16 of 47)	1	7368103	7458565	90463	2	ENSSSCT00000067407.1	44558	ENSSSCG00000004044	ENSSSCG00000004044
chr1:7505144	chr1	7505144	S1_7505144	C	T	C	T	0.58333	0.41667	0.14286	1	0.16667	T	0	0.625	C	2	21452.3	5.8463e-07	-0.373683	0.814831	0.433231	1.22368	8.73707	0.0597427	4	0.99993	0.842005	8.42005e-06	9.87879	2.86467e-06	0.0530137	C/T/Y	-1.59736	-0.849993	0	3	2	1	Distal Intergenic	1	7526653	7528823	2171	2	ENSSSCT00000004473.3	23679	ENSSSCG00000004045	ENSSSCG00000004045
chr1:7602633	chr1	7602633	S1_7602633	G	A	G	A	0.64286	0.35714	0	1	0.14286	A	0.3333	0.375	G	2	1.2261	0.38433	-0.255534	0.631522	0.471285	1.88401	1.98283	0.231862	5	0.380056	0.774211	0.289335	11.616	0.708059	1	A/G/R	-2.13954	-1.62847	0	2	4	1	Intron (ENSSSCT00000044125.2/ENSSSCG00000004049.4, intron 6 of 7)	1	7599025	7599157	133	1	ENSSSCT00000020200.2	3608	ENSSSCG00000018605	ENSSSCG00000018605
chr1:7659237	chr1	7659237	S1_7659237	C	T	C	T	0.5	0.5	0	3	0.42857	C	0.6667	0.375	T	2	2.82273	0.171978	-0.815001	3.44944	0.136833	-0.99333	2.19606	0.212494	5	0.585297	7.70234e-06	0.770234	10.3073	0.510969	1	C/T/Y	0.178329	1.80833	0	2	2	3	Intron (ENSSSCT00000039602.2/ENSSSCG00000040317.2, intron 1 of 3)	1	7622545	7651961	29417	2	ENSSSCT00000058364.2	-7276	ENSSSCG00000004050	ENSSSCG00000004050
chr1:7862051	chr1	7862051	S1_7862051	G	A	G	A	0.71429	0.28571	0	2	0.28571	A	0.5	0.125	G	2	16959.4	1.39038e-08	-0.52046	0.729297	0.441238	-0.329541	0.292371	0.617408	5	0.999882	1.06507	1.06507e-05	11.7887	9.56413e-08	0.00126079	A/G/R	-0.190918	0.850001	0	1	4	2	Distal Intergenic	1	7852739	7857230	4492	1	ENSSSCT00000070284.1	9312	ENSSSCG00000048737	ENSSSCG00000048737
chr1:7862052	chr1	7862052	S1_7862052	T	C	T	C	0.71429	0.28571	0	2	0.28571	C	0.5	0.125	T	2	16959.4	1.39038e-08	-0.52046	0.729297	0.441238	-0.329541	0.292371	0.617408	5	0.999882	1.06507	1.06507e-05	11.7887	9.56413e-08	0.00126079	C/T/Y	-0.190918	0.850001	0	1	4	2	Distal Intergenic	1	7852739	7857230	4492	1	ENSSSCT00000070284.1	9313	ENSSSCG00000048737	ENSSSCG00000048737
chr1:7862065	chr1	7862065	S1_7862065	G	T	G	T	0.64286	0.35714	0	3	0.42857	T	0.5	0.25	G	2	12394.1	2.60307e-08	0.580577	0.663244	0.461122	-0.269405	0.142808	0.724704	5	0.999839	1.45731	1.45731e-05	12.9252	1.3226e-07	0.00236044	G/T/K	0.849982	-0.311172	0	3	1	3	Distal Intergenic	1	7852739	7857230	4492	1	ENSSSCT00000070284.1	9326	ENSSSCG00000048737	ENSSSCG00000048737
chr1:7866145	chr1	7866145	S1_7866145	C	T	C	T	0.58333	0.41667	0.14286	1	0.16667	T	0.6667	0.1667	C	2	1.66142	0.326824	0.328536	0.486156	0.535823	2.1428	2.93569	0.185158	4	0.525524	0.572122	0.370365	8.80721	0.67735	1	C/T/Y	-1.81426	-2.47133	0	3	2	1	Distal Intergenic	1	7852739	7857230	4492	1	ENSSSCT00000070284.1	13406	ENSSSCG00000048737	ENSSSCG00000048737
chr1:7866147	chr1	7866147	S1_7866147	C	T	T	C	0.57143	0.42857	0	2	0.28571	C	0.3333	0.5	T	2	0.540569	0.619724	-0.0241627	0.00191665	0.967178	1.05582	1.07636	0.358112	5	0.212775	1.46213e-05	1.46213	12.8711	0.842568	1	C/T/Y	-1.07999	-1.03166	0	2	3	2	Distal Intergenic	1	7852739	7857230	4492	1	ENSSSCT00000070284.1	13408	ENSSSCG00000048737	ENSSSCG00000048737
chr1:7878875	chr1	7878875	S1_7878875	C	G	G	C	0.57143	0.42857	0	2	0.28571	C	0.5	0.375	G	2	0.03865	0.962442	-0.129061	0.0459418	0.840765	-0.141584	0.0181006	0.899475	5	0.0189586	0.516662	1.152	13.545	1	1	C/G/S	0.0125236	0.270645	0	2	3	2	Promoter (2-3kb)	1	7881148	7884836	3689	1	ENSSSCT00000080602.1	-2273	ENSSSCG00000043250	ENSSSCG00000043250
chr1:7879406	chr1	7879406	S1_7879406	G	T	G	T	0.64286	0.35714	0	3	0.42857	T	0.3333	0.375	G	2	0.717457	0.54167	-0.300002	0.19752	0.679717	-1.14333	1.43441	0.297163	5	0.264018	1.36695e-05	1.36695	12.6019	0.803241	1	G/T/K	0.843325	1.44333	0	3	1	3	Promoter (1-2kb)	1	7881148	7884836	3689	1	ENSSSCT00000080602.1	-1742	ENSSSCG00000043250	ENSSSCG00000043250
chr1:7879457	chr1	7879457	S1_7879457	C	G	C	G	0.57143	0.42857	0	2	0.28571	G	0.5	0.375	C	2	0.03865	0.962442	0.129061	0.0459418	0.840765	-0.141584	0.0181006	0.899475	5	0.0189586	0.516662	1.152	13.545	1	1	C/G/S	0.270645	0.0125236	0	3	2	2	Promoter (1-2kb)	1	7881148	7884836	3689	1	ENSSSCT00000080602.1	-1691	ENSSSCG00000043250	ENSSSCG00000043250
chr1:7879464	chr1	7879464	S1_7879464	C	T	C	T	0.64286	0.35714	0	3	0.42857	T	0.3333	0.375	C	2	0.717457	0.54167	-0.300002	0.19752	0.679717	-1.14333	1.43441	0.297163	5	0.264018	1.36695e-05	1.36695	12.6019	0.803241	1	C/T/Y	0.843325	1.44333	0	3	1	3	Promoter (1-2kb)	1	7881148	7884836	3689	1	ENSSSCT00000080602.1	-1684	ENSSSCG00000043250	ENSSSCG00000043250
chr1:7887902	chr1	7887902	S1_7887902	T	C	T	C	0.58333	0.41667	0.14286	1	0.16667	C	0.5	0.375	T	2	17444.1	7.97274e-07	-0.155619	0.102114	0.770268	1.00562	4.26381	0.13088	4	0.999914	1.03546	1.03546e-05	10.3811	3.85846e-06	0.072296	C/T/Y	-1.16124	-0.849998	0	2	3	1	Distal Intergenic	1	7881148	7884836	3689	1	ENSSSCT00000080602.1	6754	ENSSSCG00000043250	ENSSSCG00000043250
chr1:7887919	chr1	7887919	S1_7887919	T	C	T	C	0.58333	0.41667	0.14286	1	0.16667	C	0.5	0.375	T	2	17444.1	7.97274e-07	-0.155619	0.102114	0.770268	1.00562	4.26381	0.13088	4	0.999914	1.03546	1.03546e-05	10.3811	3.85846e-06	0.072296	C/T/Y	-1.16124	-0.849998	0	2	3	1	Distal Intergenic	1	7881148	7884836	3689	1	ENSSSCT00000080602.1	6771	ENSSSCG00000043250	ENSSSCG00000043250
chr1:7887937	chr1	7887937	S1_7887937	C	G	C	G	0.66667	0.33333	0.14286	2	0.33333	G	0.5	0.25	C	2	0.543557	0.628864	0.433334	0.448931	0.550805	0.99166	0.940414	0.403701	4	0.265986	1.25483e-05	1.25483	10.411	0.847979	1	C/G/S	-0.558325	-1.42499	0	3	1	2	Distal Intergenic	1	7881148	7884836	3689	1	ENSSSCT00000080602.1	6789	ENSSSCG00000043250	ENSSSCG00000043250
chr1:7892336	chr1	7892336	S1_7892336	G	A	G	A	0.71429	0.28571	0	2	0.28571	A	0.3333	0.25	G	2	0.617568	0.5838	-0.233751	0.123207	0.74329	1.19124	1.2307	0.329472	5	0.235932	1.41912e-05	1.41912	12.7517	0.823633	1	A/G/R	-1.42499	-0.95749	0	1	4	2	Distal Intergenic	1	7881148	7884836	3689	1	ENSSSCT00000080602.1	11188	ENSSSCG00000043250	ENSSSCG00000043250
chr1:7892369	chr1	7892369	S1_7892369	T	C	C	T	0.5	0.5	0	1	0.14286	C	0.5	0.5	T	2	4.07016	0.108557	-0.39224	7.39901	0.0529807	-1.22827	0.788864	0.424627	5	0.670519	1.31089	0.0435505	12.6297	0.367817	1	C/T/Y	0.836033	1.62051	0	3	3	1	Distal Intergenic	1	7881148	7884836	3689	1	ENSSSCT00000080602.1	11221	ENSSSCG00000043250	ENSSSCG00000043250
chr1:7895146	chr1	7895146	S1_7895146	G	C	G	C	0.71429	0.28571	0	2	0.28571	C	0.5	0.125	G	2	16959.4	1.39038e-08	-0.52046	0.729297	0.441238	-0.329541	0.292371	0.617408	5	0.999882	1.06507	1.06507e-05	11.7887	9.56413e-08	0.00126079	C/G/S	-0.190918	0.850001	0	1	4	2	Distal Intergenic	1	7881148	7884836	3689	1	ENSSSCT00000080602.1	13998	ENSSSCG00000043250	ENSSSCG00000043250
chr1:7896060	chr1	7896060	S1_7896060	T	C	T	C	0.71429	0.28571	0	2	0.28571	C	0.3333	0.25	T	2	0.617568	0.5838	-0.233751	0.123207	0.74329	1.19124	1.2307	0.329472	5	0.235932	1.41912e-05	1.41912	12.7517	0.823633	1	C/T/Y	-1.42499	-0.95749	0	1	4	2	Distal Intergenic	1	7881148	7884836	3689	1	ENSSSCT00000080602.1	14912	ENSSSCG00000043250	ENSSSCG00000043250
chr1:7896110	chr1	7896110	S1_7896110	T	C	T	C	0.71429	0.28571	0	2	0.28571	C	0.3333	0.25	T	2	0.617568	0.5838	-0.233751	0.123207	0.74329	1.19124	1.2307	0.329472	5	0.235932	1.41912e-05	1.41912	12.7517	0.823633	1	C/T/Y	-1.42499	-0.95749	0	1	4	2	Distal Intergenic	1	7881148	7884836	3689	1	ENSSSCT00000080602.1	14962	ENSSSCG00000043250	ENSSSCG00000043250
chr1:7908832	chr1	7908832	S1_7908832	T	C	T	C	0.64286	0.35714	0	3	0.42857	C	0.5	0.25	T	2	12394.1	2.60307e-08	-0.580577	0.663244	0.461122	-0.269405	0.142808	0.724704	5	0.999839	1.45731	1.45731e-05	12.9252	1.3226e-07	0.00236044	C/T/Y	-0.311172	0.849982	0	1	3	3	Distal Intergenic	1	7881148	7884836	3689	1	ENSSSCT00000080602.1	27684	ENSSSCG00000043250	ENSSSCG00000043250
chr1:7941819	chr1	7941819	S1_7941819	A	C	A	C	0.64286	0.35714	0	3	0.42857	C	0.5	0.25	A	2	12394.1	2.60307e-08	0.580577	0.663244	0.461122	-0.269405	0.142808	0.724704	5	0.999839	1.45731	1.45731e-05	12.9252	1.3226e-07	0.00236044	A/C/M	0.849982	-0.311172	0	3	1	3	Distal Intergenic	1	7881148	7884836	3689	1	ENSSSCT00000080602.1	60671	ENSSSCG00000043250	ENSSSCG00000043250
chr1:7941824	chr1	7941824	S1_7941824	A	G	A	G	0.64286	0.35714	0	3	0.42857	G	0.5	0.25	A	2	12394.1	2.60307e-08	0.580577	0.663244	0.461122	-0.269405	0.142808	0.724704	5	0.999839	1.45731	1.45731e-05	12.9252	1.3226e-07	0.00236044	A/G/R	0.849982	-0.311172	0	3	1	3	Distal Intergenic	1	7881148	7884836	3689	1	ENSSSCT00000080602.1	60676	ENSSSCG00000043250	ENSSSCG00000043250
chr1:7949140	chr1	7949140	S1_7949140	T	G	T	G	0.78571	0.21429	0	1	0.14286	G	0.3333	0.125	T	2	0.972611	0.452672	-0.245611	0.15851	0.710867	1.96194	1.94513	0.235578	5	0.327191	0.735771	0.389701	11.2456	0.769888	1	G/T/K	-2.20756	-1.71633	0	1	5	1	Distal Intergenic	1	7881148	7884836	3689	1	ENSSSCT00000080602.1	67992	ENSSSCG00000043250	ENSSSCG00000043250
chr1:8058976	chr1	8058976	S1_8058976	T	G	G	T	0.5	0.5	0.28571	1	0.2	T	0.6667	0.25	G	2	1.19596	0.455381	0.23815	0.166777	0.722565	2.07374	2.19316	0.27679	3	0.529656	1.01315	1.01315e-05	6.14715	0.770286	1	G/T/K	-1.83559	-2.31189	0	2	2	1	Intron (ENSSSCT00000004480.4/ENSSSCG00000004052.4, intron 2 of 24)	1	8007001	8081538	74538	2	ENSSSCT00000004480.4	22562	ENSSSCG00000004052	ENSSSCG00000004052
chr1:8117324	chr1	8117324	S1_8117324	G	C	G	C	0.75	0.25	0.14286	1	0.16667	C	0.1667	0.3333	G	2	1.50887	0.351991	0.859999	1.9203	0.259871	-1.79	1.98075	0.254028	4	0.501474	1.23245e-05	1.23245	10.3571	0.696766	1	C/G/S	2.65	0.930001	0	1	4	1	Distal Intergenic	1	8143696	8155866	12171	1	ENSSSCT00000075726.1	-26372	ENSSSCG00000045315	ENSSSCG00000045315
chr1:8117507	chr1	8117507	S1_8117507	C	A	C	A	0.625	0.375	0.42857	1	0.25	A	0.25	0.5	C	2	0.582916	0.679497	0.914646	0.731056	0.549655	-1.56714	0.671744	0.562911	2	0.522863	1.9794	1.9794e-05	Inf	0.867529	1	A/C/M	2.48179	0.652494	0	1	2	1	Distal Intergenic	1	8143696	8155866	12171	1	ENSSSCT00000075726.1	-26189	ENSSSCG00000045315	ENSSSCG00000045315
chr1:8117578	chr1	8117578	S1_8117578	T	C	T	C	0.625	0.375	0.42857	1	0.25	C	0.25	0.5	T	2	0.582916	0.679497	0.914646	0.731056	0.549655	-1.56714	0.671744	0.562911	2	0.522863	1.9794	1.9794e-05	Inf	0.867529	1	C/T/Y	2.48179	0.652494	0	1	2	1	Distal Intergenic	1	8143696	8155866	12171	1	ENSSSCT00000075726.1	-26118	ENSSSCG00000045315	ENSSSCG00000045315
chr1:8117650	chr1	8117650	S1_8117650	T	G	T	G	0.78571	0.21429	0	1	0.14286	G	0.1667	0.25	T	2	0.972611	0.452672	0.858167	1.57081	0.27835	-1.34939	1.06226	0.360938	5	0.327191	0.735771	0.389701	11.2456	0.769888	1	G/T/K	2.20756	0.491223	0	1	5	1	Distal Intergenic	1	8143696	8155866	12171	1	ENSSSCT00000075726.1	-26046	ENSSSCG00000045315	ENSSSCG00000045315
chr1:8304791	chr1	8304791	S1_8304791	G	A	G	A	0.78571	0.21429	0	1	0.14286	A	0.1667	0.25	G	2	1.39524	0.346993	0.821013	1.69198	0.263216	-1.77121	2.10294	0.220623	5	0.410939	0.590641	0.387225	10.7715	0.696766	1	A/G/R	2.59222	0.950195	0	1	5	1	Distal Intergenic	1	8331477	8333054	1578	2	ENSSSCT00000088574.1	28263	ENSSSCG00000051477	ENSSSCG00000051477
chr1:8304799	chr1	8304799	S1_8304799	A	G	A	G	0.64286	0.35714	0	3	0.42857	G	0.3333	0.375	A	2	0.717457	0.54167	-0.300002	0.19752	0.679717	-1.14333	1.43441	0.297163	5	0.264018	1.36695e-05	1.36695	12.6019	0.803241	1	A/G/R	0.843325	1.44333	0	3	1	3	Distal Intergenic	1	8331477	8333054	1578	2	ENSSSCT00000088574.1	28255	ENSSSCG00000051477	ENSSSCG00000051477
chr1:8304828	chr1	8304828	S1_8304828	A	G	A	G	0.64286	0.35714	0	3	0.42857	G	0.3333	0.375	A	2	0.717457	0.54167	-0.300002	0.19752	0.679717	-1.14333	1.43441	0.297163	5	0.264018	1.36695e-05	1.36695	12.6019	0.803241	1	A/G/R	0.843325	1.44333	0	3	1	3	Distal Intergenic	1	8331477	8333054	1578	2	ENSSSCT00000088574.1	28226	ENSSSCG00000051477	ENSSSCG00000051477
chr1:8327460	chr1	8327460	S1_8327460	A	G	A	G	0.58333	0.41667	0.14286	1	0.16667	G	0.5	0.375	A	2	17444.1	7.97274e-07	0.155619	0.102114	0.770268	1.00562	4.26381	0.13088	4	0.999914	1.03546	1.03546e-05	10.3811	3.85846e-06	0.072296	A/G/R	-0.849998	-1.16124	0	3	2	1	Distal Intergenic	1	8331477	8333054	1578	2	ENSSSCT00000088574.1	5594	ENSSSCG00000051477	ENSSSCG00000051477
chr1:8338000	chr1	8338000	S1_8338000	A	G	A	G	0.5	0.5	0.14286	2	0.33333	G	0.5	0.5	A	2	0.147259	0.868949	-0.274999	0.134371	0.73827	-0.519993	0.160147	0.715814	4	0.0893962	2.25119e-05	2.25119	12.1644	0.967815	1	A/G/R	0.244994	0.794993	0	2	2	2	Distal Intergenic	1	8331477	8333054	1578	2	ENSSSCT00000088574.1	-4946	ENSSSCG00000051477	ENSSSCG00000051477
chr1:8338218	chr1	8338218	S1_8338218	G	T	T	G	0.57143	0.42857	0	2	0.28571	G	0.3333	0.5	T	2	2.85219	0.169896	0.321665	0.648731	0.465719	1.58166	4.61326	0.0982184	5	0.587815	7.65558e-06	0.765558	10.283	0.510969	1	G/T/K	-1.26	-1.90333	0	2	3	2	Distal Intergenic	1	8331477	8333054	1578	2	ENSSSCT00000088574.1	-5164	ENSSSCG00000051477	ENSSSCG00000051477
chr1:8340626	chr1	8340626	S1_8340626	G	A	G	A	0.57143	0.42857	0	2	0.28571	A	0.5	0.375	G	2	0.03865	0.962442	-0.129061	0.0459418	0.840765	-0.141584	0.0181006	0.899475	5	0.0189586	0.516662	1.152	13.545	1	1	A/G/R	0.0125236	0.270645	0	2	3	2	Distal Intergenic	1	8331477	8333054	1578	2	ENSSSCT00000088574.1	-7572	ENSSSCG00000051477	ENSSSCG00000051477
chr1:8340647	chr1	8340647	S1_8340647	C	T	C	T	0.57143	0.42857	0	2	0.28571	T	0.5	0.375	C	2	0.03865	0.962442	0.129061	0.0459418	0.840765	-0.141584	0.0181006	0.899475	5	0.0189586	0.516662	1.152	13.545	1	1	C/T/Y	0.270645	0.0125236	0	3	2	2	Distal Intergenic	1	8331477	8333054	1578	2	ENSSSCT00000088574.1	-7593	ENSSSCG00000051477	ENSSSCG00000051477
chr1:8368262	chr1	8368262	S1_8368262	C	T	C	T	0.5	0.5	0.14286	4	0.66667	T	0.6667	0.3333	C	2	2.24717	0.253268	1.51213	4.4918	0.124255	-0.0940702	0.0121342	0.919242	4	0.599679	0.166533	0.76712	9.58525	0.578769	1	C/T/Y	1.6062	-1.41806	0	1	1	4	Distal Intergenic	1	8357112	8360010	2899	2	ENSSSCT00000071048.1	-8252	ENSSSCG00000044993	ENSSSCG00000044993
chr1:8478756	chr1	8478756	S1_8478756	G	A	A	G	0.5	0.5	0.14286	4	0.66667	A	0.5	0.5	G	2	1.66621	0.326083	0.3878	0.255092	0.64828	1.58973	3.08948	0.177047	4	0.000546914	0.975741	9.75741e-06	10.1613	0.676108	1	A/G/R	-1.20193	-1.97753	0	1	1	4	Intron (ENSSSCT00000004486.4/ENSSSCG00000004057.4, intron 10 of 16)	1	8453283	8546530	93248	2	ENSSSCT00000004486.4	67774	ENSSSCG00000004057	ENSSSCG00000004057
chr1:8600279	chr1	8600279	S1_8600279	A	C	A	C	0.58333	0.41667	0.14286	3	0.5	C	0.5	0.3333	A	2	0.856528	0.507841	0.871422	1.17027	0.358545	0.922034	0.880103	0.417381	4	0.000377745	1.311	1.311e-05	11.0111	0.781202	1	A/C/M	-0.0506121	-1.79346	0	2	1	3	Promoter (1-2kb)	1	8565015	8599065	34051	2	ENSSSCT00000087583.1	-1214	ENSSSCG00000024876	ENSSSCG00000024876
chr1:8610746	chr1	8610746	S1_8610746	C	T	T	C	0.57143	0.42857	0	2	0.28571	C	0.6667	0.25	T	2	36311.9	3.0333e-09	-0.621041	3.81556	0.122486	1.47104	21.4062	0.00983162	5	0.999945	0.497471	4.97471e-06	8.87835	3.98046e-08	0.000275057	C/T/Y	-2.09208	-0.849996	0	2	3	2	Intron (ENSSSCT00000082395.1/ENSSSCG00000024876.3, intron 1 of 17)	1	8565015	8599065	34051	2	ENSSSCT00000087583.1	-11681	ENSSSCG00000024876	ENSSSCG00000024876
chr1:8610875	chr1	8610875	S1_8610875	T	G	T	G	0.71429	0.28571	0	2	0.28571	G	0.3333	0.25	T	2	21924	8.32037e-09	-0.458505	0.718963	0.444242	1.30851	5.85539	0.0727795	5	0.999909	0.823913	8.23913e-06	10.7443	7.56493e-08	0.000754483	G/T/K	-1.76701	-0.850005	0	1	4	2	Intron (ENSSSCT00000082395.1/ENSSSCG00000024876.3, intron 1 of 17)	1	8565015	8599065	34051	2	ENSSSCT00000087583.1	-11810	ENSSSCG00000024876	ENSSSCG00000024876
chr1:8855688	chr1	8855688	S1_8855688	T	C	T	C	0.78571	0.21429	0	1	0.14286	C	0.1667	0.25	T	2	0.972611	0.452672	0.858167	1.57081	0.27835	-1.34939	1.06226	0.360938	5	0.327191	0.735771	0.389701	11.2456	0.769888	1	C/T/Y	2.20756	0.491223	0	1	5	1	Intron (ENSSSCT00000077640.1/ENSSSCG00000043930.1, intron 1 of 1)	1	8655544	8824497	168954	2	ENSSSCT00000050178.2	-31191	ENSSSCG00000031776	ENSSSCG00000031776
chr1:9061035	chr1	9061035	S1_9061035	A	G	A	G	0.78571	0.21429	0	1	0.14286	G	0.5	0	A	2	0.696787	0.550005	0.686748	1.06655	0.360075	-0.304638	0.0497991	0.834346	5	0.258377	0.90728	0.358417	11.758	0.804068	1	A/G/R	0.991387	-0.38211	0	5	1	1	Intron (ENSSSCT00000025405.3/ENSSSCG00000012315.4, intron 4 of 27)	1	9014551	9108983	94433	2	ENSSSCT00000025405.3	47948	ENSSSCG00000012315	ENSSSCG00000012315
chr1:9112506	chr1	9112506	S1_9112506	A	G	A	G	0.66667	0.33333	0.14286	2	0.33333	G	0.3333	0.3333	A	2	1.82316	0.303256	-0.766665	1.58017	0.297698	-1.69833	3.10169	0.176429	4	0.548622	1.11589e-05	1.11589	10.059	0.639943	1	A/G/R	0.931668	2.465	0	3	1	2	Distal Intergenic	1	9109389	9110593	1205	1	ENSSSCT00000079423.1	3117	ENSSSCG00000043711	ENSSSCG00000043711
chr1:9112507	chr1	9112507	S1_9112507	A	T	A	T	0.66667	0.33333	0.14286	2	0.33333	T	0.3333	0.3333	A	2	1.82316	0.303256	-0.766665	1.58017	0.297698	-1.69833	3.10169	0.176429	4	0.548622	1.11589e-05	1.11589	10.059	0.639943	1	A/T/W	0.931668	2.465	0	3	1	2	Distal Intergenic	1	9109389	9110593	1205	1	ENSSSCT00000079423.1	3118	ENSSSCG00000043711	ENSSSCG00000043711
chr1:9148674	chr1	9148674	S1_9148674	T	C	C	T	0.5	0.5	0	3	0.42857	C	0.5	0.5	T	2	0.460766	0.660571	0.0371643	0.0034905	0.955722	-0.611919	0.681537	0.455449	5	0.187245	1.29942	0.249154	13.2869	0.867529	1	C/T/Y	0.649083	0.574755	0	2	2	3	Intron (ENSSSCT00000082582.1/ENSSSCG00000030535.3, intron 11 of 16)	1	9109389	9110593	1205	1	ENSSSCT00000079423.1	39285	ENSSSCG00000043711	ENSSSCG00000043711
chr1:9148714	chr1	9148714	S1_9148714	C	T	C	T	0.5	0.5	0	3	0.42857	C	0.5	0.5	T	2	0.460766	0.660571	-0.0371643	0.0034905	0.955722	-0.611919	0.681537	0.455449	5	0.187245	1.29942	0.249154	13.2869	0.867529	1	C/T/Y	0.574755	0.649083	0	2	2	3	Intron (ENSSSCT00000082582.1/ENSSSCG00000030535.3, intron 11 of 16)	1	9109389	9110593	1205	1	ENSSSCT00000079423.1	39325	ENSSSCG00000043711	ENSSSCG00000043711
chr1:9148732	chr1	9148732	S1_9148732	G	C	C	G	0.5	0.5	0	3	0.42857	G	0.5	0.5	C	2	0.460766	0.660571	0.0371643	0.0034905	0.955722	-0.611919	0.681537	0.455449	5	0.187245	1.29942	0.249154	13.2869	0.867529	1	C/G/S	0.649083	0.574755	0	2	2	3	Intron (ENSSSCT00000082582.1/ENSSSCG00000030535.3, intron 11 of 16)	1	9109389	9110593	1205	1	ENSSSCT00000079423.1	39343	ENSSSCG00000043711	ENSSSCG00000043711
chr1:9148753	chr1	9148753	S1_9148753	G	T	G	T	0.5	0.5	0	3	0.42857	G	0.5	0.5	T	2	0.460766	0.660571	-0.0371643	0.0034905	0.955722	-0.611919	0.681537	0.455449	5	0.187245	1.29942	0.249154	13.2869	0.867529	1	G/T/K	0.574755	0.649083	0	2	2	3	Intron (ENSSSCT00000082582.1/ENSSSCG00000030535.3, intron 11 of 16)	1	9109389	9110593	1205	1	ENSSSCT00000079423.1	39364	ENSSSCG00000043711	ENSSSCG00000043711
chr1:9148754	chr1	9148754	S1_9148754	A	C	A	C	0.5	0.5	0	3	0.42857	A	0.5	0.5	C	2	0.460766	0.660571	-0.0371643	0.0034905	0.955722	-0.611919	0.681537	0.455449	5	0.187245	1.29942	0.249154	13.2869	0.867529	1	A/C/M	0.574755	0.649083	0	2	2	3	Intron (ENSSSCT00000082582.1/ENSSSCG00000030535.3, intron 11 of 16)	1	9109389	9110593	1205	1	ENSSSCT00000079423.1	39365	ENSSSCG00000043711	ENSSSCG00000043711
chr1:9148759	chr1	9148759	S1_9148759	A	G	A	G	0.5	0.5	0	3	0.42857	A	0.5	0.5	G	2	0.460766	0.660571	-0.0371643	0.0034905	0.955722	-0.611919	0.681537	0.455449	5	0.187245	1.29942	0.249154	13.2869	0.867529	1	A/G/R	0.574755	0.649083	0	2	2	3	Intron (ENSSSCT00000082582.1/ENSSSCG00000030535.3, intron 11 of 16)	1	9109389	9110593	1205	1	ENSSSCT00000079423.1	39370	ENSSSCG00000043711	ENSSSCG00000043711
chr1:9208552	chr1	9208552	S1_9208552	G	C	G	C	0.78571	0.21429	0	1	0.14286	C	0.1667	0.25	G	2	0.331601	0.735786	-0.268275	0.374606	0.573585	-0.569062	0.162233	0.707708	5	0.14222	0.991962	0.454952	13.3319	0.896851	1	C/G/S	0.300788	0.837337	0	1	5	1	Intron (ENSSSCT00000071164.1/ENSSSCG00000030535.3, intron 2 of 19)	1	9130334	9194439	64106	2	ENSSSCT00000053140.2	-14113	ENSSSCG00000030535	ENSSSCG00000030535
chr1:9405768	chr1	9405768	S1_9405768	G	A	G	A	0.57143	0.42857	0	2	0.28571	A	0.3333	0.5	G	2	57560.2	1.20722e-09	0.425002	115110	4.5279e-10	-1.69561	11.2713	0.0283764	5	0.999965	0.313836	3.13836e-06	7.03568	1.69117e-08	0.000109469	A/G/R	2.12061	1.2706	0	2	3	2	Intron (ENSSSCT00000045836.2/ENSSSCG00000035027.2, intron 3 of 8)	1	9323123	9329581	6459	1	ENSSSCT00000073586.1	82645	ENSSSCG00000045936	ENSSSCG00000045936
chr1:9405773	chr1	9405773	S1_9405773	T	G	T	G	0.57143	0.42857	0	2	0.28571	G	0.3333	0.5	T	2	57560.2	1.20722e-09	0.425002	115110	4.5279e-10	-1.69561	11.2713	0.0283764	5	0.999965	0.313836	3.13836e-06	7.03568	1.69117e-08	0.000109469	G/T/K	2.12061	1.2706	0	2	3	2	Intron (ENSSSCT00000045836.2/ENSSSCG00000035027.2, intron 3 of 8)	1	9323123	9329581	6459	1	ENSSSCT00000073586.1	82650	ENSSSCG00000045936	ENSSSCG00000045936
chr1:9405789	chr1	9405789	S1_9405789	G	A	G	A	0.57143	0.42857	0	2	0.28571	A	0.3333	0.5	G	2	57560.2	1.20722e-09	0.425002	115110	4.5279e-10	-1.69561	11.2713	0.0283764	5	0.999965	0.313836	3.13836e-06	7.03568	1.69117e-08	0.000109469	A/G/R	2.12061	1.2706	0	2	3	2	Intron (ENSSSCT00000045836.2/ENSSSCG00000035027.2, intron 3 of 8)	1	9323123	9329581	6459	1	ENSSSCT00000073586.1	82666	ENSSSCG00000045936	ENSSSCG00000045936
chr1:9542943	chr1	9542943	S1_9542943	A	G	A	G	0.5	0.5	0	3	0.42857	G	0.5	0.5	A	2	12881.7	2.40977e-08	-0.424995	25763.4	9.03719e-09	0.327023	0.0939155	0.774547	5	0.999845	1.40216	1.40216e-05	13.0241	1.28652e-07	0.00218516	A/G/R	-0.752017	0.0979722	0	2	2	3	Intron (ENSSSCT00000045836.2/ENSSSCG00000035027.2, intron 1 of 8)	1	9350294	9619727	269434	2	ENSSSCT00000045836.2	76784	ENSSSCG00000035027	ENSSSCG00000035027
chr1:9583893	chr1	9583893	S1_9583893	A	C	A	C	0.78571	0.21429	0	1	0.14286	C	0	0.375	A	2	2.34076	0.21229	-1.05186	3.73882	0.125295	0.35206	0.10417	0.763049	5	0.539251	0.351733	0.414167	9.90917	0.526111	1	A/C/M	-1.40392	0.699803	0	5	1	1	Intron (ENSSSCT00000045836.2/ENSSSCG00000035027.2, intron 1 of 8)	1	9350294	9619727	269434	2	ENSSSCT00000045836.2	35834	ENSSSCG00000035027	ENSSSCG00000035027
chr1:9583951	chr1	9583951	S1_9583951	C	T	C	T	0.78571	0.21429	0	1	0.14286	T	0	0.375	C	2	2.34076	0.21229	-1.05186	3.73882	0.125295	0.35206	0.10417	0.763049	5	0.539251	0.351733	0.414167	9.90917	0.526111	1	C/T/Y	-1.40392	0.699803	0	5	1	1	Intron (ENSSSCT00000045836.2/ENSSSCG00000035027.2, intron 1 of 8)	1	9350294	9619727	269434	2	ENSSSCT00000045836.2	35776	ENSSSCG00000035027	ENSSSCG00000035027
chr1:9583965	chr1	9583965	S1_9583965	C	T	C	T	0.78571	0.21429	0	1	0.14286	T	0	0.375	C	2	2.34076	0.21229	-1.05186	3.73882	0.125295	0.35206	0.10417	0.763049	5	0.539251	0.351733	0.414167	9.90917	0.526111	1	C/T/Y	-1.40392	0.699803	0	5	1	1	Intron (ENSSSCT00000045836.2/ENSSSCG00000035027.2, intron 1 of 8)	1	9350294	9619727	269434	2	ENSSSCT00000045836.2	35762	ENSSSCG00000035027	ENSSSCG00000035027
chr1:9596340	chr1	9596340	S1_9596340	A	G	A	G	0.78571	0.21429	0	1	0.14286	G	0	0.375	A	2	2.34076	0.21229	-1.05186	3.73882	0.125295	0.35206	0.10417	0.763049	5	0.539251	0.351733	0.414167	9.90917	0.526111	1	A/G/R	-1.40392	0.699803	0	5	1	1	Intron (ENSSSCT00000045836.2/ENSSSCG00000035027.2, intron 1 of 8)	1	9350294	9619727	269434	2	ENSSSCT00000045836.2	23387	ENSSSCG00000035027	ENSSSCG00000035027
chr1:9596393	chr1	9596393	S1_9596393	G	A	G	A	0.78571	0.21429	0	1	0.14286	A	0	0.375	G	2	2.34076	0.21229	1.05186	3.73882	0.125295	0.35206	0.10417	0.763049	5	0.539251	0.351733	0.414167	9.90917	0.526111	1	A/G/R	0.699803	-1.40392	0	1	5	1	Intron (ENSSSCT00000045836.2/ENSSSCG00000035027.2, intron 1 of 8)	1	9350294	9619727	269434	2	ENSSSCT00000045836.2	23334	ENSSSCG00000035027	ENSSSCG00000035027
chr1:9596444	chr1	9596444	S1_9596444	A	C	A	C	0.78571	0.21429	0	1	0.14286	C	0	0.375	A	2	2.34076	0.21229	-1.05186	3.73882	0.125295	0.35206	0.10417	0.763049	5	0.539251	0.351733	0.414167	9.90917	0.526111	1	A/C/M	-1.40392	0.699803	0	5	1	1	Intron (ENSSSCT00000045836.2/ENSSSCG00000035027.2, intron 1 of 8)	1	9350294	9619727	269434	2	ENSSSCT00000045836.2	23283	ENSSSCG00000035027	ENSSSCG00000035027
chr1:9596461	chr1	9596461	S1_9596461	T	C	T	C	0.78571	0.21429	0	1	0.14286	C	0	0.375	T	2	2.34076	0.21229	1.05186	3.73882	0.125295	0.35206	0.10417	0.763049	5	0.539251	0.351733	0.414167	9.90917	0.526111	1	C/T/Y	0.699803	-1.40392	0	1	5	1	Intron (ENSSSCT00000045836.2/ENSSSCG00000035027.2, intron 1 of 8)	1	9350294	9619727	269434	2	ENSSSCT00000045836.2	23266	ENSSSCG00000035027	ENSSSCG00000035027
chr1:9732168	chr1	9732168	S1_9732168	T	C	T	C	0.64286	0.35714	0	1	0.14286	C	0.3333	0.375	T	2	17004.2	1.38308e-08	-0.424999	34007.8	5.18692e-09	1.13406	0.721343	0.443547	5	0.999882	1.06227	1.06227e-05	11.5932	9.56413e-08	0.00125416	C/T/Y	-1.55906	-0.709062	0	2	4	1	Distal Intergenic	1	9747237	9749081	1845	2	ENSSSCT00000090180.1	16913	ENSSSCG00000050351	ENSSSCG00000050351
chr1:9906693	chr1	9906693	S1_9906693	C	T	C	T	0.64286	0.35714	0	3	0.42857	T	0.5	0.25	C	2	0.141734	0.872025	0.432231	0.283168	0.622816	0.198688	0.0296313	0.871688	5	0.066177	1.29001	0.366148	12.5355	0.969339	1	C/T/Y	0.233543	-0.630918	0	3	1	3	Intron (ENSSSCT00000004493.4/ENSSSCG00000004064.4, intron 6 of 20)	1	9791632	9893526	101895	2	ENSSSCT00000053144.2	-13167	ENSSSCG00000004064	ENSSSCG00000004064
chr1:9906716	chr1	9906716	S1_9906716	A	T	A	T	0.57143	0.42857	0	4	0.57143	T	0.5	0.375	A	2	0.286513	0.76509	0.140076	0.0284665	0.874205	0.81689	0.572875	0.491254	5	0.125306	1.19169	0.351312	12.295	0.911583	1	A/T/W	-0.676814	-0.956966	0	2	1	4	Intron (ENSSSCT00000004493.4/ENSSSCG00000004064.4, intron 6 of 20)	1	9791632	9893526	101895	2	ENSSSCT00000053144.2	-13190	ENSSSCG00000004064	ENSSSCG00000004064
chr1:9906724	chr1	9906724	S1_9906724	A	C	A	C	0.57143	0.42857	0	4	0.57143	C	0.5	0.375	A	2	0.286513	0.76509	0.140076	0.0284665	0.874205	0.81689	0.572875	0.491254	5	0.125306	1.19169	0.351312	12.295	0.911583	1	A/C/M	-0.676814	-0.956966	0	2	1	4	Intron (ENSSSCT00000004493.4/ENSSSCG00000004064.4, intron 6 of 20)	1	9791632	9893526	101895	2	ENSSSCT00000053144.2	-13198	ENSSSCG00000004064	ENSSSCG00000004064
chr1:9906771	chr1	9906771	S1_9906771	A	G	A	G	0.57143	0.42857	0	4	0.57143	G	0.5	0.375	A	2	0.286513	0.76509	0.140076	0.0284665	0.874205	0.81689	0.572875	0.491254	5	0.125306	1.19169	0.351312	12.295	0.911583	1	A/G/R	-0.676814	-0.956966	0	2	1	4	Intron (ENSSSCT00000004493.4/ENSSSCG00000004064.4, intron 6 of 20)	1	9791632	9893526	101895	2	ENSSSCT00000053144.2	-13245	ENSSSCG00000004064	ENSSSCG00000004064
chr1:10133630	chr1	10133630	S1_10133630	T	C	T	C	0.71429	0.28571	0	2	0.28571	C	0.5	0.125	T	2	0.360519	0.717869	-0.618212	0.715979	0.445117	0.464261	0.144697	0.722993	5	0.152729	1.12341	0.356708	12.2005	0.882006	1	C/T/Y	-1.08247	0.153951	0	1	4	2	Intron (ENSSSCT00000004493.4/ENSSSCG00000004064.4, intron 2 of 20)	1	9792628	10176633	384006	2	ENSSSCT00000043067.2	43003	ENSSSCG00000004064	ENSSSCG00000004064
chr1:10133656	chr1	10133656	S1_10133656	G	A	G	A	0.71429	0.28571	0	2	0.28571	A	0.1667	0.375	G	2	1.13455	0.407107	0.93029	2.21401	0.210982	-0.860036	0.820608	0.416235	5	0.36195	0.321778	0.766658	11.732	0.736909	1	A/G/R	1.79033	-0.0702542	0	1	4	2	Intron (ENSSSCT00000004493.4/ENSSSCG00000004064.4, intron 2 of 20)	1	9792628	10176633	384006	2	ENSSSCT00000043067.2	42977	ENSSSCG00000004064	ENSSSCG00000004064
chr1:10362139	chr1	10362139	S1_10362139	G	T	G	T	0.5	0.5	0.14286	2	0.33333	T	0.6667	0.3333	G	2	1.51974	0.350092	0.38793	0.455619	0.548045	1.33273	2.55882	0.207984	4	0.000523034	1.02307	1.02307e-05	10.4486	0.696766	1	G/T/K	-0.944795	-1.72066	0	2	2	2	Distal Intergenic	1	10296925	10298030	1106	1	ENSSSCT00000067470.1	65214	ENSSSCG00000045120	ENSSSCG00000045120
chr1:11083620	chr1	11083620	S1_11083620	G	T	G	T	0.71429	0.28571	0	2	0.28571	T	0	0.5	G	2	13.927	0.0157687	-1.20625	19.9634	0.0110914	0.411248	0.892473	0.3983	5	0.874427	2.33229e-06	0.233229	5.52862	0.0687313	1	G/T/K	-1.6175	0.795002	0	4	1	2	Distal Intergenic	1	11004866	11008747	3882	1	ENSSSCT00000085945.1	78754	ENSSSCG00000051255	ENSSSCG00000051255
chr1:11471739	chr1	11471739	S1_11471739	C	T	C	T	0.71429	0.28571	0	2	0.28571	T	0	0.5	C	2	13.927	0.0157687	-1.20625	19.9634	0.0110914	0.411248	0.892473	0.3983	5	0.874427	2.33229e-06	0.233229	5.52862	0.0687313	1	C/T/Y	-1.6175	0.795002	0	4	1	2	Intron (ENSSSCT00000004497.3/ENSSSCG00000004068.3, intron 9 of 12)	1	11446060	11500978	54919	1	ENSSSCT00000004497.3	25679	ENSSSCG00000004068	ENSSSCG00000004068
chr1:11471991	chr1	11471991	S1_11471991	C	T	C	T	0.78571	0.21429	0	1	0.14286	T	0.5	0	C	2	0.696787	0.550005	0.686748	1.06655	0.360075	-0.304638	0.0497991	0.834346	5	0.258377	0.90728	0.358417	11.758	0.804068	1	C/T/Y	0.991387	-0.38211	0	5	1	1	Intron (ENSSSCT00000004497.3/ENSSSCG00000004068.3, intron 9 of 12)	1	11446060	11500978	54919	1	ENSSSCT00000004497.3	25931	ENSSSCG00000004068	ENSSSCG00000004068
chr1:11565852	chr1	11565852	S1_11565852	G	C	G	C	0.78571	0.21429	0	1	0.14286	C	0.5	0	G	2	0.696787	0.550005	-0.686748	1.06655	0.360075	-0.304638	0.0497991	0.834346	5	0.258377	0.90728	0.358417	11.758	0.804068	1	C/G/S	-0.38211	0.991387	0	1	5	1	Promoter (<=1kb)	1	11566249	11653881	87633	1	ENSSSCT00000031943.3	-397	ENSSSCG00000024361	ENSSSCG00000024361
chr1:11565913	chr1	11565913	S1_11565913	T	C	T	C	0.78571	0.21429	0	1	0.14286	C	0.5	0	T	2	0.696787	0.550005	-0.686748	1.06655	0.360075	-0.304638	0.0497991	0.834346	5	0.258377	0.90728	0.358417	11.758	0.804068	1	C/T/Y	-0.38211	0.991387	0	1	5	1	Promoter (<=1kb)	1	11566249	11653881	87633	1	ENSSSCT00000031943.3	-336	ENSSSCG00000024361	ENSSSCG00000024361
chr1:11565920	chr1	11565920	S1_11565920	T	A	T	A	0.78571	0.21429	0	1	0.14286	A	0.5	0	T	2	0.696787	0.550005	-0.686748	1.06655	0.360075	-0.304638	0.0497991	0.834346	5	0.258377	0.90728	0.358417	11.758	0.804068	1	A/T/W	-0.38211	0.991387	0	1	5	1	Promoter (<=1kb)	1	11566249	11653881	87633	1	ENSSSCT00000031943.3	-329	ENSSSCG00000024361	ENSSSCG00000024361
chr1:11566039	chr1	11566039	S1_11566039	G	T	G	T	0.78571	0.21429	0	1	0.14286	T	0.5	0	G	2	0.696787	0.550005	0.686748	1.06655	0.360075	-0.304638	0.0497991	0.834346	5	0.258377	0.90728	0.358417	11.758	0.804068	1	G/T/K	0.991387	-0.38211	0	5	1	1	Promoter (<=1kb)	1	11566249	11653881	87633	1	ENSSSCT00000031943.3	-210	ENSSSCG00000024361	ENSSSCG00000024361
chr1:11574622	chr1	11574622	S1_11574622	G	T	G	T	0.71429	0.28571	0	2	0.28571	T	0.5	0.125	G	2	0.360519	0.717869	0.618212	0.715979	0.445117	0.464261	0.144697	0.722993	5	0.152729	1.12341	0.356708	12.2005	0.882006	1	G/T/K	0.153951	-1.08247	0	4	1	2	Intron (ENSSSCT00000031943.3/ENSSSCG00000024361.3, intron 2 of 7)	1	11566249	11653881	87633	1	ENSSSCT00000031943.3	8373	ENSSSCG00000024361	ENSSSCG00000024361
chr1:11596390	chr1	11596390	S1_11596390	G	T	G	T	0.5	0.5	0.28571	1	0.2	T	0.25	0.6667	G	2	1.55063	0.392059	-0.59463	1.79425	0.312332	-1.08538	1.05858	0.411695	3	0.579869	0.771489	7.71489e-06	5.64032	0.719332	1	G/T/K	0.490754	1.68001	0	2	2	1	Intron (ENSSSCT00000031943.3/ENSSSCG00000024361.3, intron 5 of 7)	1	11566249	11653881	87633	1	ENSSSCT00000031943.3	30141	ENSSSCG00000024361	ENSSSCG00000024361
chr1:11601894	chr1	11601894	S1_11601894	C	G	C	G	0.75	0.25	0.14286	1	0.16667	G	0.75	0	C	2	3.32281	0.173455	0.890364	4.84658	0.115011	-0.534221	0.419435	0.563364	4	0.68896	0.146471	0.344451	7.50966	0.510969	1	C/G/S	1.42458	-0.356143	0	4	1	1	Intron (ENSSSCT00000031943.3/ENSSSCG00000024361.3, intron 5 of 7)	1	11566249	11653881	87633	1	ENSSSCT00000031943.3	35645	ENSSSCG00000024361	ENSSSCG00000024361
chr1:11667445	chr1	11667445	S1_11667445	A	G	A	G	0.6	0.4	0.28571	2	0.4	G	0.25	0.5	A	2	0.289789	0.77532	-0.516829	0.577883	0.526534	-0.064651	0.00276581	0.962838	3	0.214305	1.52566	1.52566e-05	7.20267	0.919777	1	A/G/R	-0.452178	0.58148	0	2	1	2	Intron (ENSSSCT00000004494.4/ENSSSCG00000004065.4, intron 16 of 26)	1	11648508	11759349	110842	2	ENSSSCT00000027128.3	91904	ENSSSCG00000004065	ENSSSCG00000004065
chr1:11675721	chr1	11675721	S1_11675721	G	A	A	G	0.5	0.5	0	3	0.42857	G	0.5	0.5	A	2	17159.9	1.3581e-08	0.154777	0.10537	0.761745	0.69523	2.12592	0.218572	5	0.999883	1.05263	1.05263e-05	11.8154	9.56413e-08	0.00123151	A/G/R	-0.540453	-0.850006	0	2	2	3	Intron (ENSSSCT00000004494.4/ENSSSCG00000004065.4, intron 15 of 26)	1	11648508	11759349	110842	2	ENSSSCT00000027128.3	83628	ENSSSCG00000004065	ENSSSCG00000004065
chr1:11750407	chr1	11750407	S1_11750407	C	T	C	T	0.5	0.5	0.28571	1	0.2	C	0.25	0.6667	T	2	1.55063	0.392059	0.59463	1.79425	0.312332	-1.08538	1.05858	0.411695	3	0.579869	0.771489	7.71489e-06	5.64032	0.719332	1	C/T/Y	1.68001	0.490754	0	2	2	1	Intron (ENSSSCT00000004494.4/ENSSSCG00000004065.4, intron 6 of 26)	1	11648508	11759349	110842	2	ENSSSCT00000027128.3	8942	ENSSSCG00000004065	ENSSSCG00000004065
chr1:11750408	chr1	11750408	S1_11750408	T	C	T	C	0.58333	0.41667	0.14286	3	0.5	C	0.25	0.5	T	2	16373.6	8.76718e-07	-0.0463064	0.00848665	0.932407	0.803689	2.55635	0.208149	4	0.999908	1.10315	1.10315e-05	10.5711	4.22243e-06	0.0794999	C/T/Y	-0.849996	-0.757383	0	1	2	3	Intron (ENSSSCT00000004494.4/ENSSSCG00000004065.4, intron 6 of 26)	1	11648508	11759349	110842	2	ENSSSCT00000027128.3	8941	ENSSSCG00000004065	ENSSSCG00000004065
chr1:11777720	chr1	11777720	S1_11777720	C	T	C	T	0.5	0.5	0	3	0.42857	C	0.5	0.5	T	2	15024.2	1.77157e-08	0.0141258	0.000698494	0.980181	0.864122	2.61378	0.181245	5	0.999867	1.20224	1.20224e-05	12.2515	1.02009e-07	0.00160645	C/T/Y	-0.849996	-0.878248	0	2	2	3	Intron (ENSSSCT00000004494.4/ENSSSCG00000004065.4, intron 1 of 26)	1	11648508	11759349	110842	2	ENSSSCT00000027128.3	-18371	ENSSSCG00000004065	ENSSSCG00000004065
chr1:11847805	chr1	11847805	S1_11847805	T	C	T	C	0.64286	0.35714	0	3	0.42857	C	0.1667	0.5	T	2	17376.1	1.3245e-08	0.168821	0.157109	0.712068	1.01882	5.7217	0.0750041	5	0.999885	1.03953	1.03953e-05	12.2662	9.49144e-08	0.00120105	C/T/Y	-0.849995	-1.18764	0	1	3	3	Intron (ENSSSCT00000062929.2/ENSSSCG00000004070.4, intron 23 of 24)	1	11648508	11799068	150561	2	ENSSSCT00000023199.3	-48737	ENSSSCG00000004065	ENSSSCG00000004065
chr1:11847821	chr1	11847821	S1_11847821	G	A	G	A	0.71429	0.28571	0	2	0.28571	A	0.1667	0.375	G	2	12646.3	2.50033e-08	-0.138155	0.0756452	0.79691	0.711836	2.00812	0.22942	5	0.999842	1.42826	1.42826e-05	13.6425	1.30626e-07	0.00226727	A/G/R	-0.849991	-0.573681	0	1	4	2	Intron (ENSSSCT00000062929.2/ENSSSCG00000004070.4, intron 23 of 24)	1	11648508	11799068	150561	2	ENSSSCT00000023199.3	-48753	ENSSSCG00000004065	ENSSSCG00000004065
chr1:11864589	chr1	11864589	S1_11864589	G	C	G	C	0.57143	0.42857	0	4	0.57143	C	0.3333	0.5	G	2	0.203659	0.823704	-0.122608	0.0342889	0.862104	0.418395	0.294129	0.616388	5	0.0924186	1.10339	0.443256	13.6161	0.940714	1	C/G/S	-0.541003	-0.295786	0	1	2	4	Intron (ENSSSCT00000062929.2/ENSSSCG00000004070.4, intron 23 of 24)	1	11648508	11799068	150561	2	ENSSSCT00000023199.3	-65521	ENSSSCG00000004065	ENSSSCG00000004065
chr1:11926183	chr1	11926183	S1_11926183	T	G	T	G	0.57143	0.42857	0	4	0.57143	G	0.6667	0.25	T	2	2.6974	0.181278	-1.1697	4.37466	0.104645	-0.425592	0.361435	0.580119	5	0.574233	0.309701	0.399733	9.73373	0.510969	1	G/T/K	-0.744105	1.59529	0	1	2	4	Intron (ENSSSCT00000062929.2/ENSSSCG00000004070.4, intron 22 of 24)	1	11648508	11799068	150561	2	ENSSSCT00000023199.3	-127115	ENSSSCG00000004065	ENSSSCG00000004065
chr1:11938150	chr1	11938150	S1_11938150	C	T	C	T	0.66667	0.33333	0.14286	2	0.33333	T	0.3333	0.3333	C	2	1.82316	0.303256	-0.766665	1.58017	0.297698	-1.69833	3.10169	0.176429	4	0.548622	1.11589e-05	1.11589	10.059	0.639943	1	C/T/Y	0.931668	2.465	0	3	1	2	Intron (ENSSSCT00000062929.2/ENSSSCG00000004070.4, intron 21 of 24)	1	11648508	11799068	150561	2	ENSSSCT00000023199.3	-139082	ENSSSCG00000004065	ENSSSCG00000004065
chr1:11938151	chr1	11938151	S1_11938151	C	T	C	T	0.64286	0.35714	0	3	0.42857	T	0.3333	0.375	C	2	1.02319	0.437652	-0.968862	2.03911	0.226485	-0.728125	0.72016	0.443892	5	0.338447	0.598904	0.496181	11.6941	0.764351	1	C/T/Y	-0.240738	1.69699	0	3	1	3	Intron (ENSSSCT00000062929.2/ENSSSCG00000004070.4, intron 21 of 24)	1	11648508	11799068	150561	2	ENSSSCT00000023199.3	-139083	ENSSSCG00000004065	ENSSSCG00000004065
chr1:12230352	chr1	12230352	S1_12230352	C	A	C	A	0.64286	0.35714	0	3	0.42857	A	0.3333	0.375	C	2	0.207882	0.820556	-0.232684	0.097223	0.770764	-0.443504	0.177101	0.695503	5	0.0941544	0.0223528	1.65216	13.4244	0.940348	1	A/C/M	0.21082	0.676189	0	1	3	3	Distal Intergenic	1	12182683	12186093	3411	2	ENSSSCT00000087929.1	-44259	ENSSSCG00000044991	ENSSSCG00000044991
chr1:12230365	chr1	12230365	S1_12230365	T	C	T	C	0.64286	0.35714	0	3	0.42857	C	0.3333	0.375	T	2	0.207882	0.820556	-0.232684	0.097223	0.770764	-0.443504	0.177101	0.695503	5	0.0941544	0.0223528	1.65216	13.4244	0.940348	1	C/T/Y	0.21082	0.676189	0	1	3	3	Distal Intergenic	1	12182683	12186093	3411	2	ENSSSCT00000087929.1	-44272	ENSSSCG00000044991	ENSSSCG00000044991
chr1:12409131	chr1	12409131	S1_12409131	T	C	T	C	0.64286	0.35714	0	3	0.42857	C	0.6667	0.125	T	2	0.599827	0.591795	-0.602364	0.717195	0.44476	-0.342831	0.115652	0.750907	5	0.230718	0.994597	0.338317	11.9189	0.823633	1	C/T/Y	-0.259533	0.945196	0	1	3	3	Distal Intergenic	1	12397660	12404024	6365	1	ENSSSCT00000072482.1	11471	ENSSSCG00000043123	ENSSSCG00000043123
chr1:12425029	chr1	12425029	S1_12425029	T	C	T	C	0.58333	0.41667	0.14286	3	0.5	C	0.1667	0.6667	T	2	0.902992	0.493183	0.51761	0.993777	0.392293	0.792847	0.824656	0.430771	4	0.19033	0.956057	9.56057e-06	10.5069	0.781202	1	C/T/Y	-0.275237	-1.31046	0	1	2	3	Distal Intergenic	1	12397660	12404024	6365	1	ENSSSCT00000072482.1	27369	ENSSSCG00000043123	ENSSSCG00000043123
chr1:12425064	chr1	12425064	S1_12425064	A	G	A	G	0.58333	0.41667	0.14286	3	0.5	G	0.1667	0.6667	A	2	0.902992	0.493183	-0.51761	0.993777	0.392293	0.792847	0.824656	0.430771	4	0.19033	0.956057	9.56057e-06	10.5069	0.781202	1	A/G/R	-1.31046	-0.275237	0	2	1	3	Distal Intergenic	1	12397660	12404024	6365	1	ENSSSCT00000072482.1	27404	ENSSSCG00000043123	ENSSSCG00000043123
chr1:12457935	chr1	12457935	S1_12457935	A	C	A	C	0.625	0.375	0.42857	1	0.25	C	0.3333	0.5	A	2	30.1623	0.127697	0.276153	2.81847	0.342003	2.73748	60.2888	0.0815413	2	0.972481	0.057568	5.7568e-07	Inf	0.426259	1	A/C/M	-2.46133	-3.01363	0	2	1	1	Distal Intergenic	1	12482050	12485211	3162	2	ENSSSCT00000080620.1	27276	ENSSSCG00000049297	ENSSSCG00000049297
chr1:12457938	chr1	12457938	S1_12457938	C	G	G	C	0.625	0.375	0.42857	1	0.25	C	0.3333	0.5	G	2	30.1623	0.127697	-0.276153	2.81847	0.342003	2.73748	60.2888	0.0815413	2	0.972481	0.057568	5.7568e-07	Inf	0.426259	1	C/G/S	-3.01363	-2.46133	0	1	2	1	Distal Intergenic	1	12482050	12485211	3162	2	ENSSSCT00000080620.1	27273	ENSSSCG00000049297	ENSSSCG00000049297
chr1:12489460	chr1	12489460	S1_12489460	G	A	G	A	0.78571	0.21429	0	1	0.14286	A	0	0.375	G	2	18797.8	1.13176e-08	0.5614	0.781663	0.426574	0.288606	0.20657	0.673041	5	0.999894	0.960919	9.60919e-06	11.6621	8.89569e-08	0.00102627	A/G/R	0.272794	-0.850006	0	1	5	1	Distal Intergenic	1	12482050	12485211	3162	2	ENSSSCT00000080620.1	-4249	ENSSSCG00000049297	ENSSSCG00000049297
chr1:12612466	chr1	12612466	S1_12612466	G	A	G	A	0.6	0.4	0.28571	2	0.4	A	0.25	0.5	G	2	0.0690706	0.935392	0.234373	0.0597485	0.829684	-0.467413	0.113113	0.768636	3	0.0643024	1.41486	0.497919	7.12555	1	1	A/G/R	0.701785	0.23304	0	1	2	2	Intron (ENSSSCT00000004503.4/ENSSSCG00000004074.4, intron 3 of 4)	1	12527871	12602656	74786	1	ENSSSCT00000081158.1	84595	ENSSSCG00000046319	ENSSSCG00000046319
chr1:12891845	chr1	12891845	S1_12891845	G	T	G	T	0.7	0.3	0.28571	1	0.2	T	0.5	0.1667	G	2	1.91396	0.343176	0.724803	2.08726	0.285385	1.91691	2.71876	0.240948	3	0.632575	0.662489	0.0145673	5.02	0.696766	1	G/T/K	-1.19211	-2.64172	0	3	1	1	Distal Intergenic	1	13010756	13029219	18464	2	ENSSSCT00000090721.1	137374	ENSSSCG00000041027	ENSSSCG00000041027
chr1:13255864	chr1	13255864	S1_13255864	A	G	A	G	0.5	0.5	0.28571	1	0.2	A	0.75	0.3333	G	2	2.91582	0.255374	-0.602499	2.2783	0.270257	-1.6825	3.55336	0.200089	3	0.744626	6.37319e-06	0.637319	4.77481	0.581354	1	A/G/R	1.08	2.285	0	2	2	1	Distal Intergenic	1	13178845	13181892	3048	2	ENSSSCT00000076414.1	-73972	ENSSSCG00000050641	ENSSSCG00000050641
chr1:13256038	chr1	13256038	S1_13256038	T	A	A	T	0.58333	0.41667	0.14286	1	0.16667	T	0.6667	0.1667	A	2	1.73139	0.316266	0.655228	1.6542	0.288663	1.22999	1.90911	0.260978	4	0.000556847	0.956057	9.56057e-06	10.5069	0.663397	1	A/T/W	-0.574764	-1.88522	0	3	2	1	Distal Intergenic	1	13178845	13181892	3048	2	ENSSSCT00000076414.1	-74146	ENSSSCG00000050641	ENSSSCG00000050641
chr1:13407172	chr1	13407172	S1_13407172	A	G	A	G	0.5	0.5	0	1	0.14286	G	0.8333	0.25	A	2	9.61681	0.0296406	0.901664	15.2548	0.0174565	-1.21833	3.97879	0.116823	5	0.827836	3.19764e-06	0.319764	6.79086	0.126418	1	A/G/R	2.12	0.316669	0	3	3	1	Intron (ENSSSCT00000004504.4/ENSSSCG00000004075.4, intron 1 of 4)	1	13446490	13457938	11449	1	ENSSSCT00000087306.1	-39318	ENSSSCG00000004076	ENSSSCG00000004076
chr1:13452290	chr1	13452290	S1_13452290	C	A	C	A	0.64286	0.35714	0	3	0.42857	A	0.6667	0.125	C	2	9.16464	0.03209	-0.874999	6.90335	0.0583436	-1.05166	4.98619	0.0893152	5	0.820863	3.32714e-06	0.332714	6.94967	0.135596	1	A/C/M	0.176664	1.92666	0	1	3	3	Intron (ENSSSCT00000087306.1/ENSSSCG00000004076.4, intron 2 of 5)	1	13446490	13458288	11799	1	ENSSSCT00000004505.4	5800	ENSSSCG00000004076	ENSSSCG00000004076
chr1:13452326	chr1	13452326	S1_13452326	T	C	T	C	0.64286	0.35714	0	3	0.42857	C	0.6667	0.125	T	2	9.16464	0.03209	-0.874999	6.90335	0.0583436	-1.05166	4.98619	0.0893152	5	0.820863	3.32714e-06	0.332714	6.94967	0.135596	1	C/T/Y	0.176664	1.92666	0	1	3	3	Intron (ENSSSCT00000087306.1/ENSSSCG00000004076.4, intron 2 of 5)	1	13446490	13458288	11799	1	ENSSSCT00000004505.4	5836	ENSSSCG00000004076	ENSSSCG00000004076
chr1:13452329	chr1	13452329	S1_13452329	G	A	G	A	0.64286	0.35714	0	3	0.42857	A	0.6667	0.125	G	2	9.16464	0.03209	-0.874999	6.90335	0.0583436	-1.05166	4.98619	0.0893152	5	0.820863	3.32714e-06	0.332714	6.94967	0.135596	1	A/G/R	0.176664	1.92666	0	1	3	3	Intron (ENSSSCT00000087306.1/ENSSSCG00000004076.4, intron 2 of 5)	1	13446490	13458288	11799	1	ENSSSCT00000004505.4	5839	ENSSSCG00000004076	ENSSSCG00000004076
chr1:13492213	chr1	13492213	S1_13492213	G	A	G	A	0.71429	0.28571	0	2	0.28571	A	0.6667	0	G	2	7.21386	0.0471169	-0.71717	4.17433	0.110551	-1.25092	4.91298	0.0909631	5	0.782936	0.0772447	0.301178	7.47539	0.195368	1	A/G/R	0.533747	1.96809	0	1	4	2	Intron (ENSSSCT00000071576.1/ENSSSCG00000004077.4, intron 6 of 6)	1	13467501	13505936	38436	1	ENSSSCT00000071576.1	24712	ENSSSCG00000004077	ENSSSCG00000004077
chr1:13492216	chr1	13492216	S1_13492216	A	G	A	G	0.71429	0.28571	0	2	0.28571	G	0.6667	0	A	2	7.21386	0.0471169	0.71717	4.17433	0.110551	-1.25092	4.91298	0.0909631	5	0.782936	0.0772447	0.301178	7.47539	0.195368	1	A/G/R	1.96809	0.533747	0	4	1	2	Intron (ENSSSCT00000071576.1/ENSSSCG00000004077.4, intron 6 of 6)	1	13467501	13505936	38436	1	ENSSSCT00000071576.1	24715	ENSSSCG00000004077	ENSSSCG00000004077
chr1:13745053	chr1	13745053	S1_13745053	G	A	G	A	0.64286	0.35714	0	3	0.42857	A	0.5	0.25	G	2	138078	2.09798e-10	-0.425001	276123	7.86931e-11	-1.54996	26.6246	0.00669847	5	0.999986	0.130831	1.30831e-06	3.98773	3.01876e-09	1.90242e-05	A/G/R	1.12496	1.97496	0	1	3	3	Intron (ENSSSCT00000077268.1/ENSSSCG00000004081.4, intron 2 of 19)	1	13716342	13908554	192213	1	ENSSSCT00000087508.1	28711	ENSSSCG00000004081	ENSSSCG00000004081
chr1:13745059	chr1	13745059	S1_13745059	T	C	T	C	0.64286	0.35714	0	3	0.42857	C	0.5	0.25	T	2	138078	2.09798e-10	-0.425001	276123	7.86931e-11	-1.54996	26.6246	0.00669847	5	0.999986	0.130831	1.30831e-06	3.98773	3.01876e-09	1.90242e-05	C/T/Y	1.12496	1.97496	0	1	3	3	Intron (ENSSSCT00000077268.1/ENSSSCG00000004081.4, intron 2 of 19)	1	13716342	13908554	192213	1	ENSSSCT00000087508.1	28717	ENSSSCG00000004081	ENSSSCG00000004081
chr1:13745092	chr1	13745092	S1_13745092	C	T	C	T	0.64286	0.35714	0	3	0.42857	T	0.5	0.25	C	2	138078	2.09798e-10	0.425001	276123	7.86931e-11	-1.54996	26.6246	0.00669847	5	0.999986	0.130831	1.30831e-06	3.98773	3.01876e-09	1.90242e-05	C/T/Y	1.97496	1.12496	0	3	1	3	Intron (ENSSSCT00000077268.1/ENSSSCG00000004081.4, intron 2 of 19)	1	13716342	13908554	192213	1	ENSSSCT00000087508.1	28750	ENSSSCG00000004081	ENSSSCG00000004081
chr1:13923699	chr1	13923699	S1_13923699	C	T	C	T	0.7	0.3	0.28571	1	0.2	T	0.3333	0.25	C	2	5.19328	0.161465	-0.0883326	0.0519559	0.840877	2.36833	9.33719	0.0924817	3	0.838535	4.5053e-06	0.45053	4.08111	0.501714	1	C/T/Y	-2.45667	-2.28	0	3	1	1	Distal Intergenic	1	13972615	14019955	47341	1	ENSSSCT00000073986.1	-48916	ENSSSCG00000049158	ENSSSCG00000049158
chr1:13965823	chr1	13965823	S1_13965823	A	G	G	A	0.57143	0.42857	0	4	0.57143	A	0.5	0.375	G	2	20437.5	9.57457e-09	-0.425	40873.2	3.5909e-09	-0.914146	1.39374	0.303181	5	0.999902	0.883832	8.83832e-06	11.7635	8.28921e-08	0.000868212	A/G/R	0.489146	1.33915	0	1	2	4	Distal Intergenic	1	13972615	14019955	47341	1	ENSSSCT00000073986.1	-6792	ENSSSCG00000049158	ENSSSCG00000049158
chr1:13965828	chr1	13965828	S1_13965828	C	T	C	T	0.64286	0.35714	0	3	0.42857	T	0.3333	0.375	C	2	12490.9	2.5629e-08	0.424995	24981.8	9.61145e-09	-0.127384	0.0145157	0.909911	5	0.99984	1.44602	1.44602e-05	13.4843	1.31662e-07	0.00232401	C/T/Y	0.552378	-0.297611	0	3	1	3	Distal Intergenic	1	13972615	14019955	47341	1	ENSSSCT00000073986.1	-6787	ENSSSCG00000049158	ENSSSCG00000049158
chr1:13995392	chr1	13995392	S1_13995392	G	A	G	A	0.64286	0.35714	0	3	0.42857	A	0.5	0.25	G	2	19236.7	1.08071e-08	-0.610379	1.12226	0.349164	1.46037	6.42397	0.0643521	5	0.999896	0.938997	9.38997e-06	11.1533	8.89569e-08	0.000979975	A/G/R	-2.07075	-0.849989	0	1	3	3	Intron (ENSSSCT00000073986.1/ENSSSCG00000049158.1, intron 12 of 25)	1	14004764	14024472	19709	1	ENSSSCT00000067578.1	-9372	ENSSSCG00000049158	ENSSSCG00000049158
chr1:13995413	chr1	13995413	S1_13995413	T	C	T	C	0.64286	0.35714	0	3	0.42857	C	0.5	0.25	T	2	19236.7	1.08071e-08	-0.610379	1.12226	0.349164	1.46037	6.42397	0.0643521	5	0.999896	0.938997	9.38997e-06	11.1533	8.89569e-08	0.000979975	C/T/Y	-2.07075	-0.849989	0	1	3	3	Intron (ENSSSCT00000073986.1/ENSSSCG00000049158.1, intron 12 of 25)	1	14004764	14024472	19709	1	ENSSSCT00000067578.1	-9351	ENSSSCG00000049158	ENSSSCG00000049158
chr1:13997542	chr1	13997542	S1_13997542	C	T	C	T	0.71429	0.28571	0	2	0.28571	T	0.1667	0.375	C	2	14926.2	1.79492e-08	-0.641446	0.810305	0.418925	0.208545	0.0856475	0.784338	5	0.999866	1.21013	1.21013e-05	12.1145	1.02812e-07	0.00162761	C/T/Y	-0.849991	0.432901	0	4	1	2	Intron (ENSSSCT00000073986.1/ENSSSCG00000049158.1, intron 13 of 25)	1	14004764	14024472	19709	1	ENSSSCT00000067578.1	-7222	ENSSSCG00000049158	ENSSSCG00000049158
chr1:13997663	chr1	13997663	S1_13997663	G	A	G	A	0.58333	0.41667	0.14286	1	0.16667	A	0.25	0.5	G	2	21877.3	5.67676e-07	0.424999	43753.8	2.40941e-07	-1.09189	1.00789	0.389378	4	0.999931	0.825647	8.25647e-06	9.25474	2.78521e-06	0.0514763	A/G/R	1.51688	0.666887	0	2	3	1	Intron (ENSSSCT00000073986.1/ENSSSCG00000049158.1, intron 13 of 25)	1	14004764	14024472	19709	1	ENSSSCT00000067578.1	-7101	ENSSSCG00000049158	ENSSSCG00000049158
chr1:14054942	chr1	14054942	S1_14054942	T	A	T	A	0.64286	0.35714	0	3	0.42857	A	0.3333	0.375	T	2	12490.9	2.5629e-08	-0.424995	24981.8	9.61145e-09	-0.127384	0.0145157	0.909911	5	0.99984	1.44602	1.44602e-05	13.4843	1.31662e-07	0.00232401	A/T/W	-0.297611	0.552378	0	1	3	3	Intron (ENSSSCT00000082300.1/ENSSSCG00000004082.4, intron 4 of 51)	1	14070069	14091908	21840	1	ENSSSCT00000050808.1	-15127	ENSSSCG00000031744	ENSSSCG00000031744
chr1:14181415	chr1	14181415	S1_14181415	C	G	C	G	0.64286	0.35714	0	3	0.42857	G	0.3333	0.375	C	2	12490.9	2.5629e-08	0.424995	24981.8	9.61145e-09	-0.127384	0.0145157	0.909911	5	0.99984	1.44602	1.44602e-05	13.4843	1.31662e-07	0.00232401	C/G/S	0.552378	-0.297611	0	3	1	3	Intron (ENSSSCT00000082300.1/ENSSSCG00000004082.4, intron 46 of 51)	1	14152489	14201706	49218	1	ENSSSCT00000089249.1	28926	ENSSSCG00000004082	ENSSSCG00000004082
chr1:14181493	chr1	14181493	S1_14181493	G	A	G	A	0.71429	0.28571	0	2	0.28571	A	0.3333	0.25	G	2	18286	1.19599e-08	-0.424997	36570.4	4.48551e-09	-0.963649	1.08595	0.356209	5	0.999891	0.987809	9.87809e-06	11.9646	8.89569e-08	0.00108451	A/G/R	0.538652	1.38865	0	1	4	2	Intron (ENSSSCT00000082300.1/ENSSSCG00000004082.4, intron 46 of 51)	1	14152489	14201706	49218	1	ENSSSCT00000089249.1	29004	ENSSSCG00000004082	ENSSSCG00000004082
chr1:14181648	chr1	14181648	S1_14181648	G	A	G	A	0.71429	0.28571	0	2	0.28571	A	0.3333	0.25	G	2	18286	1.19599e-08	-0.424997	36570.4	4.48551e-09	-0.963649	1.08595	0.356209	5	0.999891	0.987809	9.87809e-06	11.9646	8.89569e-08	0.00108451	A/G/R	0.538652	1.38865	0	1	4	2	Intron (ENSSSCT00000082300.1/ENSSSCG00000004082.4, intron 46 of 51)	1	14152489	14201706	49218	1	ENSSSCT00000089249.1	29159	ENSSSCG00000004082	ENSSSCG00000004082
chr1:14181653	chr1	14181653	S1_14181653	A	G	A	G	0.71429	0.28571	0	2	0.28571	G	0.3333	0.25	A	2	18286	1.19599e-08	0.424997	36570.4	4.48551e-09	-0.963649	1.08595	0.356209	5	0.999891	0.987809	9.87809e-06	11.9646	8.89569e-08	0.00108451	A/G/R	1.38865	0.538652	0	4	1	2	Intron (ENSSSCT00000082300.1/ENSSSCG00000004082.4, intron 46 of 51)	1	14152489	14201706	49218	1	ENSSSCT00000089249.1	29164	ENSSSCG00000004082	ENSSSCG00000004082
chr1:14181660	chr1	14181660	S1_14181660	G	A	G	A	0.71429	0.28571	0	2	0.28571	A	0.3333	0.25	G	2	18286	1.19599e-08	-0.424997	36570.4	4.48551e-09	-0.963649	1.08595	0.356209	5	0.999891	0.987809	9.87809e-06	11.9646	8.89569e-08	0.00108451	A/G/R	0.538652	1.38865	0	1	4	2	Intron (ENSSSCT00000082300.1/ENSSSCG00000004082.4, intron 46 of 51)	1	14152489	14201706	49218	1	ENSSSCT00000089249.1	29171	ENSSSCG00000004082	ENSSSCG00000004082
chr1:14214928	chr1	14214928	S1_14214928	A	G	A	G	0.64286	0.35714	0	3	0.42857	G	0.3333	0.375	A	2	12490.9	2.5629e-08	0.424995	24981.8	9.61145e-09	-0.127384	0.0145157	0.909911	5	0.99984	1.44602	1.44602e-05	13.4843	1.31662e-07	0.00232401	A/G/R	0.552378	-0.297611	0	3	1	3	Downstream (2-3kb)	1	14152489	14201706	49218	1	ENSSSCT00000089249.1	62439	ENSSSCG00000004082	ENSSSCG00000004082
chr1:14230752	chr1	14230752	S1_14230752	C	T	T	C	0.64286	0.35714	0	3	0.42857	C	0.3333	0.375	T	2	12490.9	2.5629e-08	-0.424995	24981.8	9.61145e-09	-0.127384	0.0145157	0.909911	5	0.99984	1.44602	1.44602e-05	13.4843	1.31662e-07	0.00232401	C/T/Y	-0.297611	0.552378	0	1	3	3	Intron (ENSSSCT00000079800.1/ENSSSCG00000025777.4, intron 2 of 3)	1	14152489	14201706	49218	1	ENSSSCT00000089249.1	78263	ENSSSCG00000004082	ENSSSCG00000004082
chr1:14230766	chr1	14230766	S1_14230766	C	T	C	T	0.64286	0.35714	0	3	0.42857	T	0.3333	0.375	C	2	12490.9	2.5629e-08	0.424995	24981.8	9.61145e-09	-0.127384	0.0145157	0.909911	5	0.99984	1.44602	1.44602e-05	13.4843	1.31662e-07	0.00232401	C/T/Y	0.552378	-0.297611	0	3	1	3	Intron (ENSSSCT00000079800.1/ENSSSCG00000025777.4, intron 2 of 3)	1	14152489	14201706	49218	1	ENSSSCT00000089249.1	78277	ENSSSCG00000004082	ENSSSCG00000004082
chr1:14230844	chr1	14230844	S1_14230844	G	T	G	T	0.64286	0.35714	0	3	0.42857	T	0.3333	0.375	G	2	12490.9	2.5629e-08	0.424995	24981.8	9.61145e-09	-0.127384	0.0145157	0.909911	5	0.99984	1.44602	1.44602e-05	13.4843	1.31662e-07	0.00232401	G/T/K	0.552378	-0.297611	0	3	1	3	Intron (ENSSSCT00000079800.1/ENSSSCG00000025777.4, intron 2 of 3)	1	14152489	14201706	49218	1	ENSSSCT00000089249.1	78355	ENSSSCG00000004082	ENSSSCG00000004082
chr1:14812201	chr1	14812201	S1_14812201	T	G	T	G	0.58333	0.41667	0.14286	3	0.5	G	0.5	0.3333	T	2	0.724972	0.553541	-0.7562	1.24702	0.345504	0.620896	0.441264	0.554008	4	0.325754	0.69589	0.359182	9.09608	0.808195	1	G/T/K	-1.3771	0.135304	0	1	2	3	Intron (ENSSSCT00000066077.2/ENSSSCG00000004089.4, intron 3 of 11)	1	14795762	14851229	55468	1	ENSSSCT00000004520.4	16439	ENSSSCG00000004089	ENSSSCG00000004089
chr1:14812231	chr1	14812231	S1_14812231	A	T	A	T	0.58333	0.41667	0.14286	3	0.5	T	0.5	0.3333	A	2	0.724972	0.553541	0.7562	1.24702	0.345504	0.620896	0.441264	0.554008	4	0.325754	0.69589	0.359182	9.09608	0.808195	1	A/T/W	0.135304	-1.3771	0	2	1	3	Intron (ENSSSCT00000066077.2/ENSSSCG00000004089.4, intron 3 of 11)	1	14795762	14851229	55468	1	ENSSSCT00000004520.4	16469	ENSSSCG00000004089	ENSSSCG00000004089
chr1:14827917	chr1	14827917	S1_14827917	A	T	A	T	0.5	0.5	0	1	0.14286	T	0.3333	0.625	A	2	15168.2	1.7381e-08	-0.519063	1.18867	0.336875	-0.33093	0.483128	0.525273	5	0.999868	1.19082	1.19082e-05	12.7228	1.01507e-07	0.00157609	A/T/W	-0.188132	0.849993	0	3	3	1	Intron (ENSSSCT00000066077.2/ENSSSCG00000004089.4, intron 10 of 11)	1	14855137	14865107	9971	1	ENSSSCT00000085007.1	-27220	ENSSSCG00000050987	ENSSSCG00000050987
chr1:14827920	chr1	14827920	S1_14827920	C	G	C	G	0.5	0.5	0	1	0.14286	G	0.3333	0.625	C	2	15168.2	1.7381e-08	-0.519063	1.18867	0.336875	-0.33093	0.483128	0.525273	5	0.999868	1.19082	1.19082e-05	12.7228	1.01507e-07	0.00157609	C/G/S	-0.188132	0.849993	0	3	3	1	Intron (ENSSSCT00000066077.2/ENSSSCG00000004089.4, intron 10 of 11)	1	14855137	14865107	9971	1	ENSSSCT00000085007.1	-27217	ENSSSCG00000050987	ENSSSCG00000050987
chr1:14843576	chr1	14843576	S1_14843576	G	C	C	G	0.5	0.5	0	1	0.14286	G	0.5	0.5	C	2	15230.4	1.72395e-08	-0.424997	30460.4	6.46525e-09	-0.728218	0.320552	0.60153	5	0.999869	1.18597	1.18597e-05	12.101	1.01169e-07	0.00156326	C/G/S	0.303221	1.15322	0	3	3	1	Intron (ENSSSCT00000066077.2/ENSSSCG00000004089.4, intron 10 of 11)	1	14855137	14865107	9971	1	ENSSSCT00000085007.1	-11561	ENSSSCG00000050987	ENSSSCG00000050987
chr1:14843611	chr1	14843611	S1_14843611	T	C	C	T	0.5	0.5	0	1	0.14286	T	0.5	0.5	C	2	15230.4	1.72395e-08	-0.424997	30460.4	6.46525e-09	-0.728218	0.320552	0.60153	5	0.999869	1.18597	1.18597e-05	12.101	1.01169e-07	0.00156326	C/T/Y	0.303221	1.15322	0	3	3	1	Intron (ENSSSCT00000066077.2/ENSSSCG00000004089.4, intron 10 of 11)	1	14855137	14865107	9971	1	ENSSSCT00000085007.1	-11526	ENSSSCG00000050987	ENSSSCG00000050987
chr1:14843619	chr1	14843619	S1_14843619	C	T	C	T	0.64286	0.35714	0	1	0.14286	T	0.5	0.25	C	2	0.305122	0.752787	-0.216204	0.342721	0.589698	-0.801492	0.312055	0.606214	5	0.132367	1.17162	0.353887	13.2524	0.906269	1	C/T/Y	0.585288	1.0177	0	4	2	1	Intron (ENSSSCT00000066077.2/ENSSSCG00000004089.4, intron 10 of 11)	1	14855137	14865107	9971	1	ENSSSCT00000085007.1	-11518	ENSSSCG00000050987	ENSSSCG00000050987
chr1:14881701	chr1	14881701	S1_14881701	A	G	A	G	0.57143	0.42857	0	2	0.28571	G	0.5	0.375	A	2	16196.4	1.52445e-08	0.425002	32392.9	5.71693e-09	0.141171	0.0194469	0.895832	5	0.999877	1.11524	1.11524e-05	11.9848	9.61171e-08	0.00138236	A/G/R	0.283831	-0.566173	0	3	2	2	Intron (ENSSSCT00000004521.4/ENSSSCG00000004090.4, intron 1 of 3)	1	14866252	14894948	28697	1	ENSSSCT00000004521.4	15449	ENSSSCG00000004090	ENSSSCG00000004090
chr1:14901193	chr1	14901193	S1_14901193	T	C	T	C	0.66667	0.33333	0.14286	2	0.33333	C	0.25	0.375	T	2	0.283549	0.771275	-0.353334	0.260498	0.644961	-0.398327	0.132426	0.740064	4	0.15898	1.43776e-05	1.43776	10.8193	0.91773	1	C/T/Y	0.0449924	0.751661	0	1	3	2	Distal Intergenic	1	14866252	14894948	28697	1	ENSSSCT00000004521.4	34941	ENSSSCG00000004090	ENSSSCG00000004090
chr1:14961536	chr1	14961536	S1_14961536	C	T	C	T	0.5	0.5	0.14286	2	0.33333	T	0.8333	0.1667	C	2	6.80564	0.0767498	1.2325	13.609	0.0345396	0.0275022	0.00225874	0.965081	4	0.8194	4.46479e-06	0.446479	7.31097	0.271033	1	C/T/Y	1.205	-1.26	0	2	2	2	Intron (ENSSSCT00000063559.2/ENSSSCG00000031733.2, intron 1 of 5)	1	14908115	15017001	108887	2	ENSSSCT00000063559.2	55465	ENSSSCG00000031733	ENSSSCG00000031733
chr1:14969338	chr1	14969338	S1_14969338	T	C	T	C	0.78571	0.21429	0	1	0.14286	C	0	0.375	T	2	1.38519	0.349054	0.0979973	0.0291724	0.872673	1.808	2.29147	0.204646	5	0.409192	1.09732e-05	1.09732	11.723	0.696766	1	C/T/Y	-1.71	-1.906	0	1	5	1	Intron (ENSSSCT00000063559.2/ENSSSCG00000031733.2, intron 1 of 5)	1	14908115	15017001	108887	2	ENSSSCT00000063559.2	47663	ENSSSCG00000031733	ENSSSCG00000031733
chr1:15141199	chr1	15141199	S1_15141199	C	A	C	A	0.6	0.4	0.28571	2	0.4	A	0.5	0.3333	C	2	15.0588	0.0622713	-0.230218	1.15592	0.394797	-1.84688	29.9778	0.0317766	3	0.894429	0.122537	1.22537e-06	2.02906	0.231526	1	A/C/M	1.61666	2.0771	0	1	2	2	3' UTR	1	14908115	15017001	108887	2	ENSSSCT00000063559.2	-124198	ENSSSCG00000031733	ENSSSCG00000031733
chr1:15144455	chr1	15144455	S1_15144455	A	G	A	G	0.64286	0.35714	0	1	0.14286	G	0.5	0.25	A	2	0.353398	0.72222	0.331245	0.370743	0.575484	-0.676251	0.243981	0.64724	5	0.150165	1.57841e-05	1.57841	13.1772	0.884596	1	A/G/R	1.0075	0.345006	0	4	2	1	Intron (ENSSSCT00000071031.1/ENSSSCG00000004092.4, intron 26 of 26)	1	14908115	15017001	108887	2	ENSSSCT00000063559.2	-127454	ENSSSCG00000031733	ENSSSCG00000031733
chr1:15150286	chr1	15150286	S1_15150286	A	G	A	G	0.5	0.5	0.14286	2	0.33333	G	0.6667	0.3333	A	2	2.70421	0.213113	0.784998	2.79449	0.193182	-1.315	2.61395	0.20435	4	0.643215	8.82042e-06	0.882042	9.35351	0.526111	1	A/G/R	2.1	0.530004	0	2	2	2	Intron (ENSSSCT00000071031.1/ENSSSCG00000004092.4, intron 25 of 26)	1	14908115	15017001	108887	2	ENSSSCT00000063559.2	-133285	ENSSSCG00000031733	ENSSSCG00000031733
chr1:15178657	chr1	15178657	S1_15178657	C	T	C	T	0.57143	0.42857	0	2	0.28571	T	0.3333	0.5	C	2	0.830762	0.499175	0.171826	0.201478	0.676774	-1.14738	1.3695	0.306864	5	0.293477	0.766628	0.414137	12.2665	0.781202	1	C/T/Y	1.3192	0.975552	0	3	2	2	Intron (ENSSSCT00000071031.1/ENSSSCG00000004092.4, intron 25 of 26)	1	15140898	15320610	179713	2	ENSSSCT00000071031.1	141953	ENSSSCG00000004092	ENSSSCG00000004092
chr1:15178685	chr1	15178685	S1_15178685	A	G	A	G	0.57143	0.42857	0	4	0.57143	G	0.6667	0.25	A	2	0.862715	0.488094	0.759517	1.3083	0.316503	0.887606	1.1441	0.345039	5	0.301363	0.601691	0.555169	12.12	0.781202	1	A/G/R	-0.128089	-1.64712	0	2	1	4	Intron (ENSSSCT00000071031.1/ENSSSCG00000004092.4, intron 25 of 26)	1	15140898	15320610	179713	2	ENSSSCT00000071031.1	141925	ENSSSCG00000004092	ENSSSCG00000004092
chr1:15229454	chr1	15229454	S1_15229454	A	T	A	T	0.57143	0.42857	0	4	0.57143	T	0.1667	0.625	A	2	0.816436	0.504267	-0.869236	1.28499	0.320307	0.199279	0.0433398	0.845257	5	0.289883	0.865757	0.34518	11.4522	0.781202	1	A/T/W	-1.06851	0.669956	0	2	1	4	Intron (ENSSSCT00000071031.1/ENSSSCG00000004092.4, intron 19 of 26)	1	15140898	15320610	179713	2	ENSSSCT00000071031.1	91156	ENSSSCG00000004092	ENSSSCG00000004092
chr1:15229465	chr1	15229465	S1_15229465	T	C	T	C	0.57143	0.42857	0	4	0.57143	C	0.1667	0.625	T	2	0.816436	0.504267	0.869236	1.28499	0.320307	0.199279	0.0433398	0.845257	5	0.289883	0.865757	0.34518	11.4522	0.781202	1	C/T/Y	0.669956	-1.06851	0	1	2	4	Intron (ENSSSCT00000071031.1/ENSSSCG00000004092.4, intron 19 of 26)	1	15140898	15320610	179713	2	ENSSSCT00000071031.1	91145	ENSSSCG00000004092	ENSSSCG00000004092
chr1:15229471	chr1	15229471	S1_15229471	C	A	C	A	0.57143	0.42857	0	4	0.57143	A	0.1667	0.625	C	2	0.816436	0.504267	0.869236	1.28499	0.320307	0.199279	0.0433398	0.845257	5	0.289883	0.865757	0.34518	11.4522	0.781202	1	A/C/M	0.669956	-1.06851	0	1	2	4	Intron (ENSSSCT00000071031.1/ENSSSCG00000004092.4, intron 19 of 26)	1	15140898	15320610	179713	2	ENSSSCT00000071031.1	91139	ENSSSCG00000004092	ENSSSCG00000004092
chr1:15229476	chr1	15229476	S1_15229476	C	T	C	T	0.57143	0.42857	0	4	0.57143	T	0.1667	0.625	C	2	0.816436	0.504267	-0.869236	1.28499	0.320307	0.199279	0.0433398	0.845257	5	0.289883	0.865757	0.34518	11.4522	0.781202	1	C/T/Y	-1.06851	0.669956	0	2	1	4	Intron (ENSSSCT00000071031.1/ENSSSCG00000004092.4, intron 19 of 26)	1	15140898	15320610	179713	2	ENSSSCT00000071031.1	91134	ENSSSCG00000004092	ENSSSCG00000004092
chr1:15229521	chr1	15229521	S1_15229521	C	T	C	T	0.57143	0.42857	0	4	0.57143	T	0.1667	0.625	C	2	0.816436	0.504267	-0.869236	1.28499	0.320307	0.199279	0.0433398	0.845257	5	0.289883	0.865757	0.34518	11.4522	0.781202	1	C/T/Y	-1.06851	0.669956	0	2	1	4	Intron (ENSSSCT00000071031.1/ENSSSCG00000004092.4, intron 19 of 26)	1	15140898	15320610	179713	2	ENSSSCT00000071031.1	91089	ENSSSCG00000004092	ENSSSCG00000004092
chr1:15249401	chr1	15249401	S1_15249401	C	T	C	T	0.5	0.5	0.14286	4	0.66667	T	0.6667	0.3333	C	2	0.956686	0.477103	1.10978	1.51015	0.306719	0.576795	0.276237	0.635551	4	0.000404715	1.25755	1.25755e-05	10.7261	0.781202	1	C/T/Y	0.532985	-1.68658	0	1	1	4	Intron (ENSSSCT00000071031.1/ENSSSCG00000004092.4, intron 18 of 26)	1	15140898	15320610	179713	2	ENSSSCT00000071031.1	71209	ENSSSCG00000004092	ENSSSCG00000004092
chr1:15334283	chr1	15334283	S1_15334283	G	T	G	T	0.5	0.5	0	3	0.42857	T	0.3333	0.625	G	2	4.01051	0.110723	-0.537498	1.86984	0.243291	-1.48916	6.15117	0.0681998	5	0.66725	6.18023e-06	0.618023	9.42664	0.374273	1	G/T/K	0.951663	2.02666	0	2	2	3	Distal Intergenic	1	15140898	15329966	189069	2	ENSSSCT00000059971.2	-4317	ENSSSCG00000004092	ENSSSCG00000004092
chr1:15334401	chr1	15334401	S1_15334401	C	T	C	T	0.58333	0.41667	0.14286	3	0.5	T	0.25	0.5	C	2	16907.4	8.35536e-07	-0.46708	0.821845	0.431472	-0.382919	0.552347	0.511269	4	0.999911	1.06833	1.06833e-05	10.3934	4.03395e-06	0.0757656	C/T/Y	-0.0841613	0.849999	0	2	1	3	Distal Intergenic	1	15140898	15329966	189069	2	ENSSSCT00000059971.2	-4435	ENSSSCG00000004092	ENSSSCG00000004092
chr1:15391414	chr1	15391414	S1_15391414	G	A	G	A	0.71429	0.28571	0	2	0.28571	A	0.5	0.125	G	2	0.753115	0.52773	-0.734998	1.28122	0.320929	-0.0199921	0.000364583	0.985681	5	0.27355	1.34925e-05	1.34925	12.5497	0.794534	1	A/G/R	-0.715006	0.75499	0	1	4	2	Intron (ENSSSCT00000038405.2/ENSSSCG00000032778.2, intron 6 of 17)	1	15357031	15357214	184	1	ENSSSCT00000028147.2	34383	ENSSSCG00000026396	ENSSSCG00000026396
chr1:15428645	chr1	15428645	S1_15428645	T	C	C	T	0.5	0.5	0.14286	2	0.33333	T	0.5	0.5	C	2	0.0438962	0.957656	-0.221337	0.0833437	0.791615	0.0791143	0.00352806	0.956371	4	0.0284302	0.495052	1.74365	12.2736	1	1	C/T/Y	-0.300451	0.142223	0	2	2	2	Intron (ENSSSCT00000038405.2/ENSSSCG00000032778.2, intron 4 of 17)	1	15455384	15458120	2737	1	ENSSSCT00000073031.1	-26739	ENSSSCG00000046136	ENSSSCG00000046136
chr1:15428776	chr1	15428776	S1_15428776	G	A	G	A	0.57143	0.42857	0	2	0.28571	A	0.5	0.375	G	2	0.0795662	0.924942	0.16694	0.154153	0.714622	0.0537003	0.00204987	0.966058	5	0.038261	1.15855	0.476971	13.518	1	1	A/G/R	0.113239	-0.22064	0	2	3	2	Intron (ENSSSCT00000038405.2/ENSSSCG00000032778.2, intron 4 of 17)	1	15455384	15458120	2737	1	ENSSSCT00000073031.1	-26608	ENSSSCG00000046136	ENSSSCG00000046136
chr1:15428785	chr1	15428785	S1_15428785	T	A	T	A	0.57143	0.42857	0	2	0.28571	A	0.5	0.375	T	2	0.0795662	0.924942	0.16694	0.154153	0.714622	0.0537003	0.00204987	0.966058	5	0.038261	1.15855	0.476971	13.518	1	1	A/T/W	0.113239	-0.22064	0	2	3	2	Intron (ENSSSCT00000038405.2/ENSSSCG00000032778.2, intron 4 of 17)	1	15455384	15458120	2737	1	ENSSSCT00000073031.1	-26599	ENSSSCG00000046136	ENSSSCG00000046136
chr1:15428807	chr1	15428807	S1_15428807	T	C	T	C	0.57143	0.42857	0	2	0.28571	C	0.5	0.375	T	2	0.0795662	0.924942	0.16694	0.154153	0.714622	0.0537003	0.00204987	0.966058	5	0.038261	1.15855	0.476971	13.518	1	1	C/T/Y	0.113239	-0.22064	0	2	3	2	Intron (ENSSSCT00000038405.2/ENSSSCG00000032778.2, intron 4 of 17)	1	15455384	15458120	2737	1	ENSSSCT00000073031.1	-26577	ENSSSCG00000046136	ENSSSCG00000046136
chr1:15721622	chr1	15721622	S1_15721622	T	C	T	C	0.58333	0.41667	0.14286	1	0.16667	C	0.5	0.3333	T	2	1.07922	0.44351	-0.375831	0.471558	0.541589	-1.63083	1.53089	0.303997	4	0.418429	1.43776e-05	1.43776	10.8193	0.767663	1	C/T/Y	1.255	2.00666	0	2	3	1	Promoter (<=1kb)	1	15715274	15721823	6550	2	ENSSSCT00000079953.1	201	ENSSSCG00000046985	ENSSSCG00000046985
chr1:15734251	chr1	15734251	S1_15734251	A	G	G	A	0.6	0.4	0.28571	2	0.4	A	0.25	0.5	G	2	0.0587874	0.944477	0.219668	0.0546237	0.836949	-0.464065	0.101809	0.779912	3	0.0529596	1.85853	1.85853e-05	7.15196	1	1	A/G/R	0.683734	0.244397	0	1	2	2	Distal Intergenic	1	15730101	15731372	1272	1	ENSSSCT00000044531.2	4150	ENSSSCG00000040966	ENSSSCG00000040966
chr1:15734281	chr1	15734281	S1_15734281	C	T	T	C	0.6	0.4	0.28571	2	0.4	C	0.25	0.5	T	2	0.0587874	0.944477	0.219668	0.0546237	0.836949	-0.464065	0.101809	0.779912	3	0.0529596	1.85853	1.85853e-05	7.15196	1	1	C/T/Y	0.683734	0.244397	0	1	2	2	Distal Intergenic	1	15730101	15731372	1272	1	ENSSSCT00000044531.2	4180	ENSSSCG00000040966	ENSSSCG00000040966
chr1:15805679	chr1	15805679	S1_15805679	T	C	T	C	0.64286	0.35714	0	3	0.42857	C	0.3333	0.375	T	2	0.717457	0.54167	0.300002	0.19752	0.679717	-1.14333	1.43441	0.297163	5	0.264018	1.36695e-05	1.36695	12.6019	0.803241	1	C/T/Y	1.44333	0.843325	0	1	3	3	Distal Intergenic	1	15758046	15779164	21119	2	ENSSSCT00000004525.4	-26515	ENSSSCG00000004093	ENSSSCG00000004093
chr1:15940515	chr1	15940515	S1_15940515	T	C	T	C	0.6	0.4	0.28571	2	0.4	C	0	0.6667	T	2	9.60216	0.0943204	0.831727	7.03503	0.117595	1.00291	5.95781	0.13474	3	0.86386	0.185602	1.85602e-06	2.62655	0.325303	1	C/T/Y	-0.171184	-1.83464	0	1	2	2	Intron (ENSSSCT00000084792.1/ENSSSCG00000004094.4, intron 1 of 4)	1	15865220	15949956	84737	2	ENSSSCT00000084792.1	9441	ENSSSCG00000004094	ENSSSCG00000004094
chr1:15940544	chr1	15940544	S1_15940544	T	C	T	C	0.6	0.4	0.28571	2	0.4	C	0	0.6667	T	2	9.60216	0.0943204	0.831727	7.03503	0.117595	1.00291	5.95781	0.13474	3	0.86386	0.185602	1.85602e-06	2.62655	0.325303	1	C/T/Y	-0.171184	-1.83464	0	1	2	2	Intron (ENSSSCT00000084792.1/ENSSSCG00000004094.4, intron 1 of 4)	1	15865220	15949956	84737	2	ENSSSCT00000084792.1	9412	ENSSSCG00000004094	ENSSSCG00000004094
chr1:15946579	chr1	15946579	S1_15946579	A	C	A	C	0.57143	0.42857	0	2	0.28571	C	0.5	0.375	A	2	12881.7	2.40977e-08	0.376009	0.496632	0.519852	0.473981	0.789111	0.42456	5	0.999845	1.40216	1.40216e-05	13.0241	1.28652e-07	0.00218516	A/C/M	-0.0979722	-0.849989	0	3	2	2	Intron (ENSSSCT00000084792.1/ENSSSCG00000004094.4, intron 1 of 4)	1	15865220	15949956	84737	2	ENSSSCT00000084792.1	3377	ENSSSCG00000004094	ENSSSCG00000004094
chr1:15970425	chr1	15970425	S1_15970425	A	G	A	G	0.58333	0.41667	0.14286	1	0.16667	G	0.5	0.3333	A	2	1.03717	0.454582	0.264995	0.232096	0.662934	-1.69671	1.64254	0.290053	4	0.000424846	1.21765	1.21765e-05	10.7859	0.769888	1	A/G/R	1.9617	1.43171	0	3	2	1	Distal Intergenic	1	15886920	15949956	63037	2	ENSSSCT00000072625.1	-20469	ENSSSCG00000004094	ENSSSCG00000004094
chr1:15991638	chr1	15991638	S1_15991638	A	G	A	G	0.78571	0.21429	0	1	0.14286	G	0.1667	0.25	A	2	0.973494	0.452403	-0.35679	0.283531	0.6226	-1.82609	1.94167	0.235923	5	0.327391	0.790049	0.347801	11.2502	0.769888	1	A/G/R	1.4693	2.18288	0	5	1	1	Distal Intergenic	1	16007524	16014104	6581	1	ENSSSCT00000042802.2	-15886	ENSSSCG00000035574	ENSSSCG00000035574
chr1:15991661	chr1	15991661	S1_15991661	G	C	G	C	0.78571	0.21429	0	1	0.14286	C	0.1667	0.25	G	2	0.973494	0.452403	0.35679	0.283531	0.6226	-1.82609	1.94167	0.235923	5	0.327391	0.790049	0.347801	11.2502	0.769888	1	C/G/S	2.18288	1.4693	0	1	5	1	Distal Intergenic	1	16007524	16014104	6581	1	ENSSSCT00000042802.2	-15863	ENSSSCG00000035574	ENSSSCG00000035574
chr1:15991663	chr1	15991663	S1_15991663	G	A	G	A	0.78571	0.21429	0	1	0.14286	A	0.1667	0.25	G	2	0.973494	0.452403	0.35679	0.283531	0.6226	-1.82609	1.94167	0.235923	5	0.327391	0.790049	0.347801	11.2502	0.769888	1	A/G/R	2.18288	1.4693	0	1	5	1	Distal Intergenic	1	16007524	16014104	6581	1	ENSSSCT00000042802.2	-15861	ENSSSCG00000035574	ENSSSCG00000035574
chr1:16000833	chr1	16000833	S1_16000833	A	T	A	T	0.6	0.4	0.28571	2	0.4	T	0.25	0.5	A	2	0.0587874	0.944477	-0.219668	0.0546237	0.836949	-0.464065	0.101809	0.779912	3	0.0529596	1.85853	1.85853e-05	7.15196	1	1	A/T/W	0.244397	0.683734	0	2	1	2	Distal Intergenic	1	16007524	16014104	6581	1	ENSSSCT00000042802.2	-6691	ENSSSCG00000035574	ENSSSCG00000035574
chr1:16000840	chr1	16000840	S1_16000840	T	A	T	A	0.6	0.4	0.28571	2	0.4	A	0.25	0.5	T	2	0.0587874	0.944477	0.219668	0.0546237	0.836949	-0.464065	0.101809	0.779912	3	0.0529596	1.85853	1.85853e-05	7.15196	1	1	A/T/W	0.683734	0.244397	0	1	2	2	Distal Intergenic	1	16007524	16014104	6581	1	ENSSSCT00000042802.2	-6684	ENSSSCG00000035574	ENSSSCG00000035574
chr1:16001013	chr1	16001013	S1_16001013	G	A	G	A	0.78571	0.21429	0	1	0.14286	A	0.1667	0.25	G	2	0.563726	0.608579	0.431548	0.35198	0.584914	-1.5242	1.08345	0.356703	5	0.219885	0.998511	0.349074	11.8132	0.830517	1	A/G/R	1.95575	1.09265	0	1	5	1	Distal Intergenic	1	16007524	16014104	6581	1	ENSSSCT00000042802.2	-6511	ENSSSCG00000035574	ENSSSCG00000035574
chr1:16013739	chr1	16013739	S1_16013739	G	A	G	A	0.71429	0.28571	0	2	0.28571	A	0.1667	0.375	G	2	0.206258	0.821765	0.528365	0.405323	0.558963	-0.398425	0.100463	0.767128	5	0.0934876	1.24968	0.356721	12.3215	0.940348	1	A/G/R	0.926791	-0.12994	0	1	4	2	3' UTR	1	16007524	16014104	6581	1	ENSSSCT00000042802.2	6215	ENSSSCG00000035574	ENSSSCG00000035574
chr1:16123656	chr1	16123656	S1_16123656	T	C	T	C	0.78571	0.21429	0	1	0.14286	C	0.1667	0.25	T	2	0.973494	0.452403	0.35679	0.283531	0.6226	-1.82609	1.94167	0.235923	5	0.327391	0.790049	0.347801	11.2502	0.769888	1	C/T/Y	2.18288	1.4693	0	1	5	1	Distal Intergenic	1	16112815	16119674	6860	2	ENSSSCT00000004535.4	-3982	ENSSSCG00000026042	ENSSSCG00000026042
chr1:16127963	chr1	16127963	S1_16127963	G	C	G	C	0.78571	0.21429	0	1	0.14286	C	0.1667	0.25	G	2	0.973494	0.452403	0.35679	0.283531	0.6226	-1.82609	1.94167	0.235923	5	0.327391	0.790049	0.347801	11.2502	0.769888	1	C/G/S	2.18288	1.4693	0	1	5	1	Distal Intergenic	1	16112815	16119674	6860	2	ENSSSCT00000004535.4	-8289	ENSSSCG00000026042	ENSSSCG00000026042
chr1:16128031	chr1	16128031	S1_16128031	C	T	C	T	0.71429	0.28571	0	2	0.28571	T	0.1667	0.375	C	2	12646.3	2.50033e-08	0.138155	0.0756452	0.79691	0.711836	2.00812	0.22942	5	0.999842	1.42826	1.42826e-05	13.6425	1.30626e-07	0.00226727	C/T/Y	-0.573681	-0.849991	0	4	1	2	Distal Intergenic	1	16112815	16119674	6860	2	ENSSSCT00000004535.4	-8357	ENSSSCG00000026042	ENSSSCG00000026042
chr1:16149196	chr1	16149196	S1_16149196	A	G	A	G	0.66667	0.33333	0.14286	2	0.33333	G	0.1667	0.5	A	2	1.07922	0.44351	-1.00333	2.10049	0.243111	-0.751662	0.471558	0.541589	4	0.418429	1.43776e-05	1.43776	10.8193	0.767663	1	A/G/R	-0.251672	1.75499	0	3	1	2	Intron (ENSSSCT00000004536.4/ENSSSCG00000004101.4, intron 2 of 7)	1	16139496	16198969	59474	1	ENSSSCT00000062003.2	9700	ENSSSCG00000004101	ENSSSCG00000004101
chr1:16189991	chr1	16189991	S1_16189991	C	T	C	T	0.5	0.5	0.28571	1	0.2	T	0.25	0.6667	C	2	1.61212	0.38283	-0.685277	1.60369	0.332906	-1.32799	1.08251	0.407397	3	0.58624	1.07569	1.07569e-05	6.22865	0.708059	1	C/T/Y	0.642716	2.01327	0	2	2	1	Intron (ENSSSCT00000004536.4/ENSSSCG00000004101.4, intron 5 of 7)	1	16139496	16198969	59474	1	ENSSSCT00000062003.2	50495	ENSSSCG00000004101	ENSSSCG00000004101
chr1:16269631	chr1	16269631	S1_16269631	A	T	A	T	0.71429	0.28571	0	2	0.28571	T	0.3333	0.25	A	2	2.45579	0.20147	-0.247627	0.214808	0.667121	-1.79579	4.67407	0.0966766	5	0.551146	0.406121	0.336876	9.8695	0.526111	1	A/T/W	1.54816	2.04342	0	4	1	2	Distal Intergenic	1	16274970	16320619	45650	1	ENSSSCT00000004541.4	-5339	ENSSSCG00000004106	ENSSSCG00000004106
chr1:16270547	chr1	16270547	S1_16270547	C	T	C	T	0.64286	0.35714	0	1	0.14286	T	0.5	0.25	C	2	0.587499	0.597447	0.346816	0.390185	0.566065	-1.01906	0.551779	0.498847	5	0.227053	0.982422	0.350058	11.8373	0.823633	1	C/T/Y	1.36588	0.672247	0	4	2	1	Distal Intergenic	1	16274970	16320619	45650	1	ENSSSCT00000004541.4	-4423	ENSSSCG00000004106	ENSSSCG00000004106
chr1:16386577	chr1	16386577	S1_16386577	T	C	T	C	0.71429	0.28571	0	2	0.28571	C	0.3333	0.25	T	2	1.28739	0.370132	0.257794	0.160281	0.709359	-1.55175	2.51362	0.188048	5	0.391615	0.670609	0.348116	10.8994	0.706414	1	C/T/Y	1.80954	1.29395	0	1	4	2	Distal Intergenic	1	16360370	16381864	21495	2	ENSSSCT00000031837.3	-4713	ENSSSCG00000030067	ENSSSCG00000030067
chr1:16425068	chr1	16425068	S1_16425068	G	A	G	A	0.66667	0.33333	0.14286	2	0.33333	A	0.1667	0.5	G	2	11196.8	1.55028e-06	-0.013947	0.000620517	0.981691	0.836044	2.22965	0.232222	4	0.999866	1.61317	1.61317e-05	11.7043	7.35854e-06	0.140578	A/G/R	-0.849991	-0.822097	0	1	3	2	Intron (ENSSSCT00000024741.3/ENSSSCG00000028867.3, intron 11 of 12)	1	16400985	16446852	45868	1	ENSSSCT00000024741.3	24083	ENSSSCG00000028867	ENSSSCG00000028867
chr1:16425071	chr1	16425071	S1_16425071	A	G	A	G	0.66667	0.33333	0.14286	2	0.33333	G	0.1667	0.5	A	2	11196.8	1.55028e-06	0.013947	0.000620517	0.981691	0.836044	2.22965	0.232222	4	0.999866	1.61317	1.61317e-05	11.7043	7.35854e-06	0.140578	A/G/R	-0.822097	-0.849991	0	3	1	2	Intron (ENSSSCT00000024741.3/ENSSSCG00000028867.3, intron 11 of 12)	1	16400985	16446852	45868	1	ENSSSCT00000024741.3	24086	ENSSSCG00000028867	ENSSSCG00000028867
chr1:16465902	chr1	16465902	S1_16465902	A	T	A	T	0.75	0.25	0.14286	1	0.16667	T	0.5	0.125	A	2	19827.5	6.57938e-07	0.41425	0.52592	0.520776	1.26425	4.89824	0.113762	4	0.999924	0.910998	9.10998e-06	9.95532	3.21087e-06	0.0596612	A/T/W	-0.849997	-1.6785	0	4	1	1	Promoter (<=1kb)	1	16465252	16498971	33720	1	ENSSSCT00000004544.4	650	ENSSSCG00000004109	ENSSSCG00000004109
chr1:16469788	chr1	16469788	S1_16469788	C	T	C	T	0.71429	0.28571	0	2	0.28571	T	0.3333	0.25	C	2	2.45579	0.20147	-0.247627	0.214808	0.667121	-1.79579	4.67407	0.0966766	5	0.551146	0.406121	0.336876	9.8695	0.526111	1	C/T/Y	1.54816	2.04342	0	4	1	2	Intron (ENSSSCT00000004544.4/ENSSSCG00000004109.4, intron 2 of 6)	1	16465252	16498971	33720	1	ENSSSCT00000004544.4	4536	ENSSSCG00000004109	ENSSSCG00000004109
chr1:16498257	chr1	16498257	S1_16498257	T	C	T	C	0.57143	0.42857	0	4	0.57143	C	0.5	0.375	T	2	2.73084	0.178724	0.610002	1.26371	0.323848	-1.58999	5.15143	0.0857583	5	0.577242	7.85196e-06	0.785196	10.3843	0.510969	1	C/T/Y	2.2	0.979992	0	1	2	4	3' UTR	1	16465252	16498971	33720	1	ENSSSCT00000004544.4	33005	ENSSSCG00000004109	ENSSSCG00000004109
chr1:16518182	chr1	16518182	S1_16518182	C	T	C	T	0.78571	0.21429	0	1	0.14286	T	0.1667	0.25	C	2	0.973494	0.452403	-0.35679	0.283531	0.6226	-1.82609	1.94167	0.235923	5	0.327391	0.790049	0.347801	11.2502	0.769888	1	C/T/Y	1.4693	2.18288	0	5	1	1	Distal Intergenic	1	16465252	16498971	33720	1	ENSSSCT00000004544.4	52930	ENSSSCG00000004109	ENSSSCG00000004109
chr1:16522255	chr1	16522255	S1_16522255	G	A	G	A	0.78571	0.21429	0	1	0.14286	A	0.1667	0.25	G	2	0.973494	0.452403	0.35679	0.283531	0.6226	-1.82609	1.94167	0.235923	5	0.327391	0.790049	0.347801	11.2502	0.769888	1	A/G/R	2.18288	1.4693	0	1	5	1	Distal Intergenic	1	16465252	16498971	33720	1	ENSSSCT00000004544.4	57003	ENSSSCG00000004109	ENSSSCG00000004109
chr1:16524912	chr1	16524912	S1_16524912	A	G	A	G	0.78571	0.21429	0	1	0.14286	G	0.1667	0.25	A	2	0.973494	0.452403	-0.35679	0.283531	0.6226	-1.82609	1.94167	0.235923	5	0.327391	0.790049	0.347801	11.2502	0.769888	1	A/G/R	1.4693	2.18288	0	5	1	1	Distal Intergenic	1	16465252	16498971	33720	1	ENSSSCT00000004544.4	59660	ENSSSCG00000004109	ENSSSCG00000004109
chr1:16634922	chr1	16634922	S1_16634922	G	A	G	A	0.78571	0.21429	0	1	0.14286	A	0.1667	0.25	G	2	0.973494	0.452403	0.35679	0.283531	0.6226	-1.82609	1.94167	0.235923	5	0.327391	0.790049	0.347801	11.2502	0.769888	1	A/G/R	2.18288	1.4693	0	1	5	1	Distal Intergenic	1	16533284	16611884	78601	2	ENSSSCT00000058535.2	-23038	ENSSSCG00000004110	ENSSSCG00000004110
chr1:16731048	chr1	16731048	S1_16731048	A	G	A	G	0.78571	0.21429	0	1	0.14286	G	0.1667	0.25	A	2	0.973494	0.452403	-0.35679	0.283531	0.6226	-1.82609	1.94167	0.235923	5	0.327391	0.790049	0.347801	11.2502	0.769888	1	A/G/R	1.4693	2.18288	0	5	1	1	Distal Intergenic	1	16533284	16611884	78601	2	ENSSSCT00000058535.2	-119164	ENSSSCG00000004110	ENSSSCG00000004110
chr1:16743995	chr1	16743995	S1_16743995	G	A	G	A	0.78571	0.21429	0	1	0.14286	A	0.1667	0.25	G	2	0.973494	0.452403	0.35679	0.283531	0.6226	-1.82609	1.94167	0.235923	5	0.327391	0.790049	0.347801	11.2502	0.769888	1	A/G/R	2.18288	1.4693	0	1	5	1	Distal Intergenic	1	16533284	16611884	78601	2	ENSSSCT00000058535.2	-132111	ENSSSCG00000004110	ENSSSCG00000004110
chr1:16744102	chr1	16744102	S1_16744102	T	C	T	C	0.78571	0.21429	0	1	0.14286	C	0.1667	0.25	T	2	0.973494	0.452403	0.35679	0.283531	0.6226	-1.82609	1.94167	0.235923	5	0.327391	0.790049	0.347801	11.2502	0.769888	1	C/T/Y	2.18288	1.4693	0	1	5	1	Distal Intergenic	1	16533284	16611884	78601	2	ENSSSCT00000058535.2	-132218	ENSSSCG00000004110	ENSSSCG00000004110
chr1:16786885	chr1	16786885	S1_16786885	A	G	A	G	0.58333	0.41667	0.14286	3	0.5	G	0.3333	0.5	A	2	0.360047	0.724187	-0.30414	0.123109	0.74888	-0.990108	0.69706	0.465039	4	0.193569	0.121085	1.8298	11.7592	0.886228	1	A/G/R	0.685968	1.29425	0	2	1	3	Distal Intergenic	1	16904203	16910646	6444	1	ENSSSCT00000069329.1	-117318	ENSSSCG00000048048	ENSSSCG00000048048
chr1:16875139	chr1	16875139	S1_16875139	T	C	T	C	0.78571	0.21429	0	1	0.14286	C	0.1667	0.25	T	2	0.973494	0.452403	0.35679	0.283531	0.6226	-1.82609	1.94167	0.235923	5	0.327391	0.790049	0.347801	11.2502	0.769888	1	C/T/Y	2.18288	1.4693	0	1	5	1	Intron (ENSSSCT00000024450.3/ENSSSCG00000028974.3, intron 8 of 9)	1	16904203	16910646	6444	1	ENSSSCT00000069329.1	-29064	ENSSSCG00000048048	ENSSSCG00000048048
chr1:16912940	chr1	16912940	S1_16912940	A	C	A	C	0.78571	0.21429	0	1	0.14286	C	0.1667	0.25	A	2	0.973494	0.452403	-0.35679	0.283531	0.6226	-1.82609	1.94167	0.235923	5	0.327391	0.790049	0.347801	11.2502	0.769888	1	A/C/M	1.4693	2.18288	0	5	1	1	Intron (ENSSSCT00000024450.3/ENSSSCG00000028974.3, intron 6 of 9)	1	16904203	16910646	6444	1	ENSSSCT00000069329.1	8737	ENSSSCG00000048048	ENSSSCG00000048048
chr1:16912953	chr1	16912953	S1_16912953	T	C	T	C	0.78571	0.21429	0	1	0.14286	C	0.1667	0.25	T	2	0.973494	0.452403	0.35679	0.283531	0.6226	-1.82609	1.94167	0.235923	5	0.327391	0.790049	0.347801	11.2502	0.769888	1	C/T/Y	2.18288	1.4693	0	1	5	1	Intron (ENSSSCT00000024450.3/ENSSSCG00000028974.3, intron 6 of 9)	1	16904203	16910646	6444	1	ENSSSCT00000069329.1	8750	ENSSSCG00000048048	ENSSSCG00000048048
chr1:16926557	chr1	16926557	S1_16926557	T	G	T	G	0.71429	0.28571	0	2	0.28571	G	0.3333	0.25	T	2	1.28739	0.370132	0.257794	0.160281	0.709359	-1.55175	2.51362	0.188048	5	0.391615	0.670609	0.348116	10.8994	0.706414	1	G/T/K	1.80954	1.29395	0	1	4	2	Intron (ENSSSCT00000024450.3/ENSSSCG00000028974.3, intron 6 of 9)	1	16904203	16910646	6444	1	ENSSSCT00000069329.1	22354	ENSSSCG00000048048	ENSSSCG00000048048
chr1:17072707	chr1	17072707	S1_17072707	A	C	A	C	0.71429	0.28571	0	2	0.28571	C	0.1667	0.375	A	2	0.425446	0.67995	-0.643369	0.686311	0.45399	0.0958919	0.00629709	0.940562	5	0.175409	1.06209	0.365009	11.9119	0.867529	1	A/C/M	-0.739261	0.547477	0	4	1	2	Intron (ENSSSCT00000024450.3/ENSSSCG00000028974.3, intron 2 of 9)	1	16840530	17138377	297848	2	ENSSSCT00000024450.3	65670	ENSSSCG00000028974	ENSSSCG00000028974
chr1:17072714	chr1	17072714	S1_17072714	A	G	A	G	0.71429	0.28571	0	2	0.28571	G	0.1667	0.375	A	2	0.425446	0.67995	-0.643369	0.686311	0.45399	0.0958919	0.00629709	0.940562	5	0.175409	1.06209	0.365009	11.9119	0.867529	1	A/G/R	-0.739261	0.547477	0	4	1	2	Intron (ENSSSCT00000024450.3/ENSSSCG00000028974.3, intron 2 of 9)	1	16840530	17138377	297848	2	ENSSSCT00000024450.3	65663	ENSSSCG00000028974	ENSSSCG00000028974
chr1:17081079	chr1	17081079	S1_17081079	T	C	T	C	0.66667	0.33333	0.14286	2	0.33333	C	0.3333	0.3333	T	2	1.45733	0.361233	0.138618	0.0403533	0.853639	-1.66995	2.66079	0.201347	4	0.00051214	1.04466	1.04466e-05	10.2424	0.697034	1	C/T/Y	1.80857	1.53133	0	1	3	2	Intron (ENSSSCT00000024450.3/ENSSSCG00000028974.3, intron 2 of 9)	1	16840530	17138377	297848	2	ENSSSCT00000024450.3	57298	ENSSSCG00000028974	ENSSSCG00000028974
chr1:17275571	chr1	17275571	S1_17275571	G	A	G	A	0.71429	0.28571	0	2	0.28571	A	0.3333	0.25	G	2	20629.4	9.39732e-09	0.424999	41256.9	3.52442e-09	-1.39743	2.57627	0.183747	5	0.999903	0.875613	8.75613e-06	11.4823	8.28921e-08	0.00085214	A/G/R	1.82243	0.972426	0	1	4	2	Distal Intergenic	1	17308172	17402467	94296	2	ENSSSCT00000031199.3	126896	ENSSSCG00000033175	ENSSSCG00000033175
chr1:17296476	chr1	17296476	S1_17296476	A	T	A	T	0.71429	0.28571	0	2	0.28571	T	0.3333	0.25	A	2	18286	1.19599e-08	0.424997	36570.4	4.48551e-09	-0.963649	1.08595	0.356209	5	0.999891	0.987809	9.87809e-06	11.9646	8.89569e-08	0.00108451	A/T/W	1.38865	0.538652	0	4	1	2	Distal Intergenic	1	17308172	17402467	94296	2	ENSSSCT00000031199.3	105991	ENSSSCG00000033175	ENSSSCG00000033175
chr1:17296480	chr1	17296480	S1_17296480	T	C	T	C	0.78571	0.21429	0	1	0.14286	C	0.1667	0.25	T	2	0.973494	0.452403	0.35679	0.283531	0.6226	-1.82609	1.94167	0.235923	5	0.327391	0.790049	0.347801	11.2502	0.769888	1	C/T/Y	2.18288	1.4693	0	1	5	1	Distal Intergenic	1	17308172	17402467	94296	2	ENSSSCT00000031199.3	105987	ENSSSCG00000033175	ENSSSCG00000033175
chr1:17296576	chr1	17296576	S1_17296576	C	T	C	T	0.71429	0.28571	0	2	0.28571	T	0.3333	0.25	C	2	18286	1.19599e-08	0.424997	36570.4	4.48551e-09	-0.963649	1.08595	0.356209	5	0.999891	0.987809	9.87809e-06	11.9646	8.89569e-08	0.00108451	C/T/Y	1.38865	0.538652	0	4	1	2	Distal Intergenic	1	17308172	17402467	94296	2	ENSSSCT00000031199.3	105891	ENSSSCG00000033175	ENSSSCG00000033175
chr1:17401618	chr1	17401618	S1_17401618	C	A	C	A	0.64286	0.35714	0	3	0.42857	A	0.5	0.25	C	2	6.54473	0.0547852	-0.0233287	0.00375562	0.954074	-1.81	11.3038	0.0282493	5	0.765938	4.34728e-06	0.434728	8.01942	0.209314	1	A/C/M	1.78667	1.83333	0	1	3	3	Promoter (<=1kb)	1	17308172	17402467	94296	2	ENSSSCT00000031199.3	849	ENSSSCG00000033175	ENSSSCG00000033175
chr1:17401684	chr1	17401684	S1_17401684	C	T	C	T	0.64286	0.35714	0	3	0.42857	T	0.3333	0.375	C	2	12490.9	2.5629e-08	0.424995	24981.8	9.61145e-09	-0.127384	0.0145157	0.909911	5	0.99984	1.44602	1.44602e-05	13.4843	1.31662e-07	0.00232401	C/T/Y	0.552378	-0.297611	0	3	1	3	Promoter (<=1kb)	1	17308172	17402467	94296	2	ENSSSCT00000031199.3	783	ENSSSCG00000033175	ENSSSCG00000033175
chr1:17401731	chr1	17401731	S1_17401731	G	T	G	T	0.64286	0.35714	0	3	0.42857	T	0.5	0.25	G	2	6.54473	0.0547852	0.0233287	0.00375562	0.954074	-1.81	11.3038	0.0282493	5	0.765938	4.34728e-06	0.434728	8.01942	0.209314	1	G/T/K	1.83333	1.78667	0	3	1	3	Promoter (<=1kb)	1	17308172	17402467	94296	2	ENSSSCT00000031199.3	736	ENSSSCG00000033175	ENSSSCG00000033175
chr1:17410249	chr1	17410249	S1_17410249	C	T	C	T	0.78571	0.21429	0	1	0.14286	T	0.1667	0.25	C	2	0.973494	0.452403	-0.35679	0.283531	0.6226	-1.82609	1.94167	0.235923	5	0.327391	0.790049	0.347801	11.2502	0.769888	1	C/T/Y	1.4693	2.18288	0	5	1	1	Intron (ENSSSCT00000042353.2/ENSSSCG00000033175.2, intron 4 of 19)	1	17308172	17402467	94296	2	ENSSSCT00000031199.3	-7782	ENSSSCG00000033175	ENSSSCG00000033175
chr1:17410292	chr1	17410292	S1_17410292	T	C	T	C	0.64286	0.35714	0	1	0.14286	C	0.1667	0.5	T	2	4.71172	0.0887958	0.754227	5.28667	0.0830051	-1.89939	5.54473	0.0781112	5	0.702014	0.0794798	0.447687	8.74507	0.308172	1	C/T/Y	2.65362	1.14516	0	2	4	1	Intron (ENSSSCT00000042353.2/ENSSSCG00000033175.2, intron 4 of 19)	1	17308172	17402467	94296	2	ENSSSCT00000031199.3	-7825	ENSSSCG00000033175	ENSSSCG00000033175
chr1:17410338	chr1	17410338	S1_17410338	G	A	G	A	0.71429	0.28571	0	2	0.28571	A	0.3333	0.25	G	2	18286	1.19599e-08	-0.424997	36570.4	4.48551e-09	-0.963649	1.08595	0.356209	5	0.999891	0.987809	9.87809e-06	11.9646	8.89569e-08	0.00108451	A/G/R	0.538652	1.38865	0	1	4	2	Intron (ENSSSCT00000042353.2/ENSSSCG00000033175.2, intron 4 of 19)	1	17308172	17402467	94296	2	ENSSSCT00000031199.3	-7871	ENSSSCG00000033175	ENSSSCG00000033175
chr1:17470659	chr1	17470659	S1_17470659	A	C	A	C	0.58333	0.41667	0.14286	1	0.16667	C	0.3333	0.5	A	2	1.03618	0.454849	0.0241645	0.00191689	0.967829	1.91083	2.0666	0.246116	4	0.408559	1.46216e-05	1.46216	10.8698	0.769888	1	A/C/M	-1.88667	-1.935	0	3	2	1	Intron (ENSSSCT00000042353.2/ENSSSCG00000033175.2, intron 1 of 19)	1	17308172	17451426	143255	2	ENSSSCT00000055101.2	-19233	ENSSSCG00000033175	ENSSSCG00000033175
chr1:17470660	chr1	17470660	S1_17470660	G	A	A	G	0.5	0.5	0.14286	2	0.33333	A	0.6667	0.3333	G	2	2.70421	0.213113	-0.784998	2.79449	0.193182	-1.315	2.61395	0.20435	4	0.643215	8.82042e-06	0.882042	9.35351	0.526111	1	A/G/R	0.530004	2.1	0	2	2	2	Intron (ENSSSCT00000042353.2/ENSSSCG00000033175.2, intron 1 of 19)	1	17308172	17451426	143255	2	ENSSSCT00000055101.2	-19234	ENSSSCG00000033175	ENSSSCG00000033175
chr1:17483761	chr1	17483761	S1_17483761	C	T	C	T	0.7	0.3	0.28571	1	0.2	T	0	0.5	C	2	1.79499	0.357783	-0.599999	1.20953	0.386114	1.33	1.48579	0.347128	3	0.642217	8.92893e-06	0.892893	5.4492	0.696766	1	C/T/Y	-1.93	-0.730001	0	3	1	1	Intron (ENSSSCT00000042353.2/ENSSSCG00000033175.2, intron 1 of 19)	1	17306372	17511679	205308	2	ENSSSCT00000042353.2	27918	ENSSSCG00000033175	ENSSSCG00000033175
chr1:17485874	chr1	17485874	S1_17485874	T	C	T	C	0.64286	0.35714	0	1	0.14286	C	0.5	0.25	T	2	16959.4	1.39038e-08	-0.425001	33918.5	5.21425e-09	-0.615919	0.255339	0.639912	5	0.999882	1.06507	1.06507e-05	11.7887	9.56413e-08	0.00126079	C/T/Y	0.190918	1.04092	0	2	4	1	Intron (ENSSSCT00000042353.2/ENSSSCG00000033175.2, intron 1 of 19)	1	17306372	17511679	205308	2	ENSSSCT00000042353.2	25805	ENSSSCG00000033175	ENSSSCG00000033175
chr1:17485880	chr1	17485880	S1_17485880	C	A	C	A	0.64286	0.35714	0	1	0.14286	A	0.5	0.25	C	2	16959.4	1.39038e-08	-0.425001	33918.5	5.21425e-09	-0.615919	0.255339	0.639912	5	0.999882	1.06507	1.06507e-05	11.7887	9.56413e-08	0.00126079	A/C/M	0.190918	1.04092	0	2	4	1	Intron (ENSSSCT00000042353.2/ENSSSCG00000033175.2, intron 1 of 19)	1	17306372	17511679	205308	2	ENSSSCT00000042353.2	25799	ENSSSCG00000033175	ENSSSCG00000033175
chr1:17492070	chr1	17492070	S1_17492070	T	C	T	C	0.71429	0.28571	0	2	0.28571	C	0.3333	0.25	T	2	18286	1.19599e-08	-0.424997	36570.4	4.48551e-09	-0.963649	1.08595	0.356209	5	0.999891	0.987809	9.87809e-06	11.9646	8.89569e-08	0.00108451	C/T/Y	0.538652	1.38865	0	1	4	2	Intron (ENSSSCT00000042353.2/ENSSSCG00000033175.2, intron 1 of 19)	1	17306372	17511679	205308	2	ENSSSCT00000042353.2	19609	ENSSSCG00000033175	ENSSSCG00000033175
chr1:17492078	chr1	17492078	S1_17492078	G	A	G	A	0.64286	0.35714	0	1	0.14286	A	0.1667	0.5	G	2	4.71172	0.0887958	0.754227	5.28667	0.0830051	-1.89939	5.54473	0.0781112	5	0.702014	0.0794798	0.447687	8.74507	0.308172	1	A/G/R	2.65362	1.14516	0	2	4	1	Intron (ENSSSCT00000042353.2/ENSSSCG00000033175.2, intron 1 of 19)	1	17306372	17511679	205308	2	ENSSSCT00000042353.2	19601	ENSSSCG00000033175	ENSSSCG00000033175
chr1:17560903	chr1	17560903	S1_17560903	C	T	C	T	0.58333	0.41667	0.14286	1	0.16667	T	0.3333	0.5	C	2	1.10793	0.436207	-0.010965	0.000541739	0.982892	1.90108	2.17413	0.236797	4	0.215176	0.880927	8.80927e-06	9.52748	0.764351	1	C/T/Y	-1.91205	-1.89012	0	3	2	1	Intron (ENSSSCT00000049782.2/ENSSSCG00000033175.2, intron 1 of 19)	1	17306372	17574278	267907	2	ENSSSCT00000049782.2	13375	ENSSSCG00000033175	ENSSSCG00000033175
chr1:17560930	chr1	17560930	S1_17560930	A	G	A	G	0.58333	0.41667	0.14286	1	0.16667	G	0.3333	0.5	A	2	1.10793	0.436207	-0.010965	0.000541739	0.982892	1.90108	2.17413	0.236797	4	0.215176	0.880927	8.80927e-06	9.52748	0.764351	1	A/G/R	-1.91205	-1.89012	0	3	2	1	Intron (ENSSSCT00000049782.2/ENSSSCG00000033175.2, intron 1 of 19)	1	17306372	17574278	267907	2	ENSSSCT00000049782.2	13348	ENSSSCG00000033175	ENSSSCG00000033175
chr1:17562203	chr1	17562203	S1_17562203	A	G	A	G	0.64286	0.35714	0	3	0.42857	G	0.5	0.25	A	2	6.54473	0.0547852	0.0233287	0.00375562	0.954074	-1.81	11.3038	0.0282493	5	0.765938	4.34728e-06	0.434728	8.01942	0.209314	1	A/G/R	1.83333	1.78667	0	3	1	3	Intron (ENSSSCT00000049782.2/ENSSSCG00000033175.2, intron 1 of 19)	1	17306372	17574278	267907	2	ENSSSCT00000049782.2	12075	ENSSSCG00000033175	ENSSSCG00000033175
chr1:17624237	chr1	17624237	S1_17624237	C	T	C	T	0.78571	0.21429	0	1	0.14286	T	0	0.375	C	2	1.38519	0.349054	-0.0979973	0.0291724	0.872673	1.808	2.29147	0.204646	5	0.409192	1.09732e-05	1.09732	11.723	0.696766	1	C/T/Y	-1.906	-1.71	0	5	1	1	Intron (ENSSSCT00000062342.2/ENSSSCG00000033175.2, intron 1 of 19)	1	17306372	17662825	356454	2	ENSSSCT00000062342.2	38588	ENSSSCG00000033175	ENSSSCG00000033175
chr1:17624274	chr1	17624274	S1_17624274	T	G	T	G	0.71429	0.28571	0	2	0.28571	G	0.1667	0.375	T	2	0.206258	0.821765	0.528365	0.405323	0.558963	-0.398425	0.100463	0.767128	5	0.0934876	1.24968	0.356721	12.3215	0.940348	1	G/T/K	0.926791	-0.12994	0	1	4	2	Intron (ENSSSCT00000062342.2/ENSSSCG00000033175.2, intron 1 of 19)	1	17306372	17662825	356454	2	ENSSSCT00000062342.2	38551	ENSSSCG00000033175	ENSSSCG00000033175
chr1:17633703	chr1	17633703	S1_17633703	A	G	A	G	0.57143	0.42857	0	2	0.28571	G	0.5	0.375	A	2	12698.4	2.47986e-08	-0.424994	25396.6	9.30007e-09	0.339847	0.0854171	0.784619	5	0.999843	1.42241	1.42241e-05	12.924	1.30512e-07	0.00224872	A/G/R	-0.764841	0.0851463	0	3	2	2	Intron (ENSSSCT00000062342.2/ENSSSCG00000033175.2, intron 1 of 19)	1	17306372	17662825	356454	2	ENSSSCT00000062342.2	29122	ENSSSCG00000033175	ENSSSCG00000033175
chr1:17640360	chr1	17640360	S1_17640360	A	T	A	T	0.57143	0.42857	0	2	0.28571	T	0.6667	0.25	A	2	2.44741	0.20223	0.470828	1.27395	0.322136	-1.36083	3.1301	0.151579	5	0.5503	8.35236e-06	0.835236	10.6314	0.526111	1	A/T/W	1.83166	0.890006	0	3	2	2	Intron (ENSSSCT00000062342.2/ENSSSCG00000033175.2, intron 1 of 19)	1	17306372	17662825	356454	2	ENSSSCT00000062342.2	22465	ENSSSCG00000033175	ENSSSCG00000033175
chr1:17745564	chr1	17745564	S1_17745564	C	T	C	T	0.64286	0.35714	0	1	0.14286	T	0.1667	0.5	C	2	4.71172	0.0887958	-0.754227	5.28667	0.0830051	-1.89939	5.54473	0.0781112	5	0.702014	0.0794798	0.447687	8.74507	0.308172	1	C/T/Y	1.14516	2.65362	0	4	2	1	Distal Intergenic	1	17774145	17777771	3627	1	ENSSSCT00000070217.1	-28581	ENSSSCG00000044949	ENSSSCG00000044949
chr1:17745606	chr1	17745606	S1_17745606	T	C	T	C	0.64286	0.35714	0	1	0.14286	C	0.1667	0.5	T	2	4.71172	0.0887958	0.754227	5.28667	0.0830051	-1.89939	5.54473	0.0781112	5	0.702014	0.0794798	0.447687	8.74507	0.308172	1	C/T/Y	2.65362	1.14516	0	2	4	1	Distal Intergenic	1	17774145	17777771	3627	1	ENSSSCT00000070217.1	-28539	ENSSSCG00000044949	ENSSSCG00000044949
chr1:17745651	chr1	17745651	S1_17745651	T	C	T	C	0.64286	0.35714	0	1	0.14286	C	0.1667	0.5	T	2	4.71172	0.0887958	0.754227	5.28667	0.0830051	-1.89939	5.54473	0.0781112	5	0.702014	0.0794798	0.447687	8.74507	0.308172	1	C/T/Y	2.65362	1.14516	0	2	4	1	Distal Intergenic	1	17774145	17777771	3627	1	ENSSSCT00000070217.1	-28494	ENSSSCG00000044949	ENSSSCG00000044949
chr1:17745656	chr1	17745656	S1_17745656	A	T	A	T	0.64286	0.35714	0	1	0.14286	T	0.1667	0.5	A	2	4.71172	0.0887958	-0.754227	5.28667	0.0830051	-1.89939	5.54473	0.0781112	5	0.702014	0.0794798	0.447687	8.74507	0.308172	1	A/T/W	1.14516	2.65362	0	4	2	1	Distal Intergenic	1	17774145	17777771	3627	1	ENSSSCT00000070217.1	-28489	ENSSSCG00000044949	ENSSSCG00000044949
chr1:17857154	chr1	17857154	S1_17857154	T	C	T	C	0.78571	0.21429	0	1	0.14286	C	0.1667	0.25	T	2	0.973494	0.452403	0.35679	0.283531	0.6226	-1.82609	1.94167	0.235923	5	0.327391	0.790049	0.347801	11.2502	0.769888	1	C/T/Y	2.18288	1.4693	0	1	5	1	Distal Intergenic	1	17875419	17878916	3498	1	ENSSSCT00000089685.1	-18265	ENSSSCG00000049293	ENSSSCG00000049293
chr1:17857155	chr1	17857155	S1_17857155	G	A	G	A	0.78571	0.21429	0	1	0.14286	A	0.1667	0.25	G	2	0.973494	0.452403	0.35679	0.283531	0.6226	-1.82609	1.94167	0.235923	5	0.327391	0.790049	0.347801	11.2502	0.769888	1	A/G/R	2.18288	1.4693	0	1	5	1	Distal Intergenic	1	17875419	17878916	3498	1	ENSSSCT00000089685.1	-18264	ENSSSCG00000049293	ENSSSCG00000049293
chr1:17857177	chr1	17857177	S1_17857177	C	A	C	A	0.78571	0.21429	0	1	0.14286	A	0.1667	0.25	C	2	0.973494	0.452403	0.35679	0.283531	0.6226	-1.82609	1.94167	0.235923	5	0.327391	0.790049	0.347801	11.2502	0.769888	1	A/C/M	2.18288	1.4693	0	1	5	1	Distal Intergenic	1	17875419	17878916	3498	1	ENSSSCT00000089685.1	-18242	ENSSSCG00000049293	ENSSSCG00000049293
chr1:17871480	chr1	17871480	S1_17871480	A	G	A	G	0.78571	0.21429	0	1	0.14286	G	0.1667	0.25	A	2	0.973494	0.452403	-0.35679	0.283531	0.6226	-1.82609	1.94167	0.235923	5	0.327391	0.790049	0.347801	11.2502	0.769888	1	A/G/R	1.4693	2.18288	0	5	1	1	Distal Intergenic	1	17875419	17878916	3498	1	ENSSSCT00000089685.1	-3939	ENSSSCG00000049293	ENSSSCG00000049293
chr1:18203680	chr1	18203680	S1_18203680	G	C	C	G	0.5	0.5	0	3	0.42857	C	0.6667	0.375	G	2	2.51623	0.196113	-0.964996	4.52864	0.100427	-0.491668	0.503827	0.517011	5	0.557153	8.22507e-06	0.822507	10.57	0.526111	1	C/G/S	-0.473328	1.45666	0	2	2	3	Distal Intergenic	1	18227005	18230237	3233	2	ENSSSCT00000071743.1	26557	ENSSSCG00000045381	ENSSSCG00000045381
chr1:18211069	chr1	18211069	S1_18211069	C	A	A	C	0.5	0.5	0	3	0.42857	C	0.3333	0.625	A	2	2.2233	0.224262	-0.614473	1.82304	0.248292	-0.669836	1.22573	0.330333	5	0.526436	0.513569	0.277816	10.5861	0.539457	1	A/C/M	0.0553634	1.28431	0	2	2	3	Distal Intergenic	1	18227005	18230237	3233	2	ENSSSCT00000071743.1	19168	ENSSSCG00000045381	ENSSSCG00000045381
chr1:18211099	chr1	18211099	S1_18211099	G	T	G	T	0.5	0.5	0	3	0.42857	G	0.3333	0.625	T	2	2.2233	0.224262	0.614473	1.82304	0.248292	-0.669836	1.22573	0.330333	5	0.526436	0.513569	0.277816	10.5861	0.539457	1	G/T/K	1.28431	0.0553634	0	2	2	3	Distal Intergenic	1	18227005	18230237	3233	2	ENSSSCT00000071743.1	19138	ENSSSCG00000045381	ENSSSCG00000045381
chr1:18793265	chr1	18793265	S1_18793265	A	T	A	T	0.57143	0.42857	0	4	0.57143	T	0.5	0.375	A	2	0.608454	0.587887	-0.181518	0.0500097	0.834003	-1.08308	1.19692	0.335401	5	0.233262	1.00316	0.330349	11.7663	0.823633	1	A/T/W	0.901567	1.2646	0	2	1	4	Distal Intergenic	1	18774274	18780855	6582	2	ENSSSCT00000068394.1	-12410	ENSSSCG00000051595	ENSSSCG00000051595
chr1:18793379	chr1	18793379	S1_18793379	G	A	G	A	0.64286	0.35714	0	3	0.42857	A	0.3333	0.375	G	2	0.199398	0.826899	0.493085	0.336436	0.592998	-0.529194	0.2024	0.676094	5	0.0906602	1.26555	0.351988	12.3172	0.943032	1	A/G/R	1.02228	0.0361088	0	1	3	3	Distal Intergenic	1	18774274	18780855	6582	2	ENSSSCT00000068394.1	-12524	ENSSSCG00000051595	ENSSSCG00000051595
chr1:18793426	chr1	18793426	S1_18793426	G	A	G	A	0.64286	0.35714	0	3	0.42857	A	0.3333	0.375	G	2	0.199398	0.826899	0.493085	0.336436	0.592998	-0.529194	0.2024	0.676094	5	0.0906602	1.26555	0.351988	12.3172	0.943032	1	A/G/R	1.02228	0.0361088	0	1	3	3	Distal Intergenic	1	18774274	18780855	6582	2	ENSSSCT00000068394.1	-12571	ENSSSCG00000051595	ENSSSCG00000051595
chr1:18793427	chr1	18793427	S1_18793427	G	A	G	A	0.64286	0.35714	0	3	0.42857	A	0.3333	0.375	G	2	0.199398	0.826899	0.493085	0.336436	0.592998	-0.529194	0.2024	0.676094	5	0.0906602	1.26555	0.351988	12.3172	0.943032	1	A/G/R	1.02228	0.0361088	0	1	3	3	Distal Intergenic	1	18774274	18780855	6582	2	ENSSSCT00000068394.1	-12572	ENSSSCG00000051595	ENSSSCG00000051595
chr1:18983725	chr1	18983725	S1_18983725	C	G	C	G	0.5	0.5	0.28571	1	0.2	C	0.25	0.6667	G	2	2.34909	0.298589	0.49549	1.54806	0.339461	-1.47556	2.51891	0.253397	3	0.669023	0.587559	5.87559e-06	5.03304	0.632759	1	C/G/S	1.97105	0.980073	0	2	2	1	Intron (ENSSSCT00000087340.1/ENSSSCG00000004114.4, intron 6 of 33)	1	18870885	19029372	158488	2	ENSSSCT00000004553.4	45647	ENSSSCG00000004114	ENSSSCG00000004114
chr1:18983730	chr1	18983730	S1_18983730	C	G	C	G	0.5	0.5	0.28571	1	0.2	C	0.25	0.6667	G	2	2.34909	0.298589	0.49549	1.54806	0.339461	-1.47556	2.51891	0.253397	3	0.669023	0.587559	5.87559e-06	5.03304	0.632759	1	C/G/S	1.97105	0.980073	0	2	2	1	Intron (ENSSSCT00000087340.1/ENSSSCG00000004114.4, intron 6 of 33)	1	18870885	19029372	158488	2	ENSSSCT00000004553.4	45642	ENSSSCG00000004114	ENSSSCG00000004114
chr1:19177308	chr1	19177308	S1_19177308	T	C	T	C	0.78571	0.21429	0	1	0.14286	C	0.1667	0.25	T	2	18593.3	1.15679e-08	0.425001	37185.5	4.33837e-09	-1.42812	1.47888	0.290806	5	0.999892	0.971489	9.71489e-06	11.8733	8.89569e-08	0.00104897	C/T/Y	1.85312	1.00312	0	1	5	1	Intron (ENSSSCT00000063403.2/ENSSSCG00000004119.4, intron 10 of 10)	1	18870890	19097892	227003	2	ENSSSCT00000004549.4	-79416	ENSSSCG00000004114	ENSSSCG00000004114
chr1:19337898	chr1	19337898	S1_19337898	T	C	T	C	0.64286	0.35714	0	1	0.14286	C	0.5	0.25	T	2	0.813398	0.505356	-0.14126	0.0711365	0.802875	-1.54819	1.44315	0.295895	5	0.289116	0.865212	0.346546	11.5196	0.781202	1	C/T/Y	1.40693	1.68945	0	2	4	1	Intron (ENSSSCT00000063403.2/ENSSSCG00000004119.4, intron 3 of 10)	1	19438971	19444520	5550	2	ENSSSCT00000072948.1	106622	ENSSSCG00000043624	ENSSSCG00000043624
chr1:19550497	chr1	19550497	S1_19550497	T	C	T	C	0.71429	0.28571	0	2	0.28571	C	0.5	0.125	T	2	19001.2	1.10766e-08	-0.510083	0.784831	0.425715	-0.339924	0.348531	0.586686	5	0.999895	0.950632	9.50632e-06	11.334	8.89569e-08	0.00100441	C/T/Y	-0.170159	0.850006	0	1	4	2	Intron (ENSSSCT00000063403.2/ENSSSCG00000004119.4, intron 2 of 10)	1	19173791	19570917	397127	2	ENSSSCT00000063403.2	20420	ENSSSCG00000004119	ENSSSCG00000004119
chr1:19550502	chr1	19550502	S1_19550502	T	C	T	C	0.71429	0.28571	0	2	0.28571	C	0.5	0.125	T	2	19001.2	1.10766e-08	-0.510083	0.784831	0.425715	-0.339924	0.348531	0.586686	5	0.999895	0.950632	9.50632e-06	11.334	8.89569e-08	0.00100441	C/T/Y	-0.170159	0.850006	0	1	4	2	Intron (ENSSSCT00000063403.2/ENSSSCG00000004119.4, intron 2 of 10)	1	19173791	19570917	397127	2	ENSSSCT00000063403.2	20415	ENSSSCG00000004119	ENSSSCG00000004119
chr1:19755730	chr1	19755730	S1_19755730	G	A	G	A	0.7	0.3	0.28571	1	0.2	A	0	0.5	G	2	1.79499	0.357783	0.599999	1.20953	0.386114	1.33	1.48579	0.347128	3	0.642217	8.92893e-06	0.892893	5.4492	0.696766	1	A/G/R	-0.730001	-1.93	0	1	3	1	Promoter (<=1kb)	1	19755720	19777618	21899	1	ENSSSCT00000004556.4	10	ENSSSCG00000004121	ENSSSCG00000004121
chr1:19755760	chr1	19755760	S1_19755760	G	A	G	A	0.7	0.3	0.28571	1	0.2	A	0	0.5	G	2	1.79499	0.357783	0.599999	1.20953	0.386114	1.33	1.48579	0.347128	3	0.642217	8.92893e-06	0.892893	5.4492	0.696766	1	A/G/R	-0.730001	-1.93	0	1	3	1	Promoter (<=1kb)	1	19755720	19777618	21899	1	ENSSSCT00000004556.4	40	ENSSSCG00000004121	ENSSSCG00000004121
chr1:19755762	chr1	19755762	S1_19755762	A	G	A	G	0.7	0.3	0.28571	1	0.2	G	0	0.5	A	2	1.79499	0.357783	-0.599999	1.20953	0.386114	1.33	1.48579	0.347128	3	0.642217	8.92893e-06	0.892893	5.4492	0.696766	1	A/G/R	-1.93	-0.730001	0	3	1	1	Promoter (<=1kb)	1	19755720	19777618	21899	1	ENSSSCT00000004556.4	42	ENSSSCG00000004121	ENSSSCG00000004121
chr1:19755804	chr1	19755804	S1_19755804	T	C	T	C	0.7	0.3	0.28571	1	0.2	C	0	0.5	T	2	1.79499	0.357783	0.599999	1.20953	0.386114	1.33	1.48579	0.347128	3	0.642217	8.92893e-06	0.892893	5.4492	0.696766	1	C/T/Y	-0.730001	-1.93	0	1	3	1	Promoter (<=1kb)	1	19755720	19777618	21899	1	ENSSSCT00000004556.4	84	ENSSSCG00000004121	ENSSSCG00000004121
chr1:20075945	chr1	20075945	S1_20075945	A	G	A	G	0.66667	0.33333	0.14286	2	0.33333	G	0.5	0.1667	A	2	0.927132	0.485844	0.926017	1.84928	0.267043	0.586469	0.236234	0.66023	4	0.000396988	1.27286	1.27286e-05	10.9275	0.781202	1	A/G/R	0.339548	-1.51249	0	3	1	2	Distal Intergenic	1	19806742	19892773	86032	1	ENSSSCT00000082584.1	269203	ENSSSCG00000004121	ENSSSCG00000004121
chr1:20845052	chr1	20845052	S1_20845052	G	A	A	G	0.66667	0.33333	0.14286	2	0.33333	G	0.3333	0.3333	A	2	1.14567	0.426907	0.113386	0.027551	0.878725	1.3961	2.14208	0.239509	4	0.000450042	1.16772	1.16772e-05	10.9197	0.757801	1	A/G/R	-1.28271	-1.50948	0	3	1	2	Intron (ENSSSCT00000061166.2/ENSSSCG00000004123.4, intron 28 of 74)	1	20514258	20752193	237936	2	ENSSSCT00000004558.4	-92859	ENSSSCG00000004123	ENSSSCG00000004123
chr1:20845053	chr1	20845053	S1_20845053	G	A	A	G	0.66667	0.33333	0.14286	2	0.33333	G	0.3333	0.3333	A	2	1.14567	0.426907	0.113386	0.027551	0.878725	1.3961	2.14208	0.239509	4	0.000450042	1.16772	1.16772e-05	10.9197	0.757801	1	A/G/R	-1.28271	-1.50948	0	3	1	2	Intron (ENSSSCT00000061166.2/ENSSSCG00000004123.4, intron 28 of 74)	1	20514258	20752193	237936	2	ENSSSCT00000004558.4	-92860	ENSSSCG00000004123	ENSSSCG00000004123
chr1:21684083	chr1	21684083	S1_21684083	G	A	A	G	0.5	0.5	0	3	0.42857	A	0.6667	0.375	G	2	0.135081	0.877468	-0.131481	0.0410256	0.849374	-0.462845	0.222144	0.661968	5	0.0632672	0.215063	1.45273	13.4622	0.971372	1	A/G/R	0.331364	0.594326	0	2	2	3	Intron (ENSSSCT00000041834.2/ENSSSCG00000004132.4, intron 1 of 10)	1	21706554	21706659	106	2	ENSSSCT00000021803.3	22576	ENSSSCG00000020208	ENSSSCG00000020208
chr1:21693517	chr1	21693517	S1_21693517	G	A	G	A	0.7	0.3	0.28571	1	0.2	A	0.25	0.3333	G	2	0.915836	0.521965	0.649665	0.873721	0.448603	-1.61691	1.54832	0.33943	3	0.473457	0.868868	0.183208	5.89758	0.789352	1	A/G/R	2.26658	0.967249	0	1	3	1	Intron (ENSSSCT00000041834.2/ENSSSCG00000004132.4, intron 1 of 10)	1	21706554	21706659	106	2	ENSSSCT00000021803.3	13142	ENSSSCG00000020208	ENSSSCG00000020208
chr1:21851691	chr1	21851691	S1_21851691	C	T	C	T	0.64286	0.35714	0	3	0.42857	T	0.6667	0.125	C	2	1.6025	0.308214	0.733331	1.5646	0.279164	-0.626659	0.571264	0.491825	5	0.44483	1.03113e-05	1.03113	11.4742	0.647602	1	C/T/Y	1.35999	-0.106671	0	3	1	3	Intron (ENSSSCT00000078396.1/ENSSSCG00000048780.1, intron 1 of 2)	1	21868172	21871040	2869	1	ENSSSCT00000085171.1	-16481	ENSSSCG00000048780	ENSSSCG00000048780
chr1:22168886	chr1	22168886	S1_22168886	C	T	C	T	0.64286	0.35714	0	3	0.42857	T	0.6667	0.125	C	2	1.6025	0.308214	0.733331	1.5646	0.279164	-0.626659	0.571264	0.491825	5	0.44483	1.03113e-05	1.03113	11.4742	0.647602	1	C/T/Y	1.35999	-0.106671	0	3	1	3	Distal Intergenic	1	22055248	22165083	109836	2	ENSSSCT00000087153.1	-3803	ENSSSCG00000004136	ENSSSCG00000004136
chr1:22313491	chr1	22313491	S1_22313491	G	A	G	A	0.64286	0.35714	0	1	0.14286	A	0.5	0.25	G	2	0.286513	0.76509	-0.338407	0.308847	0.608006	-0.618559	0.180455	0.692837	5	0.125306	1.19169	0.351312	12.295	0.911583	1	A/G/R	0.280152	0.956966	0	2	4	1	Intron (ENSSSCT00000056296.2/ENSSSCG00000004138.4, intron 3 of 11)	1	22330795	22339452	8658	1	ENSSSCT00000087091.1	-17304	ENSSSCG00000044542	ENSSSCG00000044542
chr1:22313510	chr1	22313510	S1_22313510	T	G	T	G	0.64286	0.35714	0	1	0.14286	G	0.5	0.25	T	2	0.286513	0.76509	-0.338407	0.308847	0.608006	-0.618559	0.180455	0.692837	5	0.125306	1.19169	0.351312	12.295	0.911583	1	G/T/K	0.280152	0.956966	0	2	4	1	Intron (ENSSSCT00000056296.2/ENSSSCG00000004138.4, intron 3 of 11)	1	22330795	22339452	8658	1	ENSSSCT00000087091.1	-17285	ENSSSCG00000044542	ENSSSCG00000044542
chr1:22313555	chr1	22313555	S1_22313555	A	G	A	G	0.64286	0.35714	0	1	0.14286	G	0.5	0.25	A	2	0.286513	0.76509	0.338407	0.308847	0.608006	-0.618559	0.180455	0.692837	5	0.125306	1.19169	0.351312	12.295	0.911583	1	A/G/R	0.956966	0.280152	0	4	2	1	Intron (ENSSSCT00000056296.2/ENSSSCG00000004138.4, intron 3 of 11)	1	22330795	22339452	8658	1	ENSSSCT00000087091.1	-17240	ENSSSCG00000044542	ENSSSCG00000044542
chr1:22332344	chr1	22332344	S1_22332344	G	A	G	A	0.7	0.3	0.28571	1	0.2	A	0.25	0.3333	G	2	0.362616	0.733883	0.133304	0.0269888	0.884611	-1.28454	0.710666	0.487971	3	0.253829	1.44412	1.44412e-05	6.6025	0.896846	1	A/G/R	1.41785	1.15124	0	1	3	1	Promoter (1-2kb)	1	22330795	22339452	8658	1	ENSSSCT00000087091.1	1549	ENSSSCG00000044542	ENSSSCG00000044542
chr1:23293978	chr1	23293978	S1_23293978	G	A	A	G	0.5	0.5	0	1	0.14286	G	0.5	0.5	A	2	15230.4	1.72395e-08	-0.424997	30460.4	6.46525e-09	-0.728218	0.320552	0.60153	5	0.999869	1.18597	1.18597e-05	12.101	1.01169e-07	0.00156326	A/G/R	0.303221	1.15322	0	3	3	1	Distal Intergenic	1	23373540	23380093	6554	1	ENSSSCT00000077898.1	-79562	ENSSSCG00000049679	ENSSSCG00000049679
chr1:23293986	chr1	23293986	S1_23293986	A	G	A	G	0.5	0.5	0	1	0.14286	A	0.5	0.5	G	2	15230.4	1.72395e-08	0.424997	30460.4	6.46525e-09	-0.728218	0.320552	0.60153	5	0.999869	1.18597	1.18597e-05	12.101	1.01169e-07	0.00156326	A/G/R	1.15322	0.303221	0	3	3	1	Distal Intergenic	1	23373540	23380093	6554	1	ENSSSCT00000077898.1	-79554	ENSSSCG00000049679	ENSSSCG00000049679
chr1:23294008	chr1	23294008	S1_23294008	C	A	A	C	0.5	0.5	0	1	0.14286	C	0.5	0.5	A	2	15230.4	1.72395e-08	-0.424997	30460.4	6.46525e-09	-0.728218	0.320552	0.60153	5	0.999869	1.18597	1.18597e-05	12.101	1.01169e-07	0.00156326	A/C/M	0.303221	1.15322	0	3	3	1	Distal Intergenic	1	23373540	23380093	6554	1	ENSSSCT00000077898.1	-79532	ENSSSCG00000049679	ENSSSCG00000049679
chr1:23337557	chr1	23337557	S1_23337557	A	G	A	G	0.7	0.3	0.28571	1	0.2	G	0.25	0.3333	A	2	1.42905	0.411684	-0.82693	2.13347	0.281568	-1.39301	1.76949	0.314854	3	0.570774	0.661186	6.61186e-06	4.97874	0.740961	1	A/G/R	0.566084	2.21994	0	3	1	1	Distal Intergenic	1	23373540	23380093	6554	1	ENSSSCT00000077898.1	-35983	ENSSSCG00000049679	ENSSSCG00000049679
chr1:23458192	chr1	23458192	S1_23458192	T	G	G	T	0.5	0.5	0	1	0.14286	T	0.5	0.5	G	2	15230.4	1.72395e-08	-0.424997	30460.4	6.46525e-09	-0.728218	0.320552	0.60153	5	0.999869	1.18597	1.18597e-05	12.101	1.01169e-07	0.00156326	G/T/K	0.303221	1.15322	0	3	3	1	Distal Intergenic	1	23373540	23380093	6554	1	ENSSSCT00000077898.1	84652	ENSSSCG00000049679	ENSSSCG00000049679
chr1:23458198	chr1	23458198	S1_23458198	A	G	A	G	0.5	0.5	0	1	0.14286	A	0.5	0.5	G	2	15230.4	1.72395e-08	0.424997	30460.4	6.46525e-09	-0.728218	0.320552	0.60153	5	0.999869	1.18597	1.18597e-05	12.101	1.01169e-07	0.00156326	A/G/R	1.15322	0.303221	0	3	3	1	Distal Intergenic	1	23373540	23380093	6554	1	ENSSSCT00000077898.1	84658	ENSSSCG00000049679	ENSSSCG00000049679
chr1:23545709	chr1	23545709	S1_23545709	T	A	T	A	0.57143	0.42857	0	2	0.28571	A	0.3333	0.5	T	2	1.73286	0.287063	-0.284104	0.961997	0.382217	-1.35238	2.36325	0.199039	5	0.464218	0.747127	0.206688	11.4404	0.618685	1	A/T/W	1.06827	1.63648	0	2	3	2	Distal Intergenic	1	23373540	23380093	6554	1	ENSSSCT00000077898.1	172169	ENSSSCG00000049679	ENSSSCG00000049679
chr1:23545857	chr1	23545857	S1_23545857	G	C	G	C	0.57143	0.42857	0	2	0.28571	C	0.5	0.375	G	2	15024.2	1.77157e-08	-0.439124	0.675011	0.457458	-0.410872	0.590922	0.484936	5	0.999867	1.20224	1.20224e-05	12.2515	1.02009e-07	0.00160645	C/G/S	-0.0282516	0.849996	0	2	3	2	Distal Intergenic	1	23373540	23380093	6554	1	ENSSSCT00000077898.1	172317	ENSSSCG00000049679	ENSSSCG00000049679
chr1:23546130	chr1	23546130	S1_23546130	A	C	A	C	0.5	0.5	0	1	0.14286	A	0.5	0.5	C	2	15230.4	1.72395e-08	0.424997	30460.4	6.46525e-09	-0.728218	0.320552	0.60153	5	0.999869	1.18597	1.18597e-05	12.101	1.01169e-07	0.00156326	A/C/M	1.15322	0.303221	0	3	3	1	Distal Intergenic	1	23373540	23380093	6554	1	ENSSSCT00000077898.1	172590	ENSSSCG00000049679	ENSSSCG00000049679
chr1:23561967	chr1	23561967	S1_23561967	C	G	C	G	0.75	0.25	0.14286	1	0.16667	G	0.5	0	C	2	2.94583	0.195978	0.995266	3.96549	0.140499	-0.639207	0.363423	0.589135	4	0.000688628	0.694898	6.94898e-06	9.13556	0.526111	1	C/G/S	1.63447	-0.356059	0	4	1	1	Distal Intergenic	1	23373540	23380093	6554	1	ENSSSCT00000077898.1	188427	ENSSSCG00000049679	ENSSSCG00000049679
chr1:23561977	chr1	23561977	S1_23561977	G	A	G	A	0.75	0.25	0.14286	1	0.16667	A	0.5	0	G	2	2.94583	0.195978	-0.995266	3.96549	0.140499	-0.639207	0.363423	0.589135	4	0.000688628	0.694898	6.94898e-06	9.13556	0.526111	1	A/G/R	-0.356059	1.63447	0	1	4	1	Distal Intergenic	1	23373540	23380093	6554	1	ENSSSCT00000077898.1	188437	ENSSSCG00000049679	ENSSSCG00000049679
chr1:23562030	chr1	23562030	S1_23562030	T	G	T	G	0.75	0.25	0.14286	1	0.16667	G	0.5	0	T	2	2.94583	0.195978	-0.995266	3.96549	0.140499	-0.639207	0.363423	0.589135	4	0.000688628	0.694898	6.94898e-06	9.13556	0.526111	1	G/T/K	-0.356059	1.63447	0	1	4	1	Distal Intergenic	1	23373540	23380093	6554	1	ENSSSCT00000077898.1	188490	ENSSSCG00000049679	ENSSSCG00000049679
chr1:23562110	chr1	23562110	S1_23562110	G	A	A	G	0.5	0.5	0.14286	2	0.33333	G	1	0.25	A	2	88101.3	7.02509e-08	0.560551	6.71268	0.081012	1.41055	42.5034	0.00733199	4	0.999983	0.205035	2.05035e-06	5.23845	3.52944e-07	0.00637028	A/G/R	-0.849999	-1.9711	0	2	2	2	Distal Intergenic	1	23373540	23380093	6554	1	ENSSSCT00000077898.1	188570	ENSSSCG00000049679	ENSSSCG00000049679
chr1:23562124	chr1	23562124	S1_23562124	T	A	A	T	0.5	0.5	0.14286	2	0.33333	T	1	0.25	A	2	88101.3	7.02509e-08	0.560551	6.71268	0.081012	1.41055	42.5034	0.00733199	4	0.999983	0.205035	2.05035e-06	5.23845	3.52944e-07	0.00637028	A/T/W	-0.849999	-1.9711	0	2	2	2	Distal Intergenic	1	23373540	23380093	6554	1	ENSSSCT00000077898.1	188584	ENSSSCG00000049679	ENSSSCG00000049679
chr1:23562125	chr1	23562125	S1_23562125	G	T	G	T	0.5	0.5	0.14286	2	0.33333	G	1	0.25	T	2	88101.3	7.02509e-08	-0.560551	6.71268	0.081012	1.41055	42.5034	0.00733199	4	0.999983	0.205035	2.05035e-06	5.23845	3.52944e-07	0.00637028	G/T/K	-1.9711	-0.849999	0	2	2	2	Distal Intergenic	1	23373540	23380093	6554	1	ENSSSCT00000077898.1	188585	ENSSSCG00000049679	ENSSSCG00000049679
chr1:23961693	chr1	23961693	S1_23961693	A	G	A	G	0.57143	0.42857	0	4	0.57143	G	0.3333	0.5	A	2	0.425446	0.67995	-0.273739	0.109362	0.757469	-1.013	0.84526	0.409922	5	0.175409	1.06209	0.365009	11.9119	0.867529	1	A/G/R	0.739261	1.28674	0	2	1	4	Distal Intergenic	1	24052091	24054400	2310	1	ENSSSCT00000068697.1	-90398	ENSSSCG00000043068	ENSSSCG00000043068
chr1:23961703	chr1	23961703	S1_23961703	C	T	C	T	0.71429	0.28571	0	2	0.28571	T	0.1667	0.375	C	2	13351.1	2.24335e-08	-0.612303	0.660443	0.462003	0.237682	0.0995129	0.768188	5	0.99985	1.35288	1.35288e-05	12.5605	1.22001e-07	0.00203424	C/T/Y	-0.849984	0.374621	0	4	1	2	Distal Intergenic	1	24052091	24054400	2310	1	ENSSSCT00000068697.1	-90388	ENSSSCG00000043068	ENSSSCG00000043068
chr1:23961731	chr1	23961731	S1_23961731	G	A	G	A	0.71429	0.28571	0	2	0.28571	A	0.1667	0.375	G	2	13351.1	2.24335e-08	0.612303	0.660443	0.462003	0.237682	0.0995129	0.768188	5	0.99985	1.35288	1.35288e-05	12.5605	1.22001e-07	0.00203424	A/G/R	0.374621	-0.849984	0	1	4	2	Distal Intergenic	1	24052091	24054400	2310	1	ENSSSCT00000068697.1	-90360	ENSSSCG00000043068	ENSSSCG00000043068
chr1:24120095	chr1	24120095	S1_24120095	T	C	C	T	0.64286	0.35714	0	3	0.42857	T	0.3333	0.375	C	2	1.02319	0.437652	-0.968862	2.03911	0.226485	-0.728125	0.72016	0.443892	5	0.338447	0.598904	0.496181	11.6941	0.764351	1	C/T/Y	-0.240738	1.69699	0	3	1	3	Distal Intergenic	1	24130799	24135450	4652	2	ENSSSCT00000069842.1	15355	ENSSSCG00000043584	ENSSSCG00000043584
chr1:24235183	chr1	24235183	S1_24235183	C	T	T	C	0.58333	0.41667	0.14286	3	0.5	C	0.5	0.375	T	2	1.89495	0.293688	0.610003	1.31368	0.334865	-1.31999	3.25661	0.168899	4	0.558168	7.55329e-06	0.755329	8.88825	0.631388	1	C/T/Y	1.93	0.709991	0	1	2	3	Distal Intergenic	1	24317706	24323037	5332	2	ENSSSCT00000072922.1	87854	ENSSSCG00000047685	ENSSSCG00000047685
chr1:25282740	chr1	25282740	S1_25282740	T	C	C	T	0.64286	0.35714	0	1	0.14286	T	0.5	0.25	C	2	0.120638	0.889461	0.00106194	2.74846e-06	0.998757	-0.739066	0.23596	0.652548	5	0.0568875	1.32318	0.360003	12.5804	0.975726	1	C/T/Y	0.740128	0.738004	0	4	2	1	Exon (ENSSSCT00000064833.2/ENSSSCG00000004143.4, exon 10 of 10)	1	25228661	25285303	56643	1	ENSSSCT00000004578.4	54079	ENSSSCG00000004143	ENSSSCG00000004143
chr1:25282785	chr1	25282785	S1_25282785	T	A	A	T	0.5	0.5	0	3	0.42857	T	0.6667	0.375	A	2	19712.2	1.0292e-08	0.194296	0.172311	0.699365	-0.655716	1.96246	0.233858	5	0.999899	0.916347	9.16347e-06	11.1591	8.79033e-08	0.000933269	A/T/W	0.850013	0.46142	0	2	2	3	Exon (ENSSSCT00000064833.2/ENSSSCG00000004143.4, exon 10 of 10)	1	25228661	25285303	56643	1	ENSSSCT00000004578.4	54124	ENSSSCG00000004143	ENSSSCG00000004143
chr1:25382038	chr1	25382038	S1_25382038	G	A	G	A	0.64286	0.35714	0	1	0.14286	A	0.1667	0.5	G	2	25922.2	5.9518e-09	0.425001	51841.9	2.2322e-09	-1.6726	2.8389	0.16729	5	0.999923	0.696841	6.96841e-06	10.0781	6.20919e-08	0.000539703	A/G/R	2.0976	1.2476	0	2	4	1	Promoter (<=1kb)	1	25381531	25392255	10725	1	ENSSSCT00000085822.1	507	ENSSSCG00000050336	ENSSSCG00000050336
chr1:25680505	chr1	25680505	S1_25680505	C	G	C	G	0.7	0.3	0.28571	1	0.2	G	0.75	0	C	2	10.8412	0.0844509	0.810776	10.5447	0.0831739	-1.16981	5.25652	0.148891	3	0.873274	0.166181	1.66181e-06	2.46577	0.296073	1	C/G/S	1.98059	0.359038	0	3	1	1	Distal Intergenic	1	25695858	25700915	5058	1	ENSSSCT00000079695.1	-15353	ENSSSCG00000042590	ENSSSCG00000042590
chr1:25697476	chr1	25697476	S1_25697476	A	C	A	C	0.7	0.3	0.28571	1	0.2	C	0.5	0	A	2	0.559585	0.641196	0.69396	1.02061	0.418724	-0.00150552	1.16777e-06	0.999236	3	0.353958	1.23228	1.23228e-05	6.28522	0.863194	1	A/C/M	0.695466	-0.692455	0	3	1	1	Promoter (1-2kb)	1	25695858	25700915	5058	1	ENSSSCT00000079695.1	1618	ENSSSCG00000042590	ENSSSCG00000042590
chr1:25980108	chr1	25980108	S1_25980108	G	A	G	A	0.64286	0.35714	0	1	0.14286	A	0.5	0.25	G	2	19001.2	1.10766e-08	-0.425003	38002.1	4.15394e-09	-0.595162	0.26712	0.632533	5	0.999895	0.950632	9.50632e-06	11.334	8.89569e-08	0.00100441	A/G/R	0.170159	1.02017	0	2	4	1	Exon (ENSSSCT00000063827.2/ENSSSCG00000004149.4, exon 6 of 8)	1	25991388	25991508	121	1	ENSSSCT00000021979.2	-11280	ENSSSCG00000020384	ENSSSCG00000020384
chr1:25980117	chr1	25980117	S1_25980117	A	G	A	G	0.64286	0.35714	0	1	0.14286	G	0.5	0.25	A	2	19001.2	1.10766e-08	0.425003	38002.1	4.15394e-09	-0.595162	0.26712	0.632533	5	0.999895	0.950632	9.50632e-06	11.334	8.89569e-08	0.00100441	A/G/R	1.02017	0.170159	0	4	2	1	Exon (ENSSSCT00000063827.2/ENSSSCG00000004149.4, exon 6 of 8)	1	25991388	25991508	121	1	ENSSSCT00000021979.2	-11271	ENSSSCG00000020384	ENSSSCG00000020384
chr1:25997163	chr1	25997163	S1_25997163	A	G	G	A	0.64286	0.35714	0	1	0.14286	A	0.5	0.25	G	2	0.120638	0.889461	-0.00106194	2.74846e-06	0.998757	-0.739066	0.23596	0.652548	5	0.0568875	1.32318	0.360003	12.5804	0.975726	1	A/G/R	0.738004	0.740128	0	2	4	1	Distal Intergenic	1	25991388	25991508	121	1	ENSSSCT00000021979.2	5775	ENSSSCG00000020384	ENSSSCG00000020384
chr1:25997175	chr1	25997175	S1_25997175	A	T	A	T	0.5	0.5	0	3	0.42857	A	0.6667	0.375	T	2	19712.2	1.0292e-08	-0.194296	0.172311	0.699365	-0.655716	1.96246	0.233858	5	0.999899	0.916347	9.16347e-06	11.1591	8.79033e-08	0.000933269	A/T/W	0.46142	0.850013	0	2	2	3	Distal Intergenic	1	25991388	25991508	121	1	ENSSSCT00000021979.2	5787	ENSSSCG00000020384	ENSSSCG00000020384
chr1:25997213	chr1	25997213	S1_25997213	A	G	G	A	0.64286	0.35714	0	1	0.14286	A	0.5	0.25	G	2	0.120638	0.889461	-0.00106194	2.74846e-06	0.998757	-0.739066	0.23596	0.652548	5	0.0568875	1.32318	0.360003	12.5804	0.975726	1	A/G/R	0.738004	0.740128	0	2	4	1	Distal Intergenic	1	25991388	25991508	121	1	ENSSSCT00000021979.2	5825	ENSSSCG00000020384	ENSSSCG00000020384
chr1:25997446	chr1	25997446	S1_25997446	C	T	T	C	0.625	0.375	0.42857	1	0.25	C	0.5	0.3333	T	2	132.133	0.0613988	0.406683	41.2913	0.0982837	-1.86554	262.972	0.0392081	2	0.996222	0.0078589	7.8589e-08	Inf	0.229723	1	C/T/Y	2.27222	1.45886	0	1	2	1	Distal Intergenic	1	25991388	25991508	121	1	ENSSSCT00000021979.2	6058	ENSSSCG00000020384	ENSSSCG00000020384
chr1:25997481	chr1	25997481	S1_25997481	A	G	G	A	0.625	0.375	0.42857	1	0.25	A	0.5	0.3333	G	2	132.133	0.0613988	0.406683	41.2913	0.0982837	-1.86554	262.972	0.0392081	2	0.996222	0.0078589	7.8589e-08	Inf	0.229723	1	A/G/R	2.27222	1.45886	0	1	2	1	Distal Intergenic	1	25991388	25991508	121	1	ENSSSCT00000021979.2	6093	ENSSSCG00000020384	ENSSSCG00000020384
chr1:26035765	chr1	26035765	S1_26035765	C	T	C	T	0.7	0.3	0.28571	1	0.2	T	0.5	0	C	2	0.559585	0.641196	0.347733	0.261913	0.659717	-1.04019	0.548814	0.535973	3	0.353958	1.23228	1.23228e-05	6.28522	0.863194	1	C/T/Y	1.38792	0.692455	0	3	1	1	Promoter (1-2kb)	1	26037662	26037765	104	1	ENSSSCT00000046807.1	-1897	ENSSSCG00000037315	ENSSSCG00000037315
chr1:26035791	chr1	26035791	S1_26035791	G	A	G	A	0.7	0.3	0.28571	1	0.2	A	0.5	0	G	2	0.559585	0.641196	-0.347733	0.261913	0.659717	-1.04019	0.548814	0.535973	3	0.353958	1.23228	1.23228e-05	6.28522	0.863194	1	A/G/R	0.692455	1.38792	0	1	3	1	Promoter (1-2kb)	1	26037662	26037765	104	1	ENSSSCT00000046807.1	-1871	ENSSSCG00000037315	ENSSSCG00000037315
chr1:26128715	chr1	26128715	S1_26128715	T	C	T	C	0.66667	0.33333	0.14286	2	0.33333	C	0.6667	0	T	2	5.10053	0.108335	-1.09833	7.04579	0.0767054	-0.553332	0.71531	0.459809	4	0.772745	5.13633e-06	0.513633	7.73132	0.367682	1	C/T/Y	-0.544999	1.65166	0	1	3	2	Intron (ENSSSCT00000023062.3/ENSSSCG00000022968.3, intron 16 of 32)	1	26091113	26095557	4445	1	ENSSSCT00000086855.1	37602	ENSSSCG00000046952	ENSSSCG00000046952
chr1:26128736	chr1	26128736	S1_26128736	A	G	A	G	0.66667	0.33333	0.14286	2	0.33333	G	0.6667	0	A	2	5.10053	0.108335	1.09833	7.04579	0.0767054	-0.553332	0.71531	0.459809	4	0.772745	5.13633e-06	0.513633	7.73132	0.367682	1	A/G/R	1.65166	-0.544999	0	3	1	2	Intron (ENSSSCT00000023062.3/ENSSSCG00000022968.3, intron 16 of 32)	1	26091113	26095557	4445	1	ENSSSCT00000086855.1	37623	ENSSSCG00000046952	ENSSSCG00000046952
chr1:26128784	chr1	26128784	S1_26128784	A	G	A	G	0.71429	0.28571	0	2	0.28571	G	0.6667	0	A	2	7.1369	0.047914	1.07019	9.21572	0.0385628	-0.5406	0.89547	0.397582	5	0.781107	0.0842169	0.295675	7.47308	0.197401	1	A/G/R	1.61079	-0.529593	0	4	1	2	Intron (ENSSSCT00000023062.3/ENSSSCG00000022968.3, intron 16 of 32)	1	26091113	26095557	4445	1	ENSSSCT00000086855.1	37671	ENSSSCG00000046952	ENSSSCG00000046952
chr1:26128796	chr1	26128796	S1_26128796	C	A	C	A	0.71429	0.28571	0	2	0.28571	A	0.6667	0	C	2	7.1369	0.047914	-1.07019	9.21572	0.0385628	-0.5406	0.89547	0.397582	5	0.781107	0.0842169	0.295675	7.47308	0.197401	1	A/C/M	-0.529593	1.61079	0	1	4	2	Intron (ENSSSCT00000023062.3/ENSSSCG00000022968.3, intron 16 of 32)	1	26091113	26095557	4445	1	ENSSSCT00000086855.1	37683	ENSSSCG00000046952	ENSSSCG00000046952
chr1:26128824	chr1	26128824	S1_26128824	A	G	A	G	0.5	0.5	0	3	0.42857	A	0.3333	0.625	G	2	0.540569	0.619724	0.539993	0.797715	0.422256	-0.491667	0.283423	0.622665	5	0.212775	1.46213e-05	1.46213	12.8711	0.842568	1	A/G/R	1.03166	-0.0483254	0	2	2	3	Intron (ENSSSCT00000023062.3/ENSSSCG00000022968.3, intron 16 of 32)	1	26091113	26095557	4445	1	ENSSSCT00000086855.1	37711	ENSSSCG00000046952	ENSSSCG00000046952
chr1:26128828	chr1	26128828	S1_26128828	T	C	T	C	0.71429	0.28571	0	2	0.28571	C	0.6667	0	T	2	7.1369	0.047914	-1.07019	9.21572	0.0385628	-0.5406	0.89547	0.397582	5	0.781107	0.0842169	0.295675	7.47308	0.197401	1	C/T/Y	-0.529593	1.61079	0	1	4	2	Intron (ENSSSCT00000023062.3/ENSSSCG00000022968.3, intron 16 of 32)	1	26091113	26095557	4445	1	ENSSSCT00000086855.1	37715	ENSSSCG00000046952	ENSSSCG00000046952
chr1:26128933	chr1	26128933	S1_26128933	C	T	C	T	0.78571	0.21429	0	1	0.14286	T	0	0.375	C	2	18797.8	1.13176e-08	-0.425003	37595	4.24439e-09	0.697797	0.301907	0.611924	5	0.999894	0.960919	9.60919e-06	11.6621	8.89569e-08	0.00102627	C/T/Y	-1.1228	-0.272794	0	5	1	1	Intron (ENSSSCT00000023062.3/ENSSSCG00000022968.3, intron 16 of 32)	1	26091113	26095557	4445	1	ENSSSCT00000086855.1	37820	ENSSSCG00000046952	ENSSSCG00000046952
chr1:26184294	chr1	26184294	S1_26184294	C	T	C	T	0.75	0.25	0.14286	1	0.16667	T	0.1667	0.3333	C	2	0.107677	0.901237	-0.121119	0.0458693	0.844145	-0.61633	0.188031	0.69385	4	0.0339234	1.42902	1.42902e-05	11.7899	0.986747	1	C/T/Y	0.495211	0.737449	0	4	1	1	Promoter (1-2kb)	1	26186069	26188749	2681	1	ENSSSCT00000076717.1	-1775	ENSSSCG00000045653	ENSSSCG00000045653
chr1:26280147	chr1	26280147	S1_26280147	G	A	G	A	0.66667	0.33333	0.14286	2	0.33333	A	0.5	0.1667	G	2	0.283665	0.7712	-0.520656	0.566452	0.506345	0.378278	0.105902	0.766235	4	0.0805506	1.28802	1.28802e-05	11.0216	0.91773	1	A/G/R	-0.898934	0.142378	0	1	3	2	Distal Intergenic	1	26301252	26317869	16618	1	ENSSSCT00000051639.2	-21105	ENSSSCG00000038420	ENSSSCG00000038420
chr1:26524688	chr1	26524688	S1_26524688	T	C	T	C	0.57143	0.42857	0	4	0.57143	C	0.5	0.375	T	2	24170.4	6.84573e-09	-0.318883	0.383389	0.569319	1.16889	5.15131	0.0857608	5	0.999917	0.747343	7.47343e-06	10.3541	6.87827e-08	0.000620764	C/T/Y	-1.48777	-0.850009	0	1	2	4	Promoter (<=1kb)	1	26524670	26527005	2336	1	ENSSSCT00000087586.1	18	ENSSSCG00000041354	ENSSSCG00000041354
chr1:26541920	chr1	26541920	S1_26541920	C	T	C	T	0.64286	0.35714	0	3	0.42857	T	0.5	0.25	C	2	15882.6	1.58529e-08	0.378223	0.354429	0.583664	1.22821	3.73739	0.125349	5	0.999874	1.13727	1.13727e-05	11.9158	9.61171e-08	0.00143753	C/T/Y	-0.849989	-1.60643	0	3	1	3	Distal Intergenic	1	26523348	26525804	2457	2	ENSSSCT00000074960.1	-16116	ENSSSCG00000045966	ENSSSCG00000045966
chr1:26541936	chr1	26541936	S1_26541936	T	A	T	A	0.64286	0.35714	0	3	0.42857	A	0.5	0.25	T	2	15882.6	1.58529e-08	-0.378223	0.354429	0.583664	1.22821	3.73739	0.125349	5	0.999874	1.13727	1.13727e-05	11.9158	9.61171e-08	0.00143753	A/T/W	-1.60643	-0.849989	0	1	3	3	Distal Intergenic	1	26523348	26525804	2457	2	ENSSSCT00000074960.1	-16132	ENSSSCG00000045966	ENSSSCG00000045966
chr1:26541948	chr1	26541948	S1_26541948	T	G	T	G	0.64286	0.35714	0	3	0.42857	G	0.5	0.25	T	2	15882.6	1.58529e-08	-0.378223	0.354429	0.583664	1.22821	3.73739	0.125349	5	0.999874	1.13727	1.13727e-05	11.9158	9.61171e-08	0.00143753	G/T/K	-1.60643	-0.849989	0	1	3	3	Distal Intergenic	1	26523348	26525804	2457	2	ENSSSCT00000074960.1	-16144	ENSSSCG00000045966	ENSSSCG00000045966
chr1:26541950	chr1	26541950	S1_26541950	T	C	T	C	0.64286	0.35714	0	3	0.42857	C	0.5	0.25	T	2	15882.6	1.58529e-08	-0.378223	0.354429	0.583664	1.22821	3.73739	0.125349	5	0.999874	1.13727	1.13727e-05	11.9158	9.61171e-08	0.00143753	C/T/Y	-1.60643	-0.849989	0	1	3	3	Distal Intergenic	1	26523348	26525804	2457	2	ENSSSCT00000074960.1	-16146	ENSSSCG00000045966	ENSSSCG00000045966
chr1:26541965	chr1	26541965	S1_26541965	C	T	C	T	0.64286	0.35714	0	3	0.42857	T	0.5	0.25	C	2	15882.6	1.58529e-08	0.378223	0.354429	0.583664	1.22821	3.73739	0.125349	5	0.999874	1.13727	1.13727e-05	11.9158	9.61171e-08	0.00143753	C/T/Y	-0.849989	-1.60643	0	3	1	3	Distal Intergenic	1	26523348	26525804	2457	2	ENSSSCT00000074960.1	-16161	ENSSSCG00000045966	ENSSSCG00000045966
chr1:26541972	chr1	26541972	S1_26541972	T	C	T	C	0.64286	0.35714	0	3	0.42857	C	0.5	0.25	T	2	15882.6	1.58529e-08	-0.378223	0.354429	0.583664	1.22821	3.73739	0.125349	5	0.999874	1.13727	1.13727e-05	11.9158	9.61171e-08	0.00143753	C/T/Y	-1.60643	-0.849989	0	1	3	3	Distal Intergenic	1	26523348	26525804	2457	2	ENSSSCT00000074960.1	-16168	ENSSSCG00000045966	ENSSSCG00000045966
chr1:26542093	chr1	26542093	S1_26542093	C	A	C	A	0.57143	0.42857	0	4	0.57143	A	0.1667	0.625	C	2	33840.8	3.49243e-09	0.481447	2.137	0.217594	1.33144	16.3434	0.0155693	5	0.999941	0.533794	5.33794e-06	9.5657	4.50164e-08	0.00031669	A/C/M	-0.849997	-1.81289	0	1	2	4	Distal Intergenic	1	26523348	26525804	2457	2	ENSSSCT00000074960.1	-16289	ENSSSCG00000045966	ENSSSCG00000045966
chr1:26685050	chr1	26685050	S1_26685050	A	G	A	G	0.6	0.4	0.28571	2	0.4	G	0.5	0.3333	A	2	1.6187	0.381869	0.815328	1.44883	0.351854	1.32299	2.32684	0.266673	3	0.585342	0.924182	9.24182e-06	5.92891	0.708059	1	A/G/R	-0.507664	-2.13832	0	2	1	2	Distal Intergenic	1	26626703	26632376	5674	2	ENSSSCT00000075556.1	-52674	ENSSSCG00000046825	ENSSSCG00000046825
chr1:26770515	chr1	26770515	S1_26770515	C	T	C	T	0.58333	0.41667	0.14286	3	0.5	T	0.1667	0.6667	C	2	5.70811	0.0949302	-1.415	10.3782	0.0485279	0.125001	0.0428775	0.849215	4	0.791901	5.14461e-06	0.514461	7.73615	0.326736	1	C/T/Y	-1.54	1.29	0	2	1	3	Distal Intergenic	1	26800671	26801489	819	1	ENSSSCT00000004593.2	-30156	ENSSSCG00000004155	ENSSSCG00000004155
chr1:26770551	chr1	26770551	S1_26770551	G	A	G	A	0.58333	0.41667	0.14286	3	0.5	A	0.1667	0.6667	G	2	5.70811	0.0949302	1.415	10.3782	0.0485279	0.125001	0.0428775	0.849215	4	0.791901	5.14461e-06	0.514461	7.73615	0.326736	1	A/G/R	1.29	-1.54	0	1	2	3	Distal Intergenic	1	26800671	26801489	819	1	ENSSSCT00000004593.2	-30120	ENSSSCG00000004155	ENSSSCG00000004155
chr1:26770587	chr1	26770587	S1_26770587	C	T	C	T	0.5	0.5	0.14286	2	0.33333	T	0.1667	0.8333	C	2	5.98116	0.0897807	-1.08443	11.9382	0.0407829	0.101129	0.0267228	0.88054	4	0.000830896	0.412957	4.12957e-06	7.72617	0.31121	1	C/T/Y	-1.18556	0.983304	0	2	2	2	Distal Intergenic	1	26800671	26801489	819	1	ENSSSCT00000004593.2	-30084	ENSSSCG00000004155	ENSSSCG00000004155
chr1:26770612	chr1	26770612	S1_26770612	C	T	C	T	0.5	0.5	0.14286	2	0.33333	C	0.1667	0.8333	T	2	5.98116	0.0897807	1.08443	11.9382	0.0407829	0.101129	0.0267228	0.88054	4	0.000830896	0.412957	4.12957e-06	7.72617	0.31121	1	C/T/Y	0.983304	-1.18556	0	2	2	2	Distal Intergenic	1	26800671	26801489	819	1	ENSSSCT00000004593.2	-30059	ENSSSCG00000004155	ENSSSCG00000004155
chr1:26770613	chr1	26770613	S1_26770613	A	G	A	G	0.5	0.5	0.14286	2	0.33333	A	0.1667	0.8333	G	2	5.98116	0.0897807	1.08443	11.9382	0.0407829	0.101129	0.0267228	0.88054	4	0.000830896	0.412957	4.12957e-06	7.72617	0.31121	1	A/G/R	0.983304	-1.18556	0	2	2	2	Distal Intergenic	1	26800671	26801489	819	1	ENSSSCT00000004593.2	-30058	ENSSSCG00000004155	ENSSSCG00000004155
chr1:26770631	chr1	26770631	S1_26770631	G	A	G	A	0.58333	0.41667	0.14286	1	0.16667	A	0.8333	0	G	2	23.3511	0.0148292	-1.07073	42.2048	0.00740579	-0.555142	1.75142	0.277516	4	0.000976546	0.124316	1.24316e-06	4.08259	0.0653242	1	A/G/R	-0.515593	1.62588	0	2	3	1	Distal Intergenic	1	26800671	26801489	819	1	ENSSSCT00000004593.2	-30040	ENSSSCG00000004155	ENSSSCG00000004155
chr1:26770647	chr1	26770647	S1_26770647	C	T	C	T	0.5	0.5	0.14286	2	0.33333	T	0.1667	0.8333	C	2	5.98116	0.0897807	-1.08443	11.9382	0.0407829	0.101129	0.0267228	0.88054	4	0.000830896	0.412957	4.12957e-06	7.72617	0.31121	1	C/T/Y	-1.18556	0.983304	0	2	2	2	Distal Intergenic	1	26800671	26801489	819	1	ENSSSCT00000004593.2	-30024	ENSSSCG00000004155	ENSSSCG00000004155
chr1:26777129	chr1	26777129	S1_26777129	C	A	C	A	0.57143	0.42857	0	2	0.28571	A	0.8333	0.125	C	2	3.8373	0.117391	-1.00833	7.66898	0.0503675	0.251674	0.140517	0.726795	5	0.657376	6.36362e-06	0.636362	9.5436	0.395428	1	A/C/M	-1.26	0.756657	0	2	3	2	Distal Intergenic	1	26800671	26801489	819	1	ENSSSCT00000004593.2	-23542	ENSSSCG00000004155	ENSSSCG00000004155
chr1:26777248	chr1	26777248	S1_26777248	T	A	T	A	0.78571	0.21429	0	1	0.14286	A	0.1667	0.25	T	2	18593.3	1.15679e-08	0.425001	37185.5	4.33837e-09	-1.42812	1.47888	0.290806	5	0.999892	0.971489	9.71489e-06	11.8733	8.89569e-08	0.00104897	A/T/W	1.85312	1.00312	0	1	5	1	Distal Intergenic	1	26800671	26801489	819	1	ENSSSCT00000004593.2	-23423	ENSSSCG00000004155	ENSSSCG00000004155
chr1:26777908	chr1	26777908	S1_26777908	T	C	C	T	0.5	0.5	0	3	0.42857	C	0.8333	0.25	T	2	2.94392	0.163651	-0.987497	5.19136	0.0849311	0.552504	0.696476	0.450913	5	0.595462	7.51355e-06	0.751355	10.208	0.506024	1	C/T/Y	-1.54	0.434992	0	2	2	3	Distal Intergenic	1	26800671	26801489	819	1	ENSSSCT00000004593.2	-22763	ENSSSCG00000004155	ENSSSCG00000004155
chr1:26777909	chr1	26777909	S1_26777909	G	A	A	G	0.5	0.5	0	3	0.42857	A	0.8333	0.25	G	2	2.94392	0.163651	-0.987497	5.19136	0.0849311	0.552504	0.696476	0.450913	5	0.595462	7.51355e-06	0.751355	10.208	0.506024	1	A/G/R	-1.54	0.434992	0	2	2	3	Distal Intergenic	1	26800671	26801489	819	1	ENSSSCT00000004593.2	-22762	ENSSSCG00000004155	ENSSSCG00000004155
chr1:26988202	chr1	26988202	S1_26988202	G	A	G	A	0.64286	0.35714	0	3	0.42857	A	0.6667	0.125	G	2	1.27298	0.373399	-0.696506	1.24936	0.326273	-0.594489	0.455472	0.536747	5	0.388936	0.690919	0.335997	11.0414	0.706414	1	A/G/R	-0.102018	1.291	0	1	3	3	Distal Intergenic	1	27037165	27061093	23929	1	ENSSSCT00000034018.3	-48963	ENSSSCG00000004156	ENSSSCG00000004156
chr1:26988227	chr1	26988227	S1_26988227	T	A	T	A	0.64286	0.35714	0	3	0.42857	A	0.6667	0.125	T	2	1.27298	0.373399	-0.696506	1.24936	0.326273	-0.594489	0.455472	0.536747	5	0.388936	0.690919	0.335997	11.0414	0.706414	1	A/T/W	-0.102018	1.291	0	1	3	3	Distal Intergenic	1	27037165	27061093	23929	1	ENSSSCT00000034018.3	-48938	ENSSSCG00000004156	ENSSSCG00000004156
chr1:26988292	chr1	26988292	S1_26988292	C	A	C	A	0.64286	0.35714	0	3	0.42857	A	0.6667	0.125	C	2	1.27298	0.373399	-0.696506	1.24936	0.326273	-0.594489	0.455472	0.536747	5	0.388936	0.690919	0.335997	11.0414	0.706414	1	A/C/M	-0.102018	1.291	0	1	3	3	Distal Intergenic	1	27037165	27061093	23929	1	ENSSSCT00000034018.3	-48873	ENSSSCG00000004156	ENSSSCG00000004156
chr1:26988294	chr1	26988294	S1_26988294	G	C	G	C	0.64286	0.35714	0	3	0.42857	C	0.6667	0.125	G	2	1.27298	0.373399	-0.696506	1.24936	0.326273	-0.594489	0.455472	0.536747	5	0.388936	0.690919	0.335997	11.0414	0.706414	1	C/G/S	-0.102018	1.291	0	1	3	3	Distal Intergenic	1	27037165	27061093	23929	1	ENSSSCT00000034018.3	-48871	ENSSSCG00000004156	ENSSSCG00000004156
chr1:26988306	chr1	26988306	S1_26988306	T	G	T	G	0.64286	0.35714	0	3	0.42857	G	0.6667	0.125	T	2	1.27298	0.373399	-0.696506	1.24936	0.326273	-0.594489	0.455472	0.536747	5	0.388936	0.690919	0.335997	11.0414	0.706414	1	G/T/K	-0.102018	1.291	0	1	3	3	Distal Intergenic	1	27037165	27061093	23929	1	ENSSSCT00000034018.3	-48859	ENSSSCG00000004156	ENSSSCG00000004156
chr1:26988350	chr1	26988350	S1_26988350	C	T	C	T	0.64286	0.35714	0	3	0.42857	T	0.6667	0.125	C	2	1.27298	0.373399	0.696506	1.24936	0.326273	-0.594489	0.455472	0.536747	5	0.388936	0.690919	0.335997	11.0414	0.706414	1	C/T/Y	1.291	-0.102018	0	3	1	3	Distal Intergenic	1	27037165	27061093	23929	1	ENSSSCT00000034018.3	-48815	ENSSSCG00000004156	ENSSSCG00000004156
chr1:26988414	chr1	26988414	S1_26988414	C	T	C	T	0.71429	0.28571	0	2	0.28571	T	0.6667	0	C	2	7.21386	0.0471169	0.71717	4.17433	0.110551	-1.25092	4.91298	0.0909631	5	0.782936	0.0772447	0.301178	7.47539	0.195368	1	C/T/Y	1.96809	0.533747	0	4	1	2	Distal Intergenic	1	27037165	27061093	23929	1	ENSSSCT00000034018.3	-48751	ENSSSCG00000004156	ENSSSCG00000004156
chr1:27011019	chr1	27011019	S1_27011019	T	A	T	A	0.75	0.25	0.14286	1	0.16667	A	0.3333	0.1667	T	2	0.258753	0.787644	-0.353939	0.201499	0.683958	1.15269	0.44244	0.553514	4	0.145575	1.29955	0.48615	11.7468	0.926341	1	A/T/W	-1.50663	-0.79875	0	1	4	1	Distal Intergenic	1	27037165	27061093	23929	1	ENSSSCT00000034018.3	-26146	ENSSSCG00000004156	ENSSSCG00000004156
chr1:27050957	chr1	27050957	S1_27050957	T	C	T	C	0.78571	0.21429	0	1	0.14286	C	0	0.375	T	2	0.286134	0.765344	-0.15245	0.0929695	0.775642	1.11253	0.554354	0.497908	5	0.125161	0.814309	0.634194	13.1523	0.911583	1	C/T/Y	-1.26498	-0.960083	0	1	5	1	Intron (ENSSSCT00000034018.3/ENSSSCG00000004156.5, intron 5 of 7)	1	27039708	27043396	3689	2	ENSSSCT00000090019.1	-7561	ENSSSCG00000050929	ENSSSCG00000050929
chr1:27050965	chr1	27050965	S1_27050965	C	T	C	T	0.78571	0.21429	0	1	0.14286	T	0	0.375	C	2	0.286134	0.765344	0.15245	0.0929695	0.775642	1.11253	0.554354	0.497908	5	0.125161	0.814309	0.634194	13.1523	0.911583	1	C/T/Y	-0.960083	-1.26498	0	5	1	1	Intron (ENSSSCT00000034018.3/ENSSSCG00000004156.5, intron 5 of 7)	1	27039708	27043396	3689	2	ENSSSCT00000090019.1	-7569	ENSSSCG00000050929	ENSSSCG00000050929
chr1:27050984	chr1	27050984	S1_27050984	T	C	T	C	0.78571	0.21429	0	1	0.14286	C	0	0.375	T	2	0.286134	0.765344	-0.15245	0.0929695	0.775642	1.11253	0.554354	0.497908	5	0.125161	0.814309	0.634194	13.1523	0.911583	1	C/T/Y	-1.26498	-0.960083	0	1	5	1	Intron (ENSSSCT00000034018.3/ENSSSCG00000004156.5, intron 5 of 7)	1	27039708	27043396	3689	2	ENSSSCT00000090019.1	-7588	ENSSSCG00000050929	ENSSSCG00000050929
chr1:27074366	chr1	27074366	S1_27074366	A	G	A	G	0.625	0.375	0.42857	1	0.25	G	1	0.1667	A	2	2.76322	0.391437	0.828553	5.37894	0.25916	0.67203	0.758965	0.543756	2	0.84677	0.319424	3.19424e-06	Inf	0.719332	1	A/G/R	0.156523	-1.50058	0	2	1	1	Promoter (<=1kb)	1	27073912	27090235	16324	1	ENSSSCT00000004597.4	454	ENSSSCG00000004158	ENSSSCG00000004158
chr1:27074412	chr1	27074412	S1_27074412	T	C	T	C	0.625	0.375	0.42857	1	0.25	C	1	0.1667	T	2	2.76322	0.391437	-0.828553	5.37894	0.25916	0.67203	0.758965	0.543756	2	0.84677	0.319424	3.19424e-06	Inf	0.719332	1	C/T/Y	-1.50058	0.156523	0	1	2	1	Promoter (<=1kb)	1	27073912	27090235	16324	1	ENSSSCT00000004597.4	500	ENSSSCG00000004158	ENSSSCG00000004158
chr1:27074427	chr1	27074427	S1_27074427	C	T	C	T	0.625	0.375	0.42857	1	0.25	T	1	0.1667	C	2	2.76322	0.391437	0.828553	5.37894	0.25916	0.67203	0.758965	0.543756	2	0.84677	0.319424	3.19424e-06	Inf	0.719332	1	C/T/Y	0.156523	-1.50058	0	2	1	1	Promoter (<=1kb)	1	27073912	27090235	16324	1	ENSSSCT00000004597.4	515	ENSSSCG00000004158	ENSSSCG00000004158
chr1:27296122	chr1	27296122	S1_27296122	G	A	G	A	0.66667	0.33333	0.14286	2	0.33333	A	0.1667	0.5	G	2	1.17742	0.419336	1.06155	2.31923	0.225158	-0.394256	0.140856	0.732396	4	0.439703	0.34251	0.932078	10.5951	0.750103	1	A/G/R	1.4558	-0.667289	0	1	3	2	Intron (ENSSSCT00000047196.2/ENSSSCG00000004160.4, intron 9 of 10)	1	27335794	27335889	96	1	ENSSSCT00000021974.2	-39672	ENSSSCG00000020379	ENSSSCG00000020379
chr1:27329043	chr1	27329043	S1_27329043	A	G	A	G	0.625	0.375	0.42857	1	0.25	G	1	0.1667	A	2	5.21738	0.295724	0.946651	9.86702	0.196211	0.472253	1.07415	0.488618	2	0.91254	0.182312	1.82312e-06	Inf	0.632606	1	A/G/R	0.474397	-1.4189	0	2	1	1	Intron (ENSSSCT00000047196.2/ENSSSCG00000004160.4, intron 6 of 10)	1	27335794	27335889	96	1	ENSSSCT00000021974.2	-6751	ENSSSCG00000020379	ENSSSCG00000020379
chr1:27335485	chr1	27335485	S1_27335485	C	T	C	T	0.71429	0.28571	0	2	0.28571	T	0.1667	0.375	C	2	12738.4	2.46428e-08	0.424994	25476.7	9.24168e-09	-0.269228	0.0537838	0.827987	5	0.999843	1.41793	1.41793e-05	13.317	1.30388e-07	0.00223459	C/T/Y	0.694222	-0.155767	0	4	1	2	Promoter (<=1kb)	1	27335794	27335889	96	1	ENSSSCT00000021974.2	-309	ENSSSCG00000020379	ENSSSCG00000020379
chr1:27335505	chr1	27335505	S1_27335505	G	C	G	C	0.71429	0.28571	0	2	0.28571	C	0.1667	0.375	G	2	12738.4	2.46428e-08	-0.424994	25476.7	9.24168e-09	-0.269228	0.0537838	0.827987	5	0.999843	1.41793	1.41793e-05	13.317	1.30388e-07	0.00223459	C/G/S	-0.155767	0.694222	0	1	4	2	Promoter (<=1kb)	1	27335794	27335889	96	1	ENSSSCT00000021974.2	-289	ENSSSCG00000020379	ENSSSCG00000020379
chr1:27367275	chr1	27367275	S1_27367275	A	G	A	G	0.57143	0.42857	0	2	0.28571	G	0.3333	0.5	A	2	19712.2	1.0292e-08	-0.23071	0.24295	0.647916	0.619303	1.75053	0.256375	5	0.999899	0.916347	9.16347e-06	11.1591	8.79033e-08	0.000933269	A/G/R	-0.850013	-0.388593	0	3	2	2	Intron (ENSSSCT00000089784.1/ENSSSCG00000050757.1, intron 2 of 2)	1	27380142	27600495	220354	1	ENSSSCT00000025418.3	-12867	ENSSSCG00000026041	ENSSSCG00000026041
chr1:27367314	chr1	27367314	S1_27367314	G	A	G	A	0.66667	0.33333	0.14286	2	0.33333	A	0.3333	0.3333	G	2	6.23214	0.0854452	-0.158334	0.263055	0.643407	1.69666	12.0823	0.0401725	4	0.806004	2.85903e-06	0.285903	5.97375	0.299512	1	A/G/R	-1.855	-1.53833	0	1	3	2	Intron (ENSSSCT00000089784.1/ENSSSCG00000050757.1, intron 2 of 2)	1	27380142	27600495	220354	1	ENSSSCT00000025418.3	-12828	ENSSSCG00000026041	ENSSSCG00000026041
chr1:27367371	chr1	27367371	S1_27367371	G	A	G	A	0.66667	0.33333	0.14286	2	0.33333	A	0.3333	0.3333	G	2	6.23214	0.0854452	-0.158334	0.263055	0.643407	1.69666	12.0823	0.0401725	4	0.806004	2.85903e-06	0.285903	5.97375	0.299512	1	A/G/R	-1.855	-1.53833	0	1	3	2	Intron (ENSSSCT00000089784.1/ENSSSCG00000050757.1, intron 2 of 2)	1	27380142	27600495	220354	1	ENSSSCT00000025418.3	-12771	ENSSSCG00000026041	ENSSSCG00000026041
chr1:27372036	chr1	27372036	S1_27372036	G	A	G	A	0.66667	0.33333	0.14286	2	0.33333	A	0.1667	0.5	G	2	0.221111	0.813624	0.231662	0.125349	0.746726	0.436668	0.178143	0.701395	4	0.12847	1.28443e-05	1.28443	10.481	0.940348	1	A/G/R	-0.205006	-0.66833	0	1	3	2	Intron (ENSSSCT00000089784.1/ENSSSCG00000050757.1, intron 2 of 2)	1	27380142	27600495	220354	1	ENSSSCT00000025418.3	-8106	ENSSSCG00000026041	ENSSSCG00000026041
chr1:27661371	chr1	27661371	S1_27661371	T	A	T	A	0.57143	0.42857	0	4	0.57143	A	0.5	0.375	T	2	2.73084	0.178724	0.610002	1.26371	0.323848	-1.58999	5.15143	0.0857583	5	0.577242	7.85196e-06	0.785196	10.3843	0.510969	1	A/T/W	2.2	0.979992	0	1	2	4	Intron (ENSSSCT00000046954.2/ENSSSCG00000039049.2, intron 1 of 17)	1	27679355	27781924	102570	1	ENSSSCT00000062995.2	-17984	ENSSSCG00000039049	ENSSSCG00000039049
chr1:27661423	chr1	27661423	S1_27661423	C	T	C	T	0.71429	0.28571	0	2	0.28571	T	0.3333	0.25	C	2	22749.1	7.7278e-09	0.424997	45495.3	2.89837e-09	-1.16156	2.02694	0.22763	5	0.999912	0.794032	7.94032e-06	11.1232	7.34443e-08	0.000700749	C/T/Y	1.58656	0.736564	0	4	1	2	Intron (ENSSSCT00000046954.2/ENSSSCG00000039049.2, intron 1 of 17)	1	27679355	27781924	102570	1	ENSSSCT00000062995.2	-17932	ENSSSCG00000039049	ENSSSCG00000039049
chr1:27675128	chr1	27675128	S1_27675128	G	T	G	T	0.7	0.3	0.28571	1	0.2	T	0	0.5	G	2	5.40162	0.156211	-0.741666	7.35928	0.11326	0.611663	1.25137	0.379617	3	0.843789	2.24231e-06	0.224231	2.68562	0.489343	1	G/T/K	-1.35333	0.130003	0	3	1	1	Intron (ENSSSCT00000046954.2/ENSSSCG00000039049.2, intron 1 of 17)	1	27679355	27781924	102570	1	ENSSSCT00000062995.2	-4227	ENSSSCG00000039049	ENSSSCG00000039049
chr1:27675181	chr1	27675181	S1_27675181	C	A	C	A	0.7	0.3	0.28571	1	0.2	A	0	0.5	C	2	5.40162	0.156211	0.741666	7.35928	0.11326	0.611663	1.25137	0.379617	3	0.843789	2.24231e-06	0.224231	2.68562	0.489343	1	A/C/M	0.130003	-1.35333	0	1	3	1	Intron (ENSSSCT00000046954.2/ENSSSCG00000039049.2, intron 1 of 17)	1	27679355	27781924	102570	1	ENSSSCT00000062995.2	-4174	ENSSSCG00000039049	ENSSSCG00000039049
chr1:27709618	chr1	27709618	S1_27709618	A	C	A	C	0.57143	0.42857	0	2	0.28571	C	0.5	0.375	A	2	1.19238	0.392493	0.467732	0.762024	0.431967	0.258275	0.15819	0.711141	5	0.373508	1.2648	0.138281	13.0361	0.719603	1	A/C/M	0.209457	-0.726007	0	3	2	2	Intron (ENSSSCT00000046954.2/ENSSSCG00000039049.2, intron 1 of 17)	1	27679355	27781924	102570	1	ENSSSCT00000062995.2	30263	ENSSSCG00000039049	ENSSSCG00000039049
chr1:27709670	chr1	27709670	S1_27709670	G	C	G	C	0.57143	0.42857	0	2	0.28571	C	0.5	0.375	G	2	1.19238	0.392493	-0.467732	0.762024	0.431967	0.258275	0.15819	0.711141	5	0.373508	1.2648	0.138281	13.0361	0.719603	1	C/G/S	-0.726007	0.209457	0	2	3	2	Intron (ENSSSCT00000046954.2/ENSSSCG00000039049.2, intron 1 of 17)	1	27679355	27781924	102570	1	ENSSSCT00000062995.2	30315	ENSSSCG00000039049	ENSSSCG00000039049
chr1:28036702	chr1	28036702	S1_28036702	C	T	C	T	0.5	0.5	0.28571	1	0.2	C	1	0.1667	T	2	24.2862	0.0395472	-1.21987	36.5799	0.0262652	0.744438	5.39175	0.145934	3	0.91232	0.111121	1.11121e-06	1.88895	0.165167	1	C/T/Y	-1.9643	0.475428	0	2	2	1	Intron (ENSSSCT00000004604.4/ENSSSCG00000004165.4, intron 3 of 12)	1	27958270	28115273	157004	2	ENSSSCT00000004604.4	78571	ENSSSCG00000004165	ENSSSCG00000004165
chr1:28400252	chr1	28400252	S1_28400252	A	G	A	G	0.78571	0.21429	0	1	0.14286	G	0.3333	0.125	A	2	2.51906	0.195868	0.707647	2.0745	0.223205	2.33826	4.38819	0.104264	5	0.55743	0.373335	0.359796	9.78334	0.526111	1	A/G/R	-1.63061	-3.04591	0	5	1	1	Distal Intergenic	1	28338396	28345109	6714	2	ENSSSCT00000086106.1	-55143	ENSSSCG00000050113	ENSSSCG00000050113
chr1:28400337	chr1	28400337	S1_28400337	C	T	T	C	0.58333	0.41667	0.14286	3	0.5	C	0.3333	0.5	T	2	21077.4	6.00297e-07	0.965058	2.46926	0.21413	-0.115066	0.035103	0.863335	4	0.999929	0.856983	8.56983e-06	8.88694	2.93916e-06	0.0544343	C/T/Y	1.08012	-0.849992	0	1	2	3	Distal Intergenic	1	28338396	28345109	6714	2	ENSSSCT00000086106.1	-55228	ENSSSCG00000050113	ENSSSCG00000050113
chr1:28921547	chr1	28921547	S1_28921547	C	T	C	T	0.58333	0.41667	0.14286	3	0.5	T	0.25	0.5	C	2	14190.3	1.08662e-06	0.255223	0.207724	0.679524	0.59477	1.12807	0.36611	4	0.999894	1.27286	1.27286e-05	10.9275	5.18982e-06	0.098534	C/T/Y	-0.339547	-0.849993	0	2	1	3	Distal Intergenic	1	28902294	28907778	5485	2	ENSSSCT00000087477.1	-13769	ENSSSCG00000041469	ENSSSCG00000041469
chr1:28921686	chr1	28921686	S1_28921686	G	A	G	A	0.71429	0.28571	0	2	0.28571	A	0.1667	0.375	G	2	0.128307	0.883062	-0.0350008	0.00302496	0.958776	0.583498	0.244116	0.647151	5	0.0602861	0.465364	1.13963	13.453	0.971372	1	A/G/R	-0.618499	-0.548497	0	1	4	2	Distal Intergenic	1	28902294	28907778	5485	2	ENSSSCT00000087477.1	-13908	ENSSSCG00000041469	ENSSSCG00000041469
chr1:29219164	chr1	29219164	S1_29219164	C	T	C	T	0.5	0.5	0	3	0.42857	C	0.5	0.5	T	2	13507.8	2.19161e-08	0.179896	0.109467	0.757358	0.670097	1.5188	0.285287	5	0.999852	1.33719	1.33719e-05	12.7491	1.19784e-07	0.00198733	C/T/Y	-0.490201	-0.849993	0	2	2	3	Intron (ENSSSCT00000066719.1/ENSSSCG00000049766.1, intron 2 of 6)	1	29186768	29330307	143540	1	ENSSSCT00000066719.1	32396	ENSSSCG00000049766	ENSSSCG00000049766
chr1:29219201	chr1	29219201	S1_29219201	G	T	G	T	0.5	0.5	0	3	0.42857	G	0.5	0.5	T	2	13507.8	2.19161e-08	0.179896	0.109467	0.757358	0.670097	1.5188	0.285287	5	0.999852	1.33719	1.33719e-05	12.7491	1.19784e-07	0.00198733	G/T/K	-0.490201	-0.849993	0	2	2	3	Intron (ENSSSCT00000066719.1/ENSSSCG00000049766.1, intron 2 of 6)	1	29186768	29330307	143540	1	ENSSSCT00000066719.1	32433	ENSSSCG00000049766	ENSSSCG00000049766
chr1:29219301	chr1	29219301	S1_29219301	C	T	C	T	0.5	0.5	0.14286	4	0.66667	T	0.6667	0.3333	C	2	1.13971	0.428354	1.14	1.85019	0.26695	-0.672498	0.429238	0.559118	4	0.431756	1.40481e-05	1.40481	10.7498	0.757801	1	C/T/Y	1.8125	-0.467501	0	1	1	4	Intron (ENSSSCT00000066719.1/ENSSSCG00000049766.1, intron 2 of 6)	1	29186768	29330307	143540	1	ENSSSCT00000066719.1	32533	ENSSSCG00000049766	ENSSSCG00000049766
chr1:29219418	chr1	29219418	S1_29219418	C	T	C	T	0.58333	0.41667	0.14286	3	0.5	T	0.5	0.3333	C	2	0.24094	0.799763	0.257759	0.0808875	0.7946	0.784937	0.464767	0.544319	4	0.000143832	1.77456	1.77456e-05	11.9865	0.934858	1	C/T/Y	-0.527178	-1.0427	0	2	1	3	Intron (ENSSSCT00000066719.1/ENSSSCG00000049766.1, intron 2 of 6)	1	29186768	29330307	143540	1	ENSSSCT00000066719.1	32650	ENSSSCG00000049766	ENSSSCG00000049766
chr1:29329667	chr1	29329667	S1_29329667	G	A	G	A	0.7	0.3	0.28571	1	0.2	A	0.25	0.3333	G	2	1.91396	0.343176	0.596054	1.09255	0.405622	-2.04566	3.69981	0.194326	3	0.632575	0.662489	0.0145673	5.02	0.696766	1	A/G/R	2.64172	1.44961	0	1	3	1	Exon (ENSSSCT00000066719.1/ENSSSCG00000049766.1, exon 7 of 7)	1	29364499	29364604	106	2	ENSSSCT00000021166.2	34937	ENSSSCG00000019571	ENSSSCG00000019571
chr1:29391254	chr1	29391254	S1_29391254	C	G	C	G	0.58333	0.41667	0.14286	1	0.16667	G	0.6667	0.1667	C	2	1.16031	0.423389	0.520805	0.831667	0.429032	1.22952	1.56971	0.299015	4	0.000453284	1.16129	1.16129e-05	11.0564	0.754361	1	C/G/S	-0.708711	-1.75032	0	3	2	1	Distal Intergenic	1	29374416	29377811	3396	2	ENSSSCT00000083864.1	-13443	ENSSSCG00000045292	ENSSSCG00000045292
chr1:29431437	chr1	29431437	S1_29431437	G	A	A	G	0.5	0.5	0.28571	1	0.2	A	0.75	0.3333	G	2	1.12922	0.469656	-0.253832	0.255719	0.663303	-1.56643	1.81481	0.31027	3	0.505856	0.924182	9.24182e-06	5.92891	0.781202	1	A/G/R	1.3126	1.82026	0	2	2	1	Distal Intergenic	1	29415518	29419241	3724	1	ENSSSCT00000066508.1	15919	ENSSSCG00000051035	ENSSSCG00000051035
chr1:29431455	chr1	29431455	S1_29431455	G	A	A	G	0.5	0.5	0.28571	1	0.2	A	0.75	0.3333	G	2	1.12922	0.469656	-0.253832	0.255719	0.663303	-1.56643	1.81481	0.31027	3	0.505856	0.924182	9.24182e-06	5.92891	0.781202	1	A/G/R	1.3126	1.82026	0	2	2	1	Distal Intergenic	1	29415518	29419241	3724	1	ENSSSCT00000066508.1	15937	ENSSSCG00000051035	ENSSSCG00000051035
chr1:29431456	chr1	29431456	S1_29431456	G	A	A	G	0.5	0.5	0.28571	1	0.2	A	0.75	0.3333	G	2	1.12922	0.469656	-0.253832	0.255719	0.663303	-1.56643	1.81481	0.31027	3	0.505856	0.924182	9.24182e-06	5.92891	0.781202	1	A/G/R	1.3126	1.82026	0	2	2	1	Distal Intergenic	1	29415518	29419241	3724	1	ENSSSCT00000066508.1	15938	ENSSSCG00000051035	ENSSSCG00000051035
chr1:29683407	chr1	29683407	S1_29683407	C	T	C	T	0.57143	0.42857	0	2	0.28571	T	0.6667	0.25	C	2	2.24216	0.222273	0.0818824	0.0350155	0.860671	-1.60864	4.20394	0.109647	5	0.528542	0.440188	0.34046	10.0917	0.536906	1	C/T/Y	1.69052	1.52676	0	3	2	2	Intron (ENSSSCT00000062973.2/ENSSSCG00000021443.3, intron 2 of 13)	1	29724075	29753600	29526	1	ENSSSCT00000037228.1	-40668	ENSSSCG00000021443	ENSSSCG00000021443
chr1:29683438	chr1	29683438	S1_29683438	C	A	C	A	0.57143	0.42857	0	2	0.28571	A	0.6667	0.25	C	2	2.24216	0.222273	-0.0818824	0.0350155	0.860671	-1.60864	4.20394	0.109647	5	0.528542	0.440188	0.34046	10.0917	0.536906	1	A/C/M	1.52676	1.69052	0	2	3	2	Intron (ENSSSCT00000062973.2/ENSSSCG00000021443.3, intron 2 of 13)	1	29724075	29753600	29526	1	ENSSSCT00000037228.1	-40637	ENSSSCG00000021443	ENSSSCG00000021443
chr1:29708516	chr1	29708516	S1_29708516	T	A	T	A	0.75	0.25	0.14286	1	0.16667	A	0	0.5	T	2	1.12529	0.431887	0.633132	0.781236	0.441856	0.736148	0.434909	0.556695	4	0.000445469	1.17678	1.17678e-05	11.0617	0.757801	1	A/T/W	-0.103016	-1.36928	0	1	4	1	Intron (ENSSSCT00000062973.2/ENSSSCG00000021443.3, intron 2 of 13)	1	29724075	29753600	29526	1	ENSSSCT00000037228.1	-15559	ENSSSCG00000021443	ENSSSCG00000021443
chr1:29746050	chr1	29746050	S1_29746050	G	A	G	A	0.57143	0.42857	0	4	0.57143	A	0.5	0.375	G	2	2.73084	0.178724	0.610002	1.26371	0.323848	-1.58999	5.15143	0.0857583	5	0.577242	7.85196e-06	0.785196	10.3843	0.510969	1	A/G/R	2.2	0.979992	0	1	2	4	Promoter (<=1kb)	1	29745114	29753599	8486	1	ENSSSCT00000037646.1	936	ENSSSCG00000021443	ENSSSCG00000021443
chr1:29808528	chr1	29808528	S1_29808528	C	T	C	T	0.64286	0.35714	0	1	0.14286	T	0.5	0.25	C	2	0.305122	0.752787	-0.216204	0.342721	0.589698	-0.801492	0.312055	0.606214	5	0.132367	1.17162	0.353887	13.2524	0.906269	1	C/T/Y	0.585288	1.0177	0	4	2	1	Distal Intergenic	1	29836056	29901995	65940	1	ENSSSCT00000004611.4	-27528	ENSSSCG00000004172	ENSSSCG00000004172
chr1:29808664	chr1	29808664	S1_29808664	C	T	C	T	0.5	0.5	0.28571	1	0.2	T	0.75	0.3333	C	2	0.928854	0.518443	0.174996	0.164599	0.724244	-1.255	1.69311	0.32291	3	0.481557	7.44195e-06	0.744195	5.08487	0.789352	1	C/T/Y	1.43	1.08	0	2	2	1	Distal Intergenic	1	29836056	29901995	65940	1	ENSSSCT00000004611.4	-27392	ENSSSCG00000004172	ENSSSCG00000004172
chr1:29932364	chr1	29932364	S1_29932364	A	G	A	G	0.66667	0.33333	0.14286	2	0.33333	G	0.5	0.1667	A	2	16394.2	8.7507e-07	0.28439	0.201561	0.683913	1.13438	3.20689	0.171255	4	0.999908	1.10177	1.10177e-05	9.83005	4.21718e-06	0.0793505	A/G/R	-0.84999	-1.41877	0	3	1	2	Promoter (<=1kb)	1	29905087	29932565	27479	2	ENSSSCT00000089460.1	201	ENSSSCG00000022387	ENSSSCG00000022387
chr1:29975873	chr1	29975873	S1_29975873	C	T	C	T	0.64286	0.35714	0	1	0.14286	T	0	0.625	C	2	19051.9	1.10177e-08	-0.368894	0.846306	0.409658	1.21889	9.23888	0.038419	5	0.999895	0.948102	9.48102e-06	12.0442	8.89569e-08	0.000999073	C/T/Y	-1.58779	-0.849996	0	4	2	1	Promoter (2-3kb)	1	29973380	29978255	4876	2	ENSSSCT00000044633.2	2382	ENSSSCG00000033258	ENSSSCG00000033258
chr1:30006036	chr1	30006036	S1_30006036	T	C	T	C	0.75	0.25	0.14286	1	0.16667	C	0.5	0	T	2	2.94583	0.195978	-0.995266	3.96549	0.140499	-0.639207	0.363423	0.589135	4	0.000688628	0.694898	6.94898e-06	9.13556	0.526111	1	C/T/Y	-0.356059	1.63447	0	1	4	1	Distal Intergenic	1	30026050	30031236	5187	1	ENSSSCT00000076434.1	-20014	ENSSSCG00000046186	ENSSSCG00000046186
chr1:30056197	chr1	30056197	S1_30056197	C	T	C	T	0.58333	0.41667	0.14286	3	0.5	T	0.5	0.375	C	2	1.89495	0.293688	-0.610003	1.31368	0.334865	-1.31999	3.25661	0.168899	4	0.558168	7.55329e-06	0.755329	8.88825	0.631388	1	C/T/Y	0.709991	1.93	0	2	1	3	Promoter (1-2kb)	1	30057784	30059967	2184	1	ENSSSCT00000089989.1	-1587	ENSSSCG00000047444	ENSSSCG00000047444
chr1:30099115	chr1	30099115	S1_30099115	T	C	T	C	0.66667	0.33333	0.14286	2	0.33333	C	0.3333	0.3333	T	2	1.82316	0.303256	0.766665	1.58017	0.297698	-1.69833	3.10169	0.176429	4	0.548622	1.11589e-05	1.11589	10.059	0.639943	1	C/T/Y	2.465	0.931668	0	1	3	2	Distal Intergenic	1	30057784	30059967	2184	1	ENSSSCT00000089989.1	41331	ENSSSCG00000047444	ENSSSCG00000047444
chr1:30283070	chr1	30283070	S1_30283070	A	C	A	C	0.71429	0.28571	0	2	0.28571	C	0.3333	0.25	A	2	4.71172	0.0887958	0.572582	1.93093	0.237003	2.08104	9.33159	0.0378515	5	0.702014	0.0794798	0.447687	8.74507	0.308172	1	A/C/M	-1.50845	-2.65362	0	4	1	2	Intron (ENSSSCT00000058643.2/ENSSSCG00000034139.2, intron 15 of 21)	1	30057784	30059967	2184	1	ENSSSCT00000089989.1	225286	ENSSSCG00000047444	ENSSSCG00000047444
chr1:30345806	chr1	30345806	S1_30345806	A	G	A	G	0.5	0.5	0	3	0.42857	G	0.5	0.5	A	2	16028.7	1.55653e-08	-0.326014	0.394482	0.564029	0.523988	1.01902	0.369856	5	0.999875	1.12691	1.12691e-05	11.9865	9.61171e-08	0.00141144	A/G/R	-0.850003	-0.197974	0	2	2	3	Intron (ENSSSCT00000058643.2/ENSSSCG00000034139.2, intron 4 of 21)	1	30261917	30532880	270964	2	ENSSSCT00000048282.2	187074	ENSSSCG00000034139	ENSSSCG00000034139
chr1:30345853	chr1	30345853	S1_30345853	T	C	C	T	0.5	0.5	0	3	0.42857	C	0.5	0.5	T	2	16028.7	1.55653e-08	0.326014	0.394482	0.564029	0.523988	1.01902	0.369856	5	0.999875	1.12691	1.12691e-05	11.9865	9.61171e-08	0.00141144	C/T/Y	-0.197974	-0.850003	0	2	2	3	Intron (ENSSSCT00000058643.2/ENSSSCG00000034139.2, intron 4 of 21)	1	30261917	30532880	270964	2	ENSSSCT00000048282.2	187027	ENSSSCG00000034139	ENSSSCG00000034139
chr1:30346083	chr1	30346083	S1_30346083	G	A	A	G	0.58333	0.41667	0.14286	3	0.5	G	0.5	0.3333	A	2	0.927132	0.485844	0.756244	0.884964	0.416245	1.09579	1.32197	0.333583	4	0.000396988	1.27286	1.27286e-05	10.9275	0.781202	1	A/G/R	-0.339547	-1.85203	0	2	1	3	Intron (ENSSSCT00000058643.2/ENSSSCG00000034139.2, intron 4 of 21)	1	30261917	30532880	270964	2	ENSSSCT00000048282.2	186797	ENSSSCG00000034139	ENSSSCG00000034139
chr1:30509207	chr1	30509207	S1_30509207	T	G	T	G	0.78571	0.21429	0	1	0.14286	G	0.3333	0.125	T	2	1.39524	0.346993	-0.475098	0.679809	0.455979	2.11712	2.65082	0.178827	5	0.410939	0.590641	0.387225	10.7715	0.696766	1	G/T/K	-2.59222	-1.64203	0	1	5	1	Intron (ENSSSCT00000058643.2/ENSSSCG00000034139.2, intron 2 of 21)	1	30261917	30532880	270964	2	ENSSSCT00000048282.2	23673	ENSSSCG00000034139	ENSSSCG00000034139
chr1:30509212	chr1	30509212	S1_30509212	A	G	A	G	0.78571	0.21429	0	1	0.14286	G	0.3333	0.125	A	2	1.39524	0.346993	0.475098	0.679809	0.455979	2.11712	2.65082	0.178827	5	0.410939	0.590641	0.387225	10.7715	0.696766	1	A/G/R	-1.64203	-2.59222	0	5	1	1	Intron (ENSSSCT00000058643.2/ENSSSCG00000034139.2, intron 2 of 21)	1	30261917	30532880	270964	2	ENSSSCT00000048282.2	23668	ENSSSCG00000034139	ENSSSCG00000034139
chr1:30573547	chr1	30573547	S1_30573547	C	T	C	T	0.5	0.5	0.14286	4	0.66667	C	0.25	0.625	T	2	25993.9	4.3832e-07	0.392238	0.613559	0.490599	1.24223	6.15403	0.0892122	4	0.999942	0.694898	6.94898e-06	9.13556	2.16531e-06	0.0397464	C/T/Y	-0.849997	-1.63447	0	1	1	4	Promoter (2-3kb)	1	30261909	30575559	313651	2	ENSSSCT00000058643.2	2012	ENSSSCG00000034139	ENSSSCG00000034139
chr1:30968077	chr1	30968077	S1_30968077	A	G	A	G	0.5	0.5	0.14286	2	0.33333	G	0.8333	0.1667	A	2	6.80564	0.0767498	1.2325	13.609	0.0345396	0.0275022	0.00225874	0.965081	4	0.8194	4.46479e-06	0.446479	7.31097	0.271033	1	A/G/R	1.205	-1.26	0	2	2	2	Intron (ENSSSCT00000004618.4/ENSSSCG00000004179.4, intron 5 of 8)	1	30961564	30970544	8981	1	ENSSSCT00000004618.4	6513	ENSSSCG00000004179	ENSSSCG00000004179
chr1:30968198	chr1	30968198	S1_30968198	C	T	C	T	0.75	0.25	0.14286	1	0.16667	T	0	0.5	C	2	2.68137	0.214862	-1.1	4.36589	0.127841	0.37	0.117609	0.754266	4	0.641266	8.8686e-06	0.88686	9.36985	0.526111	1	C/T/Y	-1.47	0.729999	0	4	1	1	Intron (ENSSSCT00000004618.4/ENSSSCG00000004179.4, intron 5 of 8)	1	30961564	30970544	8981	1	ENSSSCT00000004618.4	6634	ENSSSCG00000004179	ENSSSCG00000004179
chr1:30968414	chr1	30968414	S1_30968414	T	C	C	T	0.5	0.5	0.14286	2	0.33333	C	0.8333	0.1667	T	2	2.76988	0.208216	-0.804998	5.00659	0.111215	0.455006	0.53317	0.51813	4	0.648702	5.1773e-06	0.51773	7.75515	0.526111	1	C/T/Y	-1.26	0.349992	0	2	2	2	Intron (ENSSSCT00000004618.4/ENSSSCG00000004179.4, intron 5 of 8)	1	30961564	30970544	8981	1	ENSSSCT00000004618.4	6850	ENSSSCG00000004179	ENSSSCG00000004179
chr1:30968420	chr1	30968420	S1_30968420	A	C	A	C	0.5	0.5	0.14286	2	0.33333	C	0.8333	0.1667	A	2	2.76988	0.208216	0.804998	5.00659	0.111215	0.455006	0.53317	0.51813	4	0.648702	5.1773e-06	0.51773	7.75515	0.526111	1	A/C/M	0.349992	-1.26	0	2	2	2	Intron (ENSSSCT00000004618.4/ENSSSCG00000004179.4, intron 5 of 8)	1	30961564	30970544	8981	1	ENSSSCT00000004618.4	6856	ENSSSCG00000004179	ENSSSCG00000004179
chr1:30999489	chr1	30999489	S1_30999489	G	A	G	A	0.71429	0.28571	0	2	0.28571	A	0.1667	0.375	G	2	0.104314	0.903315	-0.219398	0.202898	0.675728	0.221459	0.0344224	0.861839	5	0.0495713	1.0193	0.567022	13.6368	0.987256	1	A/G/R	-0.440857	-0.00206157	0	1	4	2	Promoter (<=1kb)	1	31000254	31059345	59092	1	ENSSSCT00000004620.4	-765	ENSSSCG00000004181	ENSSSCG00000004181
chr1:30999508	chr1	30999508	S1_30999508	G	T	T	G	0.57143	0.42857	0	4	0.57143	G	0.1667	0.625	T	2	33840.8	3.49243e-09	0.481447	2.137	0.217594	1.33144	16.3434	0.0155693	5	0.999941	0.533794	5.33794e-06	9.5657	4.50164e-08	0.00031669	G/T/K	-0.849997	-1.81289	0	1	2	4	Promoter (<=1kb)	1	31000254	31059345	59092	1	ENSSSCT00000004620.4	-746	ENSSSCG00000004181	ENSSSCG00000004181
chr1:30999513	chr1	30999513	S1_30999513	G	A	G	A	0.64286	0.35714	0	3	0.42857	A	0.5	0.25	G	2	18281.1	1.19664e-08	-0.361941	0.37358	0.574088	1.21194	4.18849	0.110117	5	0.999891	0.988077	9.88077e-06	11.3533	8.89569e-08	0.0010851	A/G/R	-1.57388	-0.849996	0	1	3	3	Promoter (<=1kb)	1	31000254	31059345	59092	1	ENSSSCT00000004620.4	-741	ENSSSCG00000004181	ENSSSCG00000004181
chr1:31214528	chr1	31214528	S1_31214528	T	G	T	G	0.71429	0.28571	0	2	0.28571	G	0.1667	0.375	T	2	0.104314	0.903315	-0.219398	0.202898	0.675728	0.221459	0.0344224	0.861839	5	0.0495713	1.0193	0.567022	13.6368	0.987256	1	G/T/K	-0.440857	-0.00206157	0	1	4	2	Intron (ENSSSCT00000074966.1/ENSSSCG00000004190.4, intron 3 of 9)	1	31184989	31243071	58083	1	ENSSSCT00000080051.1	29539	ENSSSCG00000004190	ENSSSCG00000004190
chr1:31214659	chr1	31214659	S1_31214659	G	T	G	T	0.71429	0.28571	0	2	0.28571	T	0.1667	0.375	G	2	0.104314	0.903315	0.219398	0.202898	0.675728	0.221459	0.0344224	0.861839	5	0.0495713	1.0193	0.567022	13.6368	0.987256	1	G/T/K	-0.00206157	-0.440857	0	4	1	2	Intron (ENSSSCT00000074966.1/ENSSSCG00000004190.4, intron 3 of 9)	1	31184989	31243071	58083	1	ENSSSCT00000080051.1	29670	ENSSSCG00000004190	ENSSSCG00000004190
chr1:31296406	chr1	31296406	S1_31296406	A	G	A	G	0.64286	0.35714	0	3	0.42857	G	0.3333	0.375	A	2	15750.4	1.612e-08	-0.425002	31500.7	6.04531e-09	-0.501339	0.283502	0.622618	5	0.999873	1.14681	1.14681e-05	12.5569	9.61171e-08	0.00146175	A/G/R	0.0763376	0.926341	0	3	1	3	Intron (ENSSSCT00000004630.4/ENSSSCG00000004191.4, intron 2 of 13)	1	31282506	31369408	86903	1	ENSSSCT00000004630.4	13900	ENSSSCG00000004191	ENSSSCG00000004191
chr1:31515990	chr1	31515990	S1_31515990	A	G	A	G	0.57143	0.42857	0	4	0.57143	G	0.5	0.375	A	2	24170.4	6.84573e-09	0.318883	0.383389	0.569319	1.16889	5.15131	0.0857608	5	0.999917	0.747343	7.47343e-06	10.3541	6.87827e-08	0.000620764	A/G/R	-0.850009	-1.48777	0	2	1	4	Distal Intergenic	1	31673798	31677696	3899	1	ENSSSCT00000059782.2	-157808	ENSSSCG00000004192	ENSSSCG00000004192
chr1:31516008	chr1	31516008	S1_31516008	T	C	T	C	0.71429	0.28571	0	2	0.28571	C	0.5	0.125	T	2	13578.2	2.16895e-08	-0.421278	0.375927	0.572939	1.27126	3.42309	0.137964	5	0.999853	1.33025	1.33025e-05	12.6605	1.19547e-07	0.00196678	C/T/Y	-1.69254	-0.849981	0	1	4	2	Distal Intergenic	1	31673798	31677696	3899	1	ENSSSCT00000059782.2	-157790	ENSSSCG00000004192	ENSSSCG00000004192
chr1:31516026	chr1	31516026	S1_31516026	T	C	T	C	0.71429	0.28571	0	2	0.28571	C	0.5	0.125	T	2	13578.2	2.16895e-08	-0.421278	0.375927	0.572939	1.27126	3.42309	0.137964	5	0.999853	1.33025	1.33025e-05	12.6605	1.19547e-07	0.00196678	C/T/Y	-1.69254	-0.849981	0	1	4	2	Distal Intergenic	1	31673798	31677696	3899	1	ENSSSCT00000059782.2	-157772	ENSSSCG00000004192	ENSSSCG00000004192
chr1:31516064	chr1	31516064	S1_31516064	G	A	G	A	0.71429	0.28571	0	2	0.28571	A	0.5	0.125	G	2	13578.2	2.16895e-08	-0.421278	0.375927	0.572939	1.27126	3.42309	0.137964	5	0.999853	1.33025	1.33025e-05	12.6605	1.19547e-07	0.00196678	A/G/R	-1.69254	-0.849981	0	1	4	2	Distal Intergenic	1	31673798	31677696	3899	1	ENSSSCT00000059782.2	-157734	ENSSSCG00000004192	ENSSSCG00000004192
chr1:31516065	chr1	31516065	S1_31516065	C	A	C	A	0.71429	0.28571	0	2	0.28571	A	0.5	0.125	C	2	13578.2	2.16895e-08	-0.421278	0.375927	0.572939	1.27126	3.42309	0.137964	5	0.999853	1.33025	1.33025e-05	12.6605	1.19547e-07	0.00196678	A/C/M	-1.69254	-0.849981	0	1	4	2	Distal Intergenic	1	31673798	31677696	3899	1	ENSSSCT00000059782.2	-157733	ENSSSCG00000004192	ENSSSCG00000004192
chr1:31674705	chr1	31674705	S1_31674705	C	G	C	G	0.64286	0.35714	0	3	0.42857	G	0.5	0.25	C	2	15882.6	1.58529e-08	0.378223	0.354429	0.583664	1.22821	3.73739	0.125349	5	0.999874	1.13727	1.13727e-05	11.9158	9.61171e-08	0.00143753	C/G/S	-0.849989	-1.60643	0	3	1	3	Promoter (<=1kb)	1	31674396	31677696	3301	1	ENSSSCT00000004631.4	309	ENSSSCG00000004192	ENSSSCG00000004192
chr1:31704122	chr1	31704122	S1_31704122	T	C	T	C	0.64286	0.35714	0	3	0.42857	C	0.5	0.25	T	2	15882.6	1.58529e-08	-0.378223	0.354429	0.583664	1.22821	3.73739	0.125349	5	0.999874	1.13727	1.13727e-05	11.9158	9.61171e-08	0.00143753	C/T/Y	-1.60643	-0.849989	0	1	3	3	Distal Intergenic	1	31674396	31677696	3301	1	ENSSSCT00000004631.4	29726	ENSSSCG00000004192	ENSSSCG00000004192
chr1:31704146	chr1	31704146	S1_31704146	C	T	C	T	0.64286	0.35714	0	3	0.42857	T	0.5	0.25	C	2	15882.6	1.58529e-08	0.378223	0.354429	0.583664	1.22821	3.73739	0.125349	5	0.999874	1.13727	1.13727e-05	11.9158	9.61171e-08	0.00143753	C/T/Y	-0.849989	-1.60643	0	3	1	3	Distal Intergenic	1	31674396	31677696	3301	1	ENSSSCT00000004631.4	29750	ENSSSCG00000004192	ENSSSCG00000004192
chr1:31938859	chr1	31938859	S1_31938859	A	G	A	G	0.6	0.4	0.28571	2	0.4	G	0.25	0.5	A	2	0.610717	0.620842	-0.860078	1.19536	0.388369	-0.541685	0.232627	0.677209	3	0.378823	0.723596	0.59531	6.36697	0.842875	1	A/G/R	-0.318393	1.40176	0	2	1	2	Intron (ENSSSCT00000033751.3/ENSSSCG00000025992.3, intron 3 of 27)	1	31859951	31959879	99929	2	ENSSSCT00000033751.3	21020	ENSSSCG00000025992	ENSSSCG00000025992
chr1:31938917	chr1	31938917	S1_31938917	C	T	T	C	0.6	0.4	0.28571	2	0.4	C	0.25	0.5	T	2	0.610717	0.620842	0.860078	1.19536	0.388369	-0.541685	0.232627	0.677209	3	0.378823	0.723596	0.59531	6.36697	0.842875	1	C/T/Y	1.40176	-0.318393	0	1	2	2	Intron (ENSSSCT00000033751.3/ENSSSCG00000025992.3, intron 3 of 27)	1	31859951	31959879	99929	2	ENSSSCT00000033751.3	20962	ENSSSCG00000025992	ENSSSCG00000025992
chr1:32041579	chr1	32041579	S1_32041579	G	A	A	G	0.5	0.5	0	3	0.42857	A	0.8333	0.25	G	2	2.94392	0.163651	-0.987497	5.19136	0.0849311	0.552504	0.696476	0.450913	5	0.595462	7.51355e-06	0.751355	10.208	0.506024	1	A/G/R	-1.54	0.434992	0	2	2	3	Intron (ENSSSCT00000076361.1/ENSSSCG00000043973.1, intron 1 of 2)	1	32037232	32051376	14145	2	ENSSSCT00000076361.1	9797	ENSSSCG00000043973	ENSSSCG00000043973
chr1:32041595	chr1	32041595	S1_32041595	T	C	C	T	0.5	0.5	0	3	0.42857	C	0.8333	0.25	T	2	2.94392	0.163651	-0.987497	5.19136	0.0849311	0.552504	0.696476	0.450913	5	0.595462	7.51355e-06	0.751355	10.208	0.506024	1	C/T/Y	-1.54	0.434992	0	2	2	3	Intron (ENSSSCT00000076361.1/ENSSSCG00000043973.1, intron 1 of 2)	1	32037232	32051376	14145	2	ENSSSCT00000076361.1	9781	ENSSSCG00000043973	ENSSSCG00000043973
chr1:32041629	chr1	32041629	S1_32041629	C	T	C	T	0.5	0.5	0	3	0.42857	T	0.8333	0.25	C	2	2.94392	0.163651	0.987497	5.19136	0.0849311	0.552504	0.696476	0.450913	5	0.595462	7.51355e-06	0.751355	10.208	0.506024	1	C/T/Y	0.434992	-1.54	0	2	2	3	Intron (ENSSSCT00000076361.1/ENSSSCG00000043973.1, intron 1 of 2)	1	32037232	32051376	14145	2	ENSSSCT00000076361.1	9747	ENSSSCG00000043973	ENSSSCG00000043973
chr1:32041641	chr1	32041641	S1_32041641	A	G	A	G	0.5	0.5	0	3	0.42857	G	0.8333	0.25	A	2	2.94392	0.163651	0.987497	5.19136	0.0849311	0.552504	0.696476	0.450913	5	0.595462	7.51355e-06	0.751355	10.208	0.506024	1	A/G/R	0.434992	-1.54	0	2	2	3	Intron (ENSSSCT00000076361.1/ENSSSCG00000043973.1, intron 1 of 2)	1	32037232	32051376	14145	2	ENSSSCT00000076361.1	9735	ENSSSCG00000043973	ENSSSCG00000043973
chr1:32084449	chr1	32084449	S1_32084449	C	T	C	T	0.64286	0.35714	0	1	0.14286	T	0	0.625	C	2	23039.5	7.53421e-09	-0.505385	1.86053	0.244273	1.35538	13.3808	0.0216188	5	0.999913	0.784023	7.84023e-06	11.2522	7.275e-08	0.000683195	C/T/Y	-1.86076	-0.849994	0	4	2	1	Distal Intergenic	1	32037232	32051376	14145	2	ENSSSCT00000076361.1	-33073	ENSSSCG00000043973	ENSSSCG00000043973
chr1:32098096	chr1	32098096	S1_32098096	G	C	G	C	0.7	0.3	0.28571	1	0.2	C	0.75	0	G	2	10.8412	0.0844509	-0.990295	15.6146	0.058481	-0.631257	1.53891	0.340565	3	0.873274	0.166181	1.66181e-06	2.46577	0.296073	1	C/G/S	-0.359038	1.62155	0	1	3	1	Distal Intergenic	1	32037232	32051376	14145	2	ENSSSCT00000076361.1	-46720	ENSSSCG00000043973	ENSSSCG00000043973
chr1:32098147	chr1	32098147	S1_32098147	C	T	C	T	0.75	0.25	0.14286	1	0.16667	T	0.75	0	C	2	3.32281	0.173455	0.890364	4.84658	0.115011	-0.534221	0.419435	0.563364	4	0.68896	0.146471	0.344451	7.50966	0.510969	1	C/T/Y	1.42458	-0.356143	0	4	1	1	Distal Intergenic	1	32037232	32051376	14145	2	ENSSSCT00000076361.1	-46771	ENSSSCG00000043973	ENSSSCG00000043973
chr1:32309842	chr1	32309842	S1_32309842	T	A	T	A	0.7	0.3	0.28571	1	0.2	A	0.5	0.1667	T	2	1.91396	0.343176	-0.724803	2.08726	0.285385	1.91691	2.71876	0.240948	3	0.632575	0.662489	0.0145673	5.02	0.696766	1	A/T/W	-2.64172	-1.19211	0	1	3	1	Intron (ENSSSCT00000037683.2/ENSSSCG00000036790.2, intron 5 of 7)	1	32221664	32355407	133744	2	ENSSSCT00000056163.2	45565	ENSSSCG00000036790	ENSSSCG00000036790
chr1:32309843	chr1	32309843	S1_32309843	C	T	C	T	0.7	0.3	0.28571	1	0.2	T	0.5	0.1667	C	2	1.91396	0.343176	0.724803	2.08726	0.285385	1.91691	2.71876	0.240948	3	0.632575	0.662489	0.0145673	5.02	0.696766	1	C/T/Y	-1.19211	-2.64172	0	3	1	1	Intron (ENSSSCT00000037683.2/ENSSSCG00000036790.2, intron 5 of 7)	1	32221664	32355407	133744	2	ENSSSCT00000056163.2	45564	ENSSSCG00000036790	ENSSSCG00000036790
chr1:32309865	chr1	32309865	S1_32309865	T	C	T	C	0.7	0.3	0.28571	1	0.2	C	0.5	0.1667	T	2	1.91396	0.343176	-0.724803	2.08726	0.285385	1.91691	2.71876	0.240948	3	0.632575	0.662489	0.0145673	5.02	0.696766	1	C/T/Y	-2.64172	-1.19211	0	1	3	1	Intron (ENSSSCT00000037683.2/ENSSSCG00000036790.2, intron 5 of 7)	1	32221664	32355407	133744	2	ENSSSCT00000056163.2	45542	ENSSSCG00000036790	ENSSSCG00000036790
chr1:32309883	chr1	32309883	S1_32309883	T	A	T	A	0.7	0.3	0.28571	1	0.2	A	0.5	0.1667	T	2	1.91396	0.343176	-0.724803	2.08726	0.285385	1.91691	2.71876	0.240948	3	0.632575	0.662489	0.0145673	5.02	0.696766	1	A/T/W	-2.64172	-1.19211	0	1	3	1	Intron (ENSSSCT00000037683.2/ENSSSCG00000036790.2, intron 5 of 7)	1	32221664	32355407	133744	2	ENSSSCT00000056163.2	45524	ENSSSCG00000036790	ENSSSCG00000036790
chr1:32362963	chr1	32362963	S1_32362963	C	T	C	T	0.57143	0.42857	0	4	0.57143	T	0.1667	0.625	C	2	33840.8	3.49243e-09	-0.481447	2.137	0.217594	1.33144	16.3434	0.0155693	5	0.999941	0.533794	5.33794e-06	9.5657	4.50164e-08	0.00031669	C/T/Y	-1.81289	-0.849997	0	2	1	4	Promoter (<=1kb)	1	32221065	32362001	140937	2	ENSSSCT00000037683.2	-962	ENSSSCG00000036790	ENSSSCG00000036790
chr1:32430586	chr1	32430586	S1_32430586	C	T	C	T	0.57143	0.42857	0	2	0.28571	T	0.1667	0.625	C	2	0.795415	0.511879	-0.65916	1.56946	0.278527	0.00916686	8.92747e-05	0.992914	5	0.284543	1.32883e-05	1.32883	12.4888	0.782598	1	C/T/Y	-0.668327	0.649993	0	3	2	2	Intron (ENSSSCT00000004640.3/ENSSSCG00000004199.4, intron 1 of 19)	1	32418778	32630643	211866	1	ENSSSCT00000040415.2	11808	ENSSSCG00000004199	ENSSSCG00000004199
chr1:32430648	chr1	32430648	S1_32430648	C	T	C	T	0.5	0.5	0	3	0.42857	C	0.1667	0.75	T	2	2.94392	0.163651	0.987497	5.19136	0.0849311	0.552504	0.696476	0.450913	5	0.595462	7.51355e-06	0.751355	10.208	0.506024	1	C/T/Y	0.434992	-1.54	0	2	2	3	Intron (ENSSSCT00000004640.3/ENSSSCG00000004199.4, intron 1 of 19)	1	32418778	32630643	211866	1	ENSSSCT00000040415.2	11870	ENSSSCG00000004199	ENSSSCG00000004199
chr1:32939780	chr1	32939780	S1_32939780	G	T	G	T	0.64286	0.35714	0	3	0.42857	T	0.5	0.25	G	2	0.843893	0.494576	0.733842	1.22269	0.330861	1.03866	1.07201	0.35898	5	0.296739	0.825001	0.36441	11.5059	0.781202	1	G/T/K	-0.304814	-1.7725	0	3	1	3	Distal Intergenic	1	32961754	33033019	71266	2	ENSSSCT00000004642.3	93239	ENSSSCG00000004201	ENSSSCG00000004201
chr1:32939848	chr1	32939848	S1_32939848	T	C	T	C	0.64286	0.35714	0	3	0.42857	C	0.5	0.25	T	2	0.843893	0.494576	-0.733842	1.22269	0.330861	1.03866	1.07201	0.35898	5	0.296739	0.825001	0.36441	11.5059	0.781202	1	C/T/Y	-1.7725	-0.304814	0	1	3	3	Distal Intergenic	1	32961754	33033019	71266	2	ENSSSCT00000004642.3	93171	ENSSSCG00000004201	ENSSSCG00000004201
chr1:32939849	chr1	32939849	S1_32939849	G	A	G	A	0.71429	0.28571	0	2	0.28571	A	0.5	0.125	G	2	0.966592	0.454511	-0.878738	1.8967	0.240494	0.358832	0.118702	0.747799	5	0.325826	0.791563	0.348844	11.3888	0.769888	1	A/G/R	-1.23757	0.519906	0	1	4	2	Distal Intergenic	1	32961754	33033019	71266	2	ENSSSCT00000004642.3	93170	ENSSSCG00000004201	ENSSSCG00000004201
chr1:32953759	chr1	32953759	S1_32953759	T	C	T	C	0.64286	0.35714	0	3	0.42857	C	0.5	0.25	T	2	0.843893	0.494576	-0.733842	1.22269	0.330861	1.03866	1.07201	0.35898	5	0.296739	0.825001	0.36441	11.5059	0.781202	1	C/T/Y	-1.7725	-0.304814	0	1	3	3	Distal Intergenic	1	32961754	33033019	71266	2	ENSSSCT00000004642.3	79260	ENSSSCG00000004201	ENSSSCG00000004201
chr1:32953801	chr1	32953801	S1_32953801	A	G	A	G	0.64286	0.35714	0	3	0.42857	G	0.5	0.25	A	2	0.843893	0.494576	0.733842	1.22269	0.330861	1.03866	1.07201	0.35898	5	0.296739	0.825001	0.36441	11.5059	0.781202	1	A/G/R	-0.304814	-1.7725	0	3	1	3	Distal Intergenic	1	32961754	33033019	71266	2	ENSSSCT00000004642.3	79218	ENSSSCG00000004201	ENSSSCG00000004201
chr1:32982586	chr1	32982586	S1_32982586	C	G	C	G	0.64286	0.35714	0	3	0.42857	G	0.3333	0.375	C	2	9.16464	0.03209	-0.0883322	0.070353	0.803932	1.83833	15.2357	0.0174927	5	0.820863	3.32714e-06	0.332714	6.94967	0.135596	1	C/G/S	-1.92666	-1.75	0	3	1	3	Intron (ENSSSCT00000004642.3/ENSSSCG00000004201.3, intron 1 of 1)	1	32961754	33033019	71266	2	ENSSSCT00000004642.3	50433	ENSSSCG00000004201	ENSSSCG00000004201
chr1:33032871	chr1	33032871	S1_33032871	A	C	C	A	0.57143	0.42857	0	2	0.28571	A	0.3333	0.5	C	2	2.21156	0.225515	0.489138	1.24999	0.326166	0.738657	1.34429	0.310775	5	0.525116	0.551223	0.250353	10.6514	0.541363	1	A/C/M	-0.24952	-1.2278	0	2	3	2	Promoter (<=1kb)	1	32961754	33033019	71266	2	ENSSSCT00000004642.3	148	ENSSSCG00000004201	ENSSSCG00000004201
chr1:33032888	chr1	33032888	S1_33032888	G	A	G	A	0.64286	0.35714	0	1	0.14286	A	0.6667	0.125	G	2	2.45579	0.20147	-0.774082	3.97177	0.117058	1.26934	1.47314	0.291614	5	0.551146	0.406121	0.336876	9.8695	0.526111	1	A/G/R	-2.04342	-0.495253	0	2	4	1	Promoter (<=1kb)	1	32961754	33033019	71266	2	ENSSSCT00000004642.3	131	ENSSSCG00000004201	ENSSSCG00000004201
chr1:33033037	chr1	33033037	S1_33033037	A	G	A	G	0.57143	0.42857	0	2	0.28571	G	0.3333	0.5	A	2	2.21156	0.225515	-0.489138	1.24999	0.326166	0.738657	1.34429	0.310775	5	0.525116	0.551223	0.250353	10.6514	0.541363	1	A/G/R	-1.2278	-0.24952	0	3	2	2	Promoter (<=1kb)	1	32961754	33033019	71266	2	ENSSSCT00000004642.3	-18	ENSSSCG00000004201	ENSSSCG00000004201
chr1:33033047	chr1	33033047	S1_33033047	G	T	G	T	0.64286	0.35714	0	1	0.14286	T	0.6667	0.125	G	2	2.45579	0.20147	0.774082	3.97177	0.117058	1.26934	1.47314	0.291614	5	0.551146	0.406121	0.336876	9.8695	0.526111	1	G/T/K	-0.495253	-2.04342	0	4	2	1	Promoter (<=1kb)	1	32961754	33033019	71266	2	ENSSSCT00000004642.3	-28	ENSSSCG00000004201	ENSSSCG00000004201
chr1:33103110	chr1	33103110	S1_33103110	A	T	A	T	0.57143	0.42857	0	2	0.28571	T	0.6667	0.25	A	2	36311.9	3.0333e-09	0.621041	3.81556	0.122486	1.47104	21.4062	0.00983162	5	0.999945	0.497471	4.97471e-06	8.87835	3.98046e-08	0.000275057	A/T/W	-0.849996	-2.09208	0	3	2	2	Distal Intergenic	1	33146531	33181786	35256	1	ENSSSCT00000065444.2	-43421	ENSSSCG00000004202	ENSSSCG00000004202
chr1:33103115	chr1	33103115	S1_33103115	G	A	G	A	0.57143	0.42857	0	2	0.28571	A	0.6667	0.25	G	2	36311.9	3.0333e-09	-0.621041	3.81556	0.122486	1.47104	21.4062	0.00983162	5	0.999945	0.497471	4.97471e-06	8.87835	3.98046e-08	0.000275057	A/G/R	-2.09208	-0.849996	0	2	3	2	Distal Intergenic	1	33146531	33181786	35256	1	ENSSSCT00000065444.2	-43416	ENSSSCG00000004202	ENSSSCG00000004202
chr1:33215656	chr1	33215656	S1_33215656	C	T	C	T	0.5	0.5	0	3	0.42857	T	0.6667	0.375	C	2	20.6143	0.0078216	0.417501	4.2446	0.108423	1.8825	36.984	0.00369514	5	0.91156	1.64261e-06	0.164261	4.12635	0.0358427	1	C/T/Y	-1.465	-2.3	0	2	2	3	Intron (ENSSSCT00000004644.4/ENSSSCG00000004203.4, intron 18 of 20)	1	33149197	33195550	46354	1	ENSSSCT00000057193.2	66459	ENSSSCG00000004202	ENSSSCG00000004202
chr1:33215756	chr1	33215756	S1_33215756	C	A	A	C	0.5	0.5	0.14286	2	0.33333	C	0.3333	0.6667	A	2	3.40757	0.168981	-0.732525	2.61594	0.204221	1.2505	3.63609	0.152598	4	0.00072162	0.629516	6.29516e-06	8.98257	0.510969	1	A/C/M	-1.98303	-0.517976	0	2	2	2	Intron (ENSSSCT00000004644.4/ENSSSCG00000004203.4, intron 18 of 20)	1	33149197	33195550	46354	1	ENSSSCT00000057193.2	66559	ENSSSCG00000004202	ENSSSCG00000004202
chr1:33215760	chr1	33215760	S1_33215760	T	C	C	T	0.5	0.5	0.14286	2	0.33333	T	0.3333	0.6667	C	2	3.40757	0.168981	-0.732525	2.61594	0.204221	1.2505	3.63609	0.152598	4	0.00072162	0.629516	6.29516e-06	8.98257	0.510969	1	C/T/Y	-1.98303	-0.517976	0	2	2	2	Intron (ENSSSCT00000004644.4/ENSSSCG00000004203.4, intron 18 of 20)	1	33149197	33195550	46354	1	ENSSSCT00000057193.2	66563	ENSSSCG00000004202	ENSSSCG00000004202
chr1:33215769	chr1	33215769	S1_33215769	T	A	A	T	0.5	0.5	0.14286	2	0.33333	T	0.3333	0.6667	A	2	3.40757	0.168981	-0.732525	2.61594	0.204221	1.2505	3.63609	0.152598	4	0.00072162	0.629516	6.29516e-06	8.98257	0.510969	1	A/T/W	-1.98303	-0.517976	0	2	2	2	Intron (ENSSSCT00000004644.4/ENSSSCG00000004203.4, intron 18 of 20)	1	33149197	33195550	46354	1	ENSSSCT00000057193.2	66572	ENSSSCG00000004202	ENSSSCG00000004202
chr1:33215783	chr1	33215783	S1_33215783	G	A	A	G	0.5	0.5	0.14286	2	0.33333	G	0.3333	0.6667	A	2	3.40757	0.168981	-0.732525	2.61594	0.204221	1.2505	3.63609	0.152598	4	0.00072162	0.629516	6.29516e-06	8.98257	0.510969	1	A/G/R	-1.98303	-0.517976	0	2	2	2	Intron (ENSSSCT00000004644.4/ENSSSCG00000004203.4, intron 18 of 20)	1	33149197	33195550	46354	1	ENSSSCT00000057193.2	66586	ENSSSCG00000004202	ENSSSCG00000004202
chr1:33364856	chr1	33364856	S1_33364856	G	T	G	T	0.5	0.5	0	3	0.42857	T	0.6667	0.375	G	2	20.6143	0.0078216	0.417501	4.2446	0.108423	1.8825	36.984	0.00369514	5	0.91156	1.64261e-06	0.164261	4.12635	0.0358427	1	G/T/K	-1.465	-2.3	0	2	2	3	Distal Intergenic	1	33198301	33319367	121067	2	ENSSSCT00000004644.4	-45489	ENSSSCG00000004203	ENSSSCG00000004203
chr1:33386046	chr1	33386046	S1_33386046	C	T	C	T	0.7	0.3	0.28571	1	0.2	T	0.3333	0.25	C	2	0.632107	0.612705	0.1138	0.0185277	0.904194	1.42714	1.20816	0.386332	3	0.347877	1.74897	1.74897e-05	7.45568	0.835795	1	C/T/Y	-1.31334	-1.54094	0	3	1	1	Distal Intergenic	1	33198301	33319367	121067	2	ENSSSCT00000004644.4	-66679	ENSSSCG00000004203	ENSSSCG00000004203
chr1:33403216	chr1	33403216	S1_33403216	A	G	A	G	0.64286	0.35714	0	3	0.42857	G	0.1667	0.5	A	2	14610.8	1.87324e-08	-0.0350642	0.00579728	0.942964	0.885057	3.69338	0.127005	5	0.999863	1.23625	1.23625e-05	12.9765	1.06351e-07	0.00169864	A/G/R	-0.920121	-0.849993	0	3	1	3	Distal Intergenic	1	33470397	33490405	20009	1	ENSSSCT00000004645.4	-67181	ENSSSCG00000004204	ENSSSCG00000004204
chr1:33403362	chr1	33403362	S1_33403362	C	T	C	T	0.58333	0.41667	0.14286	1	0.16667	T	0.5	0.375	C	2	14359	1.06753e-06	0.424997	28717.7	4.53098e-07	0.97521	0.444977	0.552452	4	0.999896	1.25793	1.25793e-05	10.3436	5.10564e-06	0.0968029	C/T/Y	-0.550212	-1.40021	0	3	2	1	Distal Intergenic	1	33470397	33490405	20009	1	ENSSSCT00000004645.4	-67035	ENSSSCG00000004204	ENSSSCG00000004204
chr1:33503775	chr1	33503775	S1_33503775	G	T	G	T	0.57143	0.42857	0	2	0.28571	T	0.6667	0.25	G	2	36311.9	3.0333e-09	0.621041	3.81556	0.122486	1.47104	21.4062	0.00983162	5	0.999945	0.497471	4.97471e-06	8.87835	3.98046e-08	0.000275057	G/T/K	-0.849996	-2.09208	0	3	2	2	Distal Intergenic	1	33527734	33717977	190244	1	ENSSSCT00000047609.2	-23959	ENSSSCG00000004205	ENSSSCG00000004205
chr1:33503782	chr1	33503782	S1_33503782	C	T	C	T	0.57143	0.42857	0	2	0.28571	T	0.6667	0.25	C	2	36311.9	3.0333e-09	0.621041	3.81556	0.122486	1.47104	21.4062	0.00983162	5	0.999945	0.497471	4.97471e-06	8.87835	3.98046e-08	0.000275057	C/T/Y	-0.849996	-2.09208	0	3	2	2	Distal Intergenic	1	33527734	33717977	190244	1	ENSSSCT00000047609.2	-23952	ENSSSCG00000004205	ENSSSCG00000004205
chr1:33503831	chr1	33503831	S1_33503831	A	G	A	G	0.57143	0.42857	0	2	0.28571	G	0.6667	0.25	A	2	36311.9	3.0333e-09	0.621041	3.81556	0.122486	1.47104	21.4062	0.00983162	5	0.999945	0.497471	4.97471e-06	8.87835	3.98046e-08	0.000275057	A/G/R	-0.849996	-2.09208	0	3	2	2	Distal Intergenic	1	33527734	33717977	190244	1	ENSSSCT00000047609.2	-23903	ENSSSCG00000004205	ENSSSCG00000004205
chr1:33503837	chr1	33503837	S1_33503837	A	G	A	G	0.57143	0.42857	0	2	0.28571	G	0.6667	0.25	A	2	36311.9	3.0333e-09	0.621041	3.81556	0.122486	1.47104	21.4062	0.00983162	5	0.999945	0.497471	4.97471e-06	8.87835	3.98046e-08	0.000275057	A/G/R	-0.849996	-2.09208	0	3	2	2	Distal Intergenic	1	33527734	33717977	190244	1	ENSSSCT00000047609.2	-23897	ENSSSCG00000004205	ENSSSCG00000004205
chr1:33503859	chr1	33503859	S1_33503859	T	C	T	C	0.57143	0.42857	0	2	0.28571	C	0.6667	0.25	T	2	36311.9	3.0333e-09	-0.621041	3.81556	0.122486	1.47104	21.4062	0.00983162	5	0.999945	0.497471	4.97471e-06	8.87835	3.98046e-08	0.000275057	C/T/Y	-2.09208	-0.849996	0	2	3	2	Distal Intergenic	1	33527734	33717977	190244	1	ENSSSCT00000047609.2	-23875	ENSSSCG00000004205	ENSSSCG00000004205
chr1:33503888	chr1	33503888	S1_33503888	A	G	A	G	0.57143	0.42857	0	2	0.28571	G	0.6667	0.25	A	2	36311.9	3.0333e-09	0.621041	3.81556	0.122486	1.47104	21.4062	0.00983162	5	0.999945	0.497471	4.97471e-06	8.87835	3.98046e-08	0.000275057	A/G/R	-0.849996	-2.09208	0	3	2	2	Distal Intergenic	1	33527734	33717977	190244	1	ENSSSCT00000047609.2	-23846	ENSSSCG00000004205	ENSSSCG00000004205
chr1:33522722	chr1	33522722	S1_33522722	G	A	G	A	0.64286	0.35714	0	1	0.14286	A	0.6667	0.125	G	2	2.45579	0.20147	-0.774082	3.97177	0.117058	1.26934	1.47314	0.291614	5	0.551146	0.406121	0.336876	9.8695	0.526111	1	A/G/R	-2.04342	-0.495253	0	2	4	1	Distal Intergenic	1	33527734	33717977	190244	1	ENSSSCT00000047609.2	-5012	ENSSSCG00000004205	ENSSSCG00000004205
chr1:33522755	chr1	33522755	S1_33522755	T	C	T	C	0.64286	0.35714	0	1	0.14286	C	0.6667	0.125	T	2	2.45579	0.20147	-0.774082	3.97177	0.117058	1.26934	1.47314	0.291614	5	0.551146	0.406121	0.336876	9.8695	0.526111	1	C/T/Y	-2.04342	-0.495253	0	2	4	1	Distal Intergenic	1	33527734	33717977	190244	1	ENSSSCT00000047609.2	-4979	ENSSSCG00000004205	ENSSSCG00000004205
chr1:33522829	chr1	33522829	S1_33522829	T	C	T	C	0.58333	0.41667	0.14286	1	0.16667	C	0.6667	0.1667	T	2	2.95042	0.195675	-0.882027	5.22409	0.106383	1.18741	1.19256	0.354666	4	0.000688991	0.694182	6.94182e-06	9.07571	0.526111	1	C/T/Y	-2.06944	-0.305384	0	2	3	1	Distal Intergenic	1	33527734	33717977	190244	1	ENSSSCT00000047609.2	-4905	ENSSSCG00000004205	ENSSSCG00000004205
chr1:33582120	chr1	33582120	S1_33582120	C	A	C	A	0.57143	0.42857	0	2	0.28571	A	0.6667	0.25	C	2	8.98595	0.0331425	-0.606667	5.22466	0.0842505	1.85833	14.4186	0.01915	5	0.817949	3.38126e-06	0.338126	7.0142	0.139245	1	A/C/M	-2.465	-1.25167	0	2	3	2	Promoter (1-2kb)	1	33583387	33682462	99076	1	ENSSSCT00000068000.1	-1267	ENSSSCG00000004205	ENSSSCG00000004205
chr1:33598857	chr1	33598857	S1_33598857	G	A	G	A	0.64286	0.35714	0	1	0.14286	A	0.6667	0.125	G	2	2.45579	0.20147	-0.774082	3.97177	0.117058	1.26934	1.47314	0.291614	5	0.551146	0.406121	0.336876	9.8695	0.526111	1	A/G/R	-2.04342	-0.495253	0	2	4	1	Intron (ENSSSCT00000047609.2/ENSSSCG00000004205.4, intron 1 of 14)	1	33583451	33717966	134516	1	ENSSSCT00000004647.4	15406	ENSSSCG00000004205	ENSSSCG00000004205
chr1:33606146	chr1	33606146	S1_33606146	G	A	G	A	0.57143	0.42857	0	2	0.28571	A	0.3333	0.5	G	2	19122.7	1.09363e-08	0.137149	0.116076	0.750472	0.987153	6.0132	0.07028	5	0.999895	0.944593	9.44593e-06	11.6125	8.89569e-08	0.00099169	A/G/R	-0.850005	-1.1243	0	2	3	2	Intron (ENSSSCT00000047609.2/ENSSSCG00000004205.4, intron 1 of 14)	1	33583451	33717966	134516	1	ENSSSCT00000004647.4	22695	ENSSSCG00000004205	ENSSSCG00000004205
chr1:33640065	chr1	33640065	S1_33640065	G	A	G	A	0.6	0.4	0.28571	2	0.4	A	0	0.5	G	2	99049.9	1.00958e-05	0.425002	198093	5.0481e-06	1.10483	5.27674	0.148442	3	0.999989	0.182366	1.82366e-06	2.53195	4.78157e-05	0.915479	A/G/R	-0.679832	-1.52983	0	1	2	2	Intron (ENSSSCT00000047609.2/ENSSSCG00000004205.4, intron 1 of 14)	1	33631669	33717967	86299	1	ENSSSCT00000064357.2	8396	ENSSSCG00000004205	ENSSSCG00000004205
chr1:33704786	chr1	33704786	S1_33704786	C	T	C	T	0.5	0.5	0	3	0.42857	T	0.6667	0.375	C	2	20.6143	0.0078216	0.417501	4.2446	0.108423	1.8825	36.984	0.00369514	5	0.91156	1.64261e-06	0.164261	4.12635	0.0358427	1	C/T/Y	-1.465	-2.3	0	2	2	3	Intron (ENSSSCT00000047609.2/ENSSSCG00000004205.4, intron 12 of 14)	1	33631669	33717967	86299	1	ENSSSCT00000064357.2	73117	ENSSSCG00000004205	ENSSSCG00000004205
chr1:33743386	chr1	33743386	S1_33743386	G	C	C	G	0.57143	0.42857	0	2	0.28571	G	0.3333	0.5	C	2	2.82273	0.171978	-0.0891644	0.0495449	0.834761	1.71917	5.41712	0.0804747	5	0.585297	7.70234e-06	0.770234	10.3073	0.510969	1	C/G/S	-1.80833	-1.63	0	3	2	2	Distal Intergenic	1	33631669	33717967	86299	1	ENSSSCT00000064357.2	111717	ENSSSCG00000004205	ENSSSCG00000004205
chr1:35377760	chr1	35377760	S1_35377760	C	T	C	T	0.78571	0.21429	0	1	0.14286	T	0.5	0	C	2	0.696787	0.550005	0.495693	0.564085	0.49439	-0.877804	0.409125	0.557209	5	0.258377	0.90728	0.358417	11.758	0.804068	1	C/T/Y	1.3735	0.38211	0	5	1	1	Intron (ENSSSCT00000042817.2/ENSSSCG00000024392.3, intron 2 of 7)	1	35333465	35519870	186406	1	ENSSSCT00000030479.3	44295	ENSSSCG00000024392	ENSSSCG00000024392
chr1:35377816	chr1	35377816	S1_35377816	C	T	C	T	0.5	0.5	0	1	0.14286	C	0.8333	0.25	T	2	9.61681	0.0296406	-0.901664	15.2548	0.0174565	-1.21833	3.97879	0.116823	5	0.827836	3.19764e-06	0.319764	6.79086	0.126418	1	C/T/Y	0.316669	2.12	0	3	3	1	Intron (ENSSSCT00000042817.2/ENSSSCG00000024392.3, intron 2 of 7)	1	35333465	35519870	186406	1	ENSSSCT00000030479.3	44351	ENSSSCG00000024392	ENSSSCG00000024392
chr1:35377820	chr1	35377820	S1_35377820	T	G	G	T	0.5	0.5	0	1	0.14286	T	0.8333	0.25	G	2	9.61681	0.0296406	0.901664	15.2548	0.0174565	-1.21833	3.97879	0.116823	5	0.827836	3.19764e-06	0.319764	6.79086	0.126418	1	G/T/K	2.12	0.316669	0	3	3	1	Intron (ENSSSCT00000042817.2/ENSSSCG00000024392.3, intron 2 of 7)	1	35333465	35519870	186406	1	ENSSSCT00000030479.3	44355	ENSSSCG00000024392	ENSSSCG00000024392
chr1:35377823	chr1	35377823	S1_35377823	T	A	A	T	0.5	0.5	0	1	0.14286	T	0.8333	0.25	A	2	9.61681	0.0296406	0.901664	15.2548	0.0174565	-1.21833	3.97879	0.116823	5	0.827836	3.19764e-06	0.319764	6.79086	0.126418	1	A/T/W	2.12	0.316669	0	3	3	1	Intron (ENSSSCT00000042817.2/ENSSSCG00000024392.3, intron 2 of 7)	1	35333465	35519870	186406	1	ENSSSCT00000030479.3	44358	ENSSSCG00000024392	ENSSSCG00000024392
chr1:35377824	chr1	35377824	S1_35377824	C	A	A	C	0.5	0.5	0	1	0.14286	C	0.8333	0.25	A	2	9.61681	0.0296406	0.901664	15.2548	0.0174565	-1.21833	3.97879	0.116823	5	0.827836	3.19764e-06	0.319764	6.79086	0.126418	1	A/C/M	2.12	0.316669	0	3	3	1	Intron (ENSSSCT00000042817.2/ENSSSCG00000024392.3, intron 2 of 7)	1	35333465	35519870	186406	1	ENSSSCT00000030479.3	44359	ENSSSCG00000024392	ENSSSCG00000024392
chr1:35377951	chr1	35377951	S1_35377951	G	A	G	A	0.78571	0.21429	0	1	0.14286	A	0.1667	0.25	G	2	0.331601	0.735786	-0.268275	0.374606	0.573585	-0.569062	0.162233	0.707708	5	0.14222	0.991962	0.454952	13.3319	0.896851	1	A/G/R	0.300788	0.837337	0	1	5	1	Intron (ENSSSCT00000042817.2/ENSSSCG00000024392.3, intron 2 of 7)	1	35333465	35519870	186406	1	ENSSSCT00000030479.3	44486	ENSSSCG00000024392	ENSSSCG00000024392
chr1:35440726	chr1	35440726	S1_35440726	C	T	C	T	0.71429	0.28571	0	2	0.28571	T	0.1667	0.375	C	2	12646.3	2.50033e-08	0.138155	0.0756452	0.79691	0.711836	2.00812	0.22942	5	0.999842	1.42826	1.42826e-05	13.6425	1.30626e-07	0.00226727	C/T/Y	-0.573681	-0.849991	0	4	1	2	Intron (ENSSSCT00000042817.2/ENSSSCG00000024392.3, intron 5 of 7)	1	35333465	35519870	186406	1	ENSSSCT00000030479.3	107261	ENSSSCG00000024392	ENSSSCG00000024392
chr1:35440797	chr1	35440797	S1_35440797	G	T	G	T	0.71429	0.28571	0	2	0.28571	T	0.1667	0.375	G	2	12646.3	2.50033e-08	0.138155	0.0756452	0.79691	0.711836	2.00812	0.22942	5	0.999842	1.42826	1.42826e-05	13.6425	1.30626e-07	0.00226727	G/T/K	-0.573681	-0.849991	0	4	1	2	Intron (ENSSSCT00000042817.2/ENSSSCG00000024392.3, intron 5 of 7)	1	35333465	35519870	186406	1	ENSSSCT00000030479.3	107332	ENSSSCG00000024392	ENSSSCG00000024392
chr1:35440816	chr1	35440816	S1_35440816	A	G	A	G	0.71429	0.28571	0	2	0.28571	G	0.1667	0.375	A	2	12646.3	2.50033e-08	0.138155	0.0756452	0.79691	0.711836	2.00812	0.22942	5	0.999842	1.42826	1.42826e-05	13.6425	1.30626e-07	0.00226727	A/G/R	-0.573681	-0.849991	0	4	1	2	Intron (ENSSSCT00000042817.2/ENSSSCG00000024392.3, intron 5 of 7)	1	35333465	35519870	186406	1	ENSSSCT00000030479.3	107351	ENSSSCG00000024392	ENSSSCG00000024392
chr1:35742133	chr1	35742133	S1_35742133	G	A	G	A	0.71429	0.28571	0	2	0.28571	A	0	0.5	G	2	30595.3	4.2726e-09	0.392538	1.49047	0.289185	1.24254	14.9336	0.0180794	5	0.999935	0.590413	5.90413e-06	10.1178	5.27123e-08	0.000387435	A/G/R	-0.850003	-1.63508	0	1	4	2	5' UTR	1	35697219	35774071	76853	1	ENSSSCT00000061940.2	44914	ENSSSCG00000004215	ENSSSCG00000004215
chr1:37380342	chr1	37380342	S1_37380342	A	G	A	G	0.64286	0.35714	0	3	0.42857	G	0.5	0.25	A	2	0.843893	0.494576	0.733842	1.22269	0.330861	1.03866	1.07201	0.35898	5	0.296739	0.825001	0.36441	11.5059	0.781202	1	A/G/R	-0.304814	-1.7725	0	3	1	3	Distal Intergenic	1	37219883	37231385	11503	2	ENSSSCT00000004668.4	-148957	ENSSSCG00000004223	ENSSSCG00000004223
chr1:37380357	chr1	37380357	S1_37380357	A	G	A	G	0.64286	0.35714	0	3	0.42857	G	0.5	0.25	A	2	0.843893	0.494576	0.733842	1.22269	0.330861	1.03866	1.07201	0.35898	5	0.296739	0.825001	0.36441	11.5059	0.781202	1	A/G/R	-0.304814	-1.7725	0	3	1	3	Distal Intergenic	1	37219883	37231385	11503	2	ENSSSCT00000004668.4	-148972	ENSSSCG00000004223	ENSSSCG00000004223
chr1:37380359	chr1	37380359	S1_37380359	C	T	C	T	0.64286	0.35714	0	3	0.42857	T	0.5	0.25	C	2	0.843893	0.494576	0.733842	1.22269	0.330861	1.03866	1.07201	0.35898	5	0.296739	0.825001	0.36441	11.5059	0.781202	1	C/T/Y	-0.304814	-1.7725	0	3	1	3	Distal Intergenic	1	37219883	37231385	11503	2	ENSSSCT00000004668.4	-148974	ENSSSCG00000004223	ENSSSCG00000004223
chr1:38439948	chr1	38439948	S1_38439948	G	T	G	T	0.57143	0.42857	0	4	0.57143	T	0.5	0.375	G	2	20437.5	9.57457e-09	0.425	40873.2	3.5909e-09	-0.914146	1.39374	0.303181	5	0.999902	0.883832	8.83832e-06	11.7635	8.28921e-08	0.000868212	G/T/K	1.33915	0.489146	0	2	1	4	Intron (ENSSSCT00000086190.1/ENSSSCG00000036607.2, intron 3 of 6)	1	38014254	38310651	296398	2	ENSSSCT00000046717.2	-129297	ENSSSCG00000036607	ENSSSCG00000036607
chr1:38439977	chr1	38439977	S1_38439977	G	T	T	G	0.57143	0.42857	0	4	0.57143	G	0.5	0.375	T	2	20437.5	9.57457e-09	-0.425	40873.2	3.5909e-09	-0.914146	1.39374	0.303181	5	0.999902	0.883832	8.83832e-06	11.7635	8.28921e-08	0.000868212	G/T/K	0.489146	1.33915	0	1	2	4	Intron (ENSSSCT00000086190.1/ENSSSCG00000036607.2, intron 3 of 6)	1	38014254	38310651	296398	2	ENSSSCT00000046717.2	-129326	ENSSSCG00000036607	ENSSSCG00000036607
chr1:38440443	chr1	38440443	S1_38440443	C	T	C	T	0.58333	0.41667	0.14286	1	0.16667	T	0.5	0.3333	C	2	1.59066	0.338111	-0.373788	3.05126	0.179005	-0.664459	0.162877	0.713565	4	0.514661	1.80435	0.096322	11.5979	0.694022	1	C/T/Y	0.29067	1.03825	0	3	2	1	Intron (ENSSSCT00000086190.1/ENSSSCG00000036607.2, intron 3 of 6)	1	38014254	38310651	296398	2	ENSSSCT00000046717.2	-129792	ENSSSCG00000036607	ENSSSCG00000036607
chr1:38440758	chr1	38440758	S1_38440758	C	T	C	T	0.57143	0.42857	0	4	0.57143	T	0.5	0.375	C	2	20437.5	9.57457e-09	0.425	40873.2	3.5909e-09	-0.914146	1.39374	0.303181	5	0.999902	0.883832	8.83832e-06	11.7635	8.28921e-08	0.000868212	C/T/Y	1.33915	0.489146	0	2	1	4	Intron (ENSSSCT00000086190.1/ENSSSCG00000036607.2, intron 3 of 6)	1	38014254	38310651	296398	2	ENSSSCT00000046717.2	-130107	ENSSSCG00000036607	ENSSSCG00000036607
chr1:38440792	chr1	38440792	S1_38440792	G	T	T	G	0.57143	0.42857	0	4	0.57143	G	0.5	0.375	T	2	20437.5	9.57457e-09	-0.425	40873.2	3.5909e-09	-0.914146	1.39374	0.303181	5	0.999902	0.883832	8.83832e-06	11.7635	8.28921e-08	0.000868212	G/T/K	0.489146	1.33915	0	1	2	4	Intron (ENSSSCT00000086190.1/ENSSSCG00000036607.2, intron 3 of 6)	1	38014254	38310651	296398	2	ENSSSCT00000046717.2	-130141	ENSSSCG00000036607	ENSSSCG00000036607
chr1:38567121	chr1	38567121	S1_38567121	G	A	G	A	0.78571	0.21429	0	1	0.14286	A	0.1667	0.25	G	2	18358.8	1.18652e-08	-0.424996	36715.8	4.45006e-09	-1.3561	1.3217	0.31435	5	0.999891	0.983893	9.83893e-06	11.9279	8.89569e-08	0.00107593	A/G/R	0.931103	1.78109	0	1	5	1	Intron (ENSSSCT00000086190.1/ENSSSCG00000036607.2, intron 1 of 6)	1	38489061	38648918	159858	2	ENSSSCT00000050380.2	81797	ENSSSCG00000036607	ENSSSCG00000036607
chr1:38567123	chr1	38567123	S1_38567123	C	G	C	G	0.78571	0.21429	0	1	0.14286	G	0.1667	0.25	C	2	18358.8	1.18652e-08	0.424996	36715.8	4.45006e-09	-1.3561	1.3217	0.31435	5	0.999891	0.983893	9.83893e-06	11.9279	8.89569e-08	0.00107593	C/G/S	1.78109	0.931103	0	5	1	1	Intron (ENSSSCT00000086190.1/ENSSSCG00000036607.2, intron 1 of 6)	1	38489061	38648918	159858	2	ENSSSCT00000050380.2	81795	ENSSSCG00000036607	ENSSSCG00000036607
chr1:38567141	chr1	38567141	S1_38567141	C	T	C	T	0.5	0.5	0	3	0.42857	C	0.5	0.5	T	2	16014.5	1.55927e-08	-0.425	32028.7	5.84765e-09	0.59677	0.396043	0.563294	5	0.999875	1.1279	1.1279e-05	12.1719	9.61171e-08	0.00141393	C/T/Y	-1.02177	-0.17177	0	2	2	3	Intron (ENSSSCT00000086190.1/ENSSSCG00000036607.2, intron 1 of 6)	1	38489061	38648918	159858	2	ENSSSCT00000050380.2	81777	ENSSSCG00000036607	ENSSSCG00000036607
chr1:40021805	chr1	40021805	S1_40021805	A	T	A	T	0.66667	0.33333	0.14286	2	0.33333	T	0.3333	0.3333	A	2	1.16031	0.423388	-0.354356	0.40245	0.570897	-1.39597	1.93819	0.258117	4	0.000453286	1.16129	1.16129e-05	11.0564	0.754361	1	A/T/W	1.04161	1.75032	0	3	1	2	Promoter (<=1kb)	1	39913762	40022713	108952	2	ENSSSCT00000041271.2	908	ENSSSCG00000004236	ENSSSCG00000004236
chr1:40065549	chr1	40065549	S1_40065549	C	T	T	C	0.57143	0.42857	0	4	0.57143	C	0.3333	0.5	T	2	12738.4	2.46428e-08	-0.0778834	0.0180035	0.899743	0.772105	1.76934	0.254237	5	0.999843	1.41793	1.41793e-05	13.317	1.30388e-07	0.00223459	C/T/Y	-0.849989	-0.694222	0	1	2	4	Distal Intergenic	1	40099339	40137965	38627	1	ENSSSCT00000059055.2	-33790	ENSSSCG00000004237	ENSSSCG00000004237
chr1:40065556	chr1	40065556	S1_40065556	G	A	A	G	0.57143	0.42857	0	4	0.57143	G	0.3333	0.5	A	2	12738.4	2.46428e-08	0.0778834	0.0180035	0.899743	0.772105	1.76934	0.254237	5	0.999843	1.41793	1.41793e-05	13.317	1.30388e-07	0.00223459	A/G/R	-0.694222	-0.849989	0	2	1	4	Distal Intergenic	1	40099339	40137965	38627	1	ENSSSCT00000059055.2	-33783	ENSSSCG00000004237	ENSSSCG00000004237
chr1:40262912	chr1	40262912	S1_40262912	C	T	C	T	0.64286	0.35714	0	3	0.42857	T	0.1667	0.5	C	2	0.207882	0.820556	-0.10541	0.0200727	0.894183	0.570779	0.290717	0.618372	5	0.0941544	0.0223528	1.65216	13.4244	0.940348	1	C/T/Y	-0.676189	-0.465369	0	3	1	3	Distal Intergenic	1	40147271	40180297	33027	2	ENSSSCT00000057546.1	-82615	ENSSSCG00000004238	ENSSSCG00000004238
chr1:40262976	chr1	40262976	S1_40262976	A	G	A	G	0.64286	0.35714	0	3	0.42857	G	0.1667	0.5	A	2	0.207882	0.820556	-0.10541	0.0200727	0.894183	0.570779	0.290717	0.618372	5	0.0941544	0.0223528	1.65216	13.4244	0.940348	1	A/G/R	-0.676189	-0.465369	0	3	1	3	Distal Intergenic	1	40147271	40180297	33027	2	ENSSSCT00000057546.1	-82679	ENSSSCG00000004238	ENSSSCG00000004238
chr1:40333007	chr1	40333007	S1_40333007	T	C	T	C	0.78571	0.21429	0	1	0.14286	C	0	0.375	T	2	1.38519	0.349054	0.0979973	0.0291724	0.872673	1.808	2.29147	0.204646	5	0.409192	1.09732e-05	1.09732	11.723	0.696766	1	C/T/Y	-1.71	-1.906	0	1	5	1	Distal Intergenic	1	40473051	40532174	59124	1	ENSSSCT00000073237.1	-140044	ENSSSCG00000046149	ENSSSCG00000046149
chr1:40333049	chr1	40333049	S1_40333049	A	G	A	G	0.78571	0.21429	0	1	0.14286	G	0	0.375	A	2	1.38519	0.349054	-0.0979973	0.0291724	0.872673	1.808	2.29147	0.204646	5	0.409192	1.09732e-05	1.09732	11.723	0.696766	1	A/G/R	-1.906	-1.71	0	5	1	1	Distal Intergenic	1	40473051	40532174	59124	1	ENSSSCT00000073237.1	-140002	ENSSSCG00000046149	ENSSSCG00000046149
chr1:40701084	chr1	40701084	S1_40701084	A	G	A	G	0.57143	0.42857	0	4	0.57143	G	0.5	0.375	A	2	1.60414	0.307933	-0.0625037	0.0101079	0.924755	-1.40749	3.07534	0.154354	5	0.445083	1.03066e-05	1.03066	11.4723	0.647602	1	A/G/R	1.34499	1.47	0	2	1	4	Distal Intergenic	1	40662414	40697828	35415	1	ENSSSCT00000087242.1	38670	ENSSSCG00000043582	ENSSSCG00000043582
chr1:41029172	chr1	41029172	S1_41029172	G	T	G	T	0.71429	0.28571	0	2	0.28571	T	0.5	0.125	G	2	0.120638	0.889461	0.370064	0.224286	0.660484	0.36794	0.0789834	0.792618	5	0.0568875	1.32318	0.360003	12.5804	0.975726	1	G/T/K	0.00212388	-0.738004	0	4	1	2	Distal Intergenic	1	40988831	41002137	13307	2	ENSSSCT00000062855.2	-27035	ENSSSCG00000004241	ENSSSCG00000004241
chr1:41190095	chr1	41190095	S1_41190095	A	G	A	G	0.64286	0.35714	0	3	0.42857	G	0.5	0.25	A	2	13294.2	2.26258e-08	0.145207	0.0445013	0.843235	0.995193	2.09024	0.22177	5	0.99985	1.35866	1.35866e-05	12.6448	1.22518e-07	0.00205169	A/G/R	-0.849986	-1.1404	0	3	1	3	Intron (ENSSSCT00000004689.4/ENSSSCG00000004242.4, intron 26 of 33)	1	41057838	41265375	207538	1	ENSSSCT00000060707.2	132257	ENSSSCG00000004242	ENSSSCG00000004242
chr1:41190243	chr1	41190243	S1_41190243	T	C	T	C	0.57143	0.42857	0	2	0.28571	C	0.5	0.375	T	2	0.0248487	0.975607	-0.105109	0.0247862	0.882528	-0.16755	0.0185834	0.898153	5	0.0122719	1.428	0.358039	12.8216	1	1	C/T/Y	0.0624408	0.27266	0	2	3	2	Intron (ENSSSCT00000004689.4/ENSSSCG00000004242.4, intron 26 of 33)	1	41057838	41265375	207538	1	ENSSSCT00000060707.2	132405	ENSSSCG00000004242	ENSSSCG00000004242
chr1:41861506	chr1	41861506	S1_41861506	C	A	C	A	0.64286	0.35714	0	3	0.42857	A	0.5	0.25	C	2	17695.9	1.27707e-08	-0.979339	2.6577	0.178383	0.129353	0.0463641	0.840049	5	0.999887	1.02074	1.02074e-05	11.4872	9.23104e-08	0.00115803	A/C/M	-1.10869	0.849985	0	1	3	3	Distal Intergenic	1	41899366	41900630	1265	2	ENSSSCT00000074160.1	39124	ENSSSCG00000041950	ENSSSCG00000041950
chr1:41861509	chr1	41861509	S1_41861509	A	G	A	G	0.64286	0.35714	0	3	0.42857	G	0.5	0.25	A	2	17695.9	1.27707e-08	0.979339	2.6577	0.178383	0.129353	0.0463641	0.840049	5	0.999887	1.02074	1.02074e-05	11.4872	9.23104e-08	0.00115803	A/G/R	0.849985	-1.10869	0	3	1	3	Distal Intergenic	1	41899366	41900630	1265	2	ENSSSCT00000074160.1	39121	ENSSSCG00000041950	ENSSSCG00000041950
chr1:41861550	chr1	41861550	S1_41861550	G	A	A	G	0.57143	0.42857	0	2	0.28571	G	0.6667	0.25	A	2	2.94392	0.163651	0.770001	3.78768	0.123495	1.20499	2.72824	0.173932	5	0.595462	7.51355e-06	0.751355	10.208	0.506024	1	A/G/R	-0.434992	-1.97499	0	3	2	2	Distal Intergenic	1	41899366	41900630	1265	2	ENSSSCT00000074160.1	39080	ENSSSCG00000041950	ENSSSCG00000041950
chr1:41861561	chr1	41861561	S1_41861561	G	C	G	C	0.64286	0.35714	0	3	0.42857	C	0.5	0.25	G	2	17695.9	1.27707e-08	-0.979339	2.6577	0.178383	0.129353	0.0463641	0.840049	5	0.999887	1.02074	1.02074e-05	11.4872	9.23104e-08	0.00115803	C/G/S	-1.10869	0.849985	0	1	3	3	Distal Intergenic	1	41899366	41900630	1265	2	ENSSSCT00000074160.1	39069	ENSSSCG00000041950	ENSSSCG00000041950
chr1:41861565	chr1	41861565	S1_41861565	G	A	G	A	0.64286	0.35714	0	3	0.42857	A	0.5	0.25	G	2	17695.9	1.27707e-08	-0.979339	2.6577	0.178383	0.129353	0.0463641	0.840049	5	0.999887	1.02074	1.02074e-05	11.4872	9.23104e-08	0.00115803	A/G/R	-1.10869	0.849985	0	1	3	3	Distal Intergenic	1	41899366	41900630	1265	2	ENSSSCT00000074160.1	39065	ENSSSCG00000041950	ENSSSCG00000041950
chr1:41861569	chr1	41861569	S1_41861569	T	C	T	C	0.64286	0.35714	0	3	0.42857	C	0.5	0.25	T	2	17695.9	1.27707e-08	-0.979339	2.6577	0.178383	0.129353	0.0463641	0.840049	5	0.999887	1.02074	1.02074e-05	11.4872	9.23104e-08	0.00115803	C/T/Y	-1.10869	0.849985	0	1	3	3	Distal Intergenic	1	41899366	41900630	1265	2	ENSSSCT00000074160.1	39061	ENSSSCG00000041950	ENSSSCG00000041950
chr1:42730745	chr1	42730745	S1_42730745	T	C	T	C	0.78571	0.21429	0	1	0.14286	C	0	0.375	T	2	0.286134	0.765344	-0.15245	0.0929695	0.775642	1.11253	0.554354	0.497908	5	0.125161	0.814309	0.634194	13.1523	0.911583	1	C/T/Y	-1.26498	-0.960083	0	1	5	1	Promoter (1-2kb)	1	42729721	42896283	166563	1	ENSSSCT00000047113.2	1024	ENSSSCG00000004244	ENSSSCG00000004244
chr1:42777206	chr1	42777206	S1_42777206	C	G	G	C	0.64286	0.35714	0	3	0.42857	C	0.3333	0.375	G	2	14.9182	0.013975	-0.398334	2.16795	0.214898	2.08166	29.6036	0.00553966	5	0.881784	2.19565e-06	0.219565	5.28712	0.0618953	1	C/G/S	-2.48	-1.68333	0	1	3	3	Intron (ENSSSCT00000004691.3/ENSSSCG00000004244.3, intron 4 of 12)	1	42809305	42813972	4668	2	ENSSSCT00000087483.1	36766	ENSSSCG00000044089	ENSSSCG00000044089
chr1:43042625	chr1	43042625	S1_43042625	C	T	C	T	0.71429	0.28571	0	2	0.28571	T	0.3333	0.25	C	2	4.71172	0.0887958	0.572582	1.93093	0.237003	2.08104	9.33159	0.0378515	5	0.702014	0.0794798	0.447687	8.74507	0.308172	1	C/T/Y	-1.50845	-2.65362	0	4	1	2	Intron (ENSSSCT00000004692.4/ENSSSCG00000004245.4, intron 1 of 17)	1	43003764	43113636	109873	1	ENSSSCT00000084226.1	38861	ENSSSCG00000004245	ENSSSCG00000004245
chr1:43042659	chr1	43042659	S1_43042659	T	C	T	C	0.71429	0.28571	0	2	0.28571	C	0.3333	0.25	T	2	4.71172	0.0887958	-0.572582	1.93093	0.237003	2.08104	9.33159	0.0378515	5	0.702014	0.0794798	0.447687	8.74507	0.308172	1	C/T/Y	-2.65362	-1.50845	0	1	4	2	Intron (ENSSSCT00000004692.4/ENSSSCG00000004245.4, intron 1 of 17)	1	43003764	43113636	109873	1	ENSSSCT00000084226.1	38895	ENSSSCG00000004245	ENSSSCG00000004245
chr1:43121149	chr1	43121149	S1_43121149	G	T	G	T	0.57143	0.42857	0	2	0.28571	T	0.8333	0.125	G	2	2.24216	0.222273	0.845261	4.1135	0.112446	0.681496	0.694309	0.451566	5	0.528542	0.440188	0.34046	10.0917	0.536906	1	G/T/K	0.163765	-1.52676	0	3	2	2	Distal Intergenic	1	43171928	43198337	26410	1	ENSSSCT00000004693.4	-50779	ENSSSCG00000004246	ENSSSCG00000004246
chr1:43598109	chr1	43598109	S1_43598109	A	G	A	G	0.78571	0.21429	0	1	0.14286	G	0	0.375	A	2	0.286134	0.765344	0.15245	0.0929695	0.775642	1.11253	0.554354	0.497908	5	0.125161	0.814309	0.634194	13.1523	0.911583	1	A/G/R	-0.960083	-1.26498	0	5	1	1	Distal Intergenic	1	43570438	43583553	13116	2	ENSSSCT00000076843.1	-14556	ENSSSCG00000043532	ENSSSCG00000043532
chr1:43623131	chr1	43623131	S1_43623131	C	G	C	G	0.71429	0.28571	0	2	0.28571	G	0.1667	0.375	C	2	16064.5	1.54958e-08	-0.425001	32128.9	5.81126e-09	-0.728995	0.497278	0.519596	5	0.999876	1.12439	1.12439e-05	12.3892	9.61171e-08	0.00140515	C/G/S	0.303994	1.154	0	4	1	2	Distal Intergenic	1	43628677	43628800	124	2	ENSSSCT00000022018.2	5669	ENSSSCG00000020423	ENSSSCG00000020423
chr1:43623303	chr1	43623303	S1_43623303	T	C	T	C	0.58333	0.41667	0.14286	1	0.16667	C	0.6667	0.1667	T	2	25407.6	4.53579e-07	-0.343588	0.718004	0.459046	1.19359	8.66432	0.0603387	4	0.999941	0.710935	7.10935e-06	8.96987	2.23703e-06	0.0411301	C/T/Y	-1.53718	-0.850003	0	2	3	1	Distal Intergenic	1	43628677	43628800	124	2	ENSSSCT00000022018.2	5497	ENSSSCG00000020423	ENSSSCG00000020423
chr1:43623340	chr1	43623340	S1_43623340	C	T	C	T	0.66667	0.33333	0.14286	2	0.33333	T	0.3333	0.3333	C	2	13.0146	0.0332222	0.398334	3.12535	0.175242	1.81666	26.0025	0.0145837	4	0.896656	1.52304e-06	0.152304	4.08443	0.13947	1	C/T/Y	-1.41833	-2.215	0	3	1	2	Distal Intergenic	1	43628677	43628800	124	2	ENSSSCT00000022018.2	5460	ENSSSCG00000020423	ENSSSCG00000020423
chr1:44069485	chr1	44069485	S1_44069485	C	G	C	G	0.64286	0.35714	0	1	0.14286	G	0	0.625	C	2	2.73084	0.178724	-0.489996	1.63081	0.270684	1.71	3.13599	0.151286	5	0.577242	7.85196e-06	0.785196	10.3843	0.510969	1	C/G/S	-2.2	-1.22	0	4	2	1	Distal Intergenic	1	44147980	44154816	6837	1	ENSSSCT00000091336.1	-78495	ENSSSCG00000045405	ENSSSCG00000045405
chr1:44069555	chr1	44069555	S1_44069555	C	T	C	T	0.71429	0.28571	0	2	0.28571	T	0.3333	0.25	C	2	20629.4	9.39732e-09	-0.424999	41256.9	3.52442e-09	-1.39743	2.57627	0.183747	5	0.999903	0.875613	8.75613e-06	11.4823	8.28921e-08	0.00085214	C/T/Y	0.972426	1.82243	0	4	1	2	Distal Intergenic	1	44147980	44154816	6837	1	ENSSSCT00000091336.1	-78425	ENSSSCG00000045405	ENSSSCG00000045405
chr1:44197980	chr1	44197980	S1_44197980	G	A	G	A	0.71429	0.28571	0	2	0.28571	A	0	0.5	G	2	3.07633	0.155225	0.244995	0.262481	0.635413	1.59	4.25206	0.1082	5	0.606014	7.31757e-06	0.731757	10.1023	0.486339	1	A/G/R	-1.34501	-1.835	0	1	4	2	Distal Intergenic	1	44156778	44186194	29417	2	ENSSSCT00000030561.3	-11786	ENSSSCG00000020885	ENSSSCG00000020885
chr1:44254637	chr1	44254637	S1_44254637	G	A	G	A	0.58333	0.41667	0.14286	1	0.16667	A	0.6667	0.1667	G	2	0.927108	0.485851	-0.655883	1.48514	0.310061	1.13967	0.596053	0.496329	4	0.000396983	1.27287	1.27287e-05	10.8356	0.781202	1	A/G/R	-1.79555	-0.483783	0	2	3	1	Intron (ENSSSCT00000054920.2/ENSSSCG00000004253.3, intron 1 of 8)	1	44239404	44285866	46463	1	ENSSSCT00000004701.3	15233	ENSSSCG00000004253	ENSSSCG00000004253
chr1:44306235	chr1	44306235	S1_44306235	G	A	G	A	0.71429	0.28571	0	2	0.28571	A	0	0.5	G	2	3.07633	0.155225	0.244995	0.262481	0.635413	1.59	4.25206	0.1082	5	0.606014	7.31757e-06	0.731757	10.1023	0.486339	1	A/G/R	-1.34501	-1.835	0	1	4	2	Intron (ENSSSCT00000079185.1/ENSSSCG00000004254.4, intron 13 of 14)	1	44239404	44285866	46463	1	ENSSSCT00000004701.3	66831	ENSSSCG00000004253	ENSSSCG00000004253
chr1:44306265	chr1	44306265	S1_44306265	C	T	C	T	0.64286	0.35714	0	1	0.14286	T	0.6667	0.125	C	2	20629.4	9.39732e-09	0.486213	1.24752	0.326586	1.33621	9.42137	0.0373139	5	0.999903	0.875613	8.75613e-06	11.4823	8.28921e-08	0.00085214	C/T/Y	-0.849999	-1.82243	0	4	2	1	Intron (ENSSSCT00000079185.1/ENSSSCG00000004254.4, intron 13 of 14)	1	44239404	44285866	46463	1	ENSSSCT00000004701.3	66861	ENSSSCG00000004253	ENSSSCG00000004253
chr1:44306274	chr1	44306274	S1_44306274	T	A	T	A	0.64286	0.35714	0	1	0.14286	A	0.6667	0.125	T	2	20629.4	9.39732e-09	-0.486213	1.24752	0.326586	1.33621	9.42137	0.0373139	5	0.999903	0.875613	8.75613e-06	11.4823	8.28921e-08	0.00085214	A/T/W	-1.82243	-0.849999	0	2	4	1	Intron (ENSSSCT00000079185.1/ENSSSCG00000004254.4, intron 13 of 14)	1	44239404	44285866	46463	1	ENSSSCT00000004701.3	66870	ENSSSCG00000004253	ENSSSCG00000004253
chr1:44329469	chr1	44329469	S1_44329469	A	G	A	G	0.625	0.375	0.42857	1	0.25	G	0.5	0.3333	A	2	246.129	0.045026	-0.406683	41.2913	0.0982837	-2.59393	486.755	0.0288355	2	0.983669	0.0078589	7.8589e-08	Inf	0.187565	1	A/G/R	2.18725	3.00061	0	2	1	1	Intron (ENSSSCT00000079185.1/ENSSSCG00000004254.4, intron 3 of 14)	1	44276675	44373706	97032	2	ENSSSCT00000079185.1	44237	ENSSSCG00000004254	ENSSSCG00000004254
chr1:44339322	chr1	44339322	S1_44339322	G	A	A	G	0.58333	0.41667	0.14286	3	0.5	G	0.3333	0.5	A	2	22.4664	0.0156578	0.252881	1.05975	0.379006	2.05311	44.5277	0.00686249	4	0.000974228	0.128905	1.28905e-06	4.13381	0.0687313	1	A/G/R	-1.80022	-2.30599	0	2	1	3	Intron (ENSSSCT00000079185.1/ENSSSCG00000004254.4, intron 2 of 14)	1	44276675	44373706	97032	2	ENSSSCT00000079185.1	34384	ENSSSCG00000004254	ENSSSCG00000004254
chr1:44345306	chr1	44345306	S1_44345306	C	T	C	T	0.64286	0.35714	0	3	0.42857	T	0.3333	0.375	C	2	14.9182	0.013975	0.398334	2.16795	0.214898	2.08166	29.6036	0.00553966	5	0.881784	2.19565e-06	0.219565	5.28712	0.0618953	1	C/T/Y	-1.68333	-2.48	0	3	1	3	Intron (ENSSSCT00000079185.1/ENSSSCG00000004254.4, intron 2 of 14)	1	44276675	44373706	97032	2	ENSSSCT00000079185.1	28400	ENSSSCG00000004254	ENSSSCG00000004254
chr1:44423810	chr1	44423810	S1_44423810	C	T	C	T	0.71429	0.28571	0	2	0.28571	T	0	0.5	C	2	3.07633	0.155225	-0.244995	0.262481	0.635413	1.59	4.25206	0.1082	5	0.606014	7.31757e-06	0.731757	10.1023	0.486339	1	C/T/Y	-1.835	-1.34501	0	4	1	2	Intron (ENSSSCT00000041797.2/ENSSSCG00000026978.3, intron 4 of 43)	1	44409931	44534874	124944	1	ENSSSCT00000041797.2	13879	ENSSSCG00000026978	ENSSSCG00000026978
chr1:44423863	chr1	44423863	S1_44423863	A	G	A	G	0.71429	0.28571	0	2	0.28571	G	0	0.5	A	2	3.07633	0.155225	-0.244995	0.262481	0.635413	1.59	4.25206	0.1082	5	0.606014	7.31757e-06	0.731757	10.1023	0.486339	1	A/G/R	-1.835	-1.34501	0	4	1	2	Intron (ENSSSCT00000041797.2/ENSSSCG00000026978.3, intron 4 of 43)	1	44409931	44534874	124944	1	ENSSSCT00000041797.2	13932	ENSSSCG00000026978	ENSSSCG00000026978
chr1:44423866	chr1	44423866	S1_44423866	G	C	G	C	0.71429	0.28571	0	2	0.28571	C	0	0.5	G	2	3.07633	0.155225	0.244995	0.262481	0.635413	1.59	4.25206	0.1082	5	0.606014	7.31757e-06	0.731757	10.1023	0.486339	1	C/G/S	-1.34501	-1.835	0	1	4	2	Intron (ENSSSCT00000041797.2/ENSSSCG00000026978.3, intron 4 of 43)	1	44409931	44534874	124944	1	ENSSSCT00000041797.2	13935	ENSSSCG00000026978	ENSSSCG00000026978
chr1:44843312	chr1	44843312	S1_44843312	T	C	C	T	0.5	0.5	0.14286	2	0.33333	C	0.6667	0.3333	T	2	2.72294	0.211697	-0.236703	0.228179	0.665523	1.618	5.09652	0.109173	4	0.000670121	0.731575	7.31575e-06	9.37178	0.526111	1	C/T/Y	-1.8547	-1.38129	0	2	2	2	Distal Intergenic	1	44836936	44837050	115	1	ENSSSCT00000020721.2	6376	ENSSSCG00000019126	ENSSSCG00000019126
chr1:44895885	chr1	44895885	S1_44895885	A	G	A	G	0.64286	0.35714	0	1	0.14286	G	0	0.625	A	2	2.73084	0.178724	-0.489996	1.63081	0.270684	1.71	3.13599	0.151286	5	0.577242	7.85196e-06	0.785196	10.3843	0.510969	1	A/G/R	-2.2	-1.22	0	4	2	1	Intron (ENSSSCT00000058714.2/ENSSSCG00000038522.2, intron 4 of 4)	1	44899219	44899545	327	1	ENSSSCT00000004710.2	-3334	ENSSSCG00000004261	ENSSSCG00000004261
chr1:45098564	chr1	45098564	S1_45098564	T	C	C	T	0.625	0.375	0.42857	1	0.25	T	0.3333	0.5	C	2	32.2129	0.12363	0.276153	2.81847	0.342003	1.88551	64.4253	0.0789078	2	0.830438	0.057568	5.7568e-07	Inf	0.414403	1	C/T/Y	-1.60936	-2.16167	0	2	1	1	Distal Intergenic	1	45063300	45084110	20811	2	ENSSSCT00000071575.1	-14454	ENSSSCG00000046094	ENSSSCG00000046094
chr1:45118104	chr1	45118104	S1_45118104	A	C	A	C	0.71429	0.28571	0	2	0.28571	C	0.3333	0.25	A	2	36283.4	3.03805e-09	0.664832	2.51116	0.18822	1.51484	13.0367	0.0225438	5	0.999945	0.49786	4.9786e-06	8.73311	3.98046e-08	0.000275488	A/C/M	-0.850011	-2.17968	0	4	1	2	Promoter (1-2kb)	1	45116662	45121670	5009	1	ENSSSCT00000083916.1	1442	ENSSSCG00000043689	ENSSSCG00000043689
chr1:45118109	chr1	45118109	S1_45118109	T	G	T	G	0.71429	0.28571	0	2	0.28571	G	0.3333	0.25	T	2	36283.4	3.03805e-09	-0.664832	2.51116	0.18822	1.51484	13.0367	0.0225438	5	0.999945	0.49786	4.9786e-06	8.73311	3.98046e-08	0.000275488	G/T/K	-2.17968	-0.850011	0	1	4	2	Promoter (1-2kb)	1	45116662	45121670	5009	1	ENSSSCT00000083916.1	1447	ENSSSCG00000043689	ENSSSCG00000043689
chr1:45133411	chr1	45133411	S1_45133411	G	C	G	C	0.66667	0.33333	0.14286	2	0.33333	C	0.5	0.1667	G	2	0.79697	0.52772	-0.916511	1.56205	0.299987	0.613217	0.30544	0.619004	4	0.346917	0.408657	1.07443	11.1061	0.794534	1	C/G/S	-1.52973	0.303293	0	1	3	2	Distal Intergenic	1	45116662	45121670	5009	1	ENSSSCT00000083916.1	16749	ENSSSCG00000043689	ENSSSCG00000043689
chr1:45133493	chr1	45133493	S1_45133493	C	T	C	T	0.66667	0.33333	0.14286	2	0.33333	T	0.5	0.1667	C	2	0.79697	0.52772	0.916511	1.56205	0.299987	0.613217	0.30544	0.619004	4	0.346917	0.408657	1.07443	11.1061	0.794534	1	C/T/Y	0.303293	-1.52973	0	3	1	2	Distal Intergenic	1	45116662	45121670	5009	1	ENSSSCT00000083916.1	16831	ENSSSCG00000043689	ENSSSCG00000043689
chr1:45162879	chr1	45162879	S1_45162879	T	C	T	C	0.58333	0.41667	0.14286	3	0.5	C	0.6667	0.1667	T	2	1.40781	0.3705	-0.950348	2.14586	0.239186	-0.192089	0.0421073	0.85055	4	0.000503162	1.06245	1.06245e-05	10.6032	0.706414	1	C/T/Y	-0.75826	1.14244	0	1	2	3	Distal Intergenic	1	45170468	45180289	9822	1	ENSSSCT00000026265.3	-7589	ENSSSCG00000025941	ENSSSCG00000025941
chr1:45162917	chr1	45162917	S1_45162917	G	A	G	A	0.66667	0.33333	0.14286	2	0.33333	A	0	0.6667	G	2	16.6413	0.0237758	0.927214	10.8679	0.0458485	1.08039	7.90899	0.0671652	4	0.000953342	0.170296	1.70296e-06	4.96151	0.102557	1	A/G/R	-0.153176	-2.00761	0	1	3	2	Distal Intergenic	1	45170468	45180289	9822	1	ENSSSCT00000026265.3	-7551	ENSSSCG00000025941	ENSSSCG00000025941
chr1:45200734	chr1	45200734	S1_45200734	C	T	C	T	0.7	0.3	0.28571	1	0.2	T	0.5	0.1667	C	2	1.91396	0.343176	0.724803	2.08726	0.285385	1.91691	2.71876	0.240948	3	0.632575	0.662489	0.0145673	5.02	0.696766	1	C/T/Y	-1.19211	-2.64172	0	3	1	1	Distal Intergenic	1	45219440	45296400	76961	1	ENSSSCT00000040949.2	-18706	ENSSSCG00000035259	ENSSSCG00000035259
chr1:45320110	chr1	45320110	S1_45320110	C	T	C	T	0.57143	0.42857	0	4	0.57143	T	0.6667	0.25	C	2	0.402267	0.693134	0.609386	0.687406	0.453657	0.574328	0.405425	0.558916	5	0.167453	0.621187	0.764247	12.8403	0.867529	1	C/T/Y	0.0350586	-1.18371	0	2	1	4	Distal Intergenic	1	45244294	45251073	6780	2	ENSSSCT00000087861.1	-69037	ENSSSCG00000047872	ENSSSCG00000047872
chr1:45415216	chr1	45415216	S1_45415216	C	T	T	C	0.57143	0.42857	0	2	0.28571	C	0.6667	0.25	T	2	2.44741	0.20223	-0.470828	1.27395	0.322136	-1.36083	3.1301	0.151579	5	0.5503	8.35236e-06	0.835236	10.6314	0.526111	1	C/T/Y	0.890006	1.83166	0	2	3	2	Distal Intergenic	1	45244294	45251073	6780	2	ENSSSCT00000087861.1	-164143	ENSSSCG00000047872	ENSSSCG00000047872
chr1:45415289	chr1	45415289	S1_45415289	T	C	C	T	0.57143	0.42857	0	2	0.28571	T	0.6667	0.25	C	2	2.44741	0.20223	0.470828	1.27395	0.322136	-1.36083	3.1301	0.151579	5	0.5503	8.35236e-06	0.835236	10.6314	0.526111	1	C/T/Y	1.83166	0.890006	0	3	2	2	Distal Intergenic	1	45244294	45251073	6780	2	ENSSSCT00000087861.1	-164216	ENSSSCG00000047872	ENSSSCG00000047872
chr1:45578720	chr1	45578720	S1_45578720	C	T	C	T	0.57143	0.42857	0	2	0.28571	T	0.1667	0.625	C	2	0.592475	0.595156	-0.476662	0.761127	0.432216	0.556665	0.305311	0.609995	5	0.228536	1.43285e-05	1.43285	12.7902	0.823633	1	C/T/Y	-1.03333	-0.0800027	0	3	2	2	Distal Intergenic	1	45244294	45251073	6780	2	ENSSSCT00000087861.1	-327647	ENSSSCG00000047872	ENSSSCG00000047872
chr1:46203188	chr1	46203188	S1_46203188	G	T	G	T	0.7	0.3	0.28571	1	0.2	T	0.1667	0.5	G	2	0.272088	0.786109	-0.60397	0.451186	0.570968	-0.83157	0.239447	0.67301	3	0.208014	1.74897	1.74897e-05	7.45568	0.926341	1	G/T/K	0.2276	1.43554	0	3	1	1	Distal Intergenic	1	46070668	46075983	5316	2	ENSSSCT00000070771.1	-127205	ENSSSCG00000049526	ENSSSCG00000049526
chr1:46203226	chr1	46203226	S1_46203226	A	C	A	C	0.7	0.3	0.28571	1	0.2	C	0.1667	0.5	A	2	0.272088	0.786109	-0.60397	0.451186	0.570968	-0.83157	0.239447	0.67301	3	0.208014	1.74897	1.74897e-05	7.45568	0.926341	1	A/C/M	0.2276	1.43554	0	3	1	1	Distal Intergenic	1	46070668	46075983	5316	2	ENSSSCT00000070771.1	-127243	ENSSSCG00000049526	ENSSSCG00000049526
chr1:46203255	chr1	46203255	S1_46203255	G	C	G	C	0.7	0.3	0.28571	1	0.2	C	0.1667	0.5	G	2	0.272088	0.786109	0.60397	0.451186	0.570968	-0.83157	0.239447	0.67301	3	0.208014	1.74897	1.74897e-05	7.45568	0.926341	1	C/G/S	1.43554	0.2276	0	1	3	1	Distal Intergenic	1	46070668	46075983	5316	2	ENSSSCT00000070771.1	-127272	ENSSSCG00000049526	ENSSSCG00000049526
chr1:46687344	chr1	46687344	S1_46687344	G	C	G	C	0.64286	0.35714	0	1	0.14286	C	0.1667	0.5	G	2	0.15936	0.857847	0.0774433	0.0241973	0.883918	-0.783749	0.310539	0.607059	5	0.0737997	0.603826	0.949372	13.2893	0.965324	1	C/G/S	0.861192	0.706306	0	2	4	1	Distal Intergenic	1	46705103	46717416	12314	2	ENSSSCT00000075053.1	30072	ENSSSCG00000050391	ENSSSCG00000050391
chr1:46776050	chr1	46776050	S1_46776050	A	G	A	G	0.66667	0.33333	0.14286	2	0.33333	G	0.1667	0.5	A	2	0.618535	0.595777	-0.721665	0.892582	0.414478	0.311663	0.0665897	0.813058	4	0.291964	1.7504e-05	1.7504	11.4096	0.823633	1	A/G/R	-1.03333	0.410002	0	3	1	2	Distal Intergenic	1	46705103	46717416	12314	2	ENSSSCT00000075053.1	-58634	ENSSSCG00000050391	ENSSSCG00000050391
chr1:46776051	chr1	46776051	S1_46776051	G	T	G	T	0.66667	0.33333	0.14286	2	0.33333	T	0.1667	0.5	G	2	0.618535	0.595777	-0.721665	0.892582	0.414478	0.311663	0.0665897	0.813058	4	0.291964	1.7504e-05	1.7504	11.4096	0.823633	1	G/T/K	-1.03333	0.410002	0	3	1	2	Distal Intergenic	1	46705103	46717416	12314	2	ENSSSCT00000075053.1	-58635	ENSSSCG00000050391	ENSSSCG00000050391
chr1:46776124	chr1	46776124	S1_46776124	T	G	T	G	0.66667	0.33333	0.14286	2	0.33333	G	0.1667	0.5	T	2	0.618535	0.595777	0.721665	0.892582	0.414478	0.311663	0.0665897	0.813058	4	0.291964	1.7504e-05	1.7504	11.4096	0.823633	1	G/T/K	0.410002	-1.03333	0	1	3	2	Distal Intergenic	1	46705103	46717416	12314	2	ENSSSCT00000075053.1	-58708	ENSSSCG00000050391	ENSSSCG00000050391
chr1:47081386	chr1	47081386	S1_47081386	G	A	G	A	0.58333	0.41667	0.14286	1	0.16667	A	0.25	0.5	G	2	0.455949	0.671584	-0.249336	0.458177	0.546997	-0.943711	0.41108	0.567041	4	0.233099	1.2134	0.339087	11.1787	0.867529	1	A/G/R	0.694375	1.19305	0	2	3	1	Distal Intergenic	1	47233226	47233330	105	2	ENSSSCT00000022075.2	151944	ENSSSCG00000020480	ENSSSCG00000020480
chr1:47394232	chr1	47394232	S1_47394232	G	A	G	A	0.71429	0.28571	0	2	0.28571	A	0.3333	0.25	G	2	36283.4	3.03805e-09	-0.664832	2.51116	0.18822	1.51484	13.0367	0.0225438	5	0.999945	0.49786	4.9786e-06	8.73311	3.98046e-08	0.000275488	A/G/R	-2.17968	-0.850011	0	1	4	2	Distal Intergenic	1	47314290	47314401	112	2	ENSSSCT00000084905.1	-79831	ENSSSCG00000043187	ENSSSCG00000043187
chr1:47534153	chr1	47534153	S1_47534153	G	A	A	G	0.57143	0.42857	0	4	0.57143	G	0.3333	0.5	A	2	0.839852	0.495985	-0.95125	1.47858	0.290848	-0.801199	0.653026	0.46435	5	0.295738	0.820639	0.368955	11.291	0.781202	1	A/G/R	-0.150051	1.75245	0	2	1	4	Distal Intergenic	1	47314290	47314401	112	2	ENSSSCT00000084905.1	-219752	ENSSSCG00000043187	ENSSSCG00000043187
chr1:47534161	chr1	47534161	S1_47534161	G	A	A	G	0.57143	0.42857	0	4	0.57143	G	0.3333	0.5	A	2	0.839852	0.495985	-0.95125	1.47858	0.290848	-0.801199	0.653026	0.46435	5	0.295738	0.820639	0.368955	11.291	0.781202	1	A/G/R	-0.150051	1.75245	0	2	1	4	Distal Intergenic	1	47314290	47314401	112	2	ENSSSCT00000084905.1	-219760	ENSSSCG00000043187	ENSSSCG00000043187
chr1:47552289	chr1	47552289	S1_47552289	C	T	C	T	0.71429	0.28571	0	2	0.28571	T	0.3333	0.25	C	2	36283.4	3.03805e-09	0.664832	2.51116	0.18822	1.51484	13.0367	0.0225438	5	0.999945	0.49786	4.9786e-06	8.73311	3.98046e-08	0.000275488	C/T/Y	-0.850011	-2.17968	0	4	1	2	Distal Intergenic	1	47314290	47314401	112	2	ENSSSCT00000084905.1	-237888	ENSSSCG00000043187	ENSSSCG00000043187
chr1:47845167	chr1	47845167	S1_47845167	C	T	C	T	0.64286	0.35714	0	3	0.42857	T	0.3333	0.375	C	2	15750.4	1.612e-08	-0.425002	31500.7	6.04531e-09	-0.501339	0.283502	0.622618	5	0.999873	1.14681	1.14681e-05	12.5569	9.61171e-08	0.00146175	C/T/Y	0.0763376	0.926341	0	3	1	3	Distal Intergenic	1	48015404	48020566	5163	1	ENSSSCT00000088885.1	-170237	ENSSSCG00000050497	ENSSSCG00000050497
chr1:48251000	chr1	48251000	S1_48251000	A	G	A	G	0.5	0.5	0.28571	1	0.2	G	0.75	0.3333	A	2	1.67129	0.374352	0.694999	2.06806	0.287003	-1.22	1.27452	0.376122	3	0.625648	9.34241e-06	0.934241	5.53974	0.706414	1	A/G/R	1.915	0.525003	0	2	2	1	Distal Intergenic	1	48015404	48020566	5163	1	ENSSSCT00000088885.1	235596	ENSSSCG00000050497	ENSSSCG00000050497
chr1:48744335	chr1	48744335	S1_48744335	G	T	G	T	0.57143	0.42857	0	2	0.28571	T	0.1667	0.625	G	2	0.592475	0.595156	-0.476662	0.761127	0.432216	0.556665	0.305311	0.609995	5	0.228536	1.43285e-05	1.43285	12.7902	0.823633	1	G/T/K	-1.03333	-0.0800027	0	3	2	2	Intron (ENSSSCT00000073390.1/ENSSSCG00000047735.1, intron 2 of 2)	1	48755552	48759132	3581	1	ENSSSCT00000079776.1	-11217	ENSSSCG00000046711	ENSSSCG00000046711
chr1:48850737	chr1	48850737	S1_48850737	G	T	G	T	0.75	0.25	0.14286	1	0.16667	T	0.1667	0.3333	G	2	0.258753	0.787644	-0.399375	0.222969	0.669011	-1.10725	0.45038	0.550205	4	0.145575	1.29955	0.48615	11.7468	0.926341	1	G/T/K	0.707878	1.50663	0	4	1	1	Intron (ENSSSCT00000073390.1/ENSSSCG00000047735.1, intron 1 of 2)	1	48870497	48872159	1663	2	ENSSSCT00000089616.1	21422	ENSSSCG00000048270	ENSSSCG00000048270
chr1:49020967	chr1	49020967	S1_49020967	C	A	C	A	0.57143	0.42857	0	2	0.28571	A	0.1667	0.625	C	2	0.592475	0.595156	0.476662	0.761127	0.432216	0.556665	0.305311	0.609995	5	0.228536	1.43285e-05	1.43285	12.7902	0.823633	1	A/C/M	-0.0800027	-1.03333	0	2	3	2	Intron (ENSSSCT00000066143.2/ENSSSCG00000004270.4, intron 1 of 29)	1	49086341	49086447	107	2	ENSSSCT00000065620.1	65480	ENSSSCG00000038704	ENSSSCG00000038704
chr1:49351099	chr1	49351099	S1_49351099	G	A	A	G	0.5	0.5	0	3	0.42857	G	0.6667	0.375	A	2	0.092752	0.913323	0.25827	0.171345	0.700152	-0.119514	0.0137496	0.912307	5	0.0443206	0.289969	1.39035	13.5255	0.992746	1	A/G/R	0.377784	-0.138756	0	2	2	3	Intron (ENSSSCT00000066143.2/ENSSSCG00000004270.4, intron 15 of 29)	1	49165296	49167563	2268	2	ENSSSCT00000082019.1	-183536	ENSSSCG00000046970	ENSSSCG00000046970
chr1:49432327	chr1	49432327	S1_49432327	C	A	C	A	0.78571	0.21429	0	1	0.14286	A	0.3333	0.125	C	2	2.51906	0.195868	-0.707647	2.0745	0.223205	2.33826	4.38819	0.104264	5	0.55743	0.373335	0.359796	9.78334	0.526111	1	A/C/M	-3.04591	-1.63061	0	1	5	1	Intron (ENSSSCT00000066143.2/ENSSSCG00000004270.4, intron 15 of 29)	1	49165296	49167563	2268	2	ENSSSCT00000082019.1	-264764	ENSSSCG00000046970	ENSSSCG00000046970
chr1:49432376	chr1	49432376	S1_49432376	A	G	A	G	0.78571	0.21429	0	1	0.14286	G	0.3333	0.125	A	2	2.51906	0.195868	0.707647	2.0745	0.223205	2.33826	4.38819	0.104264	5	0.55743	0.373335	0.359796	9.78334	0.526111	1	A/G/R	-1.63061	-3.04591	0	5	1	1	Intron (ENSSSCT00000066143.2/ENSSSCG00000004270.4, intron 15 of 29)	1	49165296	49167563	2268	2	ENSSSCT00000082019.1	-264813	ENSSSCG00000046970	ENSSSCG00000046970
chr1:49446348	chr1	49446348	S1_49446348	T	A	T	A	0.7	0.3	0.28571	1	0.2	A	0.3333	0.25	T	2	2.07177	0.325545	-0.555843	1.03094	0.416786	2.43111	3.90126	0.186926	3	0.655924	0.724287	7.24287e-06	5.55434	0.676108	1	A/T/W	-2.98696	-1.87527	0	1	3	1	Intron (ENSSSCT00000066143.2/ENSSSCG00000004270.4, intron 15 of 29)	1	49165296	49167563	2268	2	ENSSSCT00000082019.1	-278785	ENSSSCG00000046970	ENSSSCG00000046970
chr1:49579566	chr1	49579566	S1_49579566	G	A	G	A	0.78571	0.21429	0	1	0.14286	A	0.3333	0.125	G	2	16599.7	1.4513e-08	-0.290623	0.222576	0.661668	1.14063	3.42835	0.137737	5	0.99988	1.08815	1.08815e-05	12.3445	9.56413e-08	0.00131602	A/G/R	-1.43125	-0.850003	0	1	5	1	Intron (ENSSSCT00000066143.2/ENSSSCG00000004270.4, intron 24 of 29)	1	49909458	49914260	4803	1	ENSSSCT00000079069.1	-329892	ENSSSCG00000050146	ENSSSCG00000050146
chr1:49937319	chr1	49937319	S1_49937319	C	A	C	A	0.58333	0.41667	0.14286	3	0.5	A	0.3333	0.5	C	2	0.164278	0.855654	0.450034	0.240637	0.657386	-0.554273	0.191739	0.691083	4	0.0984122	1.11385	0.809932	11.9598	0.963921	1	A/C/M	1.00431	0.104239	0	1	2	3	Intron (ENSSSCT00000004721.4/ENSSSCG00000004272.4, intron 5 of 16)	1	49909458	49914260	4803	1	ENSSSCT00000079069.1	27861	ENSSSCG00000050146	ENSSSCG00000050146
chr1:50099683	chr1	50099683	S1_50099683	C	T	C	T	0.57143	0.42857	0	4	0.57143	T	0.3333	0.5	C	2	0.240932	0.796531	0.178474	0.0735128	0.799706	0.389451	0.264141	0.634378	5	0.107514	1.17021	0.383088	13.6346	0.934858	1	C/T/Y	-0.210977	-0.567924	0	2	1	4	Intron (ENSSSCT00000074211.1/ENSSSCG00000044472.1, intron 4 of 51)	1	50045065	50399969	354905	1	ENSSSCT00000074211.1	54618	ENSSSCG00000044472	ENSSSCG00000044472
chr1:50743003	chr1	50743003	S1_50743003	T	C	T	C	0.78571	0.21429	0	1	0.14286	C	0	0.375	T	2	2.34076	0.21229	1.05186	3.73882	0.125295	0.35206	0.10417	0.763049	5	0.539251	0.351733	0.414167	9.90917	0.526111	1	C/T/Y	0.699803	-1.40392	0	1	5	1	Intron (ENSSSCT00000052276.2/ENSSSCG00000004276.4, intron 2 of 10)	1	50751899	50753945	2047	2	ENSSSCT00000079708.1	10942	ENSSSCG00000047243	ENSSSCG00000047243
chr1:50918204	chr1	50918204	S1_50918204	A	G	A	G	0.58333	0.41667	0.14286	3	0.5	G	0.5	0.3333	A	2	0.572287	0.615832	0.475691	0.316985	0.61276	1.05929	1.03505	0.383881	4	0.000287008	1.49081	1.49081e-05	11.4602	0.839353	1	A/G/R	-0.583596	-1.53498	0	2	1	3	Intron (ENSSSCT00000052276.2/ENSSSCG00000004276.4, intron 7 of 10)	1	51020869	51021963	1095	1	ENSSSCT00000069364.1	-102665	ENSSSCG00000043181	ENSSSCG00000043181
chr1:50982308	chr1	50982308	S1_50982308	C	T	C	T	0.57143	0.42857	0	4	0.57143	T	0.3333	0.5	C	2	0.240932	0.796531	0.178474	0.0735128	0.799706	0.389451	0.264141	0.634378	5	0.107514	1.17021	0.383088	13.6346	0.934858	1	C/T/Y	-0.210977	-0.567924	0	2	1	4	Intron (ENSSSCT00000024170.3/ENSSSCG00000026246.3, intron 2 of 3)	1	51020869	51021963	1095	1	ENSSSCT00000069364.1	-38561	ENSSSCG00000043181	ENSSSCG00000043181
chr1:50983258	chr1	50983258	S1_50983258	A	G	A	G	0.64286	0.35714	0	3	0.42857	G	0.1667	0.5	A	2	14610.8	1.87324e-08	-0.0350642	0.00579728	0.942964	0.885057	3.69338	0.127005	5	0.999863	1.23625	1.23625e-05	12.9765	1.06351e-07	0.00169864	A/G/R	-0.920121	-0.849993	0	3	1	3	Intron (ENSSSCT00000024170.3/ENSSSCG00000026246.3, intron 2 of 3)	1	51020869	51021963	1095	1	ENSSSCT00000069364.1	-37611	ENSSSCG00000043181	ENSSSCG00000043181
chr1:50983280	chr1	50983280	S1_50983280	C	T	C	T	0.64286	0.35714	0	3	0.42857	T	0.1667	0.5	C	2	14610.8	1.87324e-08	-0.0350642	0.00579728	0.942964	0.885057	3.69338	0.127005	5	0.999863	1.23625	1.23625e-05	12.9765	1.06351e-07	0.00169864	C/T/Y	-0.920121	-0.849993	0	3	1	3	Intron (ENSSSCT00000024170.3/ENSSSCG00000026246.3, intron 2 of 3)	1	51020869	51021963	1095	1	ENSSSCT00000069364.1	-37589	ENSSSCG00000043181	ENSSSCG00000043181
chr1:50983288	chr1	50983288	S1_50983288	C	T	C	T	0.64286	0.35714	0	3	0.42857	T	0.1667	0.5	C	2	14610.8	1.87324e-08	-0.0350642	0.00579728	0.942964	0.885057	3.69338	0.127005	5	0.999863	1.23625	1.23625e-05	12.9765	1.06351e-07	0.00169864	C/T/Y	-0.920121	-0.849993	0	3	1	3	Intron (ENSSSCT00000024170.3/ENSSSCG00000026246.3, intron 2 of 3)	1	51020869	51021963	1095	1	ENSSSCT00000069364.1	-37581	ENSSSCG00000043181	ENSSSCG00000043181
chr1:51031929	chr1	51031929	S1_51031929	T	C	T	C	0.64286	0.35714	0	3	0.42857	C	0.5	0.25	T	2	19236.7	1.08071e-08	-0.610379	1.12226	0.349164	1.46037	6.42397	0.0643521	5	0.999896	0.938997	9.38997e-06	11.1533	8.89569e-08	0.000979975	C/T/Y	-2.07075	-0.849989	0	1	3	3	Intron (ENSSSCT00000024170.3/ENSSSCG00000026246.3, intron 1 of 3)	1	50938250	51041584	103335	2	ENSSSCT00000024170.3	9655	ENSSSCG00000026246	ENSSSCG00000026246
chr1:51031946	chr1	51031946	S1_51031946	T	C	T	C	0.64286	0.35714	0	3	0.42857	C	0.5	0.25	T	2	19236.7	1.08071e-08	-0.610379	1.12226	0.349164	1.46037	6.42397	0.0643521	5	0.999896	0.938997	9.38997e-06	11.1533	8.89569e-08	0.000979975	C/T/Y	-2.07075	-0.849989	0	1	3	3	Intron (ENSSSCT00000024170.3/ENSSSCG00000026246.3, intron 1 of 3)	1	50938250	51041584	103335	2	ENSSSCT00000024170.3	9638	ENSSSCG00000026246	ENSSSCG00000026246
chr1:51032068	chr1	51032068	S1_51032068	G	A	G	A	0.64286	0.35714	0	3	0.42857	A	0.5	0.25	G	2	19236.7	1.08071e-08	-0.610379	1.12226	0.349164	1.46037	6.42397	0.0643521	5	0.999896	0.938997	9.38997e-06	11.1533	8.89569e-08	0.000979975	A/G/R	-2.07075	-0.849989	0	1	3	3	Intron (ENSSSCT00000024170.3/ENSSSCG00000026246.3, intron 1 of 3)	1	50938250	51041584	103335	2	ENSSSCT00000024170.3	9516	ENSSSCG00000026246	ENSSSCG00000026246
chr1:51032082	chr1	51032082	S1_51032082	A	G	A	G	0.64286	0.35714	0	3	0.42857	G	0.5	0.25	A	2	19236.7	1.08071e-08	0.610379	1.12226	0.349164	1.46037	6.42397	0.0643521	5	0.999896	0.938997	9.38997e-06	11.1533	8.89569e-08	0.000979975	A/G/R	-0.849989	-2.07075	0	3	1	3	Intron (ENSSSCT00000024170.3/ENSSSCG00000026246.3, intron 1 of 3)	1	50938250	51041584	103335	2	ENSSSCT00000024170.3	9502	ENSSSCG00000026246	ENSSSCG00000026246
chr1:51032096	chr1	51032096	S1_51032096	G	A	G	A	0.64286	0.35714	0	3	0.42857	A	0.5	0.25	G	2	19236.7	1.08071e-08	-0.610379	1.12226	0.349164	1.46037	6.42397	0.0643521	5	0.999896	0.938997	9.38997e-06	11.1533	8.89569e-08	0.000979975	A/G/R	-2.07075	-0.849989	0	1	3	3	Intron (ENSSSCT00000024170.3/ENSSSCG00000026246.3, intron 1 of 3)	1	50938250	51041584	103335	2	ENSSSCT00000024170.3	9488	ENSSSCG00000026246	ENSSSCG00000026246
chr1:51032100	chr1	51032100	S1_51032100	T	C	T	C	0.64286	0.35714	0	3	0.42857	C	0.5	0.25	T	2	19236.7	1.08071e-08	-0.610379	1.12226	0.349164	1.46037	6.42397	0.0643521	5	0.999896	0.938997	9.38997e-06	11.1533	8.89569e-08	0.000979975	C/T/Y	-2.07075	-0.849989	0	1	3	3	Intron (ENSSSCT00000024170.3/ENSSSCG00000026246.3, intron 1 of 3)	1	50938250	51041584	103335	2	ENSSSCT00000024170.3	9484	ENSSSCG00000026246	ENSSSCG00000026246
chr1:51032108	chr1	51032108	S1_51032108	C	T	C	T	0.64286	0.35714	0	3	0.42857	T	0.5	0.25	C	2	19236.7	1.08071e-08	0.610379	1.12226	0.349164	1.46037	6.42397	0.0643521	5	0.999896	0.938997	9.38997e-06	11.1533	8.89569e-08	0.000979975	C/T/Y	-0.849989	-2.07075	0	3	1	3	Intron (ENSSSCT00000024170.3/ENSSSCG00000026246.3, intron 1 of 3)	1	50938250	51041584	103335	2	ENSSSCT00000024170.3	9476	ENSSSCG00000026246	ENSSSCG00000026246
chr1:51278552	chr1	51278552	S1_51278552	G	T	G	T	0.66667	0.33333	0.14286	2	0.33333	T	0.1667	0.5	G	2	0.360047	0.724187	-0.647124	0.629895	0.485374	0.038844	0.000905673	0.977882	4	0.193569	0.121085	1.8298	11.7592	0.886228	1	G/T/K	-0.685968	0.60828	0	3	1	2	Promoter (1-2kb)	1	51275841	51276888	1048	2	ENSSSCT00000078652.1	-1664	ENSSSCG00000043325	ENSSSCG00000043325
chr1:51278592	chr1	51278592	S1_51278592	G	C	G	C	0.66667	0.33333	0.14286	2	0.33333	C	0.1667	0.5	G	2	0.360047	0.724187	0.647124	0.629895	0.485374	0.038844	0.000905673	0.977882	4	0.193569	0.121085	1.8298	11.7592	0.886228	1	C/G/S	0.60828	-0.685968	0	1	3	2	Promoter (1-2kb)	1	51275841	51276888	1048	2	ENSSSCT00000078652.1	-1704	ENSSSCG00000043325	ENSSSCG00000043325
chr1:51278594	chr1	51278594	S1_51278594	A	C	A	C	0.66667	0.33333	0.14286	2	0.33333	C	0.1667	0.5	A	2	0.360047	0.724187	-0.647124	0.629895	0.485374	0.038844	0.000905673	0.977882	4	0.193569	0.121085	1.8298	11.7592	0.886228	1	A/C/M	-0.685968	0.60828	0	3	1	2	Promoter (1-2kb)	1	51275841	51276888	1048	2	ENSSSCT00000078652.1	-1706	ENSSSCG00000043325	ENSSSCG00000043325
chr1:51299370	chr1	51299370	S1_51299370	G	A	G	A	0.71429	0.28571	0	2	0.28571	A	0.5	0.125	G	2	0.766158	0.522765	-0.805458	1.50351	0.28738	0.731483	0.411947	0.555916	5	0.276975	0.883362	0.350204	11.5905	0.789352	1	A/G/R	-1.53694	0.0739742	0	1	4	2	Distal Intergenic	1	51313003	51326044	13042	1	ENSSSCT00000004729.4	-13633	ENSSSCG00000004279	ENSSSCG00000004279
chr1:51461949	chr1	51461949	S1_51461949	T	C	C	T	0.57143	0.42857	0	4	0.57143	T	0.3333	0.5	C	2	18868.2	1.12333e-08	-1.17419	3.0987	0.153161	-0.3242	0.236222	0.652373	5	0.999894	0.957333	9.57333e-06	11.0749	8.89569e-08	0.00101862	C/T/Y	-0.84999	1.49839	0	2	1	4	Distal Intergenic	1	51448674	51448808	135	2	ENSSSCT00000022139.2	-13141	ENSSSCG00000020544	ENSSSCG00000020544
chr1:51461954	chr1	51461954	S1_51461954	C	A	A	C	0.57143	0.42857	0	4	0.57143	C	0.3333	0.5	A	2	18868.2	1.12333e-08	-1.17419	3.0987	0.153161	-0.3242	0.236222	0.652373	5	0.999894	0.957333	9.57333e-06	11.0749	8.89569e-08	0.00101862	A/C/M	-0.84999	1.49839	0	2	1	4	Distal Intergenic	1	51448674	51448808	135	2	ENSSSCT00000022139.2	-13146	ENSSSCG00000020544	ENSSSCG00000020544
chr1:51542482	chr1	51542482	S1_51542482	G	T	T	G	0.7	0.3	0.28571	1	0.2	G	0.5	0.25	T	2	6.30421	0.136907	0.55	3.20329	0.215381	-2.1	11.6748	0.0760164	3	0.863093	2.83299e-06	0.283299	3.15326	0.446923	1	G/T/K	2.65	1.55	0	1	3	1	Distal Intergenic	1	51448674	51448808	135	2	ENSSSCT00000022139.2	-93674	ENSSSCG00000020544	ENSSSCG00000020544
chr1:51552318	chr1	51552318	S1_51552318	T	A	T	A	0.6	0.4	0.28571	2	0.4	A	0.75	0.1667	T	2	2.34909	0.298589	-0.985527	4.21718	0.176404	-0.00545374	4.58139e-05	0.995214	3	0.669023	0.587559	5.87559e-06	5.03304	0.632759	1	A/T/W	-0.980073	0.990981	0	1	2	2	Distal Intergenic	1	51448674	51448808	135	2	ENSSSCT00000022139.2	-103510	ENSSSCG00000020544	ENSSSCG00000020544
chr1:51810936	chr1	51810936	S1_51810936	A	G	A	G	0.64286	0.35714	0	3	0.42857	G	0.1667	0.5	A	2	0.207882	0.820556	-0.10541	0.0200727	0.894183	0.570779	0.290717	0.618372	5	0.0941544	0.0223528	1.65216	13.4244	0.940348	1	A/G/R	-0.676189	-0.465369	0	3	1	3	Intron (ENSSSCT00000004730.4/ENSSSCG00000004280.4, intron 1 of 30)	1	51828437	51828524	88	2	ENSSSCT00000020035.3	17588	ENSSSCG00000018440	ENSSSCG00000018440
chr1:51946556	chr1	51946556	S1_51946556	T	C	T	C	0.64286	0.35714	0	3	0.42857	C	0.3333	0.375	T	2	17376.1	1.3245e-08	-0.424997	34751	4.96744e-09	-0.762639	0.801552	0.421236	5	0.999885	1.03953	1.03953e-05	12.2662	9.49144e-08	0.00120105	C/T/Y	0.337642	1.18764	0	1	3	3	Intron (ENSSSCT00000004730.4/ENSSSCG00000004280.4, intron 2 of 30)	1	51941782	51941888	107	1	ENSSSCT00000055965.1	4774	ENSSSCG00000034571	ENSSSCG00000034571
chr1:52333297	chr1	52333297	S1_52333297	C	T	C	T	0.71429	0.28571	0	2	0.28571	T	0.5	0.125	C	2	0.766158	0.522765	0.805458	1.50351	0.28738	0.731483	0.411947	0.555916	5	0.276975	0.883362	0.350204	11.5905	0.789352	1	C/T/Y	0.0739742	-1.53694	0	4	1	2	Distal Intergenic	1	52435434	52939701	504268	1	ENSSSCT00000038363.2	-102137	ENSSSCG00000004281	ENSSSCG00000004281
chr1:52660682	chr1	52660682	S1_52660682	T	A	A	T	0.6	0.4	0.28571	2	0.4	T	0.25	0.5	A	2	0.230419	0.812731	-0.445614	0.387683	0.597051	-0.314096	0.0625333	0.825877	3	0.178622	1.59928	1.59928e-05	7.24631	0.940273	1	A/T/W	-0.131519	0.75971	0	2	1	2	Intron (ENSSSCT00000038363.2/ENSSSCG00000004281.4, intron 1 of 13)	1	52725754	52731611	5858	2	ENSSSCT00000076463.1	70929	ENSSSCG00000046325	ENSSSCG00000046325
chr1:52943274	chr1	52943274	S1_52943274	A	C	A	C	0.71429	0.28571	0	2	0.28571	C	0.5	0.125	A	2	0.766158	0.522765	0.805458	1.50351	0.28738	0.731483	0.411947	0.555916	5	0.276975	0.883362	0.350204	11.5905	0.789352	1	A/C/M	0.0739742	-1.53694	0	4	1	2	Downstream (1-2kb)	1	52944276	52950813	6538	2	ENSSSCT00000080062.1	7539	ENSSSCG00000049177	ENSSSCG00000049177
chr1:53079510	chr1	53079510	S1_53079510	T	C	T	C	0.71429	0.28571	0	2	0.28571	C	0.5	0.125	T	2	0.305122	0.752787	-0.292644	0.161774	0.708094	0.725051	0.597658	0.482618	5	0.132367	1.17162	0.353887	13.2524	0.906269	1	C/T/Y	-1.0177	-0.432407	0	1	4	2	Distal Intergenic	1	53091419	53191212	99794	1	ENSSSCT00000037924.2	-11909	ENSSSCG00000022994	ENSSSCG00000022994
chr1:53079542	chr1	53079542	S1_53079542	C	A	C	A	0.57143	0.42857	0	2	0.28571	A	0	0.75	C	2	94060.2	4.52095e-10	0.653049	12.8788	0.0229884	1.50305	68.2186	0.00117234	5	0.999979	0.192055	1.92055e-06	5.23555	6.4428e-09	4.09955e-05	A/C/M	-0.849999	-2.1561	0	2	3	2	Distal Intergenic	1	53091419	53191212	99794	1	ENSSSCT00000037924.2	-11877	ENSSSCG00000022994	ENSSSCG00000022994
chr1:53109400	chr1	53109400	S1_53109400	T	C	T	C	0.71429	0.28571	0	2	0.28571	C	0.5	0.125	T	2	0.305122	0.752787	-0.292644	0.161774	0.708094	0.725051	0.597658	0.482618	5	0.132367	1.17162	0.353887	13.2524	0.906269	1	C/T/Y	-1.0177	-0.432407	0	1	4	2	Intron (ENSSSCT00000037924.2/ENSSSCG00000022994.3, intron 4 of 18)	1	53092103	53191212	99110	1	ENSSSCT00000030777.3	17297	ENSSSCG00000022994	ENSSSCG00000022994
chr1:53109418	chr1	53109418	S1_53109418	A	G	A	G	0.71429	0.28571	0	2	0.28571	G	0.5	0.125	A	2	0.305122	0.752787	0.292644	0.161774	0.708094	0.725051	0.597658	0.482618	5	0.132367	1.17162	0.353887	13.2524	0.906269	1	A/G/R	-0.432407	-1.0177	0	4	1	2	Intron (ENSSSCT00000037924.2/ENSSSCG00000022994.3, intron 4 of 18)	1	53092103	53191212	99110	1	ENSSSCT00000030777.3	17315	ENSSSCG00000022994	ENSSSCG00000022994
chr1:53109440	chr1	53109440	S1_53109440	G	A	G	A	0.57143	0.42857	0	2	0.28571	A	0	0.75	G	2	94060.2	4.52095e-10	0.653049	12.8788	0.0229884	1.50305	68.2186	0.00117234	5	0.999979	0.192055	1.92055e-06	5.23555	6.4428e-09	4.09955e-05	A/G/R	-0.849999	-2.1561	0	2	3	2	Intron (ENSSSCT00000037924.2/ENSSSCG00000022994.3, intron 4 of 18)	1	53092103	53191212	99110	1	ENSSSCT00000030777.3	17337	ENSSSCG00000022994	ENSSSCG00000022994
chr1:53270928	chr1	53270928	S1_53270928	C	G	C	G	0.7	0.3	0.28571	1	0.2	G	1	0.125	C	2	8.34246	0.107038	0.955	9.65781	0.0898126	2.055	11.1798	0.0789938	3	0.892962	2.83299e-06	0.283299	3.15326	0.363362	1	C/G/S	-1.1	-3.01	0	3	1	1	Intron (ENSSSCT00000025979.3/ENSSSCG00000026943.3, intron 1 of 3)	1	53275692	53279510	3819	2	ENSSSCT00000070732.1	8582	ENSSSCG00000044858	ENSSSCG00000044858
chr1:53281445	chr1	53281445	S1_53281445	T	C	T	C	0.58333	0.41667	0.14286	3	0.5	C	0.25	0.5	T	2	0.283549	0.771275	0.0224962	0.000938645	0.977483	0.729165	0.522063	0.522195	4	0.15898	1.43776e-05	1.43776	10.8193	0.91773	1	C/T/Y	-0.706669	-0.751661	0	1	2	3	Promoter (1-2kb)	1	53275692	53279510	3819	2	ENSSSCT00000070732.1	-1935	ENSSSCG00000044858	ENSSSCG00000044858
chr1:53281477	chr1	53281477	S1_53281477	C	T	C	T	0.58333	0.41667	0.14286	3	0.5	T	0.25	0.5	C	2	0.283549	0.771275	-0.0224962	0.000938645	0.977483	0.729165	0.522063	0.522195	4	0.15898	1.43776e-05	1.43776	10.8193	0.91773	1	C/T/Y	-0.751661	-0.706669	0	2	1	3	Promoter (1-2kb)	1	53275692	53279510	3819	2	ENSSSCT00000070732.1	-1967	ENSSSCG00000044858	ENSSSCG00000044858
chr1:53302985	chr1	53302985	S1_53302985	C	T	C	T	0.57143	0.42857	0	2	0.28571	T	0	0.75	C	2	94060.2	4.52095e-10	-0.653049	12.8788	0.0229884	1.50305	68.2186	0.00117234	5	0.999979	0.192055	1.92055e-06	5.23555	6.4428e-09	4.09955e-05	C/T/Y	-2.1561	-0.849999	0	3	2	2	Intron (ENSSSCT00000025979.3/ENSSSCG00000026943.3, intron 2 of 3)	1	53275692	53279510	3819	2	ENSSSCT00000070732.1	-23475	ENSSSCG00000044858	ENSSSCG00000044858
chr1:53487748	chr1	53487748	S1_53487748	A	G	A	G	0.5	0.5	0	1	0.14286	A	1	0.125	G	2	15.8361	0.0125736	-0.773333	17.2291	0.0142511	1.87333	14.4431	0.019097	5	0.887868	2.08265e-06	0.208265	5.07577	0.0563183	1	A/G/R	-2.64667	-1.1	0	3	3	1	Distal Intergenic	1	53332433	53442399	109967	2	ENSSSCT00000087532.1	-45349	ENSSSCG00000004289	ENSSSCG00000004289
chr1:53943179	chr1	53943179	S1_53943179	G	A	G	A	0.71429	0.28571	0	2	0.28571	A	0.3333	0.25	G	2	4.71172	0.0887958	-0.572582	1.93093	0.237003	2.08104	9.33159	0.0378515	5	0.702014	0.0794798	0.447687	8.74507	0.308172	1	A/G/R	-2.65362	-1.50845	0	1	4	2	Downstream (2-3kb)	1	53958105	53962020	3916	2	ENSSSCT00000069538.1	18841	ENSSSCG00000041113	ENSSSCG00000041113
chr1:54055492	chr1	54055492	S1_54055492	A	G	A	G	0.64286	0.35714	0	3	0.42857	G	0	0.625	A	2	138078	2.09798e-10	-0.56248	14.0252	0.0200334	1.41248	88.4396	0.000712541	5	0.999986	0.130831	1.30831e-06	3.98773	3.01876e-09	1.90242e-05	A/G/R	-1.97496	-0.850003	0	3	1	3	Distal Intergenic	1	54082615	54088813	6199	2	ENSSSCT00000044309.2	33321	ENSSSCG00000035731	ENSSSCG00000035731
chr1:54055493	chr1	54055493	S1_54055493	G	C	G	C	0.64286	0.35714	0	3	0.42857	C	0	0.625	G	2	138078	2.09798e-10	0.56248	14.0252	0.0200334	1.41248	88.4396	0.000712541	5	0.999986	0.130831	1.30831e-06	3.98773	3.01876e-09	1.90242e-05	C/G/S	-0.850003	-1.97496	0	1	3	3	Distal Intergenic	1	54082615	54088813	6199	2	ENSSSCT00000044309.2	33320	ENSSSCG00000035731	ENSSSCG00000035731
chr1:54055625	chr1	54055625	S1_54055625	G	C	G	C	0.64286	0.35714	0	3	0.42857	C	0	0.625	G	2	138078	2.09798e-10	0.56248	14.0252	0.0200334	1.41248	88.4396	0.000712541	5	0.999986	0.130831	1.30831e-06	3.98773	3.01876e-09	1.90242e-05	C/G/S	-0.850003	-1.97496	0	1	3	3	Distal Intergenic	1	54082615	54088813	6199	2	ENSSSCT00000044309.2	33188	ENSSSCG00000035731	ENSSSCG00000035731
chr1:54293505	chr1	54293505	S1_54293505	A	G	A	G	0.5	0.5	0.14286	2	0.33333	A	0.8333	0.1667	G	2	2.70421	0.213113	-1.05	4.99969	0.111374	-0.519996	0.408738	0.568081	4	0.643215	8.82042e-06	0.882042	9.35351	0.526111	1	A/G/R	-0.530004	1.57	0	2	2	2	Distal Intergenic	1	54400810	54448742	47933	1	ENSSSCT00000034230.3	-107305	ENSSSCG00000004291	ENSSSCG00000004291
chr1:54302882	chr1	54302882	S1_54302882	T	A	T	A	0.66667	0.33333	0.14286	2	0.33333	A	0.1667	0.5	T	2	0.176451	0.846351	0.518198	0.347832	0.596816	-0.360969	0.0717829	0.806124	4	0.105119	0.934407	1.00739	11.9071	0.957201	1	A/T/W	0.879167	-0.157229	0	1	3	2	Distal Intergenic	1	54400810	54448742	47933	1	ENSSSCT00000034230.3	-97928	ENSSSCG00000004291	ENSSSCG00000004291
chr1:54302932	chr1	54302932	S1_54302932	C	G	C	G	0.66667	0.33333	0.14286	2	0.33333	G	0.1667	0.5	C	2	0.176451	0.846351	-0.518198	0.347832	0.596816	-0.360969	0.0717829	0.806124	4	0.105119	0.934407	1.00739	11.9071	0.957201	1	C/G/S	-0.157229	0.879167	0	3	1	2	Distal Intergenic	1	54400810	54448742	47933	1	ENSSSCT00000034230.3	-97878	ENSSSCG00000004291	ENSSSCG00000004291
chr1:54368948	chr1	54368948	S1_54368948	C	T	C	T	0.75	0.25	0.14286	1	0.16667	T	0.5	0	C	2	2.94583	0.195978	0.995266	3.96549	0.140499	-0.639207	0.363423	0.589135	4	0.000688628	0.694898	6.94898e-06	9.13556	0.526111	1	C/T/Y	1.63447	-0.356059	0	4	1	1	Distal Intergenic	1	54400810	54448742	47933	1	ENSSSCT00000034230.3	-31862	ENSSSCG00000004291	ENSSSCG00000004291
chr1:54369007	chr1	54369007	S1_54369007	C	T	C	T	0.75	0.25	0.14286	1	0.16667	T	0.5	0	C	2	2.94583	0.195978	0.995266	3.96549	0.140499	-0.639207	0.363423	0.589135	4	0.000688628	0.694898	6.94898e-06	9.13556	0.526111	1	C/T/Y	1.63447	-0.356059	0	4	1	1	Distal Intergenic	1	54400810	54448742	47933	1	ENSSSCT00000034230.3	-31803	ENSSSCG00000004291	ENSSSCG00000004291
chr1:54395296	chr1	54395296	S1_54395296	A	G	A	G	0.57143	0.42857	0	4	0.57143	G	0.1667	0.625	A	2	22749.1	7.7278e-09	-0.368282	0.815028	0.417688	1.21828	8.91853	0.0404822	5	0.999912	0.794032	7.94032e-06	11.1232	7.34443e-08	0.000700749	A/G/R	-1.58656	-0.849995	0	2	1	4	Distal Intergenic	1	54400810	54448742	47933	1	ENSSSCT00000034230.3	-5514	ENSSSCG00000004291	ENSSSCG00000004291
chr1:54395310	chr1	54395310	S1_54395310	A	G	A	G	0.57143	0.42857	0	4	0.57143	G	0.1667	0.625	A	2	22749.1	7.7278e-09	-0.368282	0.815028	0.417688	1.21828	8.91853	0.0404822	5	0.999912	0.794032	7.94032e-06	11.1232	7.34443e-08	0.000700749	A/G/R	-1.58656	-0.849995	0	2	1	4	Distal Intergenic	1	54400810	54448742	47933	1	ENSSSCT00000034230.3	-5500	ENSSSCG00000004291	ENSSSCG00000004291
chr1:54395317	chr1	54395317	S1_54395317	G	A	G	A	0.71429	0.28571	0	2	0.28571	A	0.5	0.125	G	2	0.305122	0.752787	-0.292644	0.161774	0.708094	0.725051	0.597658	0.482618	5	0.132367	1.17162	0.353887	13.2524	0.906269	1	A/G/R	-1.0177	-0.432407	0	1	4	2	Distal Intergenic	1	54400810	54448742	47933	1	ENSSSCT00000034230.3	-5493	ENSSSCG00000004291	ENSSSCG00000004291
chr1:54415122	chr1	54415122	S1_54415122	A	G	A	G	0.71429	0.28571	0	2	0.28571	G	0.3333	0.25	A	2	4.71172	0.0887958	0.572582	1.93093	0.237003	2.08104	9.33159	0.0378515	5	0.702014	0.0794798	0.447687	8.74507	0.308172	1	A/G/R	-1.50845	-2.65362	0	4	1	2	Intron (ENSSSCT00000034230.3/ENSSSCG00000004291.5, intron 1 of 8)	1	54400810	54448742	47933	1	ENSSSCT00000072631.1	14312	ENSSSCG00000004291	ENSSSCG00000004291
chr1:54422273	chr1	54422273	S1_54422273	A	C	A	C	0.5	0.5	0	1	0.14286	A	1	0.125	C	2	6.54473	0.0547852	-0.916665	11.5971	0.0271408	0.870007	1.49238	0.28892	5	0.765938	4.34728e-06	0.434728	8.01942	0.209314	1	A/C/M	-1.78667	0.0466573	0	3	3	1	Intron (ENSSSCT00000034230.3/ENSSSCG00000004291.5, intron 2 of 8)	1	54400810	54448742	47933	1	ENSSSCT00000072631.1	21463	ENSSSCG00000004291	ENSSSCG00000004291
chr1:54762388	chr1	54762388	S1_54762388	A	C	C	A	0.58333	0.41667	0.14286	1	0.16667	A	0.5	0.3333	C	2	1.30053	0.391991	-0.378693	0.567588	0.505953	-1.63377	1.67004	0.286794	4	0.000482626	1.10315	1.10315e-05	10.5711	0.719332	1	A/C/M	1.25507	2.01246	0	2	3	1	Distal Intergenic	1	54859629	54861032	1404	1	ENSSSCT00000078240.1	-97241	ENSSSCG00000043097	ENSSSCG00000043097
chr1:54880908	chr1	54880908	S1_54880908	G	T	G	T	0.5	0.5	0	5	0.71429	T	0.6667	0.375	G	2	0.331601	0.735786	0.150394	0.0371106	0.856625	0.686943	0.634242	0.470397	5	0.14222	0.991962	0.454952	13.3319	0.896851	1	G/T/K	-0.536549	-0.837337	0	1	1	5	Distal Intergenic	1	54859629	54861032	1404	1	ENSSSCT00000078240.1	21279	ENSSSCG00000043097	ENSSSCG00000043097
chr1:54991682	chr1	54991682	S1_54991682	T	C	C	T	0.5	0.5	0	5	0.71429	C	0.6667	0.375	T	2	18358.8	1.18652e-08	-0.465552	0.623078	0.474062	1.31554	4.97521	0.0895595	5	0.999891	0.983893	9.83893e-06	11.9279	8.89569e-08	0.00107593	C/T/Y	-1.78109	-0.849991	0	1	1	5	Promoter (2-3kb)	1	54985642	54988780	3139	2	ENSSSCT00000081072.1	-2902	ENSSSCG00000051082	ENSSSCG00000051082
chr1:54991714	chr1	54991714	S1_54991714	T	C	T	C	0.57143	0.42857	0	4	0.57143	C	0.3333	0.5	T	2	0.105784	0.902054	0.112496	0.019131	0.896675	0.407497	0.150613	0.71772	5	0.0502348	1.76402e-05	1.76402	13.6219	0.986747	1	C/T/Y	-0.295002	-0.519993	0	1	2	4	Promoter (2-3kb)	1	54985642	54988780	3139	2	ENSSSCT00000081072.1	-2934	ENSSSCG00000051082	ENSSSCG00000051082
chr1:54992423	chr1	54992423	S1_54992423	C	T	C	T	0.66667	0.33333	0.14286	2	0.33333	T	0.25	0.375	C	2	11446.7	1.49979e-06	0.424997	22893.1	6.3657e-07	-0.525834	0.171678	0.706469	4	0.999869	1.57797	1.57797e-05	11.5507	7.12116e-06	0.136	C/T/Y	0.950831	0.100838	0	3	1	2	Distal Intergenic	1	54985642	54988780	3139	2	ENSSSCT00000081072.1	-3643	ENSSSCG00000051082	ENSSSCG00000051082
chr1:54992425	chr1	54992425	S1_54992425	G	A	G	A	0.66667	0.33333	0.14286	2	0.33333	A	0.25	0.375	G	2	11446.7	1.49979e-06	-0.424997	22893.1	6.3657e-07	-0.525834	0.171678	0.706469	4	0.999869	1.57797	1.57797e-05	11.5507	7.12116e-06	0.136	A/G/R	0.100838	0.950831	0	1	3	2	Distal Intergenic	1	54985642	54988780	3139	2	ENSSSCT00000081072.1	-3645	ENSSSCG00000051082	ENSSSCG00000051082
chr1:54992468	chr1	54992468	S1_54992468	T	C	T	C	0.66667	0.33333	0.14286	2	0.33333	C	0.25	0.375	T	2	11446.7	1.49979e-06	-0.424997	22893.1	6.3657e-07	-0.525834	0.171678	0.706469	4	0.999869	1.57797	1.57797e-05	11.5507	7.12116e-06	0.136	C/T/Y	0.100838	0.950831	0	1	3	2	Distal Intergenic	1	54985642	54988780	3139	2	ENSSSCT00000081072.1	-3688	ENSSSCG00000051082	ENSSSCG00000051082
chr1:55040140	chr1	55040140	S1_55040140	T	C	C	T	0.5	0.5	0	3	0.42857	T	0.5	0.5	C	2	15924.3	1.577e-08	0.477135	0.844529	0.410107	0.372865	0.515729	0.512379	5	0.999874	1.13429	1.13429e-05	12.0186	9.61171e-08	0.00143001	C/T/Y	0.10427	-0.850001	0	2	2	3	Distal Intergenic	1	54985642	54988780	3139	2	ENSSSCT00000081072.1	-51360	ENSSSCG00000051082	ENSSSCG00000051082
chr1:55040167	chr1	55040167	S1_55040167	A	G	A	G	0.5	0.5	0	3	0.42857	A	0.5	0.5	G	2	15924.3	1.577e-08	-0.477135	0.844529	0.410107	0.372865	0.515729	0.512379	5	0.999874	1.13429	1.13429e-05	12.0186	9.61171e-08	0.00143001	A/G/R	-0.850001	0.10427	0	2	2	3	Distal Intergenic	1	54985642	54988780	3139	2	ENSSSCT00000081072.1	-51387	ENSSSCG00000051082	ENSSSCG00000051082
chr1:55119115	chr1	55119115	S1_55119115	G	A	A	G	0.5	0.5	0	5	0.71429	A	0.6667	0.375	G	2	0.331601	0.735786	-0.150394	0.0371106	0.856625	0.686943	0.634242	0.470397	5	0.14222	0.991962	0.454952	13.3319	0.896851	1	A/G/R	-0.837337	-0.536549	0	1	1	5	Intron (ENSSSCT00000066631.1/ENSSSCG00000041259.1, intron 2 of 2)	1	55174072	55174197	126	1	ENSSSCT00000021516.2	-54957	ENSSSCG00000019921	ENSSSCG00000019921
chr1:55312594	chr1	55312594	S1_55312594	A	G	G	A	0.57143	0.42857	0	4	0.57143	A	0.5	0.375	G	2	19001.2	1.10766e-08	-0.0850795	0.0218345	0.889678	0.935086	2.63747	0.179693	5	0.999895	0.950632	9.50632e-06	11.334	8.89569e-08	0.00100441	A/G/R	-1.02017	-0.850006	0	1	2	4	Distal Intergenic	1	55265751	55269652	3902	2	ENSSSCT00000070184.1	-42942	ENSSSCG00000043035	ENSSSCG00000043035
chr1:55313426	chr1	55313426	S1_55313426	A	C	A	C	0.57143	0.42857	0	2	0.28571	C	0.5	0.375	A	2	16028.7	1.55653e-08	0.425001	32057.3	5.83723e-09	0.227027	0.0478249	0.837597	5	0.999875	1.12691	1.12691e-05	11.9865	9.61171e-08	0.00141144	A/C/M	0.197974	-0.652029	0	3	2	2	Distal Intergenic	1	55265751	55269652	3902	2	ENSSSCT00000070184.1	-43774	ENSSSCG00000043035	ENSSSCG00000043035
chr1:55322606	chr1	55322606	S1_55322606	T	C	T	C	0.75	0.25	0.14286	1	0.16667	C	0.3333	0.1667	T	2	2.24717	0.253268	-0.70903	1.67019	0.286776	2.31523	3.96054	0.140669	4	0.599679	0.166533	0.76712	9.58525	0.578769	1	C/T/Y	-3.02426	-1.6062	0	1	4	1	Distal Intergenic	1	55265751	55269652	3902	2	ENSSSCT00000070184.1	-52954	ENSSSCG00000043035	ENSSSCG00000043035
chr1:55322651	chr1	55322651	S1_55322651	C	A	C	A	0.75	0.25	0.14286	1	0.16667	A	0.3333	0.1667	C	2	2.24717	0.253268	-0.70903	1.67019	0.286776	2.31523	3.96054	0.140669	4	0.599679	0.166533	0.76712	9.58525	0.578769	1	A/C/M	-3.02426	-1.6062	0	1	4	1	Distal Intergenic	1	55265751	55269652	3902	2	ENSSSCT00000070184.1	-52999	ENSSSCG00000043035	ENSSSCG00000043035
chr1:55322679	chr1	55322679	S1_55322679	G	A	G	A	0.75	0.25	0.14286	1	0.16667	A	0.3333	0.1667	G	2	2.24717	0.253268	-0.70903	1.67019	0.286776	2.31523	3.96054	0.140669	4	0.599679	0.166533	0.76712	9.58525	0.578769	1	A/G/R	-3.02426	-1.6062	0	1	4	1	Distal Intergenic	1	55265751	55269652	3902	2	ENSSSCT00000070184.1	-53027	ENSSSCG00000043035	ENSSSCG00000043035
chr1:55322853	chr1	55322853	S1_55322853	T	A	A	T	0.5	0.5	0	3	0.42857	T	0.5	0.5	A	2	15924.3	1.577e-08	-0.477135	0.844529	0.410107	0.372865	0.515729	0.512379	5	0.999874	1.13429	1.13429e-05	12.0186	9.61171e-08	0.00143001	A/T/W	-0.850001	0.10427	0	2	2	3	Distal Intergenic	1	55265751	55269652	3902	2	ENSSSCT00000070184.1	-53201	ENSSSCG00000043035	ENSSSCG00000043035
chr1:55322900	chr1	55322900	S1_55322900	A	G	A	G	0.78571	0.21429	0	1	0.14286	G	0.1667	0.25	A	2	2.51906	0.195868	-0.815307	2.34755	0.200245	-2.2306	4.4399	0.102825	5	0.55743	0.373335	0.359796	9.78334	0.526111	1	A/G/R	1.41529	3.04591	0	5	1	1	Distal Intergenic	1	55265751	55269652	3902	2	ENSSSCT00000070184.1	-53248	ENSSSCG00000043035	ENSSSCG00000043035
chr1:55322906	chr1	55322906	S1_55322906	G	A	G	A	0.64286	0.35714	0	3	0.42857	A	0.5	0.25	G	2	13294.2	2.26258e-08	-0.145207	0.0445013	0.843235	0.995193	2.09024	0.22177	5	0.99985	1.35866	1.35866e-05	12.6448	1.22518e-07	0.00205169	A/G/R	-1.1404	-0.849986	0	1	3	3	Distal Intergenic	1	55265751	55269652	3902	2	ENSSSCT00000070184.1	-53254	ENSSSCG00000043035	ENSSSCG00000043035
[truncated: 41,916 more rows]
[truncated: 9 more columns]

## Sheet: Spreadsheet S2
Sample_number	ID	Sample_ID	Sample_id	Insem	FR	LS	Fertility	Treatment	Replicate	CollectionCode	CollectionDate	week	Season	Correl FR and LS	Correl FR and LS
[truncated: 39 more rows]

## Sheet: Spreadsheet S3
Test	Location	chr	start	end	logFC	AveExpr	t	P.Value	adj.P.Val	B	annotation	geneChr	geneStart	geneEnd	geneLength	geneStrand	transcriptId	distanceToTSS	geneId	original_id	external_gene_name	EntrezID	description	CG	CCGG	seq
[truncated: 11,115 more rows]

[truncated: 1 more sheets: Spreadsheet S4]
