# Supplementary material for: Sperm Methylome Profiling Can Discern Fertility Levels in the Porcine Biomedical Model
Source: Int J Mol Sci. 2021 Mar 6;22(5):2679. doi: 10.3390/ijms22052679 (PMC7961483; doi:10.3390/ijms22052679)
Supplement: Supplementary file 1 [file ijms-22-02679-s001.zip › supp for conversion final/Tables S1 S2_20210305.xlsx]

## Sheet: Table S1
Number of individuals	Number of counts
0	5
1	599
2	3347
3	1875
4	780
5	381
6	201
7	124
8	80
9	72
10	36
11	31
12	26
13	15
14	26
15	8
16	10
17	14
18	11
19	6
20	12
21	6
22	8
23	3
24	9
25	6
31	6
32	9
33	5
34	10
35	9
36	7
37	14
38	18
39	24

## Sheet: Table S2
SusScrofa GBS							SusScrofa GBS+MEDIP
Sample_ID	Treatment	Depth	bp Sequenced	Breadth (bp Sequenced/depth)	% of susScr11.1		Sample_ID	Treatment	Depth	bp Sequenced	Breadth (bp Sequenced/depth)	% of susScr11.1
UN_12	U	17.3002	904377780	5.22756e+07	2.10921		UN_12	U	16.7448	129055937	7.70722e+06	0.31097
UN_17	U	21.6264	1029994750	4.76267e+07	1.92164		UN_17	U	19.4224	137709452	7.09024e+06	0.286076
UN_20	U	17.303	605393511	3.49878e+07	1.41168		UN_20	U	19.9447	99441361	4.98585e+06	0.201169
UN_32	U	18.5694	903209622	4.86397e+07	1.96251		UN_32	U	18.0904	154401101	8.53497e+06	0.344368
UN_7	U	16.5984	703043038	4.23561e+07	1.70898		UN_7	U	19.4624	129301026	6.64363e+06	0.268057
UN_10	U	14.9139	486875137	3.26457e+07	1.31719		UN_10	U	23.9455	111213446	4.64444e+06	0.187393
UN_16	U	13.3775	606927522	4.53693e+07	1.83055		UN_16	U	15.1542	108883223	7.18502e+06	0.2899
UN_20	U	20.5333	1033457335	5.03308e+07	2.03074		UN_20	U	19.7693	137787619	6.96978e+06	0.281216
UN_35	U	16.2844	643540173	3.95188e+07	1.5945		UN_35	U	16.5987	122561159	7.38378e+06	0.29792
UN_5	U	21.7567	1174756280	5.39951e+07	2.17859		UN_5	U	20.8172	149960011	7.20366e+06	0.290652
UN_39	U	12.2124	418137787	3.42388e+07	1.38146		UN_39	U	15.2555	97478138	6.3897e+06	0.257811
UN_29	U	18.1653	826345132	4.54903e+07	1.83544		UN_29	U	20.5316	166818295	8.12495e+06	0.327825
UN_38	U	13.7514	369472121	2.6868e+07	1.08407		UN_38	U	21.3933	118422328	5.53549e+06	0.223345
HF_15	H	19.5827	860538731	4.39438e+07	1.77304		HF_15	H	24.1903	254334758	1.05139e+07	0.424214
HF_1	H	19.8311	956415602	4.82281e+07	1.9459		HF_1	H	19.3316	121583283	6.28935e+06	0.253762
HF_4	H	17.7923	1006478260	5.65682e+07	2.28241		HF_4	H	15.8368	122362969	7.7265e+06	0.311748
HF_9	H	22.089	981422135	4.44304e+07	1.79267		HF_9	H	20.8493	132745297	6.36689e+06	0.256891
HF_13	H	23.0091	1319663356	5.7354e+07	2.31411		HF_13	H	18.5927	182854665	9.83476e+06	0.396812
HF_18	H	19.3268	866007752	4.48086e+07	1.80793		HF_18	H	19.3044	179156195	9.28059e+06	0.374452
HF_23	H	21.5289	1024679697	4.75955e+07	1.92038		HF_23	H	19.3682	165396196	8.53957e+06	0.344554
HF_25	H	18.4576	1070993813	5.80245e+07	2.34117		HF_25	H	18.5392	172866836	9.3244e+06	0.37622
HF_33	H	17.2246	774406463	4.49593e+07	1.81401		HF_33	H	18.2261	110575365	6.06687e+06	0.244785
HF_30	H	14.2954	505601627	3.53681e+07	1.42703		HF_30	H	20.9422	95288151	4.55005e+06	0.183585
HF_14	H	10.9812	270954785	2.46744e+07	0.995561		HF_14	H	26.6133	60211736	2.26247e+06	0.0912858
HF_19	H	15.209	544565196	3.58055e+07	1.44467		HF_19	H	20.9527	92548198	4.41701e+06	0.178217
HF_21	H	17.6595	734533111	4.15942e+07	1.67824		HF_21	H	18.9932	131279393	6.91192e+06	0.278881
HF_26	H	12.9934	598539885	4.60649e+07	1.85862		HF_26	H	16.1974	141598451	8.74205e+06	0.352723
HF_34	H	13.0789	464085769	3.54835e+07	1.43169		HF_34	H	17.8242	80189545	4.49891e+06	0.181522
LF_11	L	18.469	974918950	5.27868e+07	2.12983		LF_11	L	18.1458	150862480	8.31391e+06	0.335449
LF_36	L	16.5137	557008467	3.37301e+07	1.36094		LF_36	L	18.1284	94990253	5.23986e+06	0.211417
LF_3	L	17.1236	672750012	3.92879e+07	1.58518		LF_3	L	21.4264	87703697	4.09325e+06	0.165154
LF_6	L	16.8744	749722524	4.44296e+07	1.79264		LF_6	L	20.066	94326729	4.70082e+06	0.189668
LF_28	L	15.7334	714217917	4.5395e+07	1.83159		LF_28	L	17.1451	133697616	7.79801e+06	0.314633
LF_37	L	16.9916	593917089	3.49536e+07	1.4103		LF_37	L	19.6765	118890735	6.04227e+06	0.243793
LF_22	L	17.1287	615388631	3.59273e+07	1.44959		LF_22	L	20.6104	100890207	4.89511e+06	0.197507
LF_24	L	19.3324	852952836	4.41204e+07	1.78016		LF_24	L	18.3406	92404565	5.03825e+06	0.203283
LF_27	L	19.1048	1020815787	5.34324e+07	2.15589		LF_27	L	17.33	159333117	9.19406e+06	0.370961
LF_31	L	21.5919	965838674	4.47315e+07	1.80482		LF_31	L	19.8895	131956532	6.63448e+06	0.267687
LF_8	L	19.8479	949130538	4.78202e+07	1.92944		LF_8	L	19.0052	122912943	6.46733e+06	0.260943
AVERAGE		17.5426	7.78233e+08	4.34836e+07	1.75447		AVERAGE		19.2989	1.28051e+08	6.72157e+06	0.271201
SD		2.93706	2.39276e+08	8.07848e+06	0.32595		SD		2.35195	3.54319e+07	1.83018e+06	0.0738437
AVERAGE H		17.5373	7.98592e+08	4.43269e+07	1.7885		AVERAGE H		19.7174	1.36199e+08	7.02168e+06	0.28331
SD		3.58271	2.79303e+08	9.1091e+06	0.367533		SD		2.78701	4.91298e+07	2.39152e+06	0.0964928
AVERAGE L		18.0647	7.87878e+08	4.33286e+07	1.74822		AVERAGE L		19.0694	1.17088e+08	6.21976e+06	0.250954
SD		1.75054	1.70869e+08	6.73183e+06	0.271615		SD		1.3772	2.49017e+07	1.64096e+06	0.0662094
AVERAGE U		17.1071	7.46579e+08	4.26417e+07	1.7205		AVERAGE U		19.01	1.27926e+08	6.7999e+06	0.274362
SD		3.05491	2.53514e+08	8.39132e+06	0.338572		SD		2.55278	2.12027e+07	1.15769e+06	0.0467105
